# Supplementary material for: Identification and characterization of early human photoreceptor states and cell-state-specific retinoblastoma-related features
Source: eLife journal article supplement (doi:10.7554/elife.101918), 2024-11-22

Figure 3-figure supplement 2a (*left*)

Goat anti-total NRL

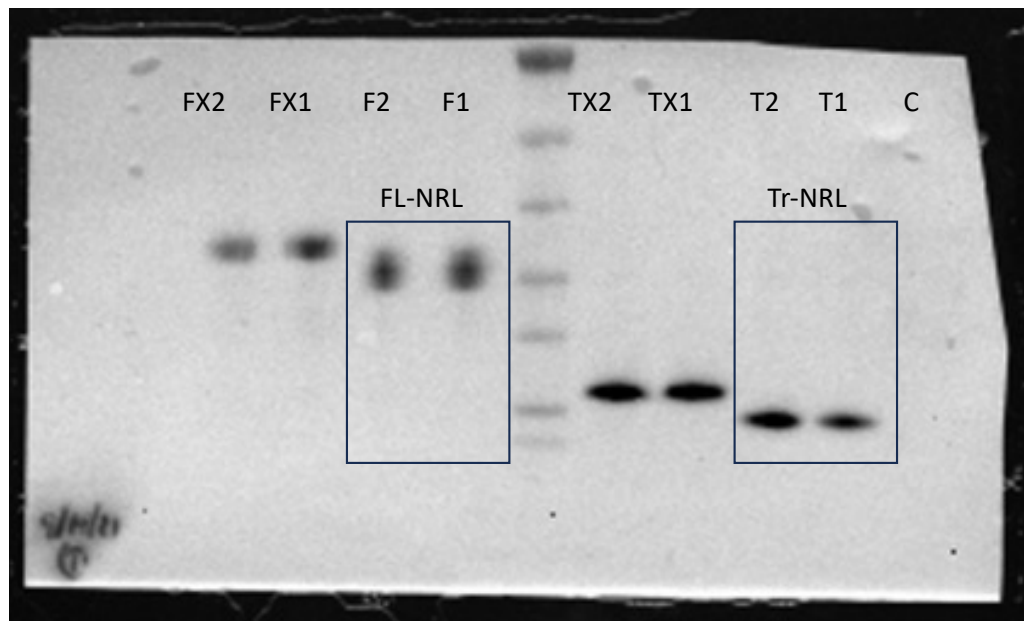

Figure 3-figure supplement 2a (*right*)

Mouse anti-N-term NRL

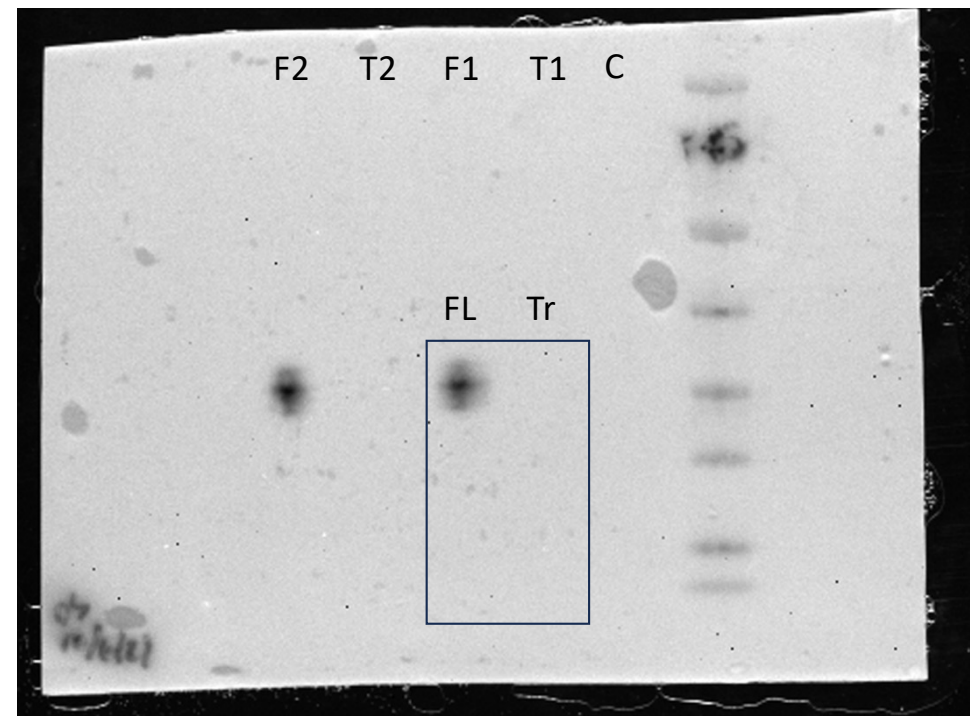

Figure 3-figure supplement 2c

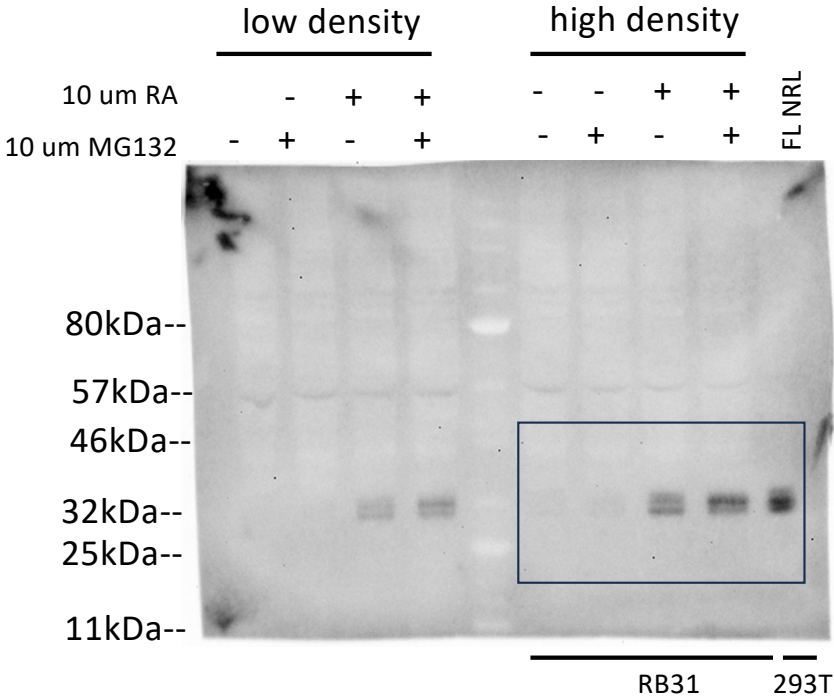

Supplement: fig3-figsupp2-data1 [file elife-101918-fig3-figsupp2-data1-v1.zip]
