# Supplementary material for: Identification and characterization of early human photoreceptor states and cell-state-specific retinoblastoma-related features
Source: eLife. 2025 Aug 6;13:RP101918. doi: 10.7554/eLife.101918 (PMC12327943; doi:10.7554/eLife.101918)
Supplement: Supplementary file 1. — (A) Differentially expressed genes for low resolution rod clusters. (B) Differentially expressed genes for low resolution cone clusters. (C) Differentially expressed genes for low resolution late- vs early-maturing L/M cone populations. (D) Differentially expressed genes in rods vs rod precursors in a 3' snRNA-seq dataset (data of Zuo et al. PMID 39117640). (E) Differentially expressed genes in cones vs cone precursors in a 3' snRNA-seq dataset data of Zuo et al. PMID 39117640. (F) SCENIC regulon specificity scores for low resolution clusters. (G) Differentially expressed genes for high resolution MG and RPC clusters. (H) SCENIC regulon specificity scores for high resolution clusters. (I) Pseudotime-correlated genes and gene modules. (J) Differentially expressed genes for low resolution early rod and L/M cone clusters. [file elife-101918-supp1.xlsx]

## Sheet: Supplementary File 1A
Supplementary File 1A	Differentially expressed genes for low resolution rod clusters (LR / ER)
ensgene	symbol	p_val	log2FC	p_val_adj
ENSG00000135318	NT5E	2.68e-34	-2.1398	1.51e-29
ENSG00000255599	AP000997.1	7.22e-31	-1.98427	4.06e-26
	GS1-345D13.1	1.43e-28	-0.395081	8.05e-24
ENSG00000127928	GNGT1	4.58e-28	-3.84224	2.58e-23
ENSG00000079101	CLUL1	2.98e-27	-2.43582	1.68e-22
ENSG00000204381	LAYN	4.61e-27	-2.21892	2.59e-22
ENSG00000187033	SAMD7	2.61e-26	-1.83682	1.47e-21
ENSG00000060138	YBX3	9.27e-26	-1.89328	5.22e-21
ENSG00000198734	F5	1.49e-24	-1.3529	8.37e-20
ENSG00000078369	GNB1	2.73e-24	-2.05934	1.54e-19
ENSG00000198515	CNGA1	9.67e-24	-1.94968	5.44e-19
ENSG00000198168	SVIP	1.41e-23	-1.43979	7.96e-19
ENSG00000109103	UNC119	2.77e-23	-1.71203	1.56e-18
ENSG00000240253	FAR2P3	3.84e-23	-0.584637	2.16e-18
	RP11-23E19.1	7.1e-23	-0.709337	3.99e-18
ENSG00000070729	CNGB1	2.1e-22	-1.80799	1.18e-17
	RP11-96L14.7	7.88e-22	-1.97954	4.43e-17
	RP11-379K17.4	9.25e-22	-0.732523	5.21e-17
ENSG00000185527	PDE6G	2.34e-21	-1.84967	1.32e-16
ENSG00000114349	GNAT1	4.03e-21	-1.9401	2.27e-16
ENSG00000281857	SAG	1.12e-20	-2.30363	6.3e-16
ENSG00000156475	PPP2R2B	6.49e-20	-1.55112	3.65e-15
ENSG00000182985	CADM1	9.7e-20	-1.35728	5.46e-15
ENSG00000168263	KCNV2	1.92e-19	-1.62534	1.08e-14
ENSG00000158258	CLSTN2	3.23e-19	-0.396107	1.82e-14
ENSG00000143320	CRABP2	9.52e-19	3.03405	5.36e-14
ENSG00000109047	RCVRN	3.07e-18	-0.676407	1.73e-13
ENSG00000156298	TSPAN7	3.22e-18	-1.719	1.81e-13
ENSG00000134215	VAV3	3.69e-18	-0.781216	2.08e-13
ENSG00000211840	TRAJ49	4.47e-18	-1.02236	2.52e-13
ENSG00000105976	MET	6.64e-18	-0.738861	3.73e-13
ENSG00000105507	CABP5	1.29e-17	-1.57664	7.28e-13
ENSG00000226926	PDZPH1P	2.7e-17	-0.391336	1.52e-12
ENSG00000277734	TRAC	3e-17	-1.64642	1.69e-12
ENSG00000178162	FAR2P2	3.69e-17	-1.01868	2.07e-12
ENSG00000175906	ARL4D	1.33e-16	-1.57777	7.51e-12
ENSG00000173890	GPR160	2e-16	-1.26392	1.13e-11
ENSG00000038295	TLL1	3.8e-16	-0.658837	2.14e-11
ENSG00000183644	C11orf88	4.27e-16	-1.6075	2.4e-11
ENSG00000173976	RAX2	5.07e-16	-1.26107	2.85e-11
ENSG00000115255	REEP6	6.38e-16	-1.53223	3.59e-11
ENSG00000156194	PPEF2	1.02e-15	-0.86656	5.74e-11
ENSG00000120049	KCNIP2	1.1e-15	-0.900552	6.16e-11
ENSG00000115306	SPTBN1	1.28e-15	-1.08298	7.19e-11
ENSG00000108370	RGS9	1.36e-15	-0.605	7.67e-11
ENSG00000164418	GRIK2	1.53e-15	-1.11384	8.61e-11
ENSG00000101265	RASSF2	1.53e-15	-0.767606	8.62e-11
ENSG00000232815	DUX4L50	2.04e-15	-0.65017	1.15e-10
ENSG00000119862	LGALSL	2.57e-15	-0.932759	1.44e-10
ENSG00000102104	RS1	3.12e-15	-0.804113	1.75e-10
ENSG00000145632	PLK2	4.29e-15	-1.44176	2.41e-10
ENSG00000282591	FAM138F	5.5e-15	-0.762146	3.09e-10
ENSG00000183185	GABRR3	7.42e-15	-1.04174	4.18e-10
ENSG00000166569	CPLX4	8.79e-15	-0.971836	4.94e-10
ENSG00000158270	COLEC12	9.42e-15	-0.455534	5.3e-10
ENSG00000151150	ANK3	1.03e-14	-0.734725	5.81e-10
ENSG00000118402	ELOVL4	1.21e-14	-1.11071	6.81e-10
ENSG00000167083	GNGT2	1.57e-14	-1.11361	8.81e-10
ENSG00000168309	FAM107A	1.59e-14	-1.0953	8.97e-10
ENSG00000218839	FAM138C	2.03e-14	-0.575455	1.14e-09
ENSG00000149489	ROM1	2.14e-14	-1.07671	1.2e-09
ENSG00000226516	FAM138B	2.37e-14	-0.657083	1.33e-09
ENSG00000173482	PTPRM	2.46e-14	-0.426308	1.38e-09
	AF131216.5	3.05e-14	-1.12805	1.71e-09
ENSG00000198830	HMGN2	3.42e-14	-0.914415	1.93e-09
ENSG00000042813	ZPBP	3.65e-14	-0.830958	2.05e-09
ENSG00000129535	NRL	5.11e-14	-0.88795	2.88e-09
ENSG00000112706	IMPG1	5.62e-14	-1.55331	3.16e-09
ENSG00000237613	FAM138A	5.97e-14	-0.814122	3.36e-09
ENSG00000154134	ROBO3	6.38e-14	-0.685861	3.59e-09
ENSG00000161714	PLCD3	6.84e-14	-0.425691	3.85e-09
ENSG00000021300	PLEKHB1	7.88e-14	-1.18052	4.44e-09
ENSG00000145147	SLIT2	1.11e-13	-0.616833	6.27e-09
ENSG00000248893	FAM138E	1.33e-13	-1.03399	7.5e-09
ENSG00000058091	CDK14	2.28e-13	-0.468181	1.28e-08
ENSG00000202474	RNA5SP283	2.4e-13	-0.367578	1.35e-08
ENSG00000132026	RTBDN	2.95e-13	-1.09369	1.66e-08
ENSG00000144746	ARL6IP5	3.76e-13	-1.0669	2.12e-08
ENSG00000104237	RP1	4.42e-13	-1.02106	2.49e-08
	5S-rRNA	5.16e-13	-0.363081	2.9e-08
ENSG00000144840	RABL3	5.16e-13	-0.747	2.91e-08
ENSG00000157890	MEGF11	5.18e-13	-0.661906	2.91e-08
ENSG00000172058	SERF1A	6.29e-13	-0.976516	3.54e-08
ENSG00000111674	ENO2	6.93e-13	-1.05026	3.9e-08
ENSG00000205572	SERF1B	7.45e-13	-1.04461	4.19e-08
ENSG00000170035	UBE2E3	8.05e-13	-1.19869	4.53e-08
ENSG00000105290	APLP1	8.24e-13	-1.17394	4.64e-08
ENSG00000183527	PSMG1	9.45e-13	-0.747409	5.32e-08
	AC007349.7	9.46e-13	-0.784551	5.32e-08
ENSG00000133069	TMCC2	1.03e-12	-0.912096	5.79e-08
ENSG00000213578	CPLX3	1.06e-12	-1.45319	5.97e-08
ENSG00000109472	CPE	1.07e-12	-0.840023	6.05e-08
ENSG00000120725	SIL1	2.11e-12	-0.83865	1.19e-07
ENSG00000205581	HMGN1	2.12e-12	-0.781952	1.19e-07
ENSG00000237289	CKMT1B	2.59e-12	-0.808676	1.46e-07
ENSG00000182534	MXRA7	3.21e-12	-0.661025	1.81e-07
ENSG00000269420	PLA2G4C-AS1	4.1e-12	-1.24425	2.3e-07
ENSG00000080166	DCT	4.21e-12	1.46319	2.37e-07
ENSG00000243335	KCTD7	4.63e-12	-0.626364	2.61e-07
ENSG00000165704	HPRT1	6.64e-12	-1.28318	3.74e-07
ENSG00000142684	ZNF593	1.18e-11	-0.698324	6.64e-07
ENSG00000254986	DPP3	1.18e-11	-0.719212	6.64e-07
	CTD-2193G5.1	1.2e-11	-0.685275	6.75e-07
ENSG00000223572	CKMT1A	1.21e-11	-0.678871	6.83e-07
ENSG00000214140	PRCD	1.28e-11	-1.15978	7.21e-07
ENSG00000254377	MIR124-2HG	1.73e-11	-0.871705	9.73e-07
ENSG00000114902	SPCS1	1.84e-11	-1.09433	1.03e-06
ENSG00000234814	SVILP1	2.07e-11	-0.594906	1.17e-06
ENSG00000106537	TSPAN13	2.28e-11	-0.578523	1.29e-06
ENSG00000179399	GPC5	2.9e-11	-0.740298	1.63e-06
	AC004540.5	3.01e-11	-1.09137	1.69e-06
ENSG00000164434	FABP7	3.07e-11	2.21034	1.73e-06
ENSG00000255580	AP000462.1	4.56e-11	-1.14516	2.57e-06
ENSG00000246922	UBAP1L	5.15e-11	-0.439706	2.9e-06
ENSG00000175287	PHYHD1	5.17e-11	-1.00103	2.91e-06
ENSG00000171159	C9orf16	5.39e-11	-0.923387	3.03e-06
ENSG00000106829	TLE4	6.99e-11	-0.606137	3.93e-06
ENSG00000123358	NR4A1	7.89e-11	-0.523657	4.44e-06
ENSG00000067057	PFKP	8.06e-11	-0.652722	4.54e-06
ENSG00000119632	IFI27L2	8.1e-11	-0.869428	4.56e-06
ENSG00000189043	NDUFA4	8.12e-11	-0.770132	4.57e-06
ENSG00000246705	H2AFJ	8.35e-11	-1.04701	4.7e-06
ENSG00000111110	PPM1H	1.03e-10	-0.382994	5.79e-06
ENSG00000186951	PPARA	1.08e-10	-0.595035	6.09e-06
ENSG00000140545	MFGE8	1.23e-10	-0.717436	6.91e-06
ENSG00000092853	CLSPN	1.29e-10	-0.426217	7.26e-06
ENSG00000109072	VTN	1.3e-10	-0.633142	7.29e-06
ENSG00000113811	SELENOK	1.32e-10	-0.796355	7.42e-06
ENSG00000076554	TPD52	1.39e-10	-0.888515	7.85e-06
ENSG00000127588	GNG13	1.43e-10	1.35684	8.07e-06
ENSG00000166165	CKB	1.52e-10	-0.66373	8.56e-06
ENSG00000100744	GSKIP	1.71e-10	-0.697168	9.6e-06
ENSG00000077585	GPR137B	1.73e-10	-1.02084	9.74e-06
ENSG00000230330	HMGN2P3	1.75e-10	-0.433676	9.85e-06
ENSG00000150510	FAM124A	1.96e-10	-0.610238	1.1e-05
ENSG00000105649	RAB3A	2.04e-10	-0.392405	1.15e-05
ENSG00000157510	AFAP1L1	2.31e-10	-0.544643	1.3e-05
ENSG00000198947	DMD	2.54e-10	-0.667485	1.43e-05
ENSG00000103187	COTL1	2.63e-10	-1.20374	1.48e-05
ENSG00000149328	GLB1L2	2.77e-10	-0.457955	1.56e-05
ENSG00000138449	SLC40A1	2.79e-10	-1.07318	1.57e-05
ENSG00000115641	FHL2	2.98e-10	-0.561667	1.68e-05
ENSG00000113657	DPYSL3	3.12e-10	-0.569254	1.76e-05
ENSG00000074317	SNCB	3.3e-10	-0.485324	1.85e-05
ENSG00000133640	LRRIQ1	3.37e-10	-0.365892	1.89e-05
ENSG00000117408	IPO13	3.76e-10	-0.650737	2.11e-05
ENSG00000164949	GEM	3.83e-10	-0.867114	2.16e-05
ENSG00000145391	SETD7	4.13e-10	-0.480304	2.32e-05
	RP11-431M3.2	4.42e-10	-1.42485	2.49e-05
ENSG00000082126	MPP4	4.88e-10	-0.860282	2.75e-05
ENSG00000197982	C1orf122	5.13e-10	-0.725769	2.89e-05
ENSG00000005469	CROT	5.2e-10	-0.71297	2.93e-05
ENSG00000161800	RACGAP1	5.77e-10	-0.899499	3.25e-05
ENSG00000121900	TMEM54	6.13e-10	-1.16233	3.45e-05
ENSG00000186326	RGS9BP	7.21e-10	-0.51857	4.06e-05
ENSG00000185774	KCNIP4	7.57e-10	-0.81614	4.26e-05
ENSG00000104341	LAPTM4B	7.6e-10	-0.780019	4.28e-05
ENSG00000120738	EGR1	8.79e-10	-0.99124	4.94e-05
ENSG00000102362	SYTL4	1.09e-09	1.26214	6.16e-05
ENSG00000133460	SLC2A11	1.16e-09	-0.481128	6.51e-05
ENSG00000125378	BMP4	1.22e-09	-1.29712	6.88e-05
ENSG00000102804	TSC22D1	1.32e-09	-0.884631	7.43e-05
ENSG00000106348	IMPDH1	1.35e-09	-0.94363	7.6e-05
ENSG00000162073	PAQR4	1.38e-09	-0.610313	7.74e-05
ENSG00000164588	HCN1	1.58e-09	-0.368238	8.91e-05
ENSG00000134243	SORT1	1.64e-09	-0.394627	9.2e-05
ENSG00000182541	LIMK2	1.77e-09	-0.557749	9.98e-05
ENSG00000162946	DISC1	1.98e-09	-0.498935	0.000111626
ENSG00000077044	DGKD	2.21e-09	-0.458121	0.000124092
ENSG00000092820	EZR	2.53e-09	1.3439	0.000142133
ENSG00000132437	DDC	2.96e-09	-0.639809	0.000166812
ENSG00000198570	RD3	3.08e-09	-0.689587	0.000173367
ENSG00000164442	CITED2	3.17e-09	-0.411884	0.00017839
ENSG00000101187	SLCO4A1	3.33e-09	-0.615875	0.000187328
ENSG00000143153	ATP1B1	3.56e-09	-0.913566	0.00020027
ENSG00000163618	CADPS	3.81e-09	1.74887	0.000214643
ENSG00000167615	LENG8	3.88e-09	-0.583772	0.000218424
ENSG00000251128	WWC2-AS1	3.89e-09	-0.685902	0.000219119
ENSG00000138175	ARL3	4.01e-09	-0.573523	0.000225759
ENSG00000172350	ABCG4	4.38e-09	-0.70966	0.000246242
	CTD-2015H6.3	5.57e-09	-0.405649	0.000313495
ENSG00000100024	UPB1	5.86e-09	-0.648759	0.00032998
ENSG00000149932	TMEM219	6.56e-09	-0.505033	0.000368996
ENSG00000003147	ICA1	6.94e-09	-0.365952	0.00039042
ENSG00000250722	SELENOP	7.59e-09	1.43244	0.000427191
ENSG00000207816	MIR124-2	7.64e-09	-0.36883	0.000429682
ENSG00000204209	DAXX	7.83e-09	-0.739484	0.00044036
ENSG00000115556	PLCD4	7.87e-09	-0.666354	0.000442997
ENSG00000154556	SORBS2	7.94e-09	-0.376436	0.000446562
ENSG00000005486	RHBDD2	8.36e-09	-0.871553	0.000470148
ENSG00000182768	NGRN	9.28e-09	-0.799137	0.000521899
ENSG00000055163	CYFIP2	9.31e-09	-0.548041	0.000524111
ENSG00000239672	NME1	9.53e-09	-1.2048	0.000536208
ENSG00000084234	APLP2	1.04e-08	-0.873619	0.000585402
ENSG00000112576	CCND3	1.07e-08	-0.858994	0.000600866
	RP11-266E6.3	1.09e-08	-0.384355	0.000612266
ENSG00000154217	PITPNC1	1.22e-08	-0.561357	0.000683869
ENSG00000106278	PTPRZ1	1.32e-08	-0.768885	0.000743291
ENSG00000054356	PTPRN	1.33e-08	-0.780399	0.000748218
ENSG00000163738	MTHFD2L	1.41e-08	-0.499158	0.000792705
ENSG00000042781	USH2A	1.41e-08	-0.660239	0.000794697
ENSG00000148798	INA	1.42e-08	-0.581192	0.000796515
ENSG00000224982	TMEM233	1.46e-08	-0.419604	0.00082131
ENSG00000167614	TTYH1	1.56e-08	-0.919277	0.000879141
ENSG00000112245	PTP4A1	1.6e-08	-0.687541	0.000903053
	RP11-6E9.5	1.64e-08	-0.831904	0.000922107
ENSG00000144043	TEX261	1.67e-08	-0.380128	0.000938219
ENSG00000139112	GABARAPL1	1.72e-08	-0.926637	0.000966877
ENSG00000005022	SLC25A5	1.75e-08	-0.912949	0.00098389
ENSG00000114648	KLHL18	1.79e-08	-0.541909	0.00100549
ENSG00000144031	ANKRD53	1.9e-08	-0.677968	0.00106743
ENSG00000176108	CHMP6	2e-08	-0.470003	0.00112603
ENSG00000243678	NME2	2.17e-08	-0.690298	0.00122193
ENSG00000198171	DDRGK1	2.24e-08	-0.75849	0.00126151
ENSG00000116353	MECR	2.43e-08	-0.692464	0.00136653
ENSG00000254402	LRRC24	2.51e-08	-0.471346	0.00141046
ENSG00000143162	CREG1	2.57e-08	-0.886221	0.00144851
ENSG00000173334	TRIB1	2.58e-08	-0.753497	0.00145292
ENSG00000163377	FAM19A4	2.58e-08	-0.771402	0.00145411
ENSG00000138083	SIX3	2.74e-08	0.796214	0.00154093
ENSG00000153902	LGI4	3.28e-08	0.575196	0.0018471
ENSG00000117410	ATP6V0B	3.48e-08	-0.707091	0.00195814
ENSG00000197977	ELOVL2	3.88e-08	-0.429121	0.002184
ENSG00000011052	NME1-NME2	3.93e-08	-0.407804	0.00221338
ENSG00000231782	LINC00575	3.95e-08	-1.33867	0.00222339
ENSG00000170324	FRMPD2	3.99e-08	-0.465417	0.00224644
ENSG00000188486	H2AFX	4.05e-08	-0.447852	0.0022789
ENSG00000143641	GALNT2	4.16e-08	-0.502685	0.00233864
ENSG00000185974	GRK1	4.21e-08	-0.38062	0.00236638
ENSG00000116741	RGS2	4.49e-08	-1.09148	0.00252475
ENSG00000109107	ALDOC	4.76e-08	-1.52894	0.0026794
ENSG00000130522	JUND	5.04e-08	0.827194	0.00283693
ENSG00000100060	MFNG	5.56e-08	1.04762	0.00312581
ENSG00000152953	STK32B	6.07e-08	-0.41984	0.00341704
ENSG00000176406	RIMS2	6.43e-08	-0.436755	0.00361716
ENSG00000133818	RRAS2	7.1e-08	-0.397448	0.00399547
ENSG00000178498	DTX3	7.16e-08	-0.378041	0.00402799
ENSG00000007062	PROM1	7.39e-08	-0.844957	0.00416084
ENSG00000117984	CTSD	7.42e-08	-0.374066	0.00417473
	RP11-3P22.2	7.76e-08	-0.548331	0.00436902
ENSG00000100003	SEC14L2	8.93e-08	-0.413746	0.00502259
ENSG00000226742	HSBP1L1	9.1e-08	-0.602181	0.00512245
	RP11-655M14.12	9.86e-08	-0.665598	0.00554927
ENSG00000107281	NPDC1	1.01e-07	-0.445973	0.00566896
ENSG00000213626	LBH	1.02e-07	-0.642158	0.00574753
ENSG00000197223	C1D	1.04e-07	-0.423468	0.00584826
ENSG00000104969	SGTA	1.09e-07	-0.585657	0.00612587
ENSG00000266524	GDF10	1.18e-07	-0.433416	0.00666556
ENSG00000053438	NNAT	1.23e-07	1.41827	0.00692441
ENSG00000176771	NCKAP5	1.35e-07	-0.371218	0.00760779
ENSG00000184182	UBE2F	1.36e-07	-0.553458	0.007626
ENSG00000108641	B9D1	1.38e-07	-0.813138	0.00778625
ENSG00000078053	AMPH	1.4e-07	-0.449625	0.00787458
ENSG00000154978	VOPP1	1.55e-07	-0.386135	0.00870236
ENSG00000104112	SCG3	1.69e-07	-0.608203	0.00950163
ENSG00000265203	RBP3	1.75e-07	-1.13754	0.00981919
ENSG00000000460	C1orf112	1.76e-07	-0.685916	0.00989975
ENSG00000111669	TPI1	1.76e-07	0.756859	0.00990852
ENSG00000121440	PDZRN3	1.8e-07	-0.390204	0.0101396
ENSG00000108387	2022-09-04	1.82e-07	-0.639791	0.0102325
ENSG00000152503	TRIM36	1.94e-07	-0.488687	0.0109304
ENSG00000069943	PIGB	1.95e-07	-0.395995	0.0109767
ENSG00000121073	SLC35B1	2.13e-07	-0.443285	0.0119709
ENSG00000152601	MBNL1	2.14e-07	-0.764279	0.012056
ENSG00000181751	C5orf30	2.58e-07	-0.540176	0.0145433
ENSG00000070731	ST6GALNAC2	2.6e-07	-0.405649	0.0146523
ENSG00000133256	PDE6B	2.65e-07	-0.550574	0.0148968
ENSG00000144485	HES6	2.69e-07	1.19407	0.0151399
ENSG00000183570	PCBP3	2.98e-07	-0.542316	0.0167538
ENSG00000166908	PIP4K2C	3.09e-07	-0.466406	0.0173992
ENSG00000184716	SERINC4	3.21e-07	-0.438008	0.0180452
ENSG00000243232	PCDHAC2	3.24e-07	-0.428798	0.0182171
ENSG00000072135	PTPN18	3.82e-07	-0.71829	0.0215198
ENSG00000118473	SGIP1	3.87e-07	-0.478441	0.0217535
ENSG00000181061	HIGD1A	3.88e-07	-0.636925	0.0218396
	AL035610.1	3.97e-07	0.472404	0.0223256
ENSG00000128271	ADORA2A	4.02e-07	-0.521417	0.0226459
	RP11-338N10.3	4.06e-07	-0.728509	0.0228523
ENSG00000087274	ADD1	4.17e-07	-0.725688	0.0234909
ENSG00000187634	SAMD11	4.18e-07	-0.56372	0.0235337
ENSG00000122711	SPINK4	4.39e-07	-0.845379	0.0247098
ENSG00000184113	CLDN5	4.76e-07	1.62516	0.0267962
ENSG00000064687	ABCA7	4.76e-07	-0.763054	0.0268075
ENSG00000162992	NEUROD1	5.19e-07	0.561897	0.0292295
ENSG00000142046	TMEM91	5.41e-07	1.17664	0.0304607
ENSG00000183576	SETD3	5.46e-07	-0.391389	0.0307035
ENSG00000257267	ZNF271P	5.98e-07	-0.580603	0.0336205
ENSG00000158321	AUTS2	6.14e-07	-0.413994	0.0345303
ENSG00000185883	ATP6V0C	6.44e-07	-0.366485	0.0362101
ENSG00000163293	NIPAL1	7.04e-07	-0.485798	0.0396129
ENSG00000187601	MAGEH1	7.16e-07	-0.372833	0.0402997
ENSG00000276700	RNA5-8S5	7.64e-07	2.541	0.0429773
ENSG00000090520	DNAJB11	7.83e-07	-0.551794	0.0440483
ENSG00000129451	KLK10	8.12e-07	-0.500194	0.04567
ENSG00000168615	ADAM9	8.19e-07	-0.461806	0.0460725
ENSG00000187193	MT1X	8.46e-07	-0.936423	0.0475837

## Sheet: Supplementary File 1B
Supplementary File 1B	Differentially expressed genes for low resolution cone clusters (S / LM)
ensgene	symbol	p_val	log2FC	p_val_adj
ENSG00000145794	MEGF10	1.32e-39	-0.706778	7.43e-35
ENSG00000128596	CCDC136	2.12e-29	-2.08752	1.19e-24
ENSG00000100024	UPB1	1.04e-23	-1.27343	5.85e-19
ENSG00000021645	NRXN3	7.71e-20	-1.10998	4.34e-15
ENSG00000100095	SEZ6L	6.37e-19	-0.981803	3.58e-14
ENSG00000171729	TMEM51	3.15e-17	-0.738197	1.77e-12
ENSG00000128617	OPN1SW	4.81e-17	-5.78445	2.71e-12
ENSG00000144476	ACKR3	6.05e-17	-1.10078	3.4e-12
ENSG00000133019	CHRM3	1.33e-14	-0.687639	7.49e-10
ENSG00000151090	THRB	4.73e-13	1.83022	2.66e-08
ENSG00000173334	TRIB1	5.77e-13	-1.01327	3.24e-08
ENSG00000042813	ZPBP	8.4e-13	-1.40166	4.73e-08
ENSG00000122711	SPINK4	1.1e-12	-1.83761	6.21e-08
	RP11-99J16--A.2	2.33e-12	-1.18557	1.31e-07
ENSG00000113296	THBS4	2.48e-12	-2.30851	1.4e-07
	RP11-23E19.1	3.71e-12	-0.59969	2.09e-07
ENSG00000018236	CNTN1	4.69e-12	1.78205	2.64e-07
ENSG00000163377	FAM19A4	6.03e-12	-2.19053	3.39e-07
ENSG00000121068	TBX2	7.34e-12	-0.842419	4.13e-07
ENSG00000232022	FAAHP1	1.3e-11	4.90984	7.31e-07
ENSG00000106069	CHN2	2.18e-11	-2.21211	1.23e-06
ENSG00000106069	CHN2	2.18e-11	-2.21211	1.23e-06
ENSG00000089157	RPLP0	4.34e-11	1.288	2.44e-06
ENSG00000213741	RPS29	5.01e-11	1.52711	2.82e-06
ENSG00000078018	MAP2	9.7e-11	-2.30951	5.46e-06
ENSG00000102104	RS1	1.25e-10	-1.27459	7.03e-06
ENSG00000164161	HHIP	1.91e-10	-0.406921	1.07e-05
ENSG00000135744	AGT	2.2e-10	-1.24608	1.24e-05
ENSG00000159556	ISL2	4.69e-10	1.74729	2.64e-05
ENSG00000170289	CNGB3	5.58e-10	-2.01141	3.14e-05
ENSG00000186298	PPP1CC	1.3e-09	-1.61107	7.33e-05
ENSG00000198242	RPL23A	1.56e-09	1.15101	8.8e-05
ENSG00000103811	CTSH	1.69e-09	-0.861642	9.48e-05
ENSG00000177954	RPS27	1.96e-09	1.18758	0.000110419
ENSG00000138449	SLC40A1	2.06e-09	2.20834	0.000115772
	AC007349.7	3.25e-09	-0.83143	0.000182802
ENSG00000181965	NEUROG1	4.11e-09	-1.26256	0.000231178
ENSG00000116703	PDC	5.51e-09	-1.48574	0.00031019
ENSG00000171385	KCND3	5.82e-09	-0.557808	0.000327672
ENSG00000143171	RXRG	6.19e-09	1.32166	0.000348213
ENSG00000143013	LMO4	7.54e-09	0.946545	0.000424266
ENSG00000111906	HDDC2	7.83e-09	1.81676	0.000440613
ENSG00000005469	CROT	1.13e-08	-1.33945	0.000637326
ENSG00000159674	SPON2	1.14e-08	2.02893	0.000642875
ENSG00000205592	MUC19	1.58e-08	0.629442	0.000886473
ENSG00000250208	FZD10-AS1	1.88e-08	-0.382262	0.00105962
ENSG00000246922	UBAP1L	2.01e-08	-0.650465	0.00112834
ENSG00000233476	EEF1A1P6	2.08e-08	0.818115	0.00117256
ENSG00000267280	TBX2-AS1	2.87e-08	-0.702355	0.00161596
ENSG00000171951	SCG2	3.81e-08	-0.549437	0.00214594
ENSG00000117450	PRDX1	4.32e-08	1.02274	0.00242869
ENSG00000248890	HHIP-AS1	4.63e-08	-1.18852	0.00260298
ENSG00000173826	KCNH6	4.83e-08	-1.0634	0.00271869
ENSG00000251321	PCAT4	4.9e-08	1.19554	0.00275707
ENSG00000156398	SFXN2	5.47e-08	-0.821045	0.00307543
	RP11-761N21.2	5.91e-08	0.531289	0.00332781
ENSG00000143774	GUK1	7.49e-08	1.02358	0.00421715
ENSG00000234851		8.25e-08	0.848005	0.0046442
ENSG00000188133	TMEM215	1.02e-07	-0.654835	0.00572005
ENSG00000156508	EEF1A1	1.11e-07	0.712331	0.00625685
ENSG00000101746	NOL4	1.13e-07	1.4621	0.00635311
ENSG00000130558	OLFM1	1.17e-07	1.53047	0.00657326
ENSG00000245910	SNHG6	1.33e-07	1.35868	0.00748765
ENSG00000198336	MYL4	1.47e-07	-0.363423	0.00828263
ENSG00000120833	SOCS2	1.48e-07	-0.698174	0.00833064
ENSG00000167083	GNGT2	1.82e-07	-1.5769	0.0102639
ENSG00000169282	KCNAB1	1.96e-07	-0.520612	0.0110045
ENSG00000140545	MFGE8	2.19e-07	-0.442203	0.0123328
ENSG00000183729	NPBWR1	2.35e-07	-0.694165	0.0132035
ENSG00000138207	RBP4	2.67e-07	1.69126	0.0150188
ENSG00000011052	NME1-NME2	2.8e-07	-1.07747	0.0157355
ENSG00000145425	RPS3A	2.81e-07	0.893996	0.0158351
ENSG00000109819	PPARGC1A	3.52e-07	-0.491286	0.0197938
ENSG00000145920	CPLX2	4.16e-07	-0.892924	0.0234331
ENSG00000143947	RPS27A	4.28e-07	0.856993	0.0240552
ENSG00000149564	ESAM	4.67e-07	-0.751355	0.0262804
ENSG00000129221	AIPL1	5.23e-07	0.880937	0.0294328
ENSG00000168300	PCMTD1	6.44e-07	-0.887846	0.0362576
ENSG00000105372	RPS19	6.46e-07	0.971124	0.0363213
ENSG00000265972	TXNIP	7.66e-07	-0.682644	0.0430981
ENSG00000053524	MCF2L2	8.61e-07	-0.420587	0.0484397

## Sheet: Supplementary File 1C
Supplementary File 1C	Differentially expressed genes for low resolution late vs early maturing L/M cone populations
ensgene	symbol	p_val	log2FC	p_val_adj
	RP11-907D1.2	1.51e-65	0.775448	8.48e-61
ENSG00000183067	IGSF5	1.69e-37	0.329759	9.49e-33
ENSG00000198336	MYL4	1.46e-33	1.20825	8.22e-29
ENSG00000188508	KRTDAP	1.95e-33	0.535447	1.1e-28
ENSG00000232560	LINC01549	1.95e-33	0.348032	1.1e-28
	RP11-464C19.2	1.95e-33	0.402878	1.1e-28
	RP13-349O20.2	1.95e-33	0.42274	1.1e-28
	CTC-458G6.2	3.29e-33	0.693465	1.85e-28
ENSG00000108370	RGS9	6.35e-33	0.320837	3.57e-28
ENSG00000127472	PLA2G5	4.23e-30	0.984868	2.38e-25
ENSG00000118271	TTR	3.68e-27	1.90546	2.07e-22
ENSG00000244239	AC007009.1	6.74e-27	0.984427	3.79e-22
ENSG00000188112	C6orf132	2.67e-25	0.308001	1.5e-20
ENSG00000154065	ANKRD29	1.01e-22	0.574916	5.67e-18
	RP11-143P4.2	1.01e-22	0.507799	5.67e-18
	RP11-279O9.4	1.32e-22	0.644165	7.42e-18
ENSG00000124490	CRISP2	2.67e-19	1.19646	1.5e-14
	RP11-44N21.1	4.21e-19	0.58815	2.37e-14
ENSG00000177112	MRVI1-AS1	7.21e-19	1.77259	4.06e-14
ENSG00000185988	PLK5	8.83e-19	0.324502	4.97e-14
	CTA-150C2.13	1.94e-17	0.293832	1.09e-12
	MGC45922	1.94e-17	0.273564	1.09e-12
ENSG00000105954	NPVF	1.94e-17	0.297862	1.09e-12
ENSG00000166160	OPN1MW2	3.58e-17	1.77234	2.02e-12
ENSG00000269433	OPN1MW3	3.58e-17	1.23404	2.02e-12
ENSG00000170231	FABP6	5.82e-17	1.35543	3.27e-12
	AC004854.4	1.3e-16	0.284345	7.29e-12
ENSG00000183036	PCP4	5.33e-16	3.23864	3e-11
	RP11-883G14.1	6.71e-15	1.1929	3.78e-10
ENSG00000166840	GLYATL1	1.82e-14	0.827467	1.03e-09
	RP11-38M8.1	2.83e-14	0.969527	1.59e-09
	RP11-240M16.1	2.85e-14	1.42773	1.6e-09
ENSG00000102076	OPN1LW	4.12e-14	1.27935	2.32e-09
	RP5-1115A15.1	6.16e-14	0.32115	3.47e-09
	AC063980.3	1.4e-13	0.783461	7.86e-09
	RP4-536B24.2	1.4e-13	0.864879	7.86e-09
	RP11-535M15.1	6.25e-13	0.373377	3.51e-08
ENSG00000138472	GUCA1C	1.34e-12	4.82537	7.54e-08
ENSG00000128596	CCDC136	2.76e-12	0.831014	1.55e-07
ENSG00000130595	TNNT3	1.35e-11	0.254279	7.59e-07
ENSG00000231445	TIMM8AP1	1.57e-11	0.540896	8.81e-07
ENSG00000204934	ATP6V0E2-AS1	3.19e-11	0.270517	1.79e-06
ENSG00000243749	TMEM35B	6.19e-11	0.78914	3.48e-06
ENSG00000147613	PSKH2	8.98e-11	0.4123	5.06e-06
ENSG00000160188	RSPH1	1.22e-10	0.727776	6.87e-06
ENSG00000172159	FRMD3	1.6e-10	0.386741	9.01e-06
ENSG00000268221	OPN1MW	2.7e-10	2.02759	1.52e-05
ENSG00000183644	C11orf88	3.03e-10	0.476014	1.71e-05
	RP11-6E9.5	3.03e-10	0.403135	1.71e-05
ENSG00000201176	RNU6-853P	3.4e-10	0.443981	1.92e-05
ENSG00000138028	CGREF1	3.76e-10	0.804396	2.11e-05
ENSG00000171951	SCG2	3.82e-10	0.502788	2.15e-05
ENSG00000138744	NAAA	1.51e-09	0.505199	8.48e-05
ENSG00000270876	ZNF30-AS1	1.56e-09	0.269043	8.79e-05
ENSG00000175315	CST6	2.68e-09	0.646063	0.00015083
ENSG00000252902	RNA5SP342	2.68e-09	0.314306	0.00015083
ENSG00000201367	RNU6-522P	2.68e-09	0.782293	0.00015083
	RP11-139K4.2	2.68e-09	0.277793	0.00015083
ENSG00000231292	IGKV1OR2-108	3.28e-09	0.326115	0.000184695
ENSG00000123977	DAW1	3.77e-09	1.20198	0.00021192
ENSG00000119915	ELOVL3	7.8e-09	0.317691	0.000438797
ENSG00000143942	CHAC2	1.07e-08	0.420871	0.000600851
ENSG00000003147	ICA1	1.73e-08	0.811319	0.000973386
	RP11-154D6.1	1.95e-08	0.268269	0.00109913
ENSG00000126709	IFI6	2.15e-08	0.809267	0.00120946
ENSG00000171773	NXNL1	2.19e-08	0.586124	0.00123179
ENSG00000139574	NPFF	2.39e-08	1.0717	0.00134399
ENSG00000156194	PPEF2	2.57e-08	0.301135	0.00144394
ENSG00000137393	RNF144B	2.81e-08	1.09849	0.00158096
ENSG00000273061	CDC37L1-AS1	4.22e-08	0.961477	0.00237623
ENSG00000168938	PPIC	5.88e-08	0.656953	0.00331016
ENSG00000158806	NPM2	5.98e-08	0.606377	0.00336204
	AC097724.3	6.28e-08	0.297918	0.00353605
ENSG00000174928	C3orf33	1.06e-07	0.537517	0.00594013
	RP11-441O15.3	1.12e-07	0.324154	0.00627798
ENSG00000163754	GYG1	1.37e-07	0.807314	0.00769905
ENSG00000132561	MATN2	1.57e-07	0.959906	0.00884806
	AF131216.5	1.63e-07	0.561393	0.00915385
ENSG00000006282	SPATA20	1.68e-07	0.402286	0.0094785
ENSG00000185774	KCNIP4	1.78e-07	0.815266	0.00999224
	CTC-543D15.8	2.07e-07	0.438394	0.0116745
	RP11-105N14.1	2.25e-07	0.254907	0.0126549
	RP11-169K17.3	2.65e-07	1.69421	0.0149369
ENSG00000155761	SPAG17	3.23e-07	0.33113	0.0181702
ENSG00000165548	TMEM63C	3.7e-07	0.308237	0.0208344
ENSG00000197635	DPP4	4.24e-07	0.505317	0.0238338
ENSG00000107984	DKK1	5.32e-07	0.286252	0.0299555
ENSG00000148604	RGR	5.32e-07	0.853699	0.0299576
ENSG00000160190	SLC37A1	6.53e-07	0.26907	0.0367428
ENSG00000251818	SCARNA20	7.4e-07	0.384033	0.041655
ENSG00000204091	TDRG1	7.66e-07	1.10942	0.0430821
ENSG00000196433	ASMT	7.98e-07	2.53729	0.0448895

## Sheet: Supplementary File 1D
Supplementary File 1D: Differentially expressed genes in rods vs rod precursors in a 3’ snRNA-seq dataset (data of Zuo et al., PMID 39117640).
	ensgene	p_val	avg_log2FC	pct.1	pct.2	p_val_adj	symbol
1	ENSG00000042813	0	3.00332	0.796	0.174	0	ZPBP
2	ENSG00000185774	0	3.52922	0.823	0.237	0	KCNIP4
3	ENSG00000154229	0	3.18704	0.704	0.118	0	PRKCA
4	ENSG00000132932	0	2.49209	0.79	0.207	0	ATP8A2
5	ENSG00000172260	0	3.57653	0.69	0.109	0	NEGR1
6	ENSG00000151090	0	2.24584	0.803	0.224	0	THRB
7	ENSG00000134215	0	2.47095	0.754	0.183	0	VAV3
8	ENSG00000145147	0	2.50656	0.76	0.197	0	SLIT2
9	ENSG00000127928	0	2.61829	0.678	0.144	0	GNGT1
10	ENSG00000158258	0	2.59246	0.696	0.17	0	CLSTN2
11	ENSG00000151150	0	1.72978	0.943	0.431	0	ANK3
12	ENSG00000156475	0	1.8097	0.923	0.415	0	PPP2R2B
13	ENSG00000038295	0	1.74666	0.949	0.446	0	TLL1
14	ENSG00000187720	0	2.43179	0.679	0.178	0	THSD4
15	ENSG00000156687	0	2.01163	0.842	0.346	0	UNC5D
16	ENSG00000058091	0	2.04634	0.768	0.276	0	CDK14
17	ENSG00000231185	0	3.8144	0.548	0.057	0	SPRY4-AS1
18	ENSG00000198734	0	2.21534	0.662	0.175	0	F5
19	ENSG00000179399	0	1.58749	0.976	0.492	0	GPC5
20	ENSG00000064042	0	2.14019	0.727	0.246	0	LIMCH1
21	ENSG00000154162	0	1.69058	0.884	0.405	0	CDH12
22	ENSG00000164418	0	1.7373	0.88	0.425	0	GRIK2
23	ENSG00000044524	0	1.39187	0.807	0.36	0	EPHA3
24	ENSG00000150672	0	1.46042	0.902	0.456	0	DLG2
25	ENSG00000187033	0	2.0442	0.587	0.147	0	SAMD7
26	ENSG00000112706	0	1.40261	0.837	0.397	0	IMPG1
27	ENSG00000271850	0	1.41666	0.721	0.281	0	LINC02343
28	ENSG00000113657	0	2.19584	0.604	0.165	0	DPYSL3
29	ENSG00000225179	0	1.34189	0.723	0.289	0	LINC00457
30	ENSG00000185052	0	1.65261	0.66	0.228	0	SLC24A3
31	ENSG00000162946	0	1.26079	0.919	0.495	0	DISC1
32	ENSG00000071909	0	1.69483	0.623	0.199	0	MYO3B
33	ENSG00000165895	0	1.51408	0.693	0.27	0	ARHGAP42
34	ENSG00000158270	0	1.71446	0.629	0.207	0	COLEC12
35	ENSG00000111110	0	2.31369	0.547	0.126	0	PPM1H
36	ENSG00000248905	0	1.71557	0.983	0.563	0	FMN1
37	ENSG00000106078	0	1.07272	0.753	0.333	0	COBL
38	ENSG00000135090	0	1.51289	0.707	0.287	0	TAOK3
39	ENSG00000149970	0	1.44141	0.764	0.348	0	CNKSR2
40	ENSG00000198515	0	1.29081	0.796	0.383	0	CNGA1
41	ENSG00000183049	0	1.44666	0.706	0.299	0	CAMK1D
42	ENSG00000156194	0	4.17337	0.437	0.035	0	PPEF2
43	ENSG00000173482	0	1.38374	0.687	0.292	0	PTPRM
44	ENSG00000115306	0	1.35427	0.867	0.472	0	SPTBN1
45	ENSG00000230448	0	1.44978	0.638	0.244	0	LINC00276
46	ENSG00000185737	0	1.1775	0.698	0.304	0	NRG3
47	ENSG00000255580	0	1.26576	0.881	0.489	0
48	ENSG00000152601	0	1.09109	0.916	0.532	0	MBNL1
49	ENSG00000130561	0	3.13803	0.452	0.07	0	SAG
50	ENSG00000164588	0	1.31331	0.95	0.572	0	HCN1
51	ENSG00000271901	0	1.35794	0.611	0.233	0
52	ENSG00000182601	0	1.26862	0.659	0.284	0	HS3ST4
53	ENSG00000078369	0	1.2165	0.874	0.507	0	GNB1
54	ENSG00000167081	0	1.08065	0.773	0.408	0	PBX3
55	ENSG00000185046	0	1.2173	0.864	0.501	0	ANKS1B
56	ENSG00000182263	0	1.42785	0.592	0.23	0	FIGN
57	ENSG00000249853	0	1.34524	0.628	0.267	0	HS3ST5
58	ENSG00000070729	0	1.08674	0.873	0.513	0	CNGB1
59	ENSG00000183185	0	3.2372	0.409	0.051	0	GABRR3
60	ENSG00000227110	0	1.10519	0.698	0.34	0	LMCD1-AS1
61	ENSG00000270792	0	1.9178	0.505	0.148	0
62	ENSG00000000460	0	1.25818	0.7	0.343	0	C1orf112
63	ENSG00000154310	0	1.44454	0.559	0.203	0	TNIK
64	ENSG00000150867	0	1.37203	0.6	0.246	0	PIP4K2A
65	ENSG00000173890	0	0.993943	0.849	0.496	0	GPR160
66	ENSG00000156298	0	1.28833	0.634	0.282	0	TSPAN7
67	ENSG00000057019	0	1.18341	0.711	0.361	0	DCBLD2
68	ENSG00000101542	0	-2.56325	0.155	0.505	0	CDH20
69	ENSG00000186094	0	0.89363	0.827	0.478	0	AGBL4
70	ENSG00000165959	0	1.51071	0.531	0.183	0	CLMN
71	ENSG00000082438	0	0.91084	0.813	0.471	0	COBLL1
72	ENSG00000018236	0	1.8021	0.487	0.145	0	CNTN1
73	ENSG00000174453	0	1.36274	0.537	0.196	0	VWC2L
74	ENSG00000151718	0	1.09724	0.639	0.298	0	WWC2
75	ENSG00000204442	0	1.25846	0.946	0.605	0	NALF1
76	ENSG00000111885	0	1.32025	0.651	0.312	0	MAN1A1
77	ENSG00000183783	0	0.859671	0.794	0.457	0	KCTD8
78	ENSG00000144847	0	0.994154	0.719	0.385	0	IGSF11
79	ENSG00000253496	0	0.739853	0.704	0.37	0
80	ENSG00000187164	0	1.19623	0.601	0.268	0	SHTN1
81	ENSG00000068796	0	1.19666	0.663	0.331	0	KIF2A
82	ENSG00000168234	0	2.14714	0.436	0.104	0	TTC39C
83	ENSG00000170153	0	0.999171	0.694	0.362	0	RNF150
84	ENSG00000169247	0	2.33111	0.415	0.083	0	SH3TC2
85	ENSG00000146350	0	1.35031	0.556	0.225	0	TBC1D32
86	ENSG00000153904	0	1.46825	0.51	0.179	0	DDAH1
87	ENSG00000082126	0	1.06014	0.903	0.573	0	MPP4
88	ENSG00000101746	0	-2.34036	0.341	0.671	0	NOL4
89	ENSG00000038945	0	0.859355	0.633	0.304	0	MSR1
90	ENSG00000077044	0	1.07997	0.678	0.352	0	DGKD
91	ENSG00000040199	0	1.38939	0.534	0.208	0	PHLPP2
92	ENSG00000173210	0	2.4001	0.401	0.075	0	ABLIM3
93	ENSG00000133640	0	1.27535	0.52	0.194	0	LRRIQ1
94	ENSG00000155816	0	1.99852	0.421	0.098	0	FMN2
95	ENSG00000187672	0	0.956739	0.763	0.443	0	ERC2
96	ENSG00000139970	0	1.93621	0.45	0.131	0	RTN1
97	ENSG00000198168	0	2.48485	0.396	0.078	0	SVIP
98	ENSG00000259044	0	3.05357	0.367	0.049	0
99	ENSG00000283003	0	0.828058	0.734	0.416	0
100	ENSG00000078053	0	1.25761	0.535	0.219	0	AMPH
101	ENSG00000108684	0	1.76477	0.436	0.12	0	ASIC2
102	ENSG00000246922	0	1.16836	0.567	0.251	0	UBAP1L
103	ENSG00000114349	0	1.00157	0.672	0.358	0	GNAT1
104	ENSG00000171094	0	0.674581	0.903	0.59	0	ALK
105	ENSG00000186951	0	0.99936	0.66	0.348	0	PPARA
106	ENSG00000105507	0	0.831219	0.854	0.542	0	CABP5
107	ENSG00000132694	0	0.788482	0.698	0.389	0	ARHGEF11
108	ENSG00000135931	0	0.916384	0.81	0.502	0	ARMC9
109	ENSG00000182168	0	0.668667	0.808	0.503	0	UNC5C
110	ENSG00000161800	0	1.09607	0.564	0.259	0	RACGAP1
111	ENSG00000177570	0	0.8195	0.637	0.333	0	SAMD12
112	ENSG00000183023	0	0.688173	0.847	0.544	0	SLC8A1
113	ENSG00000249364	0	1.45654	0.573	0.27	0	LINC02997
114	ENSG00000120910	0	1.41524	0.476	0.174	0	PPP3CC
115	ENSG00000023171	0	1.17032	0.932	0.631	0	GRAMD1B
116	ENSG00000157890	0	1.54788	0.451	0.15	0	MEGF11
117	ENSG00000170145	0	0.99736	0.823	0.523	0	SIK2
118	ENSG00000198570	0	0.890646	0.611	0.312	0	RD3
119	ENSG00000165238	0	1.13562	0.513	0.215	0	WNK2
120	ENSG00000106829	0	1.14263	0.499	0.201	0	TLE4
121	ENSG00000256061	0	1.10746	0.553	0.256	0	DNAAF4
122	ENSG00000151067	0	0.97844	0.604	0.307	0	CACNA1C
123	ENSG00000151067	0	0.97844	0.604	0.307	0	CACNA1C
124	ENSG00000177679	0	0.8539	0.733	0.437	0	SRRM3
125	ENSG00000214870	0	0.909758	0.847	0.552	0	LINC02981
126	ENSG00000114541	0	0.861711	0.674	0.38	0	FRMD4B
127	ENSG00000071205	0	2.11206	0.405	0.112	0	ARHGAP10
128	ENSG00000163531	0	2.14104	0.377	0.084	0	NFASC
129	ENSG00000167306	0	0.860595	0.887	0.596	0	MYO5B
130	ENSG00000105976	0	2.3386	0.357	0.067	0	MET
131	ENSG00000154556	0	1.08614	0.938	0.648	0	SORBS2
132	ENSG00000124788	0	0.944511	0.933	0.644	0	ATXN1
133	ENSG00000183853	0	1.20774	0.476	0.188	0	KIRREL1
134	ENSG00000133019	0	1.3256	0.448	0.162	0	CHRM3
135	ENSG00000108370	0	3.11984	0.325	0.039	0	RGS9
136	ENSG00000261873	0	0.84034	0.915	0.63	0	SMIM36
137	ENSG00000164574	0	2.40552	0.353	0.068	0	GALNT10
138	ENSG00000156831	0	0.756652	0.809	0.525	0	NSMCE2
139	ENSG00000248757	0	2.81693	0.33	0.047	0	LINC02115
140	ENSG00000120029	0	0.838944	0.772	0.489	0	ARMH3
141	ENSG00000188730	0	3.10495	0.321	0.039	0	VWC2
142	ENSG00000153237	0	1.53006	0.407	0.127	0	CCDC148
143	ENSG00000184985	0	-2.51406	0.123	0.402	0	SORCS2
144	ENSG00000228624	0	1.13858	0.495	0.216	0	HDAC2-AS2
145	ENSG00000113578	0	3.95105	0.3	0.022	0	FGF1
146	ENSG00000166569	0	1.01248	0.486	0.209	0	CPLX4
147	ENSG00000152953	0	1.1651	0.492	0.216	0	STK32B
148	ENSG00000145743	0	0.74861	0.858	0.582	0	FBXL17
149	ENSG00000254377	0	0.88377	0.863	0.589	0	MIR124-2HG
150	ENSG00000079101	0	2.09198	0.347	0.075	0	CLUL1
151	ENSG00000118473	0	0.878524	0.964	0.693	0	SGIP1
152	ENSG00000102104	0	1.55099	0.39	0.12	0	RS1
153	ENSG00000064655	0	-1.94502	0.277	0.545	0	EYA2
154	ENSG00000152503	0	0.981067	0.488	0.221	0	TRIM36
155	ENSG00000128573	0	-1.62274	0.496	0.763	0	FOXP2
156	ENSG00000197321	0	1.00264	0.497	0.23	0	SVIL
157	ENSG00000154217	0	0.933365	0.948	0.681	0	PITPNC1
158	ENSG00000099204	0	1.59638	0.381	0.115	0	ABLIM1
159	ENSG00000166762	0	1.1811	0.435	0.169	0	CATSPER2
160	ENSG00000107295	0	1.6341	0.375	0.111	0	SH3GL2
161	ENSG00000150275	0	0.816409	0.807	0.546	0	PCDH15
162	ENSG00000135318	0	2.2658	0.325	0.066	0	NT5E
163	ENSG00000164434	0	-2.98973	0.129	0.388	0	FABP7
164	ENSG00000233008	0	1.24088	0.413	0.156	0	LINC01725
165	ENSG00000233008	0	1.24088	0.413	0.156	0	LINC01725
166	ENSG00000152061	0	0.839992	0.913	0.656	0	RABGAP1L
167	ENSG00000139132	0	0.960726	0.956	0.7	0	FGD4
168	ENSG00000144935	0	1.24475	0.408	0.156	0	TRPC1
169	ENSG00000156140	0	1.32328	0.385	0.133	0	ADAMTS3
170	ENSG00000250387	0	1.46587	0.376	0.124	0	LINC02197
171	ENSG00000168807	0	1.37016	0.416	0.164	0	SNTB2
172	ENSG00000079841	0	1.02458	0.429	0.178	0	RIMS1
173	ENSG00000248647	0	2.07394	0.315	0.066	0
174	ENSG00000101265	0	1.7468	0.341	0.093	0	RASSF2
175	ENSG00000197959	0	1.12925	0.43	0.183	0	DNM3
176	ENSG00000107957	0	1.27169	0.386	0.14	0	SH3PXD2A
177	ENSG00000134775	0	0.729937	0.92	0.675	0	FHOD3
178	ENSG00000140545	0	2.17697	0.312	0.069	0	MFGE8
179	ENSG00000250994	0	1.46505	0.371	0.131	0
180	ENSG00000186314	0	1.58247	0.348	0.108	0	PRELID2
181	ENSG00000112182	0	0.741848	0.95	0.713	0	BACH2
182	ENSG00000147862	0	-2.03606	0.408	0.644	0	NFIB
183	ENSG00000286863	0	3.15202	0.265	0.032	0
184	ENSG00000280650	0	3.62945	0.254	0.023	0	KCNIP4-IT1
185	ENSG00000144229	0	-1.46492	0.394	0.625	0	THSD7B
186	ENSG00000183580	0	1.43765	0.358	0.13	0	FBXL7
187	ENSG00000135127	0	1.90254	0.303	0.075	0	BICDL1
188	ENSG00000248343	0	3.5009	0.247	0.022	0
189	ENSG00000248528	0	1.67431	0.311	0.087	0	LINC02058
190	ENSG00000286071	0	1.44699	0.325	0.102	0
191	ENSG00000144840	0	1.32142	0.341	0.12	0	RABL3
192	ENSG00000168502	0	2.12023	0.281	0.06	0	MTCL1
193	ENSG00000003987	0	1.54294	0.32	0.101	0	MTMR7
194	ENSG00000139517	0	1.25296	0.35	0.131	0	LNX2
195	ENSG00000185527	0	1.32362	0.333	0.115	0	PDE6G
196	ENSG00000091428	0	1.57469	0.316	0.098	0	RAPGEF4
197	ENSG00000154240	0	0.741688	0.946	0.728	0	CEP112
198	ENSG00000248752	0	1.37831	0.333	0.116	0
199	ENSG00000250243	0	3.59139	0.231	0.02	0
200	ENSG00000232885	0	1.55413	0.294	0.088	0	GPC5-AS2
201	ENSG00000164949	0	2.7663	0.246	0.041	0	GEM
202	ENSG00000285842	0	3.9078	0.22	0.018	0
203	ENSG00000184305	0	0.699417	0.977	0.78	0	CCSER1
204	ENSG00000287159	0	1.65318	0.273	0.077	0
205	ENSG00000254033	0	2.18529	0.253	0.058	0
206	ENSG00000049759	0	0.6026	0.946	0.752	0	NEDD4L
207	ENSG00000286889	0	2.01668	0.244	0.054	0
208	ENSG00000225718	0	1.72871	0.255	0.07	0
209	ENSG00000092871	0	2.39869	0.23	0.045	0	RFFL
210	ENSG00000163491	0	1.5034	0.259	0.075	0	NEK10
211	ENSG00000115556	0	1.66879	0.253	0.071	0	PLCD4
212	ENSG00000198691	0	0.663216	0.958	0.778	0	ABCA4
213	ENSG00000147526	0	2.25367	0.225	0.046	0	TACC1
214	ENSG00000169031	0	2.45133	0.212	0.039	0	COL4A3
215	ENSG00000250092	0	3.60278	0.185	0.015	0
216	ENSG00000204381	0	3.31042	0.187	0.019	0	LAYN
217	ENSG00000157445	0	2.6393	0.196	0.033	0	CACNA2D3
218	ENSG00000100024	0	2.20608	0.202	0.04	0	UPB1
219	ENSG00000260254	0	1.82862	0.206	0.051	0
220	ENSG00000183570	0	0.723163	0.967	0.812	0	PCBP3
221	ENSG00000274863	0	2.82255	0.175	0.024	0
222	ENSG00000157510	0	1.7414	0.198	0.05	0	AFAP1L1
223	ENSG00000163075	0	2.30926	0.176	0.032	0	CFAP221
224	ENSG00000186231	0	1.87491	0.188	0.046	0	KLHL32
225	ENSG00000261742	0	2.46011	0.172	0.03	0	LINC00922
226	ENSG00000169862	0	-1.43834	0.774	0.912	0	CTNND2
227	ENSG00000132915	0	3.44815	0.152	0.015	0	PDE6A
228	ENSG00000250072	0	2.18754	0.161	0.03	0	SH3TC2-DT
229	ENSG00000264630	0	3.36619	0.144	0.013	0	PRKCA-AS1
230	ENSG00000145349	0	0.523493	0.972	0.845	0	CAMK2D
231	ENSG00000156564	0	2.63576	0.15	0.023	0	LRFN2
232	ENSG00000171724	0	3.67837	0.138	0.012	0	VAT1L
233	ENSG00000167526	0	-1.18472	0.654	0.779	0	RPL13
234	ENSG00000106536	0	2.53439	0.145	0.025	0	POU6F2
235	ENSG00000183644	0	3.46449	0.129	0.011	0	HOATZ
236	ENSG00000042781	0	0.674873	0.997	0.889	0	USH2A
237	ENSG00000173988	0	2.84938	0.121	0.016	0	LRRC63
238	ENSG00000180071	0	3.27562	0.116	0.012	0	ANKRD18A
239	ENSG00000180071	0	3.27562	0.116	0.012	0	ANKRD18A
240	ENSG00000250390	0	3.53626	0.114	0.01	0
241	ENSG00000170289	0	2.7817	0.123	0.019	0	CNGB3
242	ENSG00000144290	0	2.82	0.12	0.017	0	SLC4A10
243	ENSG00000236714	0	4.11202	0.109	0.007	0	LINC01844
244	ENSG00000198947	0	1.02021	0.997	0.9	0	DMD
245	ENSG00000258144	0	2.99777	0.1	0.011	0	LINC02406
246	ENSG00000233290	0	3.73172	0.086	0.007	0
247	ENSG00000176771	0	0.684679	0.996	0.921	0	NCKAP5
248	ENSG00000259925	0	3.87084	0.078	0.006	0
249	ENSG00000176406	0	0.516553	0.999	0.928	0	RIMS2
250	ENSG00000104237	0	0.657549	0.995	0.925	0	RP1
251	ENSG00000143924	0	-1.02232	0.758	0.822	0	EML4
252	ENSG00000150625	0	-0.888037	0.854	0.908	0	GPM6A
253	ENSG00000158321	0	0.748993	1	0.949	0	AUTS2
254	ENSG00000163618	0	-1.00896	0.915	0.95	0	CADPS
255	ENSG00000182985	0	1.20426	1	0.967	0	CADM1
256	ENSG00000198963	0	-1.10353	0.906	0.913	0	RORB
257	ENSG00000123636	0	-0.5925	0.992	0.988	0	BAZ2B
258	ENSG00000145416	0	-0.369716	0.999	0.996	0	MARCHF1
259	ENSG00000175161	0	0.290556	1	0.999	0	CADM2
260	ENSG00000065534	1.53474655957152e-306	0.995138	0.475	0.213	5.58617052752841e-302	MYLK
261	ENSG00000060138	8.04897286261101e-306	1.44493	0.281	0.093	2.92966514253316e-301	YBX3
262	ENSG00000066855	1.29107064136546e-303	0.946905	0.616	0.336	4.699238920442e-299	MTFR1
263	ENSG00000114648	2.28559423827841e-301	0.895857	0.622	0.333	8.31910590848575e-297	KLHL18
264	ENSG00000092200	8.70827060968529e-301	0.861081	0.697	0.41	3.16963633651325e-296	RPGRIP1
265	ENSG00000138448	9.68737186237601e-299	0.908544	0.581	0.301	3.52600961046762e-294	ITGAV
266	ENSG00000162409	1.09207058004104e-298	1.03867	0.428	0.183	3.97491849723338e-294	PRKAA2
267	ENSG00000115977	1.17559423383284e-298	0.809818	0.713	0.422	4.27892789230475e-294	AAK1
268	ENSG00000165995	4.16006240522512e-297	0.544964	0.957	0.786	1.51417951425384e-292	CACNB2
269	ENSG00000166974	7.38450340433477e-297	1.56091	0.242	0.074	2.68781154910977e-292	MAPRE2
270	ENSG00000187416	9.01906541582252e-297	0.843227	0.505	0.239	3.28275943005108e-292	LHFPL3
271	ENSG00000188316	2.74610322126867e-296	1.26586	0.315	0.113	9.9952665047737e-292	ENO4
272	ENSG00000164199	2.11956556382566e-295	-0.499956	0.989	0.979	7.71479473921262e-291	ADGRV1
273	ENSG00000121440	5.71808326574535e-295	0.931547	0.592	0.317	2.08126794706599e-290	PDZRN3
274	ENSG00000270207	1.35237717701063e-292	1.68488	0.196	0.051	4.92238244888329e-288
275	ENSG00000187514	6.9575594043986e-291	-0.927249	0.698	0.797	2.532412472013e-286	PTMA
276	ENSG00000177103	1.25966478386502e-290	0.600297	0.924	0.714	4.58492788031189e-286	DSCAML1
277	ENSG00000185070	5.95003855846337e-286	2.63395	0.119	0.02	2.1656950345095e-281	FLRT2
278	ENSG00000185070	5.95003855846337e-286	2.63395	0.119	0.02	2.1656950345095e-281	FLRT2
279	ENSG00000256717	6.19975153434301e-286	1.45041	0.25	0.08	2.25658556347017e-281	LINC02698
280	ENSG00000112619	2.73638946732743e-285	0.612972	0.891	0.666	9.95991038317837e-281	PRPH2
281	ENSG00000112249	5.70610953133592e-285	1.07144	0.338	0.129	2.07690974721565e-280	ASCC3
282	ENSG00000148948	8.51710346673979e-285	0.478075	0.994	0.891	3.10005531982395e-280	LRRC4C
283	ENSG00000188312	6.15506692685527e-283	0.944497	0.467	0.218	2.24032126003678e-278	CENPP
284	ENSG00000112530	1.12441762543639e-282	1.64092	0.194	0.052	4.09265527306338e-278	PACRG
285	ENSG00000260071	1.95287257138872e-282	0.720084	0.678	0.379	7.10806558534065e-278
286	ENSG00000007062	3.50629872638891e-282	0.503836	0.959	0.833	1.27622261043104e-277	PROM1
287	ENSG00000223935	9.83280894248532e-282	1.29922	0.268	0.089	3.5789457988858e-277	LGALSL-DT
288	ENSG00000112297	2.80153221446914e-281	2.29016	0.13	0.024	1.01970169542248e-276	CRYBG1
289	ENSG00000244137	4.3938024028763e-281	0.862425	0.521	0.252	1.59925619859891e-276
290	ENSG00000118402	7.85888140794172e-281	1.01619	0.412	0.178	2.86047565486263e-276	ELOVL4
291	ENSG00000140859	2.53665802735155e-280	0.670543	0.772	0.466	9.23292788795417e-276	KIFC3
292	ENSG00000163914	2.44767637713663e-279	3.20712	0.072	0.006	8.9090524775019e-275	RHO
293	ENSG00000151062	2.63249686156101e-279	0.788285	0.657	0.369	9.58176207670977e-275	CACNA2D4
294	ENSG00000259833	2.63540965788797e-279	2.24015	0.123	0.022	9.59236407278065e-275
295	ENSG00000256972	2.26743166355109e-278	1.20784	0.318	0.118	8.25299776899326e-274
296	ENSG00000286046	6.39458586656119e-278	0.769197	0.74	0.466	2.32750136371094e-273
297	ENSG00000120549	6.325811618859e-277	-0.576578	0.977	0.971	2.3024689130323e-272	KIAA1217
298	ENSG00000255599	4.85297735552106e-276	1.96658	0.143	0.03	1.76638669786255e-271
299	ENSG00000081377	1.94585353827064e-275	1.11793	0.393	0.169	7.08251770859747e-271	CDC14B
300	ENSG00000229956	2.08997254213363e-275	1.10701	0.309	0.114	7.60708205885797e-271	ZRANB2-DT
301	ENSG00000241484	2.62984445094518e-274	3.28663	0.077	0.008	9.57210783255027e-270	ARHGAP8
302	ENSG00000169379	4.36686307014671e-274	0.754765	0.675	0.39	1.589450820272e-269	ARL13B
303	ENSG00000277443	6.94007322521555e-274	-1.36835	0.401	0.589	2.52604785251396e-269	MARCKS
304	ENSG00000243144	3.32691866149345e-273	1.50877	0.22	0.066	1.21093185441038e-268	LINC02932
305	ENSG00000103489	9.6234463750086e-271	0.932235	0.509	0.251	3.50274201157563e-266	XYLT1
306	ENSG00000186468	1.019992268254e-270	-1.1597	0.602	0.731	3.71256785799089e-266	RPS23
307	ENSG00000250938	6.90114712554699e-269	1.35037	0.26	0.089	2.51187953075659e-264	MAD2L1-DT
308	ENSG00000236782	1.01761641950759e-267	1.56294	0.216	0.065	3.70392024372371e-263	ZNF593OS
309	ENSG00000248550	1.33729585109054e-267	0.444412	0.994	0.917	4.86748943879936e-263	OTX2-AS1
310	ENSG00000053524	1.39115986704271e-267	1.09533	0.369	0.153	5.06354368406205e-263	MCF2L2
311	ENSG00000286530	1.14066496967305e-266	2.17514	0.127	0.025	4.15179235661598e-262
312	ENSG00000284052	6.55449146994924e-266	1.57171	0.202	0.058	2.38570380523212e-261
313	ENSG00000166111	9.89172764457667e-266	0.883246	0.413	0.18	3.60039102807302e-261	SVOP
314	ENSG00000135749	1.28621081836062e-265	2.5397	0.113	0.02	4.681550136669e-261	PCNX2
315	ENSG00000109103	4.15929929485043e-265	0.7858	0.654	0.371	1.51390175733966e-260	UNC119
316	ENSG00000003989	9.57330617161792e-264	1.78497	0.167	0.042	3.48449198034549e-259	SLC7A2
317	ENSG00000104219	2.38560811076515e-263	0.840891	0.553	0.289	8.683136401563e-259	ZDHHC2
318	ENSG00000223653	3.79196994855182e-263	1.24327	0.267	0.093	1.38020122187389e-258	BCL10-AS1
319	ENSG00000171444	1.39785022105142e-262	0.647636	0.814	0.544	5.08789523458297e-258	MCC
320	ENSG00000151746	2.51345341874122e-261	0.653281	0.804	0.534	9.1484677535343e-257	BICD1
321	ENSG00000142541	1.15399748607545e-257	-1.03096	0.716	0.803	4.20032004981743e-253	RPL13A
322	ENSG00000080166	1.40549927500269e-257	-3.93877	0.045	0.267	5.1157362611548e-253	DCT
323	ENSG00000198948	1.98743324941518e-257	1.84425	0.147	0.033	7.23385954122139e-253	MFAP3L
324	ENSG00000198948	1.98743324941518e-257	1.84425	0.147	0.033	7.23385954122139e-253	MFAP3L
325	ENSG00000197585	2.35030674760582e-253	0.560973	0.549	0.279	8.55464649993565e-249
326	ENSG00000151743	4.87102632690991e-253	0.916197	0.449	0.212	1.77295616246867e-248	AMN1
327	ENSG00000224184	1.65471272675146e-251	0.985955	0.398	0.179	6.02282338282995e-247	MIR3681HG
328	ENSG00000145703	3.58616378460683e-251	0.624555	0.793	0.519	1.30529189432119e-246	IQGAP2
329	ENSG00000069188	2.18181800036883e-249	1.23936	0.272	0.099	7.94138115774245e-245	SDK2
330	ENSG00000150593	4.73940598938518e-249	0.723797	0.731	0.474	1.72504899201642e-244	PDCD4
331	ENSG00000003147	5.74802206606643e-249	2.21907	0.116	0.022	2.09216507160686e-244	ICA1
332	ENSG00000184156	1.73676397390588e-248	0.635245	0.811	0.551	6.32147351222264e-244	KCNQ3
333	ENSG00000157423	5.89450089583036e-246	0.81653	0.525	0.272	2.14548043606434e-241	HYDIN
334	ENSG00000108298	1.90453228659114e-244	-1.1796	0.516	0.662	6.93211661673445e-240	RPL19
335	ENSG00000170832	3.18780598530886e-244	0.762632	0.627	0.366	1.16029762253272e-239	USP32
336	ENSG00000143641	3.24621797292988e-244	0.885386	0.431	0.202	1.18155841778702e-239	GALNT2
337	ENSG00000168263	1.50970617202632e-243	0.828631	0.553	0.295	5.49502852494139e-239	KCNV2
338	ENSG00000164270	7.30773263129265e-243	2.73823	0.085	0.012	2.6598685231379e-238	HTR4
339	ENSG00000091129	9.96072913179233e-243	0.501044	0.964	0.836	3.62550618938977e-238	NRCAM
340	ENSG00000213626	7.38478034126214e-242	1.02486	0.386	0.173	2.6879123486126e-237	LBH
341	ENSG00000134569	2.53916178521402e-241	1.1282	0.327	0.134	9.242041065822e-237	LRP4
342	ENSG00000168309	2.28898481018925e-240	0.751315	0.583	0.317	8.33144691212683e-236	FAM107A
343	ENSG00000278570	3.42974759581616e-240	0.448598	0.973	0.867	1.24835952992517e-235	NR2E3
344	ENSG00000166450	6.56199906954967e-240	1.03084	0.375	0.166	2.38843642133469e-235	PRTG
345	ENSG00000166402	3.62648782077983e-239	0.915038	0.383	0.168	1.31996903700744e-234	TUB
346	ENSG00000158019	4.44697204674608e-239	0.762903	0.542	0.285	1.61860888557464e-234	BABAM2
347	ENSG00000142534	4.8200512875046e-239	-1.05341	0.648	0.742	1.75440226762592e-234	RPS11
348	ENSG00000147403	1.90780166413922e-238	-1.0399	0.687	0.771	6.94401649713393e-234	RPL10
349	ENSG00000119685	4.49360722734196e-238	0.657338	0.79	0.534	1.63558315860793e-233	TTLL5
350	ENSG00000163629	8.74844885920411e-238	0.3341	0.999	0.971	3.18426041577311e-233	PTPN13
351	ENSG00000181826	1.22253198532843e-237	2.11176	0.115	0.023	4.44977192019844e-233	RELL1
352	ENSG00000184349	6.21754898698147e-237	0.788898	0.406	0.186	2.26306348028152e-232	EFNA5
353	ENSG00000143850	5.73609306844413e-236	1.31304	0.245	0.086	2.08782315505229e-231	PLEKHA6
354	ENSG00000198825	2.27304489451306e-235	0.95596	0.391	0.178	8.27342880704864e-231	INPP5F
355	ENSG00000144724	5.02554975608985e-235	-2.06875	0.158	0.382	1.82919960022158e-230	PTPRG
356	ENSG00000102362	1.10257727059176e-234	-2.64485	0.082	0.301	4.01316074949989e-230	SYTL4
357	ENSG00000172380	1.12769854501467e-234	1.72609	0.142	0.034	4.1045971641444e-230	GNG12
358	ENSG00000170324	6.42484984028431e-234	0.691025	0.612	0.342	2.33851684486668e-229	FRMPD2
359	ENSG00000140988	1.15613722646303e-233	-1.45857	0.403	0.571	4.20810827688014e-229	RPS2
360	ENSG00000105186	9.80434783339637e-232	1.67187	0.158	0.041	3.56858652439961e-227	ANKRD27
361	ENSG00000107864	7.93844846900665e-231	0.87783	0.434	0.21	2.88943647374904e-226	CPEB3
362	ENSG00000238018	8.41581413452695e-231	1.711	0.153	0.039	3.06318802868512e-226	SPTBN1-AS2
363	ENSG00000129038	4.12452776714381e-230	-1.82943	0.193	0.413	1.50124561668501e-225	LOXL1
364	ENSG00000120594	4.31791889784459e-230	1.09439	0.304	0.124	1.57163612043747e-225	PLXDC2
365	ENSG00000136828	9.29332704247047e-230	0.786214	0.499	0.256	3.3825851769184e-225	RALGPS1
366	ENSG00000255367	5.88885857644858e-229	2.42486	0.093	0.015	2.14342674465575e-224
367	ENSG00000224982	4.57066818340116e-228	1.87656	0.155	0.041	1.66363180539435e-223	TMEM233
368	ENSG00000117600	2.44526410951317e-226	0.990719	0.342	0.148	8.90027230580602e-222	PLPPR4
369	ENSG00000229151	4.65928649870189e-225	2.07935	0.111	0.022	1.69588709979751e-220
370	ENSG00000171735	6.57786201877049e-225	0.530834	0.897	0.699	2.39421021759208e-220	CAMTA1
371	ENSG00000143947	2.16505635583877e-224	-1.12274	0.562	0.68	7.88037212398197e-220	RPS27A
372	ENSG00000144283	4.34825069302165e-224	0.576362	0.86	0.63	1.58267628724602e-219	PKP4
373	ENSG00000086062	7.14546106436403e-224	1.29467	0.201	0.064	2.60080491820722e-219	B4GALT1
374	ENSG00000286318	9.01950385574648e-224	3.43046	0.057	0.005	3.28291901341461e-219
375	ENSG00000154678	2.23306585129343e-223	-1.54	0.329	0.524	8.12791308553783e-219	PDE1C
376	ENSG00000232079	1.35193999790722e-222	-3.02978	0.049	0.252	4.92079120438268e-218	LINC01697
377	ENSG00000116353	2.48015859851493e-222	1.17405	0.271	0.104	9.02728126687464e-218	MECR
378	ENSG00000145425	2.55728660138074e-222	-1.15405	0.629	0.721	9.30801177170563e-218	RPS3A
379	ENSG00000048471	6.9211325808215e-221	0.756557	0.65	0.401	2.51915383676741e-216	SNX29
380	ENSG00000046653	7.81942132805442e-221	0.690703	0.746	0.508	2.84611297498525e-216	GPM6B
381	ENSG00000109794	1.36822849875206e-220	1.19572	0.241	0.087	4.98007808975774e-216	FAM149A
382	ENSG00000152092	2.59675769579943e-220	0.733746	0.491	0.253	9.45167866117078e-216	ASTN1
383	ENSG00000156959	2.93658812290044e-220	1.22923	0.239	0.086	1.0688593449733e-215	LHFPL4
384	ENSG00000178607	8.23955994258111e-220	0.864059	0.379	0.172	2.99903502790067e-215	ERN1
385	ENSG00000203739	8.48576703562484e-220	0.930537	0.356	0.158	3.08864948562673e-215	PRDX6-AS1
386	ENSG00000225087	6.68842766790528e-219	3.68707	0.051	0.004	2.43445390256416e-214
387	ENSG00000122584	1.05337985240825e-217	2.83012	0.07	0.008	3.83409198679554e-213	NXPH1
388	ENSG00000254787	1.06046209364415e-215	1.33335	0.194	0.062	3.85986992844599e-211
389	ENSG00000118997	2.97297173625211e-215	1.14611	0.245	0.09	1.08210225256104e-210	DNAH7
390	ENSG00000143320	3.9270049808329e-214	-4.72435	0.013	0.194	1.42935127292356e-209	CRABP2
391	ENSG00000179361	5.67159235103715e-214	0.743473	0.566	0.32	2.0643461839305e-209	ARID3B
392	ENSG00000258776	8.60110904593173e-214	0.520821	0.896	0.695	3.13063167053823e-209
393	ENSG00000241288	1.43503673130648e-213	1.02024	0.325	0.14	5.22324669460932e-209	LINC02614
394	ENSG00000150907	1.54003546606667e-213	0.773248	0.501	0.268	5.60542108938947e-209	FOXO1
395	ENSG00000089009	4.50183999318954e-213	-1.0913	0.563	0.676	1.63857972072113e-208	RPL6
396	ENSG00000240891	5.15729237730223e-213	1.08056	0.325	0.142	1.87715127949047e-208	PLCXD2
397	ENSG00000135773	1.66461673724003e-212	0.944161	0.331	0.143	6.05887200020626e-208	CAPN9
398	ENSG00000251034	1.80190806055708e-212	1.25438	0.221	0.077	6.55858495881566e-208
399	ENSG00000139053	2.17405885769806e-212	1.14278	0.225	0.079	7.9131394302494e-208	PDE6H
400	ENSG00000116016	4.84448683465777e-212	0.959635	0.339	0.15	1.76329631807874e-207	EPAS1
401	ENSG00000073417	1.00758448421552e-211	0.920038	0.34	0.15	3.66740600564765e-207	PDE8A
402	ENSG00000151883	4.04875501773649e-211	1.67296	0.157	0.044	1.47366585135573e-206	PARP8
403	ENSG00000079691	9.51864714889453e-211	0.504769	0.883	0.662	3.46459718925463e-206	CARMIL1
404	ENSG00000147614	1.56862162677872e-210	0.691425	0.527	0.287	5.70946899714919e-206	ATP6V0D2
405	ENSG00000119912	3.03146677948215e-210	0.802975	0.437	0.218	1.10339327839591e-205	IDE
406	ENSG00000111912	3.888440841616e-210	0.987768	0.305	0.128	1.41531469753139e-205	NCOA7
407	ENSG00000106546	9.4820057600805e-210	1.18435	0.229	0.082	3.4512604565541e-205	AHR
408	ENSG00000072110	1.20706579662534e-209	1.6669	0.145	0.039	4.39347808655691e-205	ACTN1
409	ENSG00000183287	1.68488848806734e-208	2.35767	0.082	0.013	6.13265711886749e-204	CCBE1
410	ENSG00000091490	8.4831943035508e-208	0.833553	0.411	0.2	3.08771306260642e-203	SEL1L3
411	ENSG00000205325	1.3190515992419e-207	2.38546	0.087	0.015	4.80108401092066e-203
412	ENSG00000125430	1.68000341621797e-207	0.676145	0.611	0.359	6.11487643435018e-203	HS3ST3B1
413	ENSG00000171944	8.15751811219294e-207	3.95709	0.046	0.003	2.96917344247599e-202	OR52A5
414	ENSG00000139116	2.11443323451591e-203	0.68186	0.545	0.304	7.69611408699102e-199	KIF21A
415	ENSG00000143669	2.26828334377354e-203	0.60375	0.742	0.494	8.25609771466692e-199	LYST
416	ENSG00000187017	2.82603747094237e-203	1.19631	0.204	0.069	1.0286211186736e-198	ESPN
417	ENSG00000169306	9.86348161642333e-203	1.08455	0.296	0.128	3.59011003874576e-198	IL1RAPL1
418	ENSG00000057935	2.0635588678454e-202	0.974026	0.31	0.134	7.51094156718368e-198	MTA3
419	ENSG00000286920	1.4144509582011e-201	2.15027	0.089	0.016	5.14831859766037e-197	SMIM40
420	ENSG00000113580	1.47824528472972e-201	0.817275	0.348	0.157	5.38051718735925e-197	NR3C1
421	ENSG00000196914	2.17778337518554e-201	0.581768	0.712	0.453	7.92669592900034e-197	ARHGEF12
422	ENSG00000018189	2.77020166355957e-201	0.595604	0.73	0.479	1.00829800150241e-196	RUFY3
423	ENSG00000105640	3.48761615153504e-201	-1.13587	0.558	0.665	1.26942252683572e-196	RPL18A
424	ENSG00000184792	4.55437285001831e-201	0.631426	0.661	0.413	1.65770062994966e-196	OSBP2
425	ENSG00000109667	9.50279951580627e-201	1.09471	0.277	0.113	3.45882896776316e-196	SLC2A9
426	ENSG00000142676	1.14735898932501e-200	-1.07875	0.558	0.662	4.17615724934517e-196	RPL11
427	ENSG00000234173	1.80933735799856e-199	0.846303	0.359	0.167	6.58562611564315e-195
428	ENSG00000147604	1.87827418522946e-199	-1.10705	0.57	0.67	6.83654237939818e-195	RPL7
429	ENSG00000178075	2.50511024023102e-199	0.558818	0.69	0.428	9.11810025239287e-195	GRAMD1C
430	ENSG00000154710	2.7445559543598e-199	0.653325	0.716	0.479	9.98963476267881e-195	RABGEF1
431	ENSG00000197157	1.00596575870229e-198	0.502472	0.844	0.615	3.6615141685246e-194	SND1
432	ENSG00000251200	1.92152112636222e-198	3.02926	0.06	0.007	6.99395259573322e-194
433	ENSG00000140937	2.4487815521075e-198	-1.26829	0.39	0.564	8.91307509336087e-194	CDH11
434	ENSG00000248319	5.01389086989131e-198	1.6243	0.132	0.034	1.82495599882304e-193	LINC02275
435	ENSG00000231782	5.77592790949301e-198	1.81464	0.116	0.027	2.10232224049727e-193	LINC00575
436	ENSG00000069535	8.85689416291943e-198	2.07484	0.098	0.019	3.22373233741941e-193	MAOB
437	ENSG00000069667	1.46423591394321e-197	0.369416	0.991	0.926	5.32952587957051e-193	RORA
438	ENSG00000155530	6.84913041004295e-197	0.723408	0.469	0.244	2.49294648664743e-192	LRGUK
439	ENSG00000137642	1.5192977734226e-196	2.169	0.097	0.019	5.52994003570358e-192	SORL1
440	ENSG00000131389	2.5553912175006e-196	0.767491	0.459	0.238	9.30111295345869e-192	SLC6A6
441	ENSG00000132475	1.49234822060924e-195	-0.610302	0.828	0.864	5.43184905337353e-191	H3-3B
442	ENSG00000101935	2.92329862280564e-195	0.841555	0.381	0.184	1.0640222327288e-190	AMMECR1
443	ENSG00000156482	4.0376665059139e-195	-1.10714	0.539	0.653	1.46962985482254e-190	RPL30
444	ENSG00000174628	6.99242300073586e-195	0.805512	0.405	0.201	2.54510212380784e-190	IQCK
445	ENSG00000175287	1.3369773441691e-194	1.2108	0.211	0.075	4.86633013730669e-190	PHYHD1
446	ENSG00000250421	2.43572802108599e-193	1.59129	0.129	0.033	8.86556285114877e-189
447	ENSG00000198780	1.00072590270341e-192	0.773849	0.401	0.199	3.64244214065988e-188	FAM169A
448	ENSG00000122507	4.13908731681615e-192	0.313365	0.996	0.954	1.50654500157474e-187	BBS9
449	ENSG00000064999	4.619903489238e-191	0.593559	0.689	0.438	1.68155247201285e-186	ANKS1A
450	ENSG00000196586	5.46060965730159e-190	1.10835	0.257	0.104	1.98755270306463e-185	MYO6
451	ENSG00000171723	5.48464314195838e-190	0.360718	0.983	0.884	1.99630041081001e-185	GPHN
452	ENSG00000008083	8.33272178215396e-190	0.513787	0.827	0.595	3.0329440742684e-185	JARID2
453	ENSG00000166444	9.67968471225012e-190	0.834128	0.372	0.18	3.5232116415648e-185	DENND2B
454	ENSG00000171773	1.11480170254903e-189	3.71455	0.046	0.004	4.05765523693797e-185	NXNL1
455	ENSG00000253108	1.14522309691868e-189	2.06636	0.089	0.017	4.16838302816461e-185
456	ENSG00000163041	2.47835126579397e-188	-0.726556	0.761	0.81	9.02070293723691e-184	H3-3A
457	ENSG00000041515	2.72254534582419e-188	-3.31053	0.044	0.221	9.9095205497309e-184	MYO16
458	ENSG00000167615	6.01858518787637e-188	0.757447	0.471	0.252	2.19064463668324e-183	LENG8
459	ENSG00000231312	8.12397403082888e-188	0.696506	0.473	0.255	2.95696406774109e-183	MAP4K3-DT
460	ENSG00000177600	1.68338948458899e-187	-1.15762	0.481	0.61	6.127201046007e-183	RPLP2
461	ENSG00000184384	2.33786878921094e-186	0.376853	0.988	0.902	8.50937481896999e-182	MAML2
462	ENSG00000172456	3.99068407972402e-186	0.689699	0.435	0.224	1.45252919133795e-181	FGGY
463	ENSG00000178803	5.17935164413466e-186	1.57184	0.148	0.043	1.88518041143213e-181	ADORA2A-AS1
464	ENSG00000146950	1.66831149631498e-185	0.91309	0.302	0.133	6.07232018428726e-181	SHROOM2
465	ENSG00000250305	1.99186189843916e-185	0.908453	0.317	0.143	7.24997893793885e-181	TRMT9B
466	ENSG00000226824	2.50010260738625e-185	0.747311	0.451	0.239	9.09987347036447e-181
467	ENSG00000177694	6.86740633635186e-185	0.518671	0.774	0.535	2.49959855830535e-180	NAALADL2
468	ENSG00000107954	7.58545466512063e-185	1.28534	0.18	0.06	2.76095378901061e-180	NEURL1
469	ENSG00000035403	1.72652447278383e-184	1.01947	0.27	0.113	6.28420377603857e-180	VCL
470	ENSG00000068615	1.80956701265043e-184	1.21977	0.204	0.074	6.58646201264502e-180	REEP1
471	ENSG00000227227	3.34207347800636e-184	0.989763	0.27	0.113	1.21644790452476e-179
472	ENSG00000184009	5.55134597555544e-184	-1.31151	0.398	0.538	2.02057890818267e-179	ACTG1
473	ENSG00000159023	2.22052527428828e-183	0.428492	0.953	0.839	8.08226789335447e-179	EPB41
474	ENSG00000097096	7.94086051332481e-183	1.14345	0.202	0.073	2.89031440963996e-178	SYDE2
475	ENSG00000122406	2.21057744752762e-182	-1.1053	0.518	0.632	8.04605979351102e-178	RPL5
476	ENSG00000138175	5.79350348252921e-182	0.759972	0.465	0.253	2.10871939757098e-177	ARL3
477	ENSG00000122912	1.14422515672004e-181	0.713828	0.443	0.233	4.16475072542961e-177	SLC25A16
478	ENSG00000133460	4.24627316957398e-181	1.13865	0.21	0.078	1.54555850826154e-176	SLC2A11
479	ENSG00000137818	1.15785037881482e-180	-0.964018	0.669	0.735	4.21434380881018e-176	RPLP1
480	ENSG00000141447	1.43187244966235e-180	0.863269	0.307	0.138	5.21172934228103e-176	OSBPL1A
481	ENSG00000205846	3.67730155651796e-180	3.82669	0.041	0.003	1.33846422054141e-175	CLEC6A
482	ENSG00000005469	7.96335441678882e-180	0.857248	0.328	0.152	2.8985017406228e-175	CROT
483	ENSG00000145362	6.61758828353704e-179	0.590383	0.579	0.349	2.40866978344181e-174	ANK2
484	ENSG00000182197	6.79412035623362e-179	0.473903	0.771	0.521	2.47292392726191e-174	EXT1
485	ENSG00000102763	6.95940000893846e-178	0.524904	0.734	0.484	2.53308241525342e-173	VWA8
486	ENSG00000237975	8.08594594317097e-178	0.785769	0.342	0.163	2.94312260439537e-173	FLG-AS1
487	ENSG00000197756	1.20483484881336e-177	-0.952152	0.655	0.727	4.38535788271089e-173	RPL37A
488	ENSG00000059377	1.83952524247212e-177	1.97444	0.103	0.024	6.69550397755002e-173	TBXAS1
489	ENSG00000105372	2.83257005313376e-177	-1.10542	0.53	0.639	1.03099884793962e-172	RPS19
490	ENSG00000135541	1.82009331279885e-176	0.413097	0.968	0.855	6.62477563992527e-172	AHI1
491	ENSG00000269420	7.11154098104244e-176	0.962535	0.307	0.141	2.58845868627983e-171	PLA2G4C-AS1
492	ENSG00000163377	2.58679976449732e-175	0.395087	0.902	0.677	9.41543378281736e-171	TAFA4
493	ENSG00000196116	3.0595658803154e-174	0.579374	0.665	0.423	1.1136207891172e-169	TDRD7
494	ENSG00000152642	5.03813214881829e-174	1.13305	0.221	0.086	1.83377933952688e-169	GPD1L
495	ENSG00000110721	5.90992953370641e-174	0.899757	0.281	0.123	2.15109615167846e-169	CHKA
496	ENSG00000127328	1.22641256608839e-173	0.897542	0.281	0.123	4.46389645804853e-169	RAB3IP
497	ENSG00000149403	1.55301596926137e-173	1.24518	0.174	0.059	5.65266752491752e-169	GRIK4
498	ENSG00000164684	3.95288238070354e-173	-0.764601	0.736	0.783	1.43877012892848e-168	ZNF704
499	ENSG00000198804	8.87961993863139e-173	-1.33941	0.464	0.595	3.23200406526305e-168	MT-CO1
500	ENSG00000260364	3.13180041866154e-172	2.4135	0.063	0.009	1.13991271638443e-167
501	ENSG00000129535	5.3683319396999e-172	-0.676422	0.743	0.801	1.95396545941197e-167	NRL
502	ENSG00000113448	1.18532449038197e-171	0.499019	0.701	0.46	4.3143440800923e-167	PDE4D
503	ENSG00000117602	1.33975110492143e-171	1.65847	0.119	0.032	4.87642607169303e-167	RCAN3
504	ENSG00000198108	1.36926739464384e-171	0.861857	0.281	0.124	4.98385946302464e-167	CHSY3
505	ENSG00000286068	1.45003376477344e-170	0.698879	0.517	0.298	5.27783289702236e-166
506	ENSG00000151468	1.12096271376055e-169	1.24283	0.167	0.056	4.08008008554565e-165	CCDC3
507	ENSG00000116141	3.40892085284128e-169	0.5392	0.555	0.322	1.24077901201717e-164	MARK1
508	ENSG00000138326	3.76845795616191e-169	-1.05436	0.562	0.655	1.37164332688381e-164	RPS24
509	ENSG00000156508	1.33605148593888e-168	-0.743933	0.9	0.909	4.86296019852033e-164	EEF1A1
510	ENSG00000177954	1.89068626932863e-168	-1.10659	0.512	0.614	6.88171988310235e-164	RPS27
511	ENSG00000064651	2.56763204273871e-167	0.556501	0.573	0.34	9.34566710916037e-163	SLC12A2
512	ENSG00000187391	1.86090926709121e-166	0.385411	0.823	0.576	6.77333755035858e-162	MAGI2
513	ENSG00000231500	2.88479809095786e-166	-1.11229	0.539	0.639	1.05000880914684e-161	RPS18
514	ENSG00000131149	3.97141055271339e-166	-0.956811	0.529	0.622	1.44551401297662e-161	GSE1
515	ENSG00000111674	5.11713941392188e-166	0.735705	0.402	0.209	1.86253640387928e-161	ENO2
516	ENSG00000120725	1.09713964947996e-165	0.542884	0.688	0.456	3.99336889617715e-161	SIL1
517	ENSG00000138744	2.03340431648202e-164	1.73713	0.116	0.031	7.40118503113127e-160	NAAA
518	ENSG00000186952	3.27998607645409e-164	0.638807	0.476	0.268	1.19384933210776e-159	TMEM232
519	ENSG00000113645	4.1364565440966e-164	0.602052	0.557	0.334	1.50558745292028e-159	WWC1
520	ENSG00000075213	6.1491419739577e-164	0.346211	0.97	0.852	2.23816469568112e-159	SEMA3A
521	ENSG00000105193	9.15608701910897e-164	-1.04918	0.534	0.631	3.33263255321528e-159	RPS16
522	ENSG00000216937	1.47768843456369e-163	0.672035	0.379	0.193	5.37849036412491e-159	CCDC7
523	ENSG00000196975	2.04936994831475e-163	0.524056	0.614	0.373	7.45929673787604e-159	ANXA4
524	ENSG00000144868	6.1073368591626e-163	0.315582	0.993	0.936	2.222948469998e-158	TMEM108
525	ENSG00000157388	9.37892601401473e-163	1.38831	0.162	0.055	3.41374149058108e-158	CACNA1D
526	ENSG00000093072	1.53034298879163e-162	0.94771	0.236	0.098	5.57014241060378e-158	ADA2
527	ENSG00000144821	3.98530156314415e-162	2.43067	0.06	0.009	1.45057006295321e-157	MYH15
528	ENSG00000154122	4.28011430090104e-162	0.627362	0.505	0.293	1.55787600324196e-157	ANKH
529	ENSG00000021300	1.08057205868349e-161	0.759499	0.359	0.179	3.93306617919616e-157	PLEKHB1
530	ENSG00000115641	1.46348530909747e-161	1.724	0.106	0.027	5.32679382805296e-157	FHL2
531	ENSG00000135457	1.96518852287563e-161	0.5762	0.596	0.37	7.15289318556271e-157	TFCP2
532	ENSG00000183576	2.11667670245753e-161	0.569862	0.549	0.321	7.70427986160491e-157	SETD3
533	ENSG00000124766	2.75502098562091e-161	-0.706354	0.729	0.786	1.0027725383463e-156	SOX4
534	ENSG00000287100	2.95690794400353e-161	1.15095	0.186	0.068	1.07625535345841e-156
535	ENSG00000198938	5.81905602891569e-161	-1.13563	0.691	0.761	2.11802001340473e-156	MT-CO3
536	ENSG00000250722	8.4189738224128e-161	-2.99356	0.042	0.199	3.06433809188181e-156	SELENOP
537	ENSG00000171124	9.40950140963612e-161	3.25534	0.043	0.004	3.42487032307935e-156	FUT3
538	ENSG00000089057	2.22892833263055e-160	0.61181	0.622	0.397	8.11285334510867e-156	SLC23A2
539	ENSG00000164318	3.69959117924875e-160	0.328164	0.975	0.872	1.34657719742296e-155	EGFLAM
540	ENSG00000149273	3.91602474643296e-160	-1.00001	0.571	0.653	1.42535468720667e-155	RPS3
541	ENSG00000055163	5.42282073867991e-160	0.759926	0.338	0.166	1.97379829246471e-155	CYFIP2
542	ENSG00000033170	6.48095382460349e-160	0.561574	0.51	0.292	2.35893757307918e-155	FUT8
543	ENSG00000196935	7.23544088901185e-160	1.06168	0.245	0.106	2.63355577478253e-155	SRGAP1
544	ENSG00000134419	7.63600372452365e-160	-1.08618	0.513	0.613	2.77935263565212e-155	RPS15A
545	ENSG00000166441	1.61564831802063e-159	-1.0326	0.533	0.634	5.88063674793148e-155	RPL27A
546	ENSG00000136478	5.80954460844045e-159	0.554567	0.588	0.36	2.11455804658015e-154	TEX2
547	ENSG00000165704	6.29381568511776e-159	1.22739	0.184	0.068	2.29082303306916e-154	HPRT1
548	ENSG00000237773	1.06907566603621e-158	1.58521	0.12	0.034	3.8912216092386e-154
549	ENSG00000250567	2.35167615675863e-158	3.0758	0.046	0.005	8.55963087537006e-154
550	ENSG00000155903	2.57932504063223e-158	0.523247	0.707	0.478	9.3882272828932e-154	RASA2
551	ENSG00000112306	2.83340931060296e-158	-1.12149	0.534	0.629	1.03130432087326e-153	RPS12
552	ENSG00000172954	3.94345970722518e-158	0.530617	0.644	0.415	1.43534046423582e-153	LCLAT1
553	ENSG00000109475	1.21642543552345e-157	-1.00856	0.532	0.63	4.42754530021825e-153	RPL34
554	ENSG00000104324	2.01838720826229e-157	0.675398	0.35	0.175	7.34652576063307e-153	CPQ
555	ENSG00000103222	2.09931073985222e-157	0.65228	0.466	0.262	7.6410712309141e-153	ABCC1
556	ENSG00000072133	2.497789499578e-157	0.693723	0.326	0.157	9.09145422056402e-153	RPS6KA6
557	ENSG00000104218	3.16091055600803e-157	0.512132	0.633	0.397	1.1505082241758e-152	CSPP1
558	ENSG00000140332	6.49616578075877e-157	-1.65008	0.184	0.356	2.36447442088058e-152	TLE3
559	ENSG00000077232	8.5518743102754e-157	1.26006	0.172	0.062	3.11271121145404e-152	DNAJC10
560	ENSG00000260922	1.22752066970171e-156	1.31411	0.146	0.047	4.46792973358027e-152
561	ENSG00000184719	2.34740784655496e-156	0.889097	0.211	0.084	8.54409507989075e-152	RNLS
562	ENSG00000107099	3.37364618493767e-156	0.397212	0.916	0.732	1.22793973839361e-151	DOCK8
563	ENSG00000287925	1.50773442589519e-155	2.64937	0.052	0.007	5.48785176337333e-151
564	ENSG00000182899	5.15380956626061e-155	-1.07648	0.488	0.593	1.87588360592754e-150	RPL35A
565	ENSG00000286619	6.1607810145738e-155	1.76576	0.096	0.023	2.24240107368457e-150
566	ENSG00000152208	8.55351501384615e-155	-2.08093	0.119	0.292	3.11330839473972e-150	GRID2
567	ENSG00000110395	1.80781102929576e-154	0.784673	0.301	0.143	6.58007058443072e-150	CBL
568	ENSG00000163682	1.14535751368595e-153	-1.0486	0.533	0.626	4.16887227831411e-149	RPL9
569	ENSG00000265204	2.19238341811654e-153	2.13025	0.073	0.014	7.97983716526058e-149
570	ENSG00000182993	3.09957703920475e-153	0.987233	0.243	0.106	1.12818405072974e-148	C12orf60
571	ENSG00000143469	2.31651357563857e-152	0.438907	0.603	0.368	8.43164611260928e-148	SYT14
572	ENSG00000180357	2.51458171932361e-152	0.48612	0.773	0.558	9.15257454199407e-148	ZNF609
573	ENSG00000226009	3.38512872643422e-152	1.33533	0.148	0.049	1.23211915384753e-147	KCNIP2-AS1
574	ENSG00000072422	4.43974524786028e-152	0.595912	0.462	0.26	1.61597847531619e-147	RHOBTB1
575	ENSG00000168781	1.18245932871116e-151	1.22557	0.168	0.06	4.30391546464289e-147	PPIP5K1
576	ENSG00000172264	1.73683775697269e-151	0.343621	0.978	0.867	6.3217420678292e-147	MACROD2
577	ENSG00000243335	1.96344314461316e-151	0.882105	0.255	0.113	7.146540357763e-147	KCTD7
578	ENSG00000150510	2.76489598375656e-151	0.620143	0.444	0.246	1.00636684016771e-146	FAM124A
579	ENSG00000235984	3.80545985129093e-151	1.7482	0.088	0.02	1.38511127667287e-146	GPC5-AS1
580	ENSG00000101384	4.97557934023623e-151	1.12559	0.187	0.071	1.81101136825918e-146	JAG1
581	ENSG00000283380	5.00646356943649e-151	1.2718	0.136	0.043	1.82225261000349e-146
582	ENSG00000145592	1.6541339869351e-150	-1.20337	0.397	0.527	6.02071688564639e-146	RPL37
583	ENSG00000146416	7.62289612957774e-150	1.31321	0.163	0.059	2.77458173324371e-145	AIG1
584	ENSG00000276644	9.21920166761458e-150	-0.398698	0.99	0.981	3.35560502297836e-145	DACH1
585	ENSG00000148660	1.13441907441962e-149	0.557883	0.528	0.312	4.12905854707252e-145	CAMK2G
586	ENSG00000165566	3.37754095569667e-149	-0.827635	0.602	0.666	1.22935735705447e-144	AMER2
587	ENSG00000214050	4.34436569872413e-149	0.72691	0.351	0.18	1.58126222702161e-144	FBXO16
588	ENSG00000204767	4.66777344988341e-149	5.56052	0.026	0.001	1.69897618028856e-144	INSYN2B
589	ENSG00000164587	5.71911461543035e-149	-0.948863	0.578	0.661	2.08164333772434e-144	RPS14
590	ENSG00000287042	6.07983334618808e-149	1.49882	0.116	0.033	2.21293774134554e-144
591	ENSG00000120756	8.83045400744025e-149	1.18702	0.157	0.055	3.2141086496281e-144	PLS1
592	ENSG00000083097	2.93001599924525e-148	0.527061	0.578	0.355	1.06646722340528e-143	DOP1A
593	ENSG00000223795	4.20024626634877e-148	2.85495	0.043	0.005	1.52880563602562e-143
594	ENSG00000198755	6.94995893322961e-148	-1.08856	0.451	0.567	2.52964605251691e-143	RPL10A
595	ENSG00000122574	1.34762286685653e-147	1.40081	0.113	0.032	4.9050777107844e-143	WIPF3
596	ENSG00000231898	7.47961354078174e-147	1.65394	0.093	0.023	2.72242973657374e-142	MYO3B-AS1
597	ENSG00000155974	9.15426610657063e-147	-1.32925	0.36	0.516	3.33196977746958e-142	GRIP1
598	ENSG00000198727	1.26255353546382e-146	-1.2356	0.509	0.619	4.59544235838121e-142	MT-CYB
599	ENSG00000033327	2.0901529438894e-146	0.638188	0.342	0.174	7.60773868516863e-142	GAB2
600	ENSG00000169439	4.11890110658865e-146	0.533871	0.513	0.303	1.49919762477614e-141	SDC2
601	ENSG00000137486	1.1196979554963e-145	0.965289	0.217	0.091	4.07547661841542e-141	ARRB1
602	ENSG00000144713	2.96070301780432e-145	-1.04643	0.541	0.629	1.07763668442042e-140	RPL32
603	ENSG00000080224	3.76580117385841e-145	1.73639	0.125	0.039	1.37067631126099e-140	EPHA6
604	ENSG00000133256	5.62795635518643e-145	0.521103	0.661	0.437	2.04846355416076e-140	PDE6B
605	ENSG00000112902	1.03923693508639e-144	-2.24138	0.098	0.259	3.78261459632743e-140	SEMA5A
606	ENSG00000150471	1.42680753124523e-144	-0.993708	0.549	0.655	5.19329405222639e-140	ADGRL3
607	ENSG00000134243	5.13533616541811e-144	0.778089	0.298	0.145	1.86915965748888e-139	SORT1
608	ENSG00000184828	1.27482004957896e-143	0.575904	0.444	0.251	4.6400900164575e-139	ZBTB7C
609	ENSG00000140943	1.30459796098327e-143	0.607852	0.619	0.406	4.74847565838691e-139	MBTPS1
610	ENSG00000170873	1.88982803808754e-143	0.539035	0.534	0.321	6.87859609303103e-139	MTSS1
611	ENSG00000198918	2.76335469775507e-143	-1.25186	0.368	0.5	1.00580584288889e-138	RPL39
612	ENSG00000122591	3.7778465303967e-143	1.13073	0.174	0.066	1.37506058013379e-138	HYCC1
613	ENSG00000266378	3.86660685993955e-143	0.881291	0.239	0.105	1.4073675648808e-138
614	ENSG00000196588	6.78885106338718e-143	0.496882	0.58	0.361	2.47100601005167e-138	MRTFA
615	ENSG00000136854	1.01987205216662e-142	0.553127	0.667	0.455	3.71213029547605e-138	STXBP1
616	ENSG00000151474	1.24034635001176e-142	-1.0688	0.399	0.543	4.51461264477282e-138	FRMD4A
617	ENSG00000067057	1.77150666217872e-142	1.8069	0.089	0.022	6.4479299489981e-138	PFKP
618	ENSG00000079156	2.94464712005461e-142	1.04716	0.171	0.064	1.07179265875748e-137	OSBPL6
619	ENSG00000134709	3.36024211855594e-142	0.881131	0.237	0.104	1.22306092631199e-137	HOOK1
620	ENSG00000187837	4.72011449829446e-142	-1.21953	0.366	0.492	1.71802727508922e-137	H1-2
621	ENSG00000245937	5.00552975869743e-142	0.652912	0.33	0.167	1.82191272157069e-137	SLC12A2-DT
622	ENSG00000198919	5.1738123874922e-142	0.604121	0.411	0.225	1.88316423279941e-137	DZIP3
623	ENSG00000171858	7.41665048725642e-142	-1.24283	0.343	0.479	2.69951244435159e-137	RPS21
624	ENSG00000139946	2.30780290122276e-141	0.50752	0.473	0.272	8.39994099987059e-137	PELI2
625	ENSG00000092931	5.91138983665408e-141	0.537209	0.587	0.374	2.15162767274535e-136	MFSD11
626	ENSG00000261460	7.13085641193247e-141	0.682596	0.412	0.23	2.59548911681518e-136
627	ENSG00000127472	7.81426003781282e-141	3.19292	0.039	0.004	2.84423436856311e-136	PLA2G5
628	ENSG00000160584	7.84422031356449e-141	0.35858	0.922	0.765	2.8551393097312e-136	SIK3
629	ENSG00000115268	9.22818908574603e-141	-1.04324	0.534	0.618	3.35887626342984e-136	RPS15
630	ENSG00000103460	1.80585996235459e-140	-1.86474	0.157	0.316	6.57296909097825e-136	TOX3
631	ENSG00000198242	5.83903785882804e-140	-1.08943	0.454	0.562	2.12529299985623e-135	RPL23A
632	ENSG00000152359	6.69193331768989e-140	0.901449	0.22	0.094	2.43572988897276e-135	POC5
633	ENSG00000161791	1.19626793521736e-139	0.987719	0.214	0.091	4.35417603060415e-135	FMNL3
634	ENSG00000130413	5.01553469934854e-139	0.423812	0.706	0.483	1.82555431986888e-134	STK33
635	ENSG00000247675	9.57769045431894e-139	1.33774	0.138	0.046	3.48608777156301e-134	LRP4-AS1
636	ENSG00000080823	1.20360665769578e-138	0.485439	0.687	0.464	4.38088751268111e-134	MOK
637	ENSG00000142655	2.67486891276879e-138	0.616781	0.428	0.242	9.73598786869585e-134	PEX14
638	ENSG00000051382	3.13826558052147e-138	0.61262	0.373	0.2	1.1422659059982e-133	PIK3CB
639	ENSG00000232053	3.94664233928441e-138	2.87398	0.045	0.005	1.43649887865274e-133
640	ENSG00000253766	5.99691194347086e-138	0.983735	0.152	0.054	2.18275600918453e-133
641	ENSG00000142937	1.72785205316126e-137	-0.990616	0.573	0.65	6.28903590309636e-133	RPS8
642	ENSG00000265485	1.73868731160444e-137	-4.15992	0.015	0.143	6.32847407677786e-133	LINC01915
643	ENSG00000157216	2.41010935269655e-137	-1.17499	0.382	0.504	8.77231602194489e-133	SSBP3
644	ENSG00000246477	3.59012796128269e-137	1.19377	0.153	0.055	1.30673477534767e-132
645	ENSG00000096384	3.62739708626965e-137	-0.99872	0.412	0.533	1.32029999146043e-132	HSP90AB1
646	ENSG00000163788	6.96909315832074e-137	0.524822	0.499	0.296	2.53661052776558e-132	SNRK
647	ENSG00000065325	1.07670103581602e-136	0.964187	0.215	0.092	3.91897643016314e-132	GLP2R
648	ENSG00000075711	1.09618915378878e-136	0.364202	0.917	0.739	3.98990928196039e-132	DLG1
649	ENSG00000070731	1.35978351293118e-136	1.42133	0.099	0.027	4.94934003036692e-132	ST6GALNAC2
650	ENSG00000150627	3.58486103625482e-136	0.495182	0.522	0.319	1.30481771997603e-131	WDR17
651	ENSG00000197147	5.91138835131989e-136	0.777035	0.262	0.123	2.15162713211341e-131	LRRC8B
652	ENSG00000122026	8.02970472398893e-136	-0.995609	0.526	0.613	2.92265192543749e-131	RPL21
653	ENSG00000205726	1.73238971625384e-135	0.289941	0.979	0.904	6.30555208922073e-131	ITSN1
654	ENSG00000148303	2.15690746666567e-135	-0.976532	0.539	0.622	7.8507117971697e-131	RPL7A
655	ENSG00000172493	2.35564615153098e-135	0.484302	0.699	0.486	8.57408086234247e-131	AFF1
656	ENSG00000065621	2.61761689901984e-135	2.53708	0.054	0.009	9.52760198905241e-131	GSTO2
657	ENSG00000138449	6.180134850968e-135	0.52685	0.62	0.408	2.24944548305533e-130	SLC40A1
658	ENSG00000164742	7.72435399396403e-135	0.603657	0.455	0.266	2.81151036672303e-130	ADCY1
659	ENSG00000006432	7.77612215811258e-135	1.26663	0.136	0.046	2.83035294310982e-130	MAP3K9
660	ENSG00000119899	9.31841195801704e-135	0.497844	0.496	0.294	3.39171558447904e-130	SLC17A5
661	ENSG00000114115	1.55175241295464e-134	-1.97731	0.114	0.268	5.6480684326723e-130	RBP1
662	ENSG00000081052	1.80945182029519e-134	2.08833	0.07	0.015	6.58604273551044e-130	COL4A4
663	ENSG00000091622	3.33831985318392e-134	1.57387	0.101	0.028	1.21508166016188e-129	PITPNM3
664	ENSG00000164190	4.89054496582815e-134	-0.467356	0.913	0.901	1.78006055666213e-129	NIPBL
665	ENSG00000135549	2.13002514447727e-133	1.14379	0.149	0.054	7.75286552086835e-129	PKIB
666	ENSG00000149443	2.38252005937016e-133	2.29503	0.057	0.01	8.67189651209552e-129	SCP2D1-AS1
667	ENSG00000165323	4.2921732077872e-133	-2.25226	0.1	0.251	1.56226520417039e-128	FAT3
668	ENSG00000237499	5.0069689999138e-133	1.02497	0.191	0.079	1.82243657658863e-128	WAKMAR2
669	ENSG00000064687	8.26386335977343e-133	0.727756	0.355	0.19	3.00788098569033e-128	ABCA7
670	ENSG00000233620	8.39355340263153e-133	0.879573	0.21	0.09	3.05508556748982e-128	USH2A-AS2
671	ENSG00000197977	1.18649158101484e-132	0.660232	0.359	0.193	4.31859205657782e-128	ELOVL2
672	ENSG00000287708	1.80738746937674e-132	-2.01186	0.128	0.281	6.57852891103747e-128
673	ENSG00000158555	1.65164532809898e-131	0.781152	0.284	0.139	6.01165866521466e-127	GDPD5
674	ENSG00000142046	2.44872520835785e-131	-1.29154	0.274	0.419	8.91287001338089e-127	TMEM91
675	ENSG00000186153	2.48168116284399e-131	0.415011	0.715	0.505	9.03282309651954e-127	WWOX
676	ENSG00000172175	4.99182624635761e-131	0.513833	0.532	0.328	1.81692491714924e-126	MALT1
677	ENSG00000237877	5.73623741362087e-131	0.512545	0.368	0.2	2.08787569380972e-126	LINC01473
678	ENSG00000063177	7.53481039772251e-131	-0.929707	0.552	0.627	2.74252028856304e-126	RPL18
679	ENSG00000285639	1.60980824214331e-130	1.05125	0.18	0.072	5.85938003975321e-126
680	ENSG00000140743	1.92557757772396e-130	0.837549	0.207	0.089	7.00871726739966e-126	CDR2
681	ENSG00000139921	3.31931517156737e-130	-1.12407	0.445	0.539	1.20816433614709e-125	TMX1
682	ENSG00000109689	5.09222245505564e-130	0.52817	0.408	0.228	1.85346712919115e-125	STIM2
683	ENSG00000251321	6.64222671431298e-130	1.28875	0.095	0.026	2.41763767947564e-125	PCAT4
684	ENSG00000213741	6.93625082823502e-130	-0.924592	0.573	0.645	2.52465657646098e-125	RPS29
685	ENSG00000075151	1.06124197334559e-129	0.41909	0.747	0.534	3.86270853458329e-125	EIF4G3
686	ENSG00000170889	1.12879756539705e-129	-0.997193	0.492	0.587	4.10859737853217e-125	RPS9
687	ENSG00000111785	6.3242837846332e-129	0.852587	0.262	0.127	2.30191281193079e-124	RIC8B
688	ENSG00000133639	1.12863581749464e-128	-1.15646	0.342	0.472	4.108008648517e-124	BTG1
689	ENSG00000253184	3.12039158439419e-128	0.657789	0.27	0.13	1.1357601288878e-123
690	ENSG00000196632	3.64154652269451e-128	0.736409	0.293	0.148	1.32545010333035e-123	WNK3
691	ENSG00000137154	4.19960106121675e-128	-1.0523	0.504	0.589	1.52857079426167e-123	RPS6
692	ENSG00000232590	5.41798814106775e-128	-2.47499	0.049	0.186	1.97203932358584e-123
693	ENSG00000151320	6.22928497685383e-128	0.592768	0.337	0.178	2.26733514587526e-123	AKAP6
694	ENSG00000131089	1.22359116622041e-127	0.492447	0.549	0.343	4.45362712680906e-123	ARHGEF9
695	ENSG00000158445	1.5911473944363e-127	0.574651	0.456	0.269	5.79145828626925e-123	KCNB1
696	ENSG00000049192	2.47400225859935e-127	0.557831	0.361	0.196	9.00487342084992e-123	ADAMTS6
697	ENSG00000106780	3.09072694847524e-127	0.531686	0.517	0.322	1.12496279470602e-122	MEGF9
698	ENSG00000090975	4.00126243168765e-127	1.18238	0.143	0.052	1.45637949988567e-122	PITPNM2
699	ENSG00000162992	4.26498978422786e-127	-0.77767	0.612	0.666	1.55237098166326e-122	NEUROD1
700	ENSG00000214140	5.30654036213564e-127	0.776782	0.219	0.097	1.93147456101013e-122	PRCD
701	ENSG00000089159	9.80313786750214e-127	0.803494	0.246	0.115	3.56814612101343e-122	PXN
702	ENSG00000114391	1.24096114698645e-126	-0.899804	0.547	0.625	4.51685038280129e-122	RPL24
703	ENSG00000233355	1.39725633491567e-126	1.22244	0.127	0.043	5.08573360782606e-122	CHRM3-AS2
704	ENSG00000147202	1.80942881710388e-126	0.572271	0.376	0.208	6.5859590084947e-122	DIAPH2
705	ENSG00000138639	2.89191451569466e-126	0.238691	0.785	0.531	1.05259904542254e-121	ARHGAP24
706	ENSG00000070601	3.33171767878054e-126	0.456297	0.76	0.556	1.21267860072254e-121	FRMPD1
707	ENSG00000111371	4.67648693207552e-126	1.10056	0.17	0.068	1.70214771353685e-121	SLC38A1
708	ENSG00000257165	6.44848209956188e-126	4.62468	0.024	0.001	2.34711851459853e-121
709	ENSG00000110777	6.60820149541012e-126	2.93897	0.041	0.005	2.40525318029937e-121	POU2AF1
710	ENSG00000167083	1.20354950153421e-125	0.564486	0.439	0.256	4.38067947568421e-121	GNGT2
711	ENSG00000185261	1.58287117313821e-125	0.390916	0.801	0.598	5.76133449598844e-121	KIAA0825
712	ENSG00000262075	1.85014739124247e-125	1.55625	0.09	0.024	6.73416647464435e-121	DKFZP434A062
713	ENSG00000241111	1.92982763254062e-125	-2.34986	0.109	0.25	7.02418661692134e-121	PRICKLE2-AS1
714	ENSG00000105784	2.37575676814877e-125	0.569896	0.301	0.152	8.64727948470791e-121	RUNDC3B
715	ENSG00000261617	2.80990311950745e-125	0.640349	0.328	0.171	1.02274853743832e-120	LINC02177
716	ENSG00000138738	4.08723493222711e-125	0.900258	0.174	0.07	1.48767177063202e-120	PRDM5
717	ENSG00000125899	1.148039506697e-124	2.06632	0.056	0.01	4.17863419647575e-120	LINC02871
718	ENSG00000134438	2.25312137286557e-124	-2.09575	0.087	0.229	8.20091117295611e-120	RAX
719	ENSG00000012232	3.07241579337741e-124	0.614018	0.39	0.22	1.11829790047351e-119	EXTL3
720	ENSG00000047849	3.92436892355181e-124	0.495363	0.582	0.377	1.42839180079439e-119	MAP4
721	ENSG00000086189	5.36274000270053e-124	0.760626	0.264	0.129	1.95193010618294e-119	DIMT1
722	ENSG00000008988	5.96363827165403e-124	-1.09013	0.438	0.538	2.17064505811663e-119	RPS20
723	ENSG00000123307	6.11241165139396e-124	-1.20557	0.325	0.452	2.22479559287437e-119	NEUROD4
724	ENSG00000142949	1.00036717553175e-123	-1.20641	0.305	0.437	3.64113644550048e-119	PTPRF
725	ENSG00000153944	1.54683972261482e-123	0.333189	0.931	0.806	5.63018722237344e-119	MSI2
726	ENSG00000257458	1.79260631444555e-123	1.30332	0.111	0.035	6.5247284633189e-119
727	ENSG00000231424	2.8633720231746e-123	-3.09625	0.037	0.166	1.04221014899509e-118
728	ENSG00000128567	2.9681988610919e-123	0.821972	0.221	0.1	1.08036502146023e-118	PODXL
729	ENSG00000196569	3.15263773061586e-123	0.410848	0.729	0.525	1.14749708118956e-118	LAMA2
730	ENSG00000171303	3.35937781468485e-123	-1.88045	0.107	0.253	1.22274633698899e-118	KCNK3
731	ENSG00000152894	3.82619362726295e-123	-1.23418	0.318	0.457	1.39265795645117e-118	PTPRK
732	ENSG00000285679	4.91532649858152e-123	0.741869	0.211	0.094	1.7890805389537e-118
733	ENSG00000198796	7.43818010073448e-123	2.43386	0.047	0.007	2.70734879306534e-118	ALPK2
734	ENSG00000144820	7.69856276407486e-123	0.811655	0.174	0.07	2.80212287486797e-118	ADGRG7
735	ENSG00000225885	3.33138205246709e-122	0.753522	0.212	0.094	1.21255643945697e-117
736	ENSG00000153902	3.74608375745803e-122	-2.91597	0.033	0.159	1.36349956603957e-117	LGI4
737	ENSG00000237844	1.23227162333573e-121	1.81887	0.084	0.022	4.4852222546174e-117
738	ENSG00000286693	1.60119865387688e-121	1.92844	0.063	0.013	5.82804286038108e-117
739	ENSG00000224822	2.68373653762372e-121	2.40793	0.048	0.008	9.76826424964282e-117	THRB-IT1
740	ENSG00000230831	2.8895904521268e-121	1.01744	0.157	0.061	1.05175313276511e-116
741	ENSG00000135049	5.01032285528951e-121	0.399902	0.736	0.524	1.82365731286828e-116	AGTPBP1
742	ENSG00000076554	8.99803044819218e-121	0.390985	0.701	0.474	3.27510312253299e-116	TPD52
743	ENSG00000076554	8.99803044819218e-121	0.390985	0.701	0.474	3.27510312253299e-116	TPD52
744	ENSG00000113262	1.34919958909713e-120	-1.73774	0.128	0.274	4.91081666439572e-116	GRM6
745	ENSG00000099256	3.41351286390633e-120	0.66466	0.311	0.164	1.24245041220463e-115	PRTFDC1
746	ENSG00000203585	4.66016327504156e-120	1.08977	0.145	0.054	1.69620622884963e-115	LINC02408
747	ENSG00000245864	5.15791480085915e-120	1.07808	0.188	0.081	1.87737782921671e-115	MEF2C-AS2
748	ENSG00000164114	1.03764900729987e-119	0.716192	0.262	0.129	3.77683485677007e-115	MAP9
749	ENSG00000197119	2.8703885275083e-119	0.558861	0.394	0.223	1.04476401624247e-114	SLC25A29
750	ENSG00000118733	3.36102042084992e-119	0.705196	0.255	0.125	1.22334421278096e-114	OLFM3
751	ENSG00000177640	3.84143656768561e-119	0.961809	0.162	0.064	1.39820608190621e-114	CASC2
752	ENSG00000175130	4.88806815300696e-119	-1.57425	0.167	0.311	1.77915904633147e-114	MARCKSL1
753	ENSG00000173926	4.89193427008994e-119	0.535564	0.396	0.228	1.78056623562734e-114	MARCHF3
754	ENSG00000138376	5.0020998988815e-119	0.409009	0.598	0.383	1.82066432119489e-114	BARD1
755	ENSG00000047579	5.17810115492937e-119	0.89069	0.166	0.067	1.88472525837119e-114	DTNBP1
756	ENSG00000116044	8.03814572529857e-119	0.737429	0.332	0.181	2.92572428109417e-114	NFE2L2
757	ENSG00000114948	1.21102587164795e-118	0.9057	0.162	0.065	4.4078919676242e-114	ADAM23
758	ENSG00000265681	2.4578429641958e-118	-1.0409	0.492	0.575	8.94605682107987e-114	RPL17
759	ENSG00000053254	3.59988035493924e-118	-1.77795	0.141	0.284	1.31028445159078e-113	FOXN3
760	ENSG00000228412	5.33442861689349e-118	1.6266	0.092	0.027	1.94162532797689e-113	LNC-LBCS
761	ENSG00000287092	6.74240284820611e-118	1.01958	0.169	0.07	2.45409978869006e-113
762	ENSG00000157036	6.98184939648644e-118	0.834503	0.202	0.089	2.54125354333314e-113	EXOG
763	ENSG00000213965	1.08069987979368e-117	1.45674	0.093	0.027	3.93353142247305e-113	NUDT19
764	ENSG00000119862	1.34567369210608e-117	1.10855	0.14	0.052	4.89798310452773e-113	LGALSL
765	ENSG00000168769	1.61498064395185e-117	0.442147	0.478	0.288	5.87820654785594e-113	TET2
766	ENSG00000103723	1.75895223661231e-117	0.77121	0.256	0.126	6.40223435082148e-113	AP3B2
767	ENSG00000065609	3.10689050314856e-117	0.390418	0.713	0.507	1.13084600533601e-112	SNAP91
768	ENSG00000139112	3.22341831055109e-117	0.707745	0.27	0.135	1.17325979667439e-112	GABARAPL1
769	ENSG00000115159	5.55217968354432e-117	0.50284	0.376	0.211	2.02088236121646e-112	GPD2
770	ENSG00000120049	7.94104205460529e-117	1.34301	0.103	0.032	2.89038048703523e-112	KCNIP2
771	ENSG00000107077	1.41437950876946e-116	0.363649	0.761	0.548	5.14805853601907e-112	KDM4C
772	ENSG00000171174	2.09696361408714e-116	0.738807	0.215	0.099	7.63252816255437e-112	RBKS
773	ENSG00000135074	2.56616044913361e-116	0.445863	0.597	0.391	9.34031080275653e-112	ADAM19
774	ENSG00000105954	3.53421514754832e-116	1.50434	0.086	0.024	1.28638362940464e-111	NPVF
775	ENSG00000133818	3.67452004350311e-116	0.626019	0.298	0.155	1.33745180543426e-111	RRAS2
776	ENSG00000250407	4.02799862048275e-116	1.61437	0.077	0.02	1.46611093788331e-111
777	ENSG00000106785	4.5440242137634e-116	1.79575	0.07	0.016	1.6539339333256e-111	TRIM14
778	ENSG00000107862	6.05563251440842e-116	0.404659	0.626	0.417	2.20412912259438e-111	GBF1
779	ENSG00000283154	1.03650016045578e-115	-5.86901	0.02	0.132	3.77265328402694e-111	IQCJ-SCHIP1
780	ENSG00000283154	1.03650016045578e-115	-5.86901	0.02	0.132	3.77265328402694e-111	IQCJ-SCHIP1
781	ENSG00000110700	1.41140923572735e-115	-0.950978	0.544	0.615	5.1372473362004e-111	RPS13
782	ENSG00000186472	1.83148081514855e-115	0.339577	0.784	0.568	6.66622387097767e-111	PCLO
783	ENSG00000165868	2.35039680159835e-115	1.26996	0.128	0.046	8.55497427845768e-111	HSPA12A
784	ENSG00000172350	3.56984623149867e-115	0.908451	0.169	0.069	1.29935263134089e-110	ABCG4
785	ENSG00000161970	3.925358742793e-115	-1.04316	0.49	0.568	1.4287520752018e-110	RPL26
786	ENSG00000103599	7.81750490632004e-115	0.708225	0.247	0.121	2.84541543580237e-110	IQCH
787	ENSG00000259964	8.84456115127356e-115	2.16895	0.06	0.012	3.21924336784055e-110	THSD4-AS1
788	ENSG00000111252	1.49048128817214e-114	1.56965	0.083	0.023	5.42505379268896e-110	SH2B3
789	ENSG00000198929	1.63483761864277e-114	0.703267	0.249	0.122	5.95048196433596e-110	NOS1AP
790	ENSG00000112699	2.56961437410045e-114	0.409125	0.46	0.276	9.35288239885082e-110	GMDS
791	ENSG00000132849	5.77801781800126e-114	0.510493	0.394	0.227	2.1030829253961e-109	PATJ
792	ENSG00000232682	1.02539098994995e-113	1.74455	0.068	0.016	3.73221812521984e-109
793	ENSG00000165983	1.92855198765598e-113	1.15	0.112	0.037	7.01954352467023e-109	PTER
794	ENSG00000236432	4.05331797469821e-113	1.244	0.101	0.031	1.47532667643065e-108	MFF-DT
795	ENSG00000149972	4.62346056056135e-113	-5.31565	0.014	0.121	1.68284717483312e-108	CNTN5
796	ENSG00000125691	6.99835608601372e-113	-0.98996	0.487	0.572	2.54726164818727e-108	RPL23
797	ENSG00000144451	7.99791764288408e-113	0.473063	0.56	0.372	2.91108206365695e-108	SPAG16
798	ENSG00000152767	1.00924453987922e-112	0.420501	0.693	0.489	3.67344827625239e-108	FARP1
799	ENSG00000109685	1.09394298536867e-112	0.463283	0.546	0.352	3.98173367814487e-108	NSD2
800	ENSG00000181751	1.99614300392038e-112	0.898243	0.187	0.082	7.26556130566939e-108	MACIR
801	ENSG00000107362	4.61068507577431e-112	0.660874	0.299	0.159	1.67819715388033e-107	ABHD17B
802	ENSG00000173706	4.66599542924473e-112	1.09371	0.138	0.052	1.6983290163365e-107	HEG1
803	ENSG00000154978	8.24247404675728e-112	0.401015	0.659	0.448	3.00009570353872e-107	VOPP1
804	ENSG00000147655	1.10275009274913e-111	-2.19983	0.103	0.238	4.01378978758829e-107	RSPO2
805	ENSG00000164506	1.38488906044391e-111	0.36166	0.67	0.458	5.04071920220374e-107	STXBP5
806	ENSG00000145632	3.69362547652292e-111	1.53204	0.077	0.02	1.34440580094481e-106	PLK2
807	ENSG00000058453	4.15689479855986e-111	0.509967	0.461	0.28	1.51302656877982e-106	CROCC
808	ENSG00000170264	4.49455958663509e-111	0.321045	0.911	0.78	1.63592979834344e-106	FAM161A
809	ENSG00000149328	5.05485500841923e-111	1.53717	0.077	0.02	1.83986612596443e-106	GLB1L2
810	ENSG00000186073	7.91328644577298e-111	0.442406	0.459	0.278	2.88027800053245e-106	CDIN1
811	ENSG00000112981	1.06110602294554e-110	0.96273	0.162	0.067	3.86221370231716e-106	NME5
812	ENSG00000164142	1.22800858282469e-110	0.44172	0.457	0.279	4.46970563976532e-106	FHIP1A
813	ENSG00000187123	1.34733590739519e-110	1.16997	0.116	0.04	4.90403323573702e-106	LYPD6
814	ENSG00000047648	1.62252613168338e-110	1.26758	0.114	0.039	5.90567061410115e-106	ARHGAP6
815	ENSG00000152518	1.94417552834228e-110	-2.79917	0.041	0.159	7.07641008806024e-106	ZFP36L2
816	ENSG00000129244	1.96471662193977e-110	-0.635462	0.643	0.69	7.15117556053637e-106	ATP1B2
817	ENSG00000181722	3.58554559720734e-110	-0.482162	0.875	0.882	1.30506688647153e-105	ZBTB20
818	ENSG00000244383	4.10355200711784e-110	0.840525	0.203	0.093	1.49361085955075e-105	FAM3D-AS1
819	ENSG00000080824	4.54827059657231e-110	-0.59425	0.711	0.747	1.65547953174039e-105	HSP90AA1
820	ENSG00000169554	8.32211682165484e-110	-1.19476	0.344	0.467	3.02908408074593e-105	ZEB2
821	ENSG00000267476	8.63876867985575e-110	0.584253	0.307	0.163	3.1443390240939e-105
822	ENSG00000087274	1.48193094284968e-109	0.453604	0.618	0.419	5.39393224578428e-105	ADD1
823	ENSG00000142192	1.68365290877597e-109	0.427069	0.607	0.41	6.12815985736276e-105	APP
824	ENSG00000206535	2.15488338149124e-109	0.75637	0.211	0.098	7.84334453195181e-105	LNP1
825	ENSG00000227028	4.70074293155045e-109	0.458311	0.373	0.212	1.71097641222573e-104	SLC8A1-AS1
826	ENSG00000048740	7.48449494597187e-109	0.263497	0.972	0.892	2.72420647043484e-104	CELF2
827	ENSG00000123106	1.77554196544918e-108	0.337767	0.774	0.571	6.46261764584194e-104	CCDC91
828	ENSG00000188229	2.11372823911645e-108	-0.885551	0.451	0.551	7.69354804473607e-104	TUBB4B
829	ENSG00000163116	2.42530181633623e-108	0.643485	0.251	0.126	8.82761355110063e-104	STPG2
830	ENSG00000259520	2.51999159747451e-108	1.287	0.094	0.029	9.17226541648773e-104	SLC28A2-AS1
831	ENSG00000167632	3.3669563344838e-108	0.386159	0.636	0.43	1.22550476662542e-103	TRAPPC9
832	ENSG00000132676	4.35249402861724e-108	0.469745	0.394	0.229	1.5842207765361e-103	DAP3
833	ENSG00000123240	8.04957885937235e-108	0.81808	0.194	0.088	2.92988571323435e-103	OPTN
834	ENSG00000166527	1.06682298264015e-107	3.4087	0.028	0.002	3.88302229221361e-103	CLEC4D
835	ENSG00000239572	1.4392005597775e-107	-3.94409	0.018	0.123	5.23840219747816e-103
836	ENSG00000245910	1.61174056589557e-107	-1.01124	0.405	0.503	5.86641331174671e-103	SNHG6
837	ENSG00000161714	2.29458799495668e-107	1.2434	0.111	0.038	8.35184138404333e-103	PLCD3
838	ENSG00000137766	3.03597832645228e-107	0.257151	0.769	0.541	1.1050353912621e-102	UNC13C
839	ENSG00000125378	4.04939745389036e-107	2.94285	0.036	0.005	1.47389968526701e-102	BMP4
840	ENSG00000163873	4.85972856227704e-107	-1.14479	0.295	0.428	1.7688440020976e-102	GRIK3
841	ENSG00000154917	5.69480232233055e-107	1.57927	0.083	0.024	2.07279414928187e-102	RAB6B
842	ENSG00000259481	9.50140946487425e-107	0.501732	0.408	0.24	3.45832301702493e-102
843	ENSG00000104611	1.00025836783686e-106	1.59088	0.078	0.022	3.64074040725261e-102	SH2D4A
844	ENSG00000113594	1.60600906638576e-106	0.754152	0.194	0.088	5.84555179983087e-102	LIFR
845	ENSG00000233927	1.9795229886701e-106	-0.966413	0.463	0.55	7.20506777416143e-102	RPS28
846	ENSG00000124440	2.59146479973936e-106	-2.55636	0.038	0.154	9.4324135780913e-102	HIF3A
847	ENSG00000141576	3.20607152511379e-106	0.594257	0.295	0.157	1.16694591371092e-101	RNF157
848	ENSG00000081277	3.43842547176564e-106	0.783773	0.196	0.089	1.25151810321326e-101	PKP1
849	ENSG00000224897	1.15790052377412e-105	0.455736	0.365	0.209	4.21452632643305e-101	POT1-AS1
850	ENSG00000224897	1.15790052377412e-105	0.455736	0.365	0.209	4.21452632643305e-101	POT1-AS1
851	ENSG00000064393	2.19699539179126e-105	0.37375	0.696	0.491	7.99662382704183e-101	HIPK2
852	ENSG00000069943	2.59723324210609e-105	0.762841	0.216	0.103	9.45340955461775e-101	PIGB
853	ENSG00000166908	2.97210368884034e-105	1.04856	0.136	0.053	1.08178630066411e-100	PIP4K2C
854	ENSG00000182774	5.28125909734263e-105	-1.15009	0.368	0.474	1.92227268625077e-100	RPS17
855	ENSG00000285780	6.04892737070432e-105	1.43101	0.082	0.023	2.20168858438896e-100
856	ENSG00000140443	7.55645526717211e-105	-0.478455	0.862	0.858	2.7503985881453e-100	IGF1R
857	ENSG00000183696	9.89365742180167e-105	1.3118	0.102	0.034	3.60109342838737e-100	UPP1
858	ENSG00000088854	1.29595807018848e-104	0.411418	0.526	0.334	4.71702818387203e-100	DNAAF9
859	ENSG00000159267	3.25553533696581e-104	0.42793	0.392	0.229	1.18494975194882e-99	HLCS
860	ENSG00000235706	5.91793074727344e-104	0.724044	0.237	0.118	2.15400843339259e-99	DICER1-AS1
861	ENSG00000086015	1.05192454301053e-103	0.545277	0.336	0.19	3.82879495164972e-99	MAST2
862	ENSG00000171316	1.42494406811353e-103	-0.384813	0.926	0.908	5.18651141911962e-99	CHD7
863	ENSG00000254772	1.82441736916735e-103	-1.12271	0.395	0.491	6.64051434029531e-99	EEF1G
864	ENSG00000096093	1.88571678381015e-103	0.394829	0.573	0.375	6.86363194971218e-99	EFHC1
865	ENSG00000179833	2.0203031542724e-103	0.500256	0.34	0.192	7.35349942092069e-99	SERTAD2
866	ENSG00000171435	3.95861536328355e-103	1.09006	0.128	0.049	1.44085681992795e-98	KSR2
867	ENSG00000087470	4.33120900136727e-103	0.392325	0.627	0.425	1.57647345231766e-98	DNM1L
868	ENSG00000260037	4.37429247708794e-103	0.41641	0.684	0.489	1.59215497581047e-98
869	ENSG00000146243	4.81834821764613e-103	0.418413	0.541	0.353	1.75378238425884e-98	IRAK1BP1
870	ENSG00000058063	6.69204463045053e-103	0.403164	0.521	0.334	2.43577040459138e-98	ATP11B
871	ENSG00000153234	3.75962889273838e-102	1.26293	0.093	0.029	1.36842972437891e-97	NR4A2
872	ENSG00000241832	4.47751913462053e-102	0.964253	0.143	0.057	1.62972741461918e-97	CECR3
873	ENSG00000167612	5.01313972789578e-102	1.04523	0.115	0.041	1.82468259815951e-97	ANKRD33
874	ENSG00000177311	5.42443054122599e-102	0.740127	0.21	0.101	1.97438422839544e-97	ZBTB38
875	ENSG00000178031	6.51745274440384e-102	1.9947	0.057	0.013	2.37222244990811e-97	ADAMTSL1
876	ENSG00000121310	7.84605781938771e-102	0.464563	0.403	0.238	2.85580812510074e-97	ECHDC2
877	ENSG00000115993	8.66344113274361e-102	0.361571	0.618	0.413	3.15331930349602e-97	TRAK2
878	ENSG00000198740	8.68118683166718e-102	0.448406	0.428	0.26	3.15977838299022e-97	ZNF652
879	ENSG00000083845	9.48061825599497e-102	-1.04944	0.401	0.496	3.45075543281705e-97	RPS5
880	ENSG00000253406	1.21320731089035e-101	2.27613	0.043	0.007	4.4158319701787e-97
881	ENSG00000135333	1.60206369928805e-101	-3.17188	0.039	0.15	5.83119145266863e-97	EPHA7
882	ENSG00000005700	1.67653057801775e-101	0.412216	0.455	0.281	6.10223599786902e-97	IBTK
883	ENSG00000233729	1.89711793709557e-101	0.781458	0.2	0.094	6.90512986744047e-97	NCKAP5-AS1
884	ENSG00000198712	3.81816430272729e-101	-1.07527	0.604	0.667	1.38973544290668e-96	MT-CO2
885	ENSG00000137877	4.18950498007148e-101	1.58885	0.072	0.019	1.52489602264642e-96	SPTBN5
886	ENSG00000286886	7.69984773338151e-101	0.805087	0.16	0.068	2.8025905779962e-96
887	ENSG00000179218	8.63408670248295e-101	-1.3538	0.188	0.32	3.14263487796974e-96	CALR
888	ENSG00000168300	1.31716179495256e-100	-1.46236	0.178	0.308	4.79420550126833e-96	PCMTD1
889	ENSG00000287097	1.78542814057407e-100	1.68417	0.057	0.013	6.4986013460615e-96
890	ENSG00000184613	3.91483496682818e-100	0.308858	0.807	0.619	1.42492163122612e-95	NELL2
891	ENSG00000126091	4.46056899669756e-100	0.397119	0.721	0.53	1.62355790341798e-95	ST3GAL3
892	ENSG00000153933	4.84173807294793e-100	0.698617	0.211	0.101	1.76229582379159e-95	DGKE
893	ENSG00000136379	8.95014671084198e-100	0.680817	0.2	0.094	3.25767439981226e-95	ABHD17C
894	ENSG00000250326	9.44458300078131e-100	0.723147	0.201	0.096	3.43763932062438e-95	USP38-DT
895	ENSG00000136770	1.007481311246e-99	0.336155	0.635	0.431	3.66703047667319e-95	DNAJC1
896	ENSG00000167987	1.04938736703551e-99	0.755002	0.193	0.09	3.81956013853585e-95	VPS37C
897	ENSG00000256315	1.25896413735421e-99	1.05786	0.123	0.046	4.58237766714187e-95	CADM1-AS1
898	ENSG00000130822	1.5211874407677e-99	0.520563	0.355	0.205	5.53681804690627e-95	PNCK
899	ENSG00000180891	1.56021020086561e-99	0.489254	0.408	0.246	5.67885308911064e-95	CUEDC1
900	ENSG00000138083	5.61648537285207e-99	-1.53412	0.165	0.292	2.0442883460107e-94	SIX3
901	ENSG00000197980	5.83654516289296e-99	0.679897	0.187	0.086	2.12438570838978e-94	LEKR1
902	ENSG00000151575	1.01265666138124e-98	0.406391	0.37	0.214	3.68586771609543e-94	TEX9
903	ENSG00000148700	1.26258591917147e-98	0.417443	0.452	0.28	4.59556022860033e-94	ADD3
904	ENSG00000109686	3.2311290464782e-98	0.34088	0.628	0.433	1.17606635033714e-93	SH3D19
905	ENSG00000067113	4.28840347698875e-98	0.549811	0.325	0.186	1.56089309755437e-93	PLPP1
906	ENSG00000162105	5.99197319577079e-98	0.378276	0.625	0.426	2.18095840379665e-93	SHANK2
907	ENSG00000118181	7.40336058506081e-98	-0.921796	0.474	0.552	2.69467518575043e-93	RPS25
908	ENSG00000111837	9.11297093301647e-98	0.26972	0.93	0.806	3.31693916019933e-93	MAK
909	ENSG00000100003	9.30401644699065e-98	0.740205	0.216	0.107	3.38647590637566e-93	SEC14L2
910	ENSG00000286647	1.06247078504421e-97	1.19532	0.095	0.031	3.8671811634039e-93
911	ENSG00000176912	1.12176305068643e-97	1.66901	0.065	0.017	4.08299315188847e-93	TYMSOS
912	ENSG00000154265	1.44351797173182e-97	0.350537	0.685	0.482	5.25411671350948e-93	ABCA5
913	ENSG00000165164	2.04763204204872e-97	0.754513	0.161	0.07	7.45297110664895e-93	CFAP47
914	ENSG00000134504	3.27056403966279e-97	0.598707	0.287	0.157	1.19041989915646e-92	KCTD1
915	ENSG00000067715	4.26081199575138e-97	0.184403	1	0.993	1.55085035021359e-92	SYT1
916	ENSG00000255555	5.12136260674611e-97	1.50755	0.076	0.022	1.86407356160345e-92
917	ENSG00000114423	8.93695421585944e-97	0.321082	0.804	0.617	3.25287259548852e-92	CBLB
918	ENSG00000100316	1.17288602282708e-96	-0.805388	0.588	0.638	4.26907054588602e-92	RPL3
919	ENSG00000133112	1.21209598176912e-96	-1.0019	0.456	0.533	4.41178695444325e-92	TPT1
920	ENSG00000188859	1.85188594827989e-96	0.468883	0.351	0.202	6.74049447454914e-92	FAM78B
921	ENSG00000197405	1.8843092596073e-96	0.964608	0.158	0.069	6.85850884311864e-92	C5AR1
922	ENSG00000250634	2.85678876078717e-96	1.65649	0.063	0.016	1.03981397315132e-91	LINC01182
923	ENSG00000106789	3.21684588738557e-96	0.626492	0.238	0.122	1.1708675660906e-91	CORO2A
924	ENSG00000122417	3.62032012463176e-96	0.354989	0.711	0.518	1.31772411896347e-91	ODF2L
925	ENSG00000149346	4.13526057689226e-96	0.474194	0.359	0.21	1.50515214477724e-91	SLX4IP
926	ENSG00000242808	1.18187630005008e-95	0.971879	0.176	0.081	4.30179335692228e-91	SOX2-OT
927	ENSG00000285437	1.22242173580223e-95	0.434281	0.517	0.334	4.44937063397297e-91	POLR2J3
928	ENSG00000106701	1.4480275204042e-95	0.409207	0.386	0.228	5.27053056876719e-91	FSD1L
929	ENSG00000119729	2.54506008973531e-95	0.738614	0.215	0.106	9.26350971461858e-91	RHOQ
930	ENSG00000155749	2.56865173235993e-95	0.969094	0.128	0.05	9.34937857544368e-91	FLACC1
931	ENSG00000104723	2.90939463966738e-95	0.338132	0.568	0.374	1.05896146094613e-90	TUSC3
932	ENSG00000196296	5.44072200528822e-95	1.29991	0.093	0.031	1.98031399548481e-90	ATP2A1
933	ENSG00000075391	5.4761199990615e-95	0.260694	0.949	0.829	1.99319815725841e-90	RASAL2
934	ENSG00000101463	6.32150771699643e-95	0.311131	0.839	0.661	2.30090237883236e-90	SYNDIG1
935	ENSG00000138735	6.66169724572588e-95	0.398869	0.545	0.36	2.42472456349931e-90	PDE5A
936	ENSG00000144485	7.69572372451992e-95	-3.45806	0.018	0.114	2.80108952125076e-90	HES6
937	ENSG00000165588	8.08620142737727e-95	-0.358129	0.925	0.906	2.94321559553678e-90	OTX2
938	ENSG00000146376	8.1765236981577e-95	-1.70921	0.141	0.267	2.97609109565544e-90	ARHGAP18
939	ENSG00000155970	8.88855372623447e-95	0.331053	0.539	0.347	3.23525578527482e-90	MICU3
940	ENSG00000163399	1.0957062574727e-94	0.963787	0.157	0.069	3.98815163594912e-90	ATP1A1
941	ENSG00000284624	3.06574247422229e-94	1.0052	0.135	0.055	1.11586894576743e-89
942	ENSG00000154102	4.99108546250334e-94	0.438897	0.431	0.267	1.81665528664196e-89	C16orf74
943	ENSG00000108395	5.01812156717858e-94	0.437043	0.445	0.278	1.82649588802166e-89	TRIM37
944	ENSG00000147010	5.99012808605317e-94	0.93431	0.144	0.061	2.18028682076163e-89	SH3KBP1
945	ENSG00000104408	6.87195005104877e-94	-0.916161	0.416	0.507	2.50125237958073e-89	EIF3E
946	ENSG00000228877	9.85878426010813e-94	3.38185	0.024	0.002	3.58840029499416e-89
947	ENSG00000101255	1.20716891545366e-93	2.03516	0.047	0.01	4.39385341846824e-89	TRIB3
948	ENSG00000163935	1.870986243636e-93	0.472011	0.339	0.197	6.81001572958633e-89	SFMBT1
949	ENSG00000135250	3.27445764533014e-93	0.359316	0.658	0.472	1.19183709374726e-88	SRPK2
950	ENSG00000163293	5.58236947345723e-93	0.330205	0.748	0.544	2.03187084094896e-88	NIPAL1
951	ENSG00000163635	9.28491846718325e-93	0.437459	0.425	0.264	3.37952462368536e-88	ATXN7
952	ENSG00000227480	1.07333668143269e-92	1.47577	0.06	0.015	3.90673085307869e-88	CCDC148-AS1
953	ENSG00000229117	2.71700006653283e-92	-0.80599	0.612	0.652	9.88933684216618e-88	RPL41
954	ENSG00000115840	3.23011419884803e-92	0.401383	0.43	0.266	1.17569696609671e-87	SLC25A12
955	ENSG00000135083	4.5278412019316e-92	0.905735	0.144	0.062	1.64804364067906e-87	CCNJL
956	ENSG00000196405	7.64054866417924e-92	0.358517	0.652	0.461	2.78100690278796e-87	EVL
957	ENSG00000259768	1.56983903145976e-91	0.463382	0.312	0.177	5.71390010670724e-87	ZFHX3-AS1
958	ENSG00000261801	1.6110757442615e-91	-2.21011	0.058	0.167	5.86399349396299e-87	LOXL1-AS1
959	ENSG00000102908	2.33943391660545e-91	0.318512	0.752	0.563	8.51507156966051e-87	NFAT5
960	ENSG00000076344	9.20413655987149e-91	2.45015	0.035	0.005	3.35012162506202e-86	RGS11
961	ENSG00000198034	1.42462805931727e-90	-0.99138	0.48	0.549	5.18536121030302e-86	RPS4X
962	ENSG00000103187	1.43602056983137e-90	0.746042	0.207	0.104	5.22682767007223e-86	COTL1
963	ENSG00000251128	1.78027657593241e-90	1.62891	0.054	0.013	6.47985068107879e-86	WWC2-AS1
964	ENSG00000049323	2.63941045680463e-90	-1.28141	0.242	0.366	9.60692618067751e-86	LTBP1
965	ENSG00000185924	4.31190685024272e-90	0.439023	0.4	0.244	1.56944785535134e-85	RTN4RL1
966	ENSG00000153310	7.21888474286089e-90	0.363371	0.518	0.34	2.62752966870651e-85	CYRIB
967	ENSG00000253438	8.25203535590167e-90	0.941175	0.127	0.052	3.00357582884109e-85	PCAT1
968	ENSG00000138686	8.48676832654376e-90	0.465566	0.302	0.17	3.0890139354954e-85	BBS7
969	ENSG00000127914	8.67636125075913e-90	0.254815	0.964	0.875	3.15802196805131e-85	AKAP9
970	ENSG00000176155	9.2246573871038e-90	0.416259	0.429	0.267	3.35759079575804e-85	CCDC57
971	ENSG00000120278	1.15730991043381e-89	1.07682	0.144	0.063	4.21237661199697e-85	PLEKHG1
972	ENSG00000231607	1.21449028622173e-89	-0.387678	0.953	0.933	4.42050174378984e-85	DLEU2
973	ENSG00000184182	2.30994852572457e-89	0.496522	0.351	0.207	8.40775064393229e-85	UBE2F
974	ENSG00000072041	3.16039504358548e-89	0.282099	0.753	0.543	1.15032058796424e-84	SLC6A15
975	ENSG00000256311	4.27968350047235e-89	-4.67255	0.005	0.087	1.55771920050193e-84
976	ENSG00000111450	4.73195863455549e-89	0.66811	0.212	0.106	1.72233830380551e-84	STX2
977	ENSG00000145012	7.14096376776003e-89	0.48667	0.314	0.182	2.59916799218929e-84	LPP
978	ENSG00000205683	7.3285908618699e-89	0.32732	0.68	0.484	2.6674605019034e-84	DPF3
979	ENSG00000129451	8.36655446023249e-89	3.10347	0.025	0.003	3.04525849243542e-84	KLK10
980	ENSG00000250159	9.90811843376105e-89	1.0738	0.107	0.04	3.60635694752035e-84	PKD2L2-DT
981	ENSG00000182185	1.0198008073323e-88	0.266887	0.469	0.301	3.7118709785281e-84	RAD51B
982	ENSG00000181381	1.08734036645023e-88	2.04689	0.037	0.006	3.95770146580553e-84	DDX60L
983	ENSG00000197106	1.92497860337198e-88	-0.704885	0.552	0.614	7.00653712055334e-84	SLC6A17
984	ENSG00000174748	2.18445523828805e-88	-0.819005	0.547	0.605	7.95098017632086e-84	RPL15
985	ENSG00000075702	2.50289972619421e-88	0.893807	0.128	0.052	9.11005442340168e-84	WDR62
986	ENSG00000122477	2.52624942598388e-88	1.15743	0.118	0.047	9.19504266069611e-84	LRRC39
987	ENSG00000140367	3.00664388960807e-88	0.393312	0.383	0.231	1.09435824293955e-83	UBE2Q2
988	ENSG00000168038	3.07051957772426e-88	0.405205	0.431	0.272	1.11760771590008e-83	ULK4
989	ENSG00000204764	3.25484234307234e-88	0.371737	0.353	0.209	1.18469751603147e-83	RANBP17
990	ENSG00000080200	3.53247562770914e-88	-0.922297	0.462	0.535	1.28575047897357e-83	CRYBG3
991	ENSG00000231028	3.57001149710401e-88	0.644754	0.197	0.097	1.29941278471592e-83	AHI1-DT
992	ENSG00000158560	3.68474242002934e-88	0.990389	0.106	0.04	1.34117254604228e-83	DYNC1I1
993	ENSG00000137501	3.76702349158487e-88	0.83481	0.138	0.058	1.37112121046706e-83	SYTL2
994	ENSG00000176887	5.41727294293104e-88	-2.21768	0.056	0.162	1.97177900576804e-83	SOX11
995	ENSG00000111249	5.76049444604519e-88	-3.54144	0.012	0.098	2.09670476847153e-83	CUX2
996	ENSG00000203756	7.7222750048744e-88	-0.390377	0.929	0.892	2.81075365627418e-83	TMEM244
997	ENSG00000105392	1.24678255330972e-87	0.428639	0.683	0.51	4.5380391375367e-83	CRX
998	ENSG00000196277	1.47818808736544e-87	0.75402	0.1	0.036	5.38030900039274e-83	GRM7
999	ENSG00000116251	2.02361727735236e-87	-0.911516	0.421	0.506	7.36556216610713e-83	RPL22
1000	ENSG00000117020	2.15640328975199e-87	-0.487912	0.876	0.851	7.8488766940393e-83	AKT3
1001	ENSG00000099968	2.34189218798241e-87	0.351929	0.548	0.366	8.52401918581836e-83	BCL2L13
1002	ENSG00000176571	2.84869173349718e-87	2.41449	0.039	0.007	1.0368668171583e-82	CNBD1
1003	ENSG00000148187	3.33703005074062e-87	0.524387	0.264	0.144	1.21461219786857e-82	MRRF
1004	ENSG00000205268	4.02697331521554e-87	0.380362	0.521	0.345	1.46573774727215e-82	PDE7A
1005	ENSG00000136167	5.66013921140933e-87	2.8828	0.027	0.003	2.06017747016877e-82	LCP1
1006	ENSG00000171612	6.36855105755527e-87	0.701121	0.212	0.108	2.31802521392897e-82	SLC25A33
1007	ENSG00000165181	7.16331000128844e-87	0.797429	0.144	0.063	2.60730157426897e-82	SHOC1
1008	ENSG00000156313	7.54036560742885e-87	0.496384	0.327	0.191	2.74454227379195e-82	RPGR
1009	ENSG00000171757	7.68317504906659e-87	0.814498	0.156	0.07	2.79652205435926e-82	LRRC34
1010	ENSG00000060656	1.14958658923369e-86	0.795101	0.172	0.081	4.18426526749278e-82	PTPRU
1011	ENSG00000205129	1.4252200760209e-86	0.655793	0.194	0.095	5.18751603270088e-82	C4orf47
1012	ENSG00000267568	1.485770569594e-86	1.81768	0.05	0.012	5.40790771920825e-82
1013	ENSG00000167654	1.56007583267476e-86	0.825952	0.175	0.083	5.67836401576958e-82	ATCAY
1014	ENSG00000111669	1.8619755426199e-86	-1.00274	0.339	0.439	6.7772185800279e-82	TPI1
1015	ENSG00000106278	4.85111714776225e-86	0.243898	0.969	0.882	1.7657096194425e-81	PTPRZ1
1016	ENSG00000091157	6.89706509324187e-86	0.309579	0.596	0.405	2.51039375263818e-81	WDR7
1017	ENSG00000114796	8.80155732388427e-86	-0.782715	0.504	0.569	3.2035908347474e-81	KLHL24
1018	ENSG00000163083	1.13702681304573e-85	-2.09527	0.069	0.176	4.13855019412386e-81	INHBB
1019	ENSG00000160305	1.30115456987957e-85	0.433979	0.399	0.246	4.73594240344767e-81	DIP2A
1020	ENSG00000185008	1.62044510508776e-85	-0.35302	0.986	0.969	5.89809609349843e-81	ROBO2
1021	ENSG00000185842	1.71516941300249e-85	0.859221	0.152	0.069	6.24287362944648e-81	DNAH14
1022	ENSG00000106868	1.77934913583013e-85	0.589631	0.237	0.126	6.47647498459451e-81	SUSD1
1023	ENSG00000196531	2.31053778145292e-85	-0.977631	0.387	0.475	8.40989541693232e-81	NACA
1024	ENSG00000167281	2.82546508621721e-85	-3.87096	0.014	0.1	1.02841278208134e-80	RBFOX3
1025	ENSG00000228784	7.24123288229834e-85	1.39488	0.071	0.021	2.63566394449895e-80	LINC00954
1026	ENSG00000102804	7.35766625993189e-85	0.298315	0.618	0.428	2.67804336529001e-80	TSC22D1
1027	ENSG00000245573	1.31577827986394e-84	0.729449	0.149	0.067	4.78916978304878e-80	BDNF-AS
1028	ENSG00000235269	1.40837524424312e-84	3.085	0.023	0.002	5.1262042139961e-80	LINC02331
1029	ENSG00000141519	1.63122345844983e-84	0.883012	0.139	0.061	5.9373271440657e-80	CCDC40
1030	ENSG00000172915	1.66782028469133e-84	-0.336145	0.962	0.936	6.0705322722195e-80	NBEA
1031	ENSG00000059588	1.85739951862785e-84	0.57283	0.23	0.121	6.76056276790166e-80	TARBP1
1032	ENSG00000250978	2.27103185720571e-84	1.28401	0.077	0.025	8.26610175385735e-80
1033	ENSG00000241570	3.13571944247146e-84	2.1451	0.04	0.008	1.14133916267076e-79	PAQR9-AS1
1034	ENSG00000142784	3.55968040221974e-84	0.4104	0.398	0.248	1.29565247279994e-79	WDTC1
1035	ENSG00000079805	3.64041992341483e-84	0.463035	0.36	0.217	1.32504004372453e-79	DNM2
1036	ENSG00000156639	3.76518910638928e-84	0.236408	0.947	0.82	1.37045353094357e-79	ZFAND3
1037	ENSG00000110841	4.60145811719993e-84	0.434556	0.307	0.176	1.67483872549843e-79	PPFIBP1
1038	ENSG00000204628	5.01734885561747e-84	-0.980244	0.41	0.49	1.82621463646765e-79	RACK1
1039	ENSG00000011566	6.24268276292633e-84	0.274786	0.877	0.721	2.27221167204993e-79	MAP4K3
1040	ENSG00000108100	6.71786351728593e-84	0.304517	0.739	0.546	2.44516796302173e-79	CCNY
1041	ENSG00000157869	8.23697672289364e-84	0.281619	0.754	0.563	2.99809478759883e-79	RAB28
1042	ENSG00000069702	8.73552849408281e-84	1.53685	0.055	0.014	3.17955766127626e-79	TGFBR3
1043	ENSG00000250842	1.08725482713121e-83	1.61428	0.047	0.011	3.95739011979219e-79
1044	ENSG00000119335	1.12101873110054e-83	-1.12506	0.268	0.377	4.08028397745975e-79	SET
1045	ENSG00000101966	1.22663159090018e-83	0.438956	0.394	0.246	4.46469366455849e-79	XIAP
1046	ENSG00000152763	1.51105966387221e-83	0.568082	0.216	0.112	5.49995496456208e-79	DNAI4
1047	ENSG00000073464	2.0555145311758e-83	0.578343	0.231	0.123	7.48166179057366e-79	CLCN4
1048	ENSG00000167491	2.58519586953414e-83	0.545936	0.288	0.165	9.40959592593038e-79	GATAD2A
1049	ENSG00000234083	2.83330833923927e-83	-3.04588	0.017	0.103	1.03126756931631e-78
1050	ENSG00000182534	2.83541290006919e-83	0.771479	0.16	0.074	1.03203358736718e-78	MXRA7
1051	ENSG00000239381	2.99912499620286e-83	1.46576	0.071	0.022	1.09162151611792e-78
1052	ENSG00000172986	4.19969820081329e-83	1.88306	0.048	0.011	1.52860615113202e-78	GXYLT2
1053	ENSG00000287045	5.16464401650001e-83	1.24139	0.075	0.024	1.87982712912567e-78
1054	ENSG00000131558	6.13387710228731e-83	0.213438	0.98	0.924	2.23260858769053e-78	EXOC4
1055	ENSG00000163453	6.74068851705033e-83	1.24196	0.091	0.032	2.45347580643598e-78	IGFBP7
1056	ENSG00000145391	1.52086326033049e-82	0.382906	0.335	0.197	5.53563809495091e-78	SETD7
1057	ENSG00000034510	2.23425235568828e-82	-1.039	0.374	0.463	8.1322317242342e-78	TMSB10
1058	ENSG00000122778	3.34894347773548e-82	0.616916	0.202	0.103	1.21894844702616e-77	KIAA1549
1059	ENSG00000264924	4.38542812699504e-82	2.17968	0.038	0.007	1.59620812966365e-77
1060	ENSG00000106348	6.1416505498451e-82	0.588957	0.219	0.114	2.23543796713262e-77	IMPDH1
1061	ENSG00000137707	6.18612548504757e-82	2.61245	0.027	0.004	2.25162595404761e-77	BTG4
1062	ENSG00000006283	6.44660877138511e-82	1.50092	0.069	0.021	2.34643666060875e-77	CACNA1G
1063	ENSG00000183454	1.19094198034825e-81	0.521748	0.223	0.117	4.33479062007157e-77	GRIN2A
1064	ENSG00000188846	1.34946742787699e-81	-0.964686	0.413	0.492	4.91179154398665e-77	RPL14
1065	ENSG00000137968	1.45623958961268e-81	-2.09854	0.07	0.175	5.30042085827223e-77	SLC44A5
1066	ENSG00000082146	1.59948298951083e-81	0.340725	0.602	0.415	5.82179818522151e-77	STRADB
1067	ENSG00000033627	3.18072447225936e-81	0.388882	0.544	0.372	1.15772009341296e-76	ATP6V0A1
1068	ENSG00000107186	3.9961817342189e-81	0.320007	0.513	0.34	1.454530227621e-76	MPDZ
1069	ENSG00000115053	4.50581375093843e-81	-1.1586	0.244	0.353	1.64002608906657e-76	NCL
1070	ENSG00000286219	4.55695442071347e-81	0.5774	0.179	0.087	1.65864027005129e-76	NOTCH2NLC
1071	ENSG00000141337	5.65366544042919e-81	0.514488	0.259	0.143	2.05782114700742e-76	ARSG
1072	ENSG00000226530	5.93025367910901e-81	1.4299	0.062	0.018	2.1584937341221e-76
1073	ENSG00000092978	6.71028223250739e-81	0.358791	0.469	0.309	2.44240852698804e-76	GPATCH2
1074	ENSG00000186976	9.55233782782804e-81	0.394077	0.336	0.2	3.47685992257285e-76	EFCAB6
1075	ENSG00000115825	1.0210327675687e-80	0.336984	0.535	0.36	3.71635506739655e-76	PRKD3
1076	ENSG00000143398	1.65555153112701e-80	0.369671	0.464	0.302	6.02587646299609e-76	PIP5K1A
1077	ENSG00000169504	2.85472895259669e-80	0.3382	0.554	0.381	1.03906424416614e-75	CLIC4
1078	ENSG00000183826	3.13484501876792e-80	0.256301	0.668	0.481	1.14102088993115e-75	BTBD9
1079	ENSG00000182606	3.28677526754875e-80	0.329876	0.631	0.448	1.19632046188239e-75	TRAK1
1080	ENSG00000185518	3.37984993987601e-80	0.302168	0.655	0.464	1.23019778111607e-75	SV2B
1081	ENSG00000115419	3.55153850148598e-80	0.285094	0.712	0.522	1.29268898377087e-75	GLS
1082	ENSG00000103591	6.98264494900917e-80	0.517125	0.222	0.118	2.54154310854036e-75	AAGAB
1083	ENSG00000249242	1.01421408178928e-79	0.804983	0.149	0.069	3.6915364148966e-75	TMEM150C
1084	ENSG00000164100	1.0232552272483e-79	1.58722	0.062	0.018	3.72444437613837e-75	NDST3
1085	ENSG00000230647	1.50981939546454e-79	1.29705	0.068	0.02	5.49544063561184e-75
1086	ENSG00000152413	1.71287498756341e-79	0.646097	0.202	0.105	6.23452237973328e-75	HOMER1
1087	ENSG00000170522	2.31579251954139e-79	0.859896	0.156	0.074	8.42902161262673e-75	ELOVL6
1088	ENSG00000131370	2.59651123474379e-79	0.710547	0.178	0.088	9.45078159222047e-75	SH3BP5
1089	ENSG00000119900	2.69265130262047e-79	0.336837	0.486	0.32	9.80071221127799e-75	OGFRL1
1090	ENSG00000118257	2.76260445231727e-79	1.62999	0.054	0.014	1.00553276855444e-74	NRP2
1091	ENSG00000145819	2.86736746305497e-79	0.482958	0.245	0.134	1.04366440920275e-74	ARHGAP26
1092	ENSG00000149177	4.36039516080409e-79	1.13479	0.108	0.043	1.58709663062947e-74	PTPRJ
1093	ENSG00000157617	4.59312586148179e-79	0.410674	0.337	0.202	1.67180595106214e-74	C2CD2
1094	ENSG00000054654	6.58525707140965e-79	-0.615751	0.646	0.675	2.39690186885168e-74	SYNE2
1095	ENSG00000129682	7.08942434344438e-79	0.264871	0.592	0.421	2.58040867252688e-74	FGF13
1096	ENSG00000186474	7.35077559315868e-79	3.14705	0.023	0.003	2.6755353003979e-74	KLK12
1097	ENSG00000169756	7.46385683561211e-79	0.285713	0.489	0.322	2.7166946110261e-74	LIMS1
1098	ENSG00000137393	1.14287801812868e-78	2.1145	0.039	0.008	4.15984741038477e-74	RNF144B
1099	ENSG00000102471	1.21952510192949e-78	0.756958	0.141	0.063	4.43882746600296e-74	NDFIP2
1100	ENSG00000138801	1.4803750824432e-78	0.416131	0.405	0.257	5.38826922507674e-74	PAPSS1
1101	ENSG00000221866	1.49766260221129e-78	0.546218	0.245	0.136	5.45119233952866e-74	PLXNA4
1102	ENSG00000048342	2.18127326383343e-78	0.289413	0.78	0.604	7.93939842570091e-74	CC2D2A
1103	ENSG00000118495	2.59503779371202e-78	0.751285	0.143	0.065	9.44541856155301e-74	PLAGL1
1104	ENSG00000129757	2.66743296935324e-78	-1.48732	0.153	0.263	9.70892252185192e-74	CDKN1C
1105	ENSG00000197958	3.74397533070127e-78	-1.04398	0.368	0.453	1.36273214086865e-73	RPL12
1106	ENSG00000140488	5.68928403684398e-78	0.359079	0.417	0.263	2.07078560373047e-73	CELF6
1107	ENSG00000006607	6.0082519293754e-78	0.321286	0.545	0.367	2.18688353725406e-73	FARP2
1108	ENSG00000113396	6.88137022827148e-78	0.689972	0.126	0.054	2.50468113568625e-73	SLC27A6
1109	ENSG00000101152	7.47178981032658e-78	0.53827	0.244	0.134	2.71958205516267e-73	DNAJC5
1110	ENSG00000140511	7.63130489859653e-78	3.27147	0.021	0.002	2.77764235699116e-73	HAPLN3
1111	ENSG00000071082	7.87216753520025e-78	-0.946908	0.427	0.498	2.86531153946219e-73	RPL31
1112	ENSG00000145087	8.28908950684665e-78	0.271725	0.816	0.648	3.01706279870204e-73	STXBP5L
1113	ENSG00000279170	9.80404651539962e-78	0.585592	0.241	0.133	3.56847685067515e-73	TSTD3
1114	ENSG00000172270	1.03076323024295e-77	-1.02676	0.31	0.406	3.75177200543829e-73	BSG
1115	ENSG00000229531	1.08834263660871e-77	1.32138	0.074	0.024	3.96134952872839e-73	RABGAP1L-AS1
1116	ENSG00000214960	1.46628771406517e-77	0.5011	0.216	0.115	5.33699402165441e-73	CRPPA
1117	ENSG00000119636	1.46866273994234e-77	0.727284	0.159	0.076	5.34563864084212e-73	BBOF1
1118	ENSG00000281196	1.59916797239165e-77	-4.13969	0.008	0.082	5.82065158591114e-73	LINC00934
1119	ENSG00000267709	1.66059032648693e-77	2.93308	0.022	0.002	6.04421667034714e-73
1120	ENSG00000272514	1.8842319979098e-77	1.073	0.078	0.026	6.85822762599208e-73	CFAP206
1121	ENSG00000119487	2.46489858270019e-77	0.30695	0.557	0.378	8.97173786131214e-73	MAPKAP1
1122	ENSG00000100583	2.73855305395623e-77	1.20109	0.085	0.03	9.9677854057899e-73	SAMD15
1123	ENSG00000250564	3.8686438949033e-77	1.21802	0.072	0.023	1.4081090048669e-72	LINC02999
1124	ENSG00000164066	4.19320106947107e-77	0.276128	0.584	0.402	1.52624132526608e-72	INTU
1125	ENSG00000064225	4.62080246549987e-77	1.08357	0.093	0.035	1.68187968139264e-72	ST3GAL6
1126	ENSG00000249776	4.84722231117454e-77	1.58712	0.066	0.02	1.76429197682131e-72
1127	ENSG00000183780	7.28043631863199e-77	-0.614978	0.788	0.776	2.64993321125567e-72	SLC35F3
1128	ENSG00000175895	7.65156827322029e-77	0.9249	0.112	0.046	2.78501782008672e-72	PLEKHF2
1129	ENSG00000164659	1.0690261731932e-76	0.375073	0.268	0.152	3.89104146518862e-72	ELAPOR2
1130	ENSG00000125851	2.15899565201789e-76	-2.28616	0.067	0.165	7.8583123742147e-72	PCSK2
1131	ENSG00000138029	2.42508871804436e-76	0.434525	0.331	0.2	8.82683791593786e-72	HADHB
1132	ENSG00000143643	3.93760130125662e-76	0.542899	0.216	0.116	1.43320812163138e-71	TTC13
1133	ENSG00000286511	4.51788883471549e-76	0.806598	0.124	0.054	1.64442117805974e-71
1134	ENSG00000166016	5.34798615501811e-76	-2.23478	0.048	0.142	1.94656000070349e-71	ABTB2
1135	ENSG00000231401	8.3117318803016e-76	1.05313	0.09	0.033	3.02530416979218e-71
1136	ENSG00000137449	1.52075021074506e-75	0.402745	0.294	0.173	5.53522661706987e-71	CPEB2
1137	ENSG00000205581	1.66971384796318e-75	0.327722	0.747	0.58	6.07742446381639e-71	HMGN1
1138	ENSG00000172296	2.21752641050478e-75	2.023	0.038	0.008	8.0713526289553e-71	SPTLC3
1139	ENSG00000110090	2.55140060450587e-75	0.427433	0.335	0.203	9.28658792028048e-71	CPT1A
1140	ENSG00000171863	4.02590407641834e-75	-0.798145	0.529	0.575	1.46534856573475e-70	RPS7
1141	ENSG00000198794	5.39211353417354e-75	0.581266	0.202	0.106	1.96262148416849e-70	SCAMP5
1142	ENSG00000172809	6.04602871888103e-75	-1.07773	0.35	0.433	2.20063353309832e-70	RPL38
1143	ENSG00000204160	6.28885555963137e-75	0.791809	0.136	0.061	2.28901764659463e-70	ZDHHC18
1144	ENSG00000144959	6.54651575059527e-75	0.905978	0.104	0.041	2.38280080290167e-70	NCEH1
1145	ENSG00000170537	7.1291561617565e-75	1.38438	0.07	0.023	2.59487025975613e-70	TMC7
1146	ENSG00000116675	7.28581106485356e-75	0.350815	0.404	0.257	2.6518895113854e-70	DNAJC6
1147	ENSG00000100647	1.24316370292489e-74	0.369316	0.362	0.224	4.52486724590602e-70	SUSD6
1148	ENSG00000187772	1.76645266739146e-74	0.668714	0.161	0.078	6.42953441877142e-70	LIN28B
1149	ENSG00000257759	2.11003734270287e-74	0.551279	0.179	0.09	7.68011391996991e-70
1150	ENSG00000132026	2.64803925272978e-74	0.832105	0.127	0.056	9.63833327208587e-70	RTBDN
1151	ENSG00000112139	2.76558031431031e-74	-3.37862	0.014	0.091	1.00661592280267e-69	MDGA1
1152	ENSG00000178662	3.44986343884058e-74	-0.440004	0.873	0.846	1.25568129446919e-69	CSRNP3
1153	ENSG00000175766	3.79995859278375e-74	2.57767	0.025	0.003	1.38310892860143e-69	EIF4E1B
1154	ENSG00000261763	4.5283096777058e-74	1.52045	0.055	0.015	1.64821415649136e-69
1155	ENSG00000188095	5.76407532033083e-74	0.770616	0.128	0.057	2.09800813509402e-69	MESP2
1156	ENSG00000114446	5.8312822452936e-74	0.411726	0.345	0.212	2.12247011164196e-69	IFT57
1157	ENSG00000144445	7.3266911826445e-74	-0.682022	0.599	0.63	2.66676905665894e-69	KANSL1L
1158	ENSG00000161016	7.36184561906831e-74	-0.846884	0.466	0.532	2.67956456842848e-69	RPL8
1159	ENSG00000163093	1.04134496238482e-73	0.346681	0.401	0.254	3.79028739408828e-69	BBS5
1160	ENSG00000198964	1.40277139426747e-73	0.321723	0.491	0.329	5.10580732085474e-69	SGMS1
1161	ENSG00000005108	1.45843226678231e-73	0.178108	0.695	0.495	5.30840176463424e-69	THSD7A
1162	ENSG00000152284	1.55602383102615e-73	0.481844	0.232	0.129	5.66361554016899e-69	TCF7L1
1163	ENSG00000162814	1.72163252538231e-73	0.696361	0.158	0.077	6.26639806588655e-69	SPATA17
1164	ENSG00000112773	2.19800943536237e-73	0.660829	0.119	0.051	8.00031474283196e-69	TENT5A
1165	ENSG00000239672	3.25130938383495e-73	0.502565	0.224	0.122	1.18341158952825e-68	NME1
1166	ENSG00000170606	4.11046506940794e-73	0.327493	0.617	0.443	1.4961270759631e-68	HSPA4
1167	ENSG00000083720	5.98676529959068e-73	0.357825	0.338	0.207	2.17906283374502e-68	OXCT1
1168	ENSG00000149179	6.58155842956082e-73	0.260369	0.835	0.669	2.39555563719155e-68	CSTPP1
1169	ENSG00000065308	6.72773336264649e-73	0.540783	0.22	0.12	2.44876038933607e-68	TRAM2
1170	ENSG00000109762	7.29501204896545e-73	0.396237	0.317	0.191	2.65523848558244e-68	SNX25
1171	ENSG00000135486	7.94091833402144e-73	-0.969081	0.372	0.452	2.89033545521713e-68	HNRNPA1
1172	ENSG00000067208	8.2739338390654e-73	0.233649	0.61	0.425	3.01154643874303e-68	EVI5
1173	ENSG00000166405	9.09553631317066e-73	0.272355	0.529	0.354	3.31059330726786e-68	RIC3
1174	ENSG00000226953	1.08542129251217e-72	1.60547	0.052	0.014	3.95071642048579e-68	NCKAP5-AS2
1175	ENSG00000166165	1.17873165757165e-72	-0.624526	0.577	0.626	4.29034748722928e-68	CKB
1176	ENSG00000183778	1.37296926735957e-72	3.04394	0.024	0.003	4.99733353933537e-68	B3GALT5
1177	ENSG00000172765	1.81430138972099e-72	0.257855	0.603	0.426	6.60369419830647e-68	TMCC1
1178	ENSG00000132199	1.95308576927493e-72	0.346104	0.445	0.293	7.10884158300689e-68	ENOSF1
1179	ENSG00000172817	2.41478613584494e-72	0.424681	0.288	0.171	8.7893385772484e-68	CYP7B1
1180	ENSG00000254420	2.55854935961474e-72	0.484931	0.224	0.123	9.31260795912573e-68
1181	ENSG00000108107	3.25737861712165e-72	-0.848127	0.504	0.559	1.18562066905994e-67	RPL28
1182	ENSG00000153113	6.02657745971759e-72	0.49875	0.226	0.124	2.19355366378801e-67	CAST
1183	ENSG00000004139	9.3171182746058e-72	0.618816	0.193	0.102	3.39124470959102e-67	SARM1
1184	ENSG00000095397	1.0166399597534e-71	0.383122	0.339	0.207	3.70036612551043e-67	WHRN
1185	ENSG00000183323	1.0177890755131e-71	0.850956	0.13	0.059	3.70454867705258e-67	CCDC125
1186	ENSG00000197312	1.48591963121721e-71	0.422702	0.311	0.187	5.40845027370441e-67	DDI2
1187	ENSG00000110092	1.53655910524846e-71	-3.3494	0.013	0.086	5.59276783128333e-67	CCND1
1188	ENSG00000285755	1.79960235618573e-71	1.00177	0.075	0.026	6.55019265604481e-67
1189	ENSG00000286466	1.81987952246274e-71	2.14957	0.036	0.007	6.62399748585989e-67
1190	ENSG00000130584	2.27870720288819e-71	1.15427	0.085	0.032	8.29403847707243e-67	ZBTB46
1191	ENSG00000263069	3.77224655462115e-71	0.396156	0.363	0.228	1.373022300951e-66	RNF213-AS1
1192	ENSG00000232006	4.11145661864942e-71	3.05919	0.021	0.002	1.49648798005601e-66
1193	ENSG00000008441	4.25242828351001e-71	-2.78035	0.024	0.103	1.54779884663197e-66	NFIX
1194	ENSG00000153832	5.43259581603491e-71	0.512596	0.198	0.105	1.97735622512039e-66	FBXO36
1195	ENSG00000128000	6.5471476397871e-71	0.388127	0.366	0.229	2.38303079792971e-66	ZNF780B
1196	ENSG00000189308	7.18203165582365e-71	0.391398	0.317	0.192	2.61411588208669e-66	LIN54
1197	ENSG00000196358	7.91528602429299e-71	0.455013	0.289	0.172	2.88100580712216e-66	NTNG2
1198	ENSG00000182070	1.09473017043315e-70	4.46696	0.014	0.001	3.98459887434258e-66	OR52A1
1199	ENSG00000187185	1.17123571798291e-70	0.819275	0.099	0.04	4.26306376631419e-66
1200	ENSG00000134686	1.85278199742423e-70	0.392171	0.433	0.288	6.74375591422471e-66	PHC2
1201	ENSG00000092853	2.49046473190991e-70	0.827586	0.125	0.056	9.06479353120568e-66	CLSPN
1202	ENSG00000084710	2.63048584429662e-70	0.717676	0.174	0.089	9.57444237607083e-66	EFR3B
1203	ENSG00000001460	3.35260866724393e-70	0.972594	0.081	0.029	1.22028250270345e-65	STPG1
1204	ENSG00000134516	3.56234587873533e-70	3.57166	0.017	0.001	1.29662265294209e-65	DOCK2
1205	ENSG00000088727	4.93298727518266e-70	0.612947	0.163	0.081	1.79550870842098e-65	KIF9
1206	ENSG00000100744	5.24672219735681e-70	0.737209	0.141	0.067	1.90970194539393e-65	GSKIP
1207	ENSG00000267000	5.32647237256227e-70	3.07792	0.02	0.002	1.93872941416522e-65
1208	ENSG00000248458	5.42477953304801e-70	0.714419	0.129	0.059	1.97451125443882e-65
1209	ENSG00000164070	5.48359406057681e-70	0.546489	0.208	0.113	1.99591856616875e-65	HSPA4L
1210	ENSG00000074755	6.32466314746678e-70	0.329228	0.451	0.298	2.30205089241496e-65	ZZEF1
1211	ENSG00000184903	6.47268318403228e-70	-0.663589	0.698	0.715	2.35592722532407e-65	IMMP2L
1212	ENSG00000038532	8.70992649994937e-70	0.316481	0.411	0.266	3.17023904745157e-65	CLEC16A
1213	ENSG00000009413	1.1080117069233e-69	0.265128	0.642	0.466	4.03294101085943e-65	REV3L
1214	ENSG00000105278	1.43323398751941e-69	0.847009	0.119	0.053	5.21668506777315e-65	ZFR2
1215	ENSG00000180448	3.05926994499569e-69	3.23962	0.022	0.003	1.11351307457953e-64	ARHGAP45
1216	ENSG00000077264	5.11768846691731e-69	-2.244	0.04	0.124	1.86273624818856e-64	PAK3
1217	ENSG00000106392	5.65807109330755e-69	0.270672	0.571	0.399	2.05942471654208e-64	C1GALT1
1218	ENSG00000140263	8.1298057622399e-69	0.845947	0.138	0.065	2.95908670134008e-64	SORD
1219	ENSG00000170035	8.44135090374787e-69	0.251564	0.781	0.604	3.07248290194615e-64	UBE2E3
1220	ENSG00000266456	9.62268574826937e-69	1.95998	0.034	0.007	3.50246515865509e-64
1221	ENSG00000100095	1.15912120329076e-68	-1.16716	0.235	0.339	4.2189693557377e-64	SEZ6L
1222	ENSG00000091844	1.21182778128858e-68	0.751919	0.14	0.067	4.41081075833417e-64	RGS17
1223	ENSG00000229846	1.48903482532528e-68	0.848588	0.098	0.04	5.41978895721894e-64
1224	ENSG00000132294	3.06213967555323e-68	0.247094	0.708	0.523	1.11455759910786e-63	EFR3A
1225	ENSG00000175497	3.07520832052301e-68	-3.03756	0.038	0.121	1.11931432450396e-63	DPP10
1226	ENSG00000153558	3.68916489958589e-68	0.236146	0.447	0.296	1.34278224015127e-63	FBXL2
1227	ENSG00000064115	4.62346253613881e-68	0.423785	0.28	0.166	1.6828478939038e-63	TM7SF3
1228	ENSG00000128881	5.17542413735639e-68	0.285953	0.579	0.41	1.88375087751498e-63	TTBK2
1229	ENSG00000066084	6.00890207717389e-68	0.307704	0.653	0.486	2.18712017804975e-63	DIP2B
1230	ENSG00000178425	6.26914042830365e-68	0.38665	0.245	0.14	2.28184173309396e-63	NT5DC1
1231	ENSG00000229922	8.72075043484279e-68	2.08352	0.032	0.006	3.17417874327408e-63	LINC02865
1232	ENSG00000163110	8.76154418616682e-68	0.31633	0.334	0.208	3.189026852881e-63	PDLIM5
1233	ENSG00000185974	9.07057389102577e-68	0.999054	0.083	0.031	3.30150748485556e-63	GRK1
1234	ENSG00000249736	9.17289559154794e-68	1.42802	0.052	0.015	3.33875053741162e-63	LINC02242
1235	ENSG00000107263	9.39428421215277e-68	0.383118	0.317	0.195	3.41933156753937e-63	RAPGEF1
1236	ENSG00000234807	1.46585174595439e-67	1.24699	0.066	0.022	5.33540718492477e-63	LINC01135
1237	ENSG00000165209	1.520360054033e-67	0.251524	0.594	0.422	5.53380652466931e-63	STRBP
1238	ENSG00000227398	2.33822196941492e-67	0.43187	0.289	0.176	8.51066032427642e-63	KIF9-AS1
1239	ENSG00000116106	2.53895996955783e-67	-2.09301	0.053	0.141	9.24130649719657e-63	EPHA4
1240	ENSG00000148935	2.82655194088521e-67	0.646585	0.107	0.045	1.0288083754434e-62	GAS2
1241	ENSG00000068650	2.89655575084639e-67	0.268849	0.522	0.355	1.05428836219307e-62	ATP11A
1242	ENSG00000144824	3.11023728342946e-67	0.950691	0.087	0.034	1.13206416642266e-62	PHLDB2
1243	ENSG00000231889	4.8414404752731e-67	0.321331	0.425	0.284	1.7621875041899e-62	TRAF3IP2-AS1
1244	ENSG00000260185	6.01607094663151e-67	1.38211	0.056	0.017	2.18972950315494e-62
1245	ENSG00000171914	6.34268560107029e-67	0.233385	0.806	0.637	2.30861070507757e-62	TLN2
1246	ENSG00000082898	6.64083072692374e-67	0.308989	0.63	0.465	2.4171295679857e-62	XPO1
1247	ENSG00000110422	7.50278725215041e-67	0.347685	0.336	0.211	2.73086450403771e-62	HIPK3
1248	ENSG00000170315	7.52010793625699e-67	-0.804848	0.419	0.488	2.73716888663882e-62	UBB
1249	ENSG00000248994	8.81528720544877e-67	1.54668	0.051	0.014	3.20858823703924e-62
1250	ENSG00000138802	9.57811713083366e-67	0.247714	0.606	0.431	3.48624307328084e-62	SEC24B
1251	ENSG00000182158	1.10256354312189e-66	0.511466	0.182	0.096	4.01311078425504e-62	CREB3L2
1252	ENSG00000183833	1.23791660863026e-66	0.776506	0.113	0.05	4.50576887209243e-62	CFAP91
1253	ENSG00000090661	1.28333892143754e-66	0.402458	0.336	0.212	4.67109700624837e-62	CERS4
1254	ENSG00000144228	1.51709872313347e-66	0.311473	0.397	0.257	5.52193593246119e-62	SPOPL
1255	ENSG00000124614	1.6984956437613e-66	-1.05718	0.33	0.409	6.18218444416239e-62	RPS10
1256	ENSG00000149806	2.81427772020638e-66	-0.791072	0.474	0.53	1.02434080460072e-61	FAU
1257	ENSG00000255571	3.2552385683303e-66	-2.55711	0.024	0.099	1.18484173410086e-61	MIR9-3HG
1258	ENSG00000169760	3.82861556069955e-66	0.195646	0.868	0.71	1.39353949178342e-61	NLGN1
1259	ENSG00000132639	4.46250844267692e-66	-0.372207	0.866	0.843	1.62426382296554e-61	SNAP25
1260	ENSG00000253618	4.55340843080507e-66	1.45223	0.048	0.013	1.65734960064443e-61	GRPEL2-AS1
1261	ENSG00000108641	4.56659690578242e-66	0.450481	0.215	0.119	1.66214994176669e-61	B9D1
1262	ENSG00000135048	6.11045501854114e-66	0.961478	0.093	0.037	2.22408341764861e-61	CEMIP2
1263	ENSG00000277734	7.31688671362992e-66	0.903399	0.094	0.038	2.66320042602702e-61	TRAC
1264	ENSG00000150636	9.46799980602756e-66	0.799342	0.113	0.05	3.44616256939791e-61	CCDC102B
1265	ENSG00000124171	1.15928173403698e-65	0.326425	0.4	0.259	4.21955365554779e-61	PARD6B
1266	ENSG00000136928	1.2032013350654e-65	0.224567	0.87	0.712	4.37941221937105e-61	GABBR2
1267	ENSG00000188687	1.23282958598927e-65	0.499592	0.224	0.126	4.48725312708373e-61	SLC4A5
1268	ENSG00000213981	1.25414922998517e-65	1.47678	0.038	0.009	4.56485236730003e-61
1269	ENSG00000140941	1.43273922279062e-65	-1.04629	0.26	0.354	5.2148842231133e-61	MAP1LC3B
1270	ENSG00000163697	1.58167503161747e-65	0.209253	0.451	0.297	5.75698078008125e-61	APBB2
1271	ENSG00000143933	1.97469347751794e-65	-0.698547	0.524	0.564	7.18748931946978e-61	CALM2
1272	ENSG00000123124	2.126992716828e-65	0.270234	0.454	0.302	7.74182809071054e-61	WWP1
1273	ENSG00000162415	2.95880386766729e-65	0.20822	0.628	0.451	1.07694543175354e-60	ZSWIM5
1274	ENSG00000105855	3.48569608756119e-65	-1.20285	0.228	0.326	1.26872366195052e-60	ITGB8
1275	ENSG00000071794	3.59616445155762e-65	0.266738	0.56	0.392	1.30893193707794e-60	HLTF
1276	ENSG00000263001	5.59894481052848e-65	-0.387726	0.818	0.794	2.03790393213616e-60	GTF2I
1277	ENSG00000106823	5.75246342034233e-65	0.849283	0.093	0.038	2.0937816357362e-60	ECM2
1278	ENSG00000117155	6.82417392768125e-65	-0.620616	0.626	0.64	2.48386282619742e-60	SSX2IP
1279	ENSG00000106809	7.25484647476043e-65	0.933512	0.085	0.033	2.6406190198833e-60	OGN
1280	ENSG00000196284	7.76415796533211e-65	0.205803	0.854	0.688	2.82599821622158e-60	SUPT3H
1281	ENSG00000243305	8.0383049104713e-65	1.18618	0.069	0.024	2.92578222131334e-60
1282	ENSG00000226471	1.73509504249806e-64	0.878188	0.09	0.036	6.31539893568443e-60
1283	ENSG00000266028	2.35458354647321e-64	0.80502	0.139	0.068	8.57021319245318e-60	SRGAP2
1284	ENSG00000162244	2.50044319118324e-64	-0.931445	0.424	0.484	9.10111312726876e-60	RPL29
1285	ENSG00000144560	2.79596652575634e-64	0.289453	0.492	0.337	1.01767589604479e-59	VGLL4
1286	ENSG00000183036	2.80180134184911e-64	0.721127	0.109	0.048	1.01979965240624e-59	PCP4
1287	ENSG00000069966	4.51533982624102e-64	0.272614	0.639	0.467	1.64349338995521e-59	GNB5
1288	ENSG00000196663	4.68010138934451e-64	0.438964	0.278	0.168	1.70346330369362e-59	TECPR2
1289	ENSG00000028203	4.91297041327656e-64	0.267316	0.603	0.433	1.7882229710244e-59	VEZT
1290	ENSG00000178750	5.79167132134558e-64	0.711143	0.126	0.059	2.10805252754337e-59	STX19
1291	ENSG00000132518	7.39177935448957e-64	0.477776	0.197	0.107	2.69045984944711e-59	GUCY2D
1292	ENSG00000144645	7.67883012169409e-64	1.0595	0.082	0.032	2.79494058769422e-59	OSBPL10
1293	ENSG00000177548	1.07867358064701e-63	1.02357	0.091	0.037	3.926156098839e-59	RABEP2
1294	ENSG00000081479	1.07970114306526e-63	0.223064	0.804	0.634	3.92989622052893e-59	LRP2
1295	ENSG00000135119	1.19234740058011e-63	0.646137	0.152	0.077	4.33990606863148e-59	RNFT2
1296	ENSG00000128271	1.20225708229507e-63	1.52862	0.057	0.018	4.37597532813761e-59	ADORA2A
1297	ENSG00000266903	1.35224398566293e-63	0.969648	0.095	0.039	4.92189765901593e-59	CEACAM16-AS1
1298	ENSG00000096060	1.45859773210406e-63	0.684522	0.14	0.068	5.30900402531234e-59	FKBP5
1299	ENSG00000234690	1.66754951663742e-63	-1.91403	0.063	0.15	6.0695467306569e-59	EPCAM-DT
1300	ENSG00000109339	1.8443867687479e-63	0.353965	0.361	0.233	6.71319896088862e-59	MAPK10
1301	ENSG00000121454	1.87474143852499e-63	-2.53734	0.028	0.102	6.82368388794328e-59	LHX4
1302	ENSG00000076944	2.17201814694502e-63	1.60972	0.044	0.012	7.90571165125048e-59	STXBP2
1303	ENSG00000130816	2.22329910133875e-63	0.481526	0.207	0.115	8.09236406905277e-59	DNMT1
1304	ENSG00000196230	3.19187490593222e-63	-1.15207	0.215	0.31	1.16177862826121e-58	TUBB
1305	ENSG00000179447	3.30492390842513e-63	2.02269	0.035	0.008	1.20292620418858e-58	SLC24A3-AS1
1306	ENSG00000118007	3.44047915380569e-63	-0.347386	0.914	0.89	1.25226560240219e-58	STAG1
1307	ENSG00000249593	4.20671089988803e-63	0.580459	0.161	0.083	1.53115863334125e-58
1308	ENSG00000170962	4.55526999396386e-63	0.662877	0.158	0.082	1.65802717240297e-58	PDGFD
1309	ENSG00000166949	4.94960222163849e-63	0.310758	0.316	0.196	1.80155621663198e-58	SMAD3
1310	ENSG00000141376	1.19245617279988e-62	-0.563189	0.709	0.719	4.34030197775702e-58	BCAS3
1311	ENSG00000164040	1.46931091007129e-62	-0.814749	0.428	0.486	5.34799785047746e-58	PGRMC2
1312	ENSG00000104332	1.54827539191158e-62	0.727817	0.16	0.083	5.63541277147976e-58	SFRP1
1313	ENSG00000182541	1.62946373773803e-62	0.706133	0.129	0.061	5.9309221126189e-58	LIMK2
1314	ENSG00000121481	1.65107961216407e-62	0.440502	0.216	0.122	6.0095995723548e-58	RNF2
1315	ENSG00000090238	1.87590767034026e-62	-1.29871	0.151	0.247	6.82792873850447e-58	YPEL3
1316	ENSG00000257894	1.94061689399607e-62	0.282379	0.514	0.358	7.06345737076688e-58
1317	ENSG00000265817	2.28363825863217e-62	0.460336	0.212	0.119	8.31198653376937e-58	FSBP
1318	ENSG00000148672	2.28413156579063e-62	0.294464	0.411	0.27	8.31378207316472e-58	GLUD1
1319	ENSG00000176473	2.99653480222631e-62	0.548256	0.188	0.103	1.09067873731433e-57	WDR25
1320	ENSG00000116035	5.57927752598975e-62	-2.04359	0.052	0.134	2.03074543390975e-57	VAX2
1321	ENSG00000157193	5.62770712731731e-62	-1.6147	0.089	0.18	2.04837284020096e-57	LRP8
1322	ENSG00000160145	6.89936467788506e-62	-0.441779	0.791	0.772	2.5112307554566e-57	KALRN
1323	ENSG00000226328	7.64404414226481e-62	0.738195	0.112	0.05	2.78227918690155e-57	NUP50-DT
1324	ENSG00000235450	8.86990396105833e-62	0.969725	0.083	0.033	3.22846764374601e-57
1325	ENSG00000130695	1.12681879045447e-61	0.749908	0.122	0.057	4.10139503349616e-57	CEP85
1326	ENSG00000287811	1.20172543504702e-61	0.504455	0.2	0.111	4.37404023848413e-57
1327	ENSG00000258683	1.37393494192218e-61	2.89903	0.016	0.001	5.00084840160837e-57
1328	ENSG00000159082	1.90558854815699e-61	0.302964	0.379	0.247	6.93596119758181e-57	SYNJ1
1329	ENSG00000106976	2.4084582167235e-61	0.29906	0.535	0.375	8.76630621723019e-57	DNM1
1330	ENSG00000198793	3.38225825237242e-61	0.344534	0.397	0.264	1.23107435869851e-56	MTOR
1331	ENSG00000156500	4.65536611526935e-61	0.711209	0.133	0.065	1.69446015863574e-56	PABIR3
1332	ENSG00000197535	4.80259373375138e-61	0.262614	0.534	0.373	1.74804806721083e-56	MYO5A
1333	ENSG00000137571	4.95629556962308e-61	-2.19714	0.038	0.115	1.80399246143141e-56	SLCO5A1
1334	ENSG00000077585	5.48929097091013e-61	0.299042	0.548	0.387	1.99799212759187e-56	GPR137B
1335	ENSG00000176595	5.81259977665757e-61	1.23164	0.063	0.022	2.11567006670782e-56	KBTBD11
1336	ENSG00000109107	8.78685194306091e-61	1.1416	0.066	0.023	3.19823837023531e-56	ALDOC
1337	ENSG00000108932	9.19186901944542e-61	1.16054	0.068	0.025	3.34565648569774e-56	SLC16A6
1338	ENSG00000156042	9.46131919851425e-61	0.737874	0.119	0.055	3.44373096187522e-56	CFAP70
1339	ENSG00000198087	1.09176217051644e-60	0.266694	0.441	0.297	3.97379594824574e-56	CD2AP
1340	ENSG00000117400	1.09418688883545e-60	2.4253	0.024	0.004	3.98262143798328e-56	MPL
1341	ENSG00000043355	1.13788993520001e-60	-2.7398	0.019	0.087	4.141691786141e-56	ZIC2
1342	ENSG00000112685	1.29348951193524e-60	0.256868	0.442	0.297	4.70804312554187e-56	EXOC2
1343	ENSG00000138760	1.47470217915007e-60	0.302769	0.572	0.414	5.36762099167042e-56	SCARB2
1344	ENSG00000101350	2.30097699660602e-60	0.375	0.329	0.21	8.37509607224658e-56	KIF3B
1345	ENSG00000257879	2.40838397691148e-60	4.66427	0.012	0.001	8.76603599916241e-56
1346	ENSG00000129295	2.43657868063126e-60	0.355377	0.254	0.151	8.86865908176167e-56	DNAAF11
1347	ENSG00000173905	2.56197993468269e-60	0.318121	0.432	0.295	9.32509456625805e-56	GOLIM4
1348	ENSG00000087253	2.75728609131366e-60	0.599999	0.158	0.083	1.00359699151635e-55	LPCAT2
1349	ENSG00000168028	2.77738865817281e-60	-0.830906	0.452	0.508	1.01091392380174e-55	RPSA
1350	ENSG00000151690	2.81432928335639e-60	0.629659	0.148	0.075	1.02435957255606e-55	MFSD6
1351	ENSG00000159214	2.85322530592904e-60	0.614696	0.138	0.068	1.03851694685205e-55	CCDC24
1352	ENSG00000146938	2.89052659730691e-60	-3.32273	0.014	0.079	1.05209387088777e-55	NLGN4X
1353	ENSG00000138764	4.16042313055061e-60	-0.741181	0.484	0.528	1.51431081105781e-55	CCNG2
1354	ENSG00000159433	4.73375494029512e-60	0.267934	0.514	0.359	1.72299212316862e-55	STARD9
1355	ENSG00000101040	4.9099811036258e-60	0.317671	0.386	0.255	1.78713492209772e-55	ZMYND8
1356	ENSG00000153936	5.31928330043997e-60	0.179405	0.579	0.411	1.93611273569414e-55	HS2ST1
1357	ENSG00000231985	6.3394217757496e-60	3.42076	0.016	0.002	2.30742273793734e-55
1358	ENSG00000232648	6.55950216902316e-60	0.710513	0.125	0.06	2.38752759948105e-55	ING2-DT
1359	ENSG00000134138	6.75158084887457e-60	-0.619562	0.772	0.758	2.45744039737337e-55	MEIS2
1360	ENSG00000100354	7.69389001427443e-60	0.21569	0.894	0.768	2.80042208739561e-55	TNRC6B
1361	ENSG00000180881	8.51297715888736e-60	0.314528	0.31	0.194	3.09855342629182e-55	CAPS2
1362	ENSG00000099331	8.6345028932513e-60	0.270917	0.633	0.465	3.14278636308561e-55	MYO9B
1363	ENSG00000139323	9.03534191251227e-60	0.293849	0.27	0.162	3.28868374931622e-55	POC1B
1364	ENSG00000278254	1.11911012949376e-59	2.74535	0.025	0.004	4.07333704933137e-55
1365	ENSG00000175054	1.45829499211425e-59	0.289465	0.38	0.25	5.30790211229745e-55	ATR
1366	ENSG00000079102	1.87201825640388e-59	-2.55166	0.027	0.098	6.81377204965885e-55	RUNX1T1
1367	ENSG00000152582	2.62065636924376e-59	0.420132	0.204	0.115	9.53866505277345e-55	SPEF2
1368	ENSG00000113805	3.00820277642424e-59	1.2111	0.059	0.02	1.0949256465629e-54	CNTN3
1369	ENSG00000133216	3.25532433989679e-59	-1.92375	0.057	0.138	1.18487295323563e-54	EPHB2
1370	ENSG00000153187	3.29146347595594e-59	-0.612348	0.537	0.568	1.19802687597844e-54	HNRNPU
1371	ENSG00000106819	3.46527882519791e-59	0.953007	0.085	0.034	1.26129218679554e-54	ASPN
1372	ENSG00000176390	4.25858193520456e-59	0.253305	0.488	0.338	1.55003865277575e-54	CRLF3
1373	ENSG00000143479	5.32403595318888e-59	0.5194	0.185	0.101	1.93784260624169e-54	DYRK3
1374	ENSG00000099991	5.40850121366222e-59	0.363013	0.315	0.199	1.96858627174878e-54	CABIN1
1375	ENSG00000230489	5.74082499148073e-59	3.08151	0.016	0.001	2.08954548039916e-54	VAV3-AS1
1376	ENSG00000245275	6.3007431615591e-59	0.542142	0.125	0.06	2.29334449594428e-54	SAP30L-AS1
1377	ENSG00000088538	6.63030629041321e-59	0.159691	0.488	0.334	2.4132988835846e-54	DOCK3
1378	ENSG00000087299	6.82108591536323e-59	0.30385	0.285	0.176	2.48273885147391e-54	L2HGDH
1379	ENSG00000072609	6.98913525626332e-59	0.568433	0.166	0.088	2.54390545057472e-54	CHFR
1380	ENSG00000183032	9.33099108004418e-59	0.75743	0.077	0.03	3.39629413331448e-54	SLC25A21
1381	ENSG00000060718	1.05368069980755e-58	-2.65368	0.026	0.095	3.83518701115954e-54	COL11A1
1382	ENSG00000259103	1.28822032108337e-58	0.549292	0.15	0.077	4.68886432467923e-54
1383	ENSG00000231304	1.79821540001555e-58	-1.73976	0.092	0.18	6.5451444129766e-54	SGO1-AS1
1384	ENSG00000231304	1.79821540001555e-58	-1.73976	0.092	0.18	6.5451444129766e-54	SGO1-AS1
1385	ENSG00000226124	2.10271891142587e-58	1.99213	0.029	0.006	7.65347629380788e-54	FTCDNL1
1386	ENSG00000279078	2.12449843699086e-58	0.534987	0.155	0.08	7.73274941095932e-54	SND1-IT1
1387	ENSG00000124507	2.20630929230775e-58	0.264654	0.392	0.258	8.03052456214174e-54	PACSIN1
1388	ENSG00000162889	2.62788696056612e-58	0.973529	0.083	0.034	9.56498295906855e-54	MAPKAPK2
1389	ENSG00000118690	2.86144726063974e-58	0.427615	0.223	0.13	1.04150957392765e-53	ARMC2
1390	ENSG00000135269	3.0070421829971e-58	0.535315	0.146	0.074	1.09450321376729e-53	TES
1391	ENSG00000267475	4.30218258786438e-58	2.83138	0.018	0.002	1.56590841833088e-53	NUDT19-DT
1392	ENSG00000172058	4.52128170569247e-58	0.809902	0.095	0.041	1.64565611523794e-53	SERF1A
1393	ENSG00000171055	4.72851549381012e-58	0.278685	0.453	0.309	1.72108506943701e-53	FEZ2
1394	ENSG00000196123	5.51234421300062e-58	0.657983	0.146	0.075	2.00638304664797e-53	MATCAP1
1395	ENSG00000258084	6.21997039457869e-58	3.23856	0.014	0.001	2.26394482421875e-53
1396	ENSG00000196498	6.62430846739236e-58	-0.912055	0.339	0.41	2.41111579596147e-53	NCOR2
1397	ENSG00000167757	7.764156721007e-58	3.2414	0.017	0.002	2.82599776331213e-53	KLK11
1398	ENSG00000073060	7.77443122224755e-58	0.778208	0.103	0.046	2.82973747627366e-53	SCARB1
1399	ENSG00000218839	1.09219432335474e-57	1.34287	0.048	0.014	3.9753688981466e-53	FAM138C
1400	ENSG00000177990	1.41137179190168e-57	0.491214	0.185	0.102	5.13711104816373e-53	DPY19L2
1401	ENSG00000133026	1.61321440712798e-57	0.248284	0.665	0.495	5.87177779906441e-53	MYH10
1402	ENSG00000186326	1.95891296157546e-57	3.20661	0.015	0.001	7.13005139754236e-53	RGS9BP
1403	ENSG00000150764	2.04092713827319e-57	0.336602	0.289	0.181	7.42856659788676e-53	DIXDC1
1404	ENSG00000123358	2.09337432374928e-57	1.91469	0.035	0.009	7.61946386358261e-53	NR4A1
1405	ENSG00000132434	2.09741211349011e-57	0.329821	0.3	0.188	7.63416061068129e-53	LANCL2
1406	ENSG00000110274	2.72180287335041e-57	0.27785	0.506	0.356	9.90681809842082e-53	CEP164
1407	ENSG00000170634	5.89794545056052e-57	0.210111	0.644	0.481	2.14673418509502e-52	ACYP2
1408	ENSG00000164830	5.97909196790677e-57	0.15478	0.513	0.364	2.17626989447871e-52	OXR1
1409	ENSG00000111879	5.98153024614723e-57	0.221419	0.479	0.331	2.17715737899267e-52	FAM184A
1410	ENSG00000130477	8.53628532329283e-57	0.477867	0.208	0.12	3.10703713197212e-52	UNC13A
1411	ENSG00000112599	1.13438694081874e-56	1.02015	0.066	0.024	4.12894158719203e-52	GUCA1B
1412	ENSG00000233048	1.20615886947767e-56	2.52698	0.021	0.003	4.39017705312484e-52	LINC01722
1413	ENSG00000120738	1.21171282992921e-56	1.47519	0.08	0.033	4.41039235837633e-52	EGR1
1414	ENSG00000102753	1.33683783985527e-56	0.199549	0.729	0.558	4.86582236950522e-52	KPNA3
1415	ENSG00000167978	1.4383371294886e-56	-0.788442	0.389	0.453	5.23525948391261e-52	SRRM2
1416	ENSG00000123684	1.46740210845242e-56	0.245716	0.442	0.301	5.34105019434513e-52	LPGAT1
1417	ENSG00000115353	1.93765734964969e-56	0.719987	0.09	0.039	7.05268522125495e-52	TACR1
1418	ENSG00000109846	2.13758432151978e-56	0.918242	0.074	0.029	7.78037941346771e-52	CRYAB
1419	ENSG00000178188	2.77294802507062e-56	0.486093	0.207	0.119	1.0092976221652e-51	SH2B1
1420	ENSG00000154118	2.99656299439733e-56	0.677831	0.118	0.057	1.09068899870074e-51	JPH3
1421	ENSG00000254115	3.38702145395295e-56	2.86948	0.019	0.003	1.23280806880979e-51
1422	ENSG00000151726	3.66303630950811e-56	0.337937	0.226	0.133	1.33327195593476e-51	ACSL1
1423	ENSG00000129317	4.21495514677748e-56	0.331344	0.305	0.193	1.53415937432407e-51	PUS7L
1424	ENSG00000198468	4.28803415216947e-56	1.29959	0.048	0.015	1.56075867070665e-51	FLVCR1-DT
1425	ENSG00000138821	4.43568439472038e-56	-1.4835	0.114	0.202	1.61450040599033e-51	SLC39A8
1426	ENSG00000259929	4.53137454502279e-56	-3.53656	0.009	0.066	1.64932970689739e-51
1427	ENSG00000115904	5.14500074245204e-56	0.219025	0.546	0.388	1.87267737023769e-51	SOS1
1428	ENSG00000093144	5.64882333248133e-56	0.329435	0.251	0.152	2.05605871655656e-51	ECHDC1
1429	ENSG00000144031	6.15706072677917e-56	0.347489	0.276	0.171	2.24104696333308e-51	ANKRD53
1430	ENSG00000104967	6.26721971421538e-56	0.841322	0.09	0.039	2.28114263158011e-51	NOVA2
1431	ENSG00000198846	6.30734369983253e-56	0.191839	0.866	0.718	2.29574695986504e-51	TOX
1432	ENSG00000198399	6.42281079807109e-56	0.213289	0.448	0.305	2.33777467428191e-51	ITSN2
1433	ENSG00000127249	6.72491426912601e-56	1.10815	0.06	0.021	2.44773429567648e-51	ATP13A4
1434	ENSG00000088808	7.1850458488447e-56	0.314137	0.277	0.172	2.61521298806249e-51	PPP1R13B
1435	ENSG00000174373	7.18733831314712e-56	0.20832	0.844	0.686	2.61604739921929e-51	RALGAPA1
1436	ENSG00000175906	7.95175591392042e-56	0.33953	0.523	0.379	2.89428011754875e-51	ARL4D
1437	ENSG00000060709	8.9330022974128e-56	0.235495	0.662	0.495	3.25143417621231e-51	RIMBP2
1438	ENSG00000256771	9.71708084151951e-56	0.245578	0.591	0.432	3.53682308469627e-51	ZNF253
1439	ENSG00000138777	1.00899980376754e-55	0.245874	0.356	0.232	3.6725574857531e-51	PPA2
1440	ENSG00000105373	1.02832558323269e-55	-1.52928	0.107	0.193	3.74289945785033e-51	NOP53
1441	ENSG00000254986	1.1247945742027e-55	0.798115	0.083	0.035	4.09402729118298e-51	DPP3
1442	ENSG00000175544	1.24529356906395e-55	0.788534	0.088	0.038	4.53261953267895e-51	CABP4
1443	ENSG00000145920	1.35164030157241e-55	-2.24889	0.031	0.1	4.91970036966324e-51	CPLX2
1444	ENSG00000110514	1.42225346649227e-55	0.342451	0.289	0.181	5.17671816733857e-51	MADD
1445	ENSG00000150527	1.75758703302294e-55	0.386297	0.216	0.127	6.39726528279689e-51	MIA2
1446	ENSG00000166689	1.92476010437424e-55	0.202259	0.859	0.708	7.00574182790137e-51	PLEKHA7
1447	ENSG00000054793	2.14373247871566e-55	0.336159	0.323	0.209	7.80275747602925e-51	ATP9A
1448	ENSG00000140455	2.24100103373212e-55	0.234164	0.681	0.517	8.15679556257818e-51	USP3
1449	ENSG00000087460	2.56892710430527e-55	-1.01312	0.269	0.351	9.35038087425032e-51	GNAS
1450	ENSG00000109452	2.64632651343017e-55	0.993951	0.074	0.029	9.63209924358314e-51	INPP4B
1451	ENSG00000075624	2.85139070440448e-55	-1.04454	0.257	0.339	1.03784918858914e-50	ACTB
1452	ENSG00000133401	2.99130214370646e-55	0.202674	0.797	0.639	1.08877415426628e-50	PDZD2
1453	ENSG00000117151	3.3704513716019e-55	-1.11861	0.22	0.304	1.22677689023566e-50	CTBS
1454	ENSG00000226017	3.49213507739758e-55	0.48214	0.181	0.101	1.27106732547117e-50	PRICKLE2-AS3
1455	ENSG00000110497	3.60090217150779e-55	0.230437	0.702	0.534	1.3106563723854e-50	AMBRA1
1456	ENSG00000157570	3.78139797920183e-55	0.617987	0.14	0.072	1.37635323646988e-50	TSPAN18
1457	ENSG00000147133	4.17131951159609e-55	0.296998	0.304	0.194	1.51827687583074e-50	TAF1
1458	ENSG00000115902	4.36504016331606e-55	0.925922	0.075	0.03	1.58878731864378e-50	SLC1A4
1459	ENSG00000182446	4.46058546265221e-55	0.324058	0.369	0.246	1.62356389669615e-50	NPLOC4
1460	ENSG00000275183	6.02995810198786e-55	0.75513	0.11	0.052	2.19478414996154e-50	LENG9
1461	ENSG00000174021	6.3654222472351e-55	-1.56872	0.079	0.161	2.31688638954863e-50	GNG5
1462	ENSG00000268906	6.49479352366313e-55	3.50635	0.014	0.001	2.36397494674291e-50
1463	ENSG00000171604	7.37728494891785e-55	-1.13283	0.183	0.272	2.68518417570712e-50	CXXC5
1464	ENSG00000181291	9.54631978633016e-55	1.3511	0.053	0.017	3.47466947582845e-50	TMEM132E
1465	ENSG00000234900	1.05593109149455e-54	1.75959	0.03	0.007	3.84337798682185e-50
1466	ENSG00000189221	1.07277659096089e-54	0.254817	0.45	0.309	3.90469223577945e-50	MAOA
1467	ENSG00000197555	1.08652197013334e-54	0.318332	0.284	0.18	3.95472266689131e-50	SIPA1L1
1468	ENSG00000109756	1.10768553277127e-54	0.241334	0.763	0.604	4.03175380218087e-50	RAPGEF2
1469	ENSG00000185630	1.2129844057027e-54	-0.619941	0.609	0.632	4.41502063987668e-50	PBX1
1470	ENSG00000170266	1.30891803676138e-54	0.60138	0.148	0.078	4.76419987020409e-50	GLB1
1471	ENSG00000154262	1.32136483153708e-54	0.845184	0.067	0.025	4.80950371382868e-50	ABCA6
1472	ENSG00000050393	1.50218970463166e-54	0.798631	0.1	0.045	5.46767008691832e-50	MCUR1
1473	ENSG00000171681	1.61741626265195e-54	-0.446091	0.746	0.744	5.88707171280055e-50	ATF7IP
1474	ENSG00000123352	2.16417013295376e-54	-1.43125	0.126	0.213	7.87714644992509e-50	SPATS2
1475	ENSG00000272368	3.48550515406009e-54	0.370519	0.243	0.147	1.26865416597479e-49
1476	ENSG00000124225	4.89338368489915e-54	-1.29569	0.139	0.228	1.78109379362959e-49	PMEPA1
1477	ENSG00000132437	5.41009098141368e-54	2.58579	0.019	0.003	1.96916491541495e-49	DDC
1478	ENSG00000141568	5.88018884118397e-54	0.310617	0.332	0.217	2.14027113441414e-49	FOXK2
1479	ENSG00000152242	6.07603793541445e-54	0.27537	0.347	0.229	2.21155628773215e-49	C18orf25
1480	ENSG00000233654	6.42637314484893e-54	0.585144	0.126	0.063	2.33907129726211e-49	NEMP2-DT
1481	ENSG00000253320	7.7322475933012e-54	0.373951	0.272	0.172	2.81438347900977e-49	MAILR
1482	ENSG00000138386	8.28006181644121e-54	0.289477	0.24	0.144	3.01377689994827e-49	NAB1
1483	ENSG00000287048	8.67621874707452e-54	2.08399	0.026	0.005	3.15797009956018e-49
1484	ENSG00000184698	9.27045406578503e-54	3.93562	0.012	0.001	3.37425987086444e-49	OR51M1
1485	ENSG00000153066	9.51645659632159e-54	0.349568	0.248	0.151	3.46379987192913e-49	TXNDC11
1486	ENSG00000160563	1.115213580101e-53	0.216626	0.54	0.384	4.05915438885161e-49	MED27
1487	ENSG00000119772	1.27553102069481e-53	0.262802	0.579	0.422	4.64267780912496e-49	DNMT3A
1488	ENSG00000120802	1.36544975494792e-53	-0.917819	0.294	0.374	4.96996401805945e-49	TMPO
1489	ENSG00000100412	1.60566289398714e-53	0.403576	0.234	0.142	5.8442918015344e-49	ACO2
1490	ENSG00000140416	1.64965821447467e-53	0.683111	0.124	0.062	6.00442596904492e-49	TPM1
1491	ENSG00000000457	1.80922021302361e-53	0.293464	0.32	0.206	6.58519973136334e-49	SCYL3
1492	ENSG00000197601	2.13544239870611e-53	0.183764	0.438	0.297	7.77258324281049e-49	FAR1
1493	ENSG00000154274	2.56839800829928e-53	1.95167	0.027	0.006	9.34845507060772e-49	C4orf19
1494	ENSG00000083123	2.61349976013803e-53	0.20362	0.372	0.247	9.51261642695039e-49	BCKDHB
1495	ENSG00000117971	2.78109709594392e-53	-0.959988	0.314	0.388	1.01226372098167e-48	CHRNB4
1496	ENSG00000182247	2.94920612079443e-53	0.145083	0.838	0.659	1.07345204384676e-48	UBE2E2
1497	ENSG00000173976	2.98990981199782e-53	0.240926	0.474	0.327	1.08826737337097e-48	RAX2
1498	ENSG00000226696	3.30803024173869e-53	0.412756	0.187	0.105	1.20405684738805e-48	LENG8-AS1
1499	ENSG00000184949	3.5312099291968e-53	0.413464	0.239	0.145	1.28528979002905e-48	FAM227A
1500	ENSG00000149292	3.74517537217002e-53	0.485516	0.155	0.083	1.36316893196244e-48	TTC12
1501	ENSG00000223436	4.01678751371306e-53	2.0615	0.022	0.004	1.46203031924128e-48
1502	ENSG00000165521	4.43367818412298e-53	0.190494	0.697	0.524	1.61377018545708e-48	EML5
1503	ENSG00000131469	4.52491915287315e-53	-0.958243	0.323	0.395	1.64698007326277e-48	RPL27
1504	ENSG00000114346	4.99525914909625e-53	0.364076	0.212	0.125	1.81817442508805e-48	ECT2
1505	ENSG00000111880	5.37649576784174e-53	0.186244	0.731	0.556	1.95693692957904e-48	RNGTT
1506	ENSG00000176788	5.52718993676014e-53	-1.58058	0.093	0.175	2.01178659318196e-48	BASP1
1507	ENSG00000132334	7.35843697900543e-53	-2.48488	0.03	0.096	2.6783238916184e-48	PTPRE
1508	ENSG00000178125	1.16695971192069e-52	1.19377	0.054	0.019	4.24749995944893e-48	PPP1R42
1509	ENSG00000139644	1.32636454131342e-52	-0.836262	0.298	0.378	4.82770165747259e-48	TMBIM6
1510	ENSG00000221947	1.58466803401574e-52	1.26536	0.043	0.013	5.76787471021047e-48	XKR9
1511	ENSG00000280739	1.98165794086989e-52	0.34393	0.202	0.118	7.21283857317821e-48	EIF1B-AS1
1512	ENSG00000272078	2.06856215776025e-52	0.406051	0.198	0.114	7.52915254181575e-48
1513	ENSG00000236404	2.07824459790324e-52	0.325287	0.238	0.145	7.56439468744822e-48	VLDLR-AS1
1514	ENSG00000070159	2.60054352669715e-52	2.41624	0.024	0.004	9.46545832847228e-48	PTPN3
1515	ENSG00000140025	2.68441626901509e-52	0.350389	0.253	0.157	9.77073833596114e-48	EFCAB11
1516	ENSG00000175061	2.735915861567e-52	-0.946201	0.327	0.393	9.95818655293157e-48	SNHG29
1517	ENSG00000144674	3.1414560585424e-52	0.205559	0.757	0.594	1.14342717618826e-47	GOLGA4
1518	ENSG00000169519	3.6117178273696e-52	0.158419	0.46	0.318	1.31459305480599e-47	METTL15
1519	ENSG00000221983	3.61991120254965e-52	-0.984482	0.314	0.384	1.31757527950402e-47	UBA52
1520	ENSG00000154153	4.02107538441419e-52	0.824336	0.102	0.048	1.46359101841908e-47	RETREG1
1521	ENSG00000166398	4.98745810476397e-52	0.242747	0.494	0.351	1.81533500097199e-47	GARRE1
1522	ENSG00000112186	5.43956011037506e-52	0.655332	0.119	0.059	1.97989108897431e-47	CAP2
1523	ENSG00000109771	6.42764469099206e-52	0.396111	0.201	0.117	2.33953411462729e-47	LRP2BP
1524	ENSG00000198888	8.27059857259776e-52	-1.14882	0.341	0.407	3.01033246845413e-47	MT-ND1
1525	ENSG00000068878	9.5544820138471e-52	0.232054	0.389	0.263	3.47764036340007e-47	PSME4
1526	ENSG00000228351	9.72689257955583e-52	1.1344	0.056	0.02	3.54039436110673e-47
1527	ENSG00000270571	1.12455628547407e-51	0.80975	0.065	0.025	4.09315996786852e-47
1528	ENSG00000140396	1.27629191342629e-51	0.156332	0.96	0.876	4.64544730648902e-47	NCOA2
1529	ENSG00000276115	2.27375617802647e-51	0.726184	0.109	0.052	8.27601773678075e-47
1530	ENSG00000227165	2.27758328932481e-51	0.548581	0.128	0.066	8.28994765648444e-47	WDR11-DT
1531	ENSG00000080561	2.28439736561649e-51	1.28647	0.046	0.015	8.31474953137091e-47	MID2
1532	ENSG00000070614	2.4934450042555e-51	0.75684	0.096	0.044	9.07564112648916e-47	NDST1
1533	ENSG00000143995	2.69220494035178e-51	0.182911	0.924	0.819	9.79908754189242e-47	MEIS1
1534	ENSG00000172728	2.97475491269128e-51	0.326674	0.244	0.15	1.08275129312137e-46	FUT10
1535	ENSG00000226383	2.98682784372809e-51	0.890538	0.084	0.037	1.08714559856015e-46	LINC01876
1536	ENSG00000164542	3.00192896615091e-51	0.252438	0.311	0.2	1.09264210509961e-46	MATCAP2
1537	ENSG00000119314	3.1336516066007e-51	0.212008	0.498	0.352	1.14058651177052e-46	PTBP3
1538	ENSG00000236197	3.39412499774332e-51	0.229292	0.464	0.322	1.23539361667861e-46	PPP1R9A-AS1
1539	ENSG00000172179	3.48630683787337e-51	1.11452	0.052	0.018	1.26894596284915e-46	PRL
1540	ENSG00000164136	3.8411129844419e-51	1.43641	0.042	0.013	1.39808830407716e-46	IL15
1541	ENSG00000104450	4.2635474262742e-51	0.549301	0.11	0.053	1.55184599221528e-46	SPAG1
1542	ENSG00000084733	4.43626269004738e-51	0.254875	0.474	0.338	1.61471089392344e-46	RAB10
1543	ENSG00000231236	5.36187846588498e-51	-3.14934	0.009	0.063	1.95161652401282e-46
1544	ENSG00000260135	5.99625753453132e-51	1.36923	0.038	0.011	2.18251781741871e-46	MMP2-AS1
1545	ENSG00000081189	6.31780198603713e-51	1.06634	0.066	0.026	2.2995535668778e-46	MEF2C
1546	ENSG00000132122	6.57633069796143e-51	0.173458	0.418	0.286	2.393652847444e-46	SPATA6
1547	ENSG00000111961	6.72655081253143e-51	-1.61879	0.07	0.148	2.44832996474519e-46	SASH1
1548	ENSG00000131018	9.60591770194242e-51	0.350734	0.21	0.125	3.496361925153e-46	SYNE1
1549	ENSG00000157827	1.03312023779881e-50	0.215944	0.492	0.351	3.7603510415401e-46	FMNL2
1550	ENSG00000221823	1.04563642566763e-50	0.180837	0.701	0.532	3.80590746214505e-46	PPP3R1
1551	ENSG00000139668	1.20249579762903e-50	0.22946	0.374	0.252	4.37684420421015e-46	WDFY2
1552	ENSG00000175175	1.29040462388322e-50	0.146257	0.646	0.483	4.69681475001014e-46	PPM1E
1553	ENSG00000241973	1.30425206229561e-50	0.239571	0.41	0.282	4.74721665634357e-46	PI4KA
1554	ENSG00000250903	1.33800321421615e-50	0.186967	0.467	0.329	4.87006409910395e-46	GMDS-DT
1555	ENSG00000196517	1.34942020857263e-50	0.376432	0.232	0.141	4.91161967516264e-46	SLC6A9
1556	ENSG00000162706	1.56956829839805e-50	-2.01032	0.043	0.111	5.71291469250922e-46	CADM3
1557	ENSG00000250116	1.60289241558471e-50	0.859426	0.081	0.035	5.83420781424524e-46	RHOQ-AS1
1558	ENSG00000148925	1.73232857937481e-50	0.278294	0.277	0.176	6.30532956320844e-46	BTBD10
1559	ENSG00000205562	1.86959627421042e-50	3.59262	0.012	0.001	6.80495651887108e-46	FLRT2-AS1
1560	ENSG00000156398	1.99083966474361e-50	0.588423	0.142	0.076	7.24625821173378e-46	SFXN2
1561	ENSG00000105438	2.17338214531151e-50	-1.21681	0.139	0.224	7.91067633250482e-46	KDELR1
1562	ENSG00000036530	2.20838232662493e-50	0.343521	0.25	0.155	8.03806999244941e-46	CYP46A1
1563	ENSG00000198648	2.36038980654064e-50	0.216788	0.59	0.444	8.59134681784664e-46	STK39
1564	ENSG00000243083	2.47422685922806e-50	1.40104	0.046	0.015	9.00569092221828e-46	LINC00870
1565	ENSG00000015153	2.76373764126872e-50	0.195577	0.659	0.498	1.00594522666899e-45	YAF2
1566	ENSG00000154380	3.09465138238526e-50	-0.605109	0.606	0.618	1.12639121016059e-45	ENAH
1567	ENSG00000198053	3.38645241584085e-50	1.09957	0.059	0.022	1.23260095031775e-45	SIRPA
1568	ENSG00000197077	3.42015704749493e-50	0.454858	0.171	0.096	1.2448687621472e-45	KIAA1671
1569	ENSG00000197748	3.65196211062938e-50	0.433988	0.172	0.097	1.32924116902688e-45	CFAP43
1570	ENSG00000124140	4.03930631969835e-50	0.545388	0.151	0.082	1.47022671424381e-45	SLC12A5
1571	ENSG00000159842	4.26073957953456e-50	0.546016	0.172	0.098	1.55082399215899e-45	ABR
1572	ENSG00000139117	4.6454248674742e-50	1.28002	0.044	0.014	1.69084174326326e-45	CPNE8
1573	ENSG00000054356	4.78004507119605e-50	1.40509	0.051	0.017	1.73984080501394e-45	PTPRN
1574	ENSG00000137726	5.29899805655929e-50	-2.27908	0.026	0.087	1.92872931262645e-45	FXYD6
1575	ENSG00000144468	5.42687102740768e-50	0.19348	0.317	0.206	1.97527251655585e-45	RHBDD1
1576	ENSG00000286380	6.58295545400309e-50	0.936159	0.074	0.031	2.39606412614804e-45
1577	ENSG00000179314	7.18129407961814e-50	-1.27769	0.131	0.215	2.61384741909941e-45	WSCD1
1578	ENSG00000099814	7.99649710030873e-50	1.38922	0.041	0.012	2.91056501457037e-45	CEP170B
1579	ENSG00000115109	8.6933993122747e-50	0.200441	0.718	0.556	3.16422348168174e-45	EPB41L5
1580	ENSG00000274020	8.97101657170615e-50	0.731774	0.1	0.047	3.2652706117696e-45	LINC01138
1581	ENSG00000160613	9.53748490897161e-50	0.420119	0.177	0.101	3.47145375716749e-45	PCSK7
1582	ENSG00000287125	1.11253355521936e-49	0.634735	0.113	0.056	4.04939963428744e-45
1583	ENSG00000227036	1.21293790889964e-49	-3.17002	0.013	0.067	4.41485140081291e-45	LINC00511
1584	ENSG00000227036	1.21293790889964e-49	-3.17002	0.013	0.067	4.41485140081291e-45	LINC00511
1585	ENSG00000184178	1.24256741441104e-49	0.132375	0.404	0.275	4.5226968749733e-45	SCFD2
1586	ENSG00000164176	1.26090656157465e-49	-2.15818	0.046	0.114	4.58944770281942e-45	EDIL3
1587	ENSG00000255159	1.45348985996958e-49	0.880416	0.078	0.033	5.29041239231727e-45	DENND2B-AS1
1588	ENSG00000170310	1.46900130325607e-49	0.291545	0.328	0.22	5.34687094359145e-45	STX8
1589	ENSG00000270344	1.58836677068062e-49	0.741944	0.095	0.044	5.78133737192331e-45	POC1B-AS1
1590	ENSG00000140950	2.11411131243887e-49	0.464357	0.165	0.092	7.694942355015e-45	MEAK7
1591	ENSG00000155846	2.32612581534524e-49	1.66467	0.038	0.011	8.4666327426936e-45	PPARGC1B
1592	ENSG00000156642	2.45234881902846e-49	0.208675	0.443	0.307	8.9260592314998e-45	NPTN
1593	ENSG00000140105	2.58367856617841e-49	0.472326	0.169	0.095	9.40407324517618e-45	WARS1
1594	ENSG00000206560	2.73555719693383e-49	0.175584	0.579	0.423	9.95688108539975e-45	ANKRD28
1595	ENSG00000163624	2.98594111464695e-49	0.783375	0.08	0.035	1.0868228469092e-44	CDS1
1596	ENSG00000203780	3.18144387407607e-49	0.378074	0.176	0.101	1.15798194128621e-44	FANK1
1597	ENSG00000183864	3.43403324220362e-49	0.266604	0.378	0.256	1.24991941949727e-44	TOB2
1598	ENSG00000169084	4.00137442390384e-49	0.225597	0.416	0.289	1.45642026281252e-44	DHRSX
1599	ENSG00000184500	4.03341849467858e-49	0.50907	0.147	0.08	1.46808366369311e-44	PROS1
1600	ENSG00000158470	4.06480858672629e-49	0.395926	0.204	0.122	1.47950902939663e-44	B4GALT5
1601	ENSG00000145741	4.79875663039808e-49	-0.935843	0.28	0.355	1.74665143833229e-44	BTF3
1602	ENSG00000170296	5.64879656714757e-49	-1.0227	0.228	0.308	2.05604897451037e-44	GABARAP
1603	ENSG00000118263	7.84186735256235e-49	-1.51902	0.079	0.156	2.85428287898565e-44	KLF7
1604	ENSG00000225313	9.06888251318528e-49	0.382825	0.203	0.12	3.30089185714918e-44
1605	ENSG00000166086	9.13892973547058e-49	0.192603	0.571	0.415	3.32638764511658e-44	JAM3
1606	ENSG00000175662	9.55274635177921e-49	0.207901	0.465	0.327	3.4770086171206e-44	TOM1L2
1607	ENSG00000168615	9.8999308264586e-49	0.219514	0.348	0.232	3.6033768222144e-44	ADAM9
1608	ENSG00000287168	1.02214355653146e-48	0.659966	0.114	0.057	3.7203981170632e-44
1609	ENSG00000254757	1.3311175554573e-48	1.95366	0.025	0.005	4.84500167835348e-44
1610	ENSG00000138101	1.36300757861075e-48	0.202797	0.441	0.31	4.96107498462742e-44	DTNB
1611	ENSG00000173064	1.43979017993518e-48	0.2127	0.676	0.512	5.24054829692805e-44	HECTD4
1612	ENSG00000086666	1.53777116576323e-48	0.183911	0.63	0.471	5.59717948914502e-44	ZFAND6
1613	ENSG00000163864	1.54957009646538e-48	0.230845	0.294	0.19	5.64012523711468e-44	NMNAT3
1614	ENSG00000123094	1.62705381885834e-48	-0.882113	0.421	0.471	5.92215048988059e-44	RASSF8
1615	ENSG00000214595	2.19660454802627e-48	0.317784	0.195	0.115	7.995201233906e-44	EML6
1616	ENSG00000095951	2.29681421841037e-48	0.438022	0.158	0.088	8.35994439217006e-44	HIVEP1
1617	ENSG00000140319	2.45860393067647e-48	-0.732599	0.378	0.44	8.94882658687623e-44	SRP14
1618	ENSG00000185238	2.54933572339534e-48	0.295819	0.162	0.091	9.27907216601438e-44	PRMT3
1619	ENSG00000189195	3.28461055984903e-48	-0.486054	0.682	0.682	1.19553255157385e-43	BTBD8
1620	ENSG00000101079	3.35748537820491e-48	0.21969	0.568	0.419	1.22205752795902e-43	NDRG3
1621	ENSG00000204815	4.00915927284393e-48	0.658276	0.094	0.044	1.45925379212974e-43	ODAD4
1622	ENSG00000155629	4.02781637539362e-48	0.727606	0.099	0.047	1.46604460431577e-43	PIK3AP1
1623	ENSG00000075420	4.78094935859972e-48	0.15997	0.533	0.379	1.74016994754313e-43	FNDC3B
1624	ENSG00000173421	5.24579282544065e-48	0.980913	0.068	0.028	1.90936367260389e-43	IHO1
1625	ENSG00000104447	5.60508194631565e-48	0.14923	0.382	0.261	2.04013772681997e-43	TRPS1
1626	ENSG00000173065	6.06705443495516e-48	0.258909	0.357	0.245	2.20828647323498e-43	FAM222B
1627	ENSG00000136026	6.13123435499172e-48	-0.779248	0.343	0.412	2.23164668052989e-43	CKAP4
1628	ENSG00000151914	6.6839688881352e-48	-0.309838	0.906	0.873	2.43283099590345e-43	DST
1629	ENSG00000164074	7.26513644109793e-48	0.20393	0.353	0.239	2.64436436183082e-43	ABHD18
1630	ENSG00000197061	7.84299998515385e-48	-0.731771	0.433	0.48	2.8546951345963e-43	H4C3
1631	ENSG00000197061	7.84299998515385e-48	-0.731771	0.433	0.48	2.8546951345963e-43	H4C3
1632	ENSG00000272677	8.02225618490386e-48	0.449604	0.142	0.076	2.91994080618131e-43	HNRNPD-DT
1633	ENSG00000141068	8.15871557796148e-48	0.22261	0.444	0.312	2.96960929606642e-43	KSR1
1634	ENSG00000213593	8.76703405064394e-48	0.265667	0.32	0.211	3.19102505375338e-43	TMX2
1635	ENSG00000174444	9.61220337186708e-48	-0.939407	0.341	0.401	3.49864978329218e-43	RPL4
1636	ENSG00000047634	1.1449326291983e-47	0.365089	0.227	0.14	4.16732578375596e-43	SCML1
1637	ENSG00000032389	1.34454681024399e-47	0.336544	0.213	0.129	4.89388147992609e-43	EIPR1
1638	ENSG00000127743	1.55395015083657e-47	2.14935	0.021	0.004	5.65606775901493e-43	IL17B
1639	ENSG00000230817	1.58739751462271e-47	0.942387	0.055	0.02	5.77780947372373e-43	LINC01362
1640	ENSG00000163637	1.72320347675069e-47	0.149414	0.942	0.834	6.27211601467714e-43	PRICKLE2
1641	ENSG00000050730	1.7321512541083e-47	3.83929	0.012	0.001	6.30468413470338e-43	TNIP3
1642	ENSG00000172164	1.82207627401466e-47	2.32069	0.024	0.005	6.63199322215855e-43	SNTB1
1643	ENSG00000099992	1.87496868320334e-47	0.708142	0.084	0.038	6.82451101312352e-43	TBC1D10A
1644	ENSG00000164327	1.91327611955469e-47	0.219982	0.827	0.682	6.96394241995517e-43	RICTOR
1645	ENSG00000276023	2.40216172258923e-47	0.977972	0.073	0.031	8.7433882378803e-43	DUSP14
1646	ENSG00000141198	2.49312371749177e-47	0.335504	0.224	0.137	9.07447170692656e-43	TOM1L1
1647	ENSG00000117501	2.5495361282203e-47	-2.8061	0.012	0.064	9.27980159949626e-43	MROH9
1648	ENSG00000152484	2.68453668725221e-47	0.172905	0.422	0.291	9.77117663426058e-43	USP12
1649	ENSG00000131504	2.72583462383772e-47	0.450354	0.147	0.081	9.92149286384454e-43	DIAPH1
1650	ENSG00000160991	3.48253391850385e-47	0.662226	0.124	0.065	1.26757269565703e-42	ORAI2
1651	ENSG00000171492	3.55507326191597e-47	0.24208	0.292	0.19	1.29397556587218e-42	LRRC8D
1652	ENSG00000232104	3.64184750967494e-47	0.281063	0.258	0.164	1.32555965657148e-42	RFX3-DT
1653	ENSG00000116747	3.98049448573788e-47	0.250569	0.367	0.25	1.44882038291887e-42	RO60
1654	ENSG00000130255	4.15912383705932e-47	-0.969568	0.317	0.382	1.51383789421285e-42	RPL36
1655	ENSG00000070759	4.24112626224481e-47	0.695732	0.084	0.038	1.54368513693187e-42	TESK2
1656	ENSG00000257191	4.46606208299232e-47	0.189982	0.499	0.358	1.62555727696755e-42
1657	ENSG00000052126	5.33358254265077e-47	0.153055	0.905	0.783	1.94131737387403e-42	PLEKHA5
1658	ENSG00000164953	5.68538182630224e-47	0.243751	0.284	0.184	2.06936527713749e-42	TMEM67
1659	ENSG00000089157	5.80895193842466e-47	-0.848024	0.452	0.49	2.11434232654781e-42	RPLP0
1660	ENSG00000120055	6.0355604708541e-47	2.22259	0.021	0.004	2.19682330018147e-42	C10orf95
1661	ENSG00000116754	7.68293736651143e-47	-0.538092	0.587	0.602	2.79643554266283e-42	SRSF11
1662	ENSG00000181513	7.72559815527432e-47	1.17797	0.045	0.015	2.81196321655675e-42	ACBD4
1663	ENSG00000249898	9.40556585267505e-47	0.553248	0.129	0.068	3.42343785905666e-42	MCPH1-AS1
1664	ENSG00000104331	9.51964463435881e-47	0.343814	0.211	0.128	3.46496025401392e-42	BPNT2
1665	ENSG00000124782	9.89158767337543e-47	-0.60237	0.603	0.619	3.60034008135519e-42	RREB1
1666	ENSG00000127314	9.90907204372889e-47	0.187515	0.371	0.252	3.60670404247644e-42	RAP1B
1667	ENSG00000153707	1.02495570897616e-46	0.314521	0.548	0.433	3.73063378953144e-42	PTPRD
1668	ENSG00000138430	1.04981445555292e-46	0.134069	0.659	0.49	3.82111465532153e-42	OLA1
1669	ENSG00000184005	1.17244705719689e-46	-2.55641	0.023	0.08	4.26747279878524e-42	ST6GALNAC3
1670	ENSG00000094975	1.17513080904097e-46	0.167278	0.462	0.322	4.27724111874733e-42	SUCO
1671	ENSG00000168843	1.19332184625098e-46	0.113526	0.999	0.983	4.34345285598432e-42	FSTL5
1672	ENSG00000140022	1.29080612519091e-46	0.199461	0.478	0.342	4.69827613446987e-42	STON2
1673	ENSG00000176261	1.31303555685174e-46	0.298935	0.278	0.18	4.77918681982898e-42	ZBTB8OS
1674	ENSG00000271614	1.52656648939593e-46	0.863993	0.07	0.029	5.55639670810331e-42	ATP2B1-AS1
1675	ENSG00000266524	1.74648832810304e-46	1.39862	0.038	0.012	6.35686821662944e-42	GDF10
1676	ENSG00000121104	1.98725173093872e-46	0.863999	0.07	0.029	7.23319885027076e-42	FAM117A
1677	ENSG00000211448	2.31263743749844e-46	0.558943	0.106	0.053	8.41753774500683e-42	DIO2
1678	ENSG00000175183	2.53407400187222e-46	-2.35386	0.026	0.083	9.2235225520145e-42	CSRP2
1679	ENSG00000183638	2.65550490099571e-46	1.00172	0.057	0.022	9.66550673864418e-42	RP1L1
1680	ENSG00000137941	2.79940118696783e-46	-0.553335	0.603	0.614	1.01892604403255e-41	TTLL7
1681	ENSG00000112419	3.21892450139626e-46	0.479669	0.114	0.059	1.17162414001821e-41	PHACTR2
1682	ENSG00000072364	3.25385014399543e-46	0.209542	0.697	0.546	1.18433637541146e-41	AFF4
1683	ENSG00000106070	4.31261090435727e-46	0.206243	0.358	0.242	1.56970411696796e-41	GRB10
1684	ENSG00000137494	4.71984580002533e-46	0.501909	0.139	0.076	1.71792947429322e-41	ANKRD42
1685	ENSG00000130559	4.75911764752813e-46	0.230511	0.585	0.435	1.73222364134729e-41	CAMSAP1
1686	ENSG00000106571	4.79874902763087e-46	-3.73968	0.006	0.053	1.74664867107708e-41	GLI3
1687	ENSG00000227244	5.23666704290034e-46	1.15001	0.045	0.015	1.90604207027486e-41	LINC00845
1688	ENSG00000135317	6.23682774979534e-46	0.221122	0.427	0.302	2.27008056437051e-41	SNX14
1689	ENSG00000154099	7.08693987820958e-46	1.36535	0.037	0.011	2.57950437687072e-41	DNAAF1
1690	ENSG00000136942	7.22441709082325e-46	-0.923238	0.325	0.387	2.62954333271785e-41	RPL35
1691	ENSG00000215126	7.44856474626449e-46	0.358869	0.178	0.103	2.71112859634535e-41	ZNG1F
1692	ENSG00000189045	7.52766433839411e-46	1.50393	0.039	0.012	2.73991926588869e-41	ANKDD1B
1693	ENSG00000146278	7.97907175644307e-46	-1.25763	0.129	0.207	2.90422253791015e-41	PNRC1
1694	ENSG00000281708	7.99789857119335e-46	1.83309	0.026	0.006	2.91107512194296e-41	ERC2-IT1
1695	ENSG00000137275	8.04156747429632e-46	0.571636	0.109	0.055	2.92696972929437e-41	RIPK1
1696	ENSG00000134146	8.34872679026791e-46	0.121912	0.527	0.383	3.03876957712171e-41	DPH6
1697	ENSG00000144224	8.52726514059079e-46	-0.287702	0.887	0.866	3.10375396587224e-41	UBXN4
1698	ENSG00000259248	9.49708100273353e-46	0.275585	0.327	0.22	3.45674754337495e-41	USP3-AS1
1699	ENSG00000169020	1.0308480481327e-45	0.262493	0.27	0.173	3.75208072559339e-41	ATP5ME
1700	ENSG00000215612	1.15793955372483e-45	-2.59594	0.016	0.068	4.21466838764763e-41	HMX1
1701	ENSG00000115866	1.27796129581555e-45	0.273761	0.421	0.299	4.65152352450942e-41	DARS1
1702	ENSG00000189283	1.3495136754697e-45	0.156122	0.311	0.208	4.91195987597461e-41	FHIT
1703	ENSG00000148400	1.39762505153029e-45	-2.55797	0.016	0.068	5.08707566255994e-41	NOTCH1
1704	ENSG00000053438	1.42068983235603e-45	-1.33276	0.135	0.213	5.17102685180948e-41	NNAT
1705	ENSG00000173992	1.6215728816565e-45	0.429166	0.149	0.083	5.90220097465333e-41	CCS
1706	ENSG00000106299	1.7953662972844e-45	0.219884	0.381	0.262	6.53477424885577e-41	WASL
1707	ENSG00000116704	1.85814064654422e-45	0.323259	0.212	0.13	6.76326032529165e-41	SLC35D1
1708	ENSG00000132330	1.89533171618167e-45	0.415193	0.162	0.092	6.89862838055805e-41	SCLY
1709	ENSG00000249042	2.13168434264537e-45	0.203754	0.32	0.212	7.75890467036063e-41	FAM151B-DT
1710	ENSG00000068400	2.54210293859177e-45	0.333942	0.234	0.146	9.25274627588631e-41	GRIPAP1
1711	ENSG00000241343	2.83987384981651e-45	-0.992848	0.29	0.356	1.03365728385621e-40	RPL36A
1712	ENSG00000249592	2.88314976724702e-45	0.28573	0.308	0.204	1.04940885228257e-40	PCGF3-AS1
1713	ENSG00000255171	2.96522269455085e-45	1.89439	0.022	0.004	1.07928175636262e-40	LINC01499
1714	ENSG00000258526	3.03852522040956e-45	0.299852	0.164	0.094	1.10596240972467e-40
1715	ENSG00000061676	3.12517361343894e-45	0.154901	0.574	0.418	1.1375006918195e-40	NCKAP1
1716	ENSG00000178764	3.51419709939586e-45	-1.54713	0.064	0.134	1.27909746023811e-40	ZHX2
1717	ENSG00000177369	3.94592242190086e-45	0.474332	0.151	0.085	1.43623684312348e-40	FLJ40194
1718	ENSG00000102606	3.97793993925523e-45	0.204703	0.517	0.374	1.44789057909012e-40	ARHGEF7
1719	ENSG00000205084	4.15022983281356e-45	0.43792	0.175	0.103	1.51060065454748e-40	TMEM231
1720	ENSG00000169989	4.7880762955225e-45	0.707477	0.085	0.039	1.74276401004428e-40	TIGD4
1721	ENSG00000102290	4.97317286612551e-45	-2.98548	0.016	0.067	1.81013545981236e-40	PCDH11X
1722	ENSG00000224848	5.14408537850887e-45	0.493702	0.158	0.09	1.87234419606966e-40
1723	ENSG00000257261	5.36519217070063e-45	0.48646	0.159	0.091	1.95282264629161e-40	SLC38A4-AS1
1724	ENSG00000276234	5.79739725524456e-45	0.295082	0.253	0.162	2.11013665296392e-40	TADA2A
1725	ENSG00000010626	6.82060761362864e-45	0.395445	0.181	0.107	2.48256475920855e-40	LRRC23
1726	ENSG00000179104	6.88873479575156e-45	-0.352939	0.883	0.86	2.50736169095765e-40	TMTC2
1727	ENSG00000143951	7.31747986387791e-45	0.138609	0.681	0.523	2.66341632085428e-40	WDPCP
1728	ENSG00000140044	7.37266323571747e-45	1.12232	0.046	0.016	2.68350196453645e-40	JDP2
1729	ENSG00000169902	7.69838355376368e-45	0.182607	0.288	0.189	2.80205764589891e-40	TPST1
1730	ENSG00000265808	9.87006178705285e-45	0.232278	0.354	0.239	3.59250508925149e-40	SEC22B
1731	ENSG00000156011	1.01250612633141e-44	0.179229	0.57	0.422	3.68531979862107e-40	PSD3
1732	ENSG00000074317	1.06256700150087e-44	1.12301	0.044	0.015	3.86753137206287e-40	SNCB
1733	ENSG00000188825	1.15952747652906e-44	0.341853	0.163	0.093	4.22044810907047e-40	LINC00910
1734	ENSG00000198786	1.18747250153972e-44	-1.20433	0.161	0.24	4.32216241110428e-40	MT-ND5
1735	ENSG00000261360	1.22985169714219e-44	2.02653	0.021	0.004	4.47641420725816e-40	OTULIN-DT
1736	ENSG00000049618	1.35910706487205e-44	0.15126	0.943	0.843	4.9468778947213e-40	ARID1B
1737	ENSG00000138472	1.36441856530466e-44	1.59879	0.031	0.008	4.96621069399591e-40	GUCA1C
1738	ENSG00000170959	1.60437635909051e-44	0.200552	0.555	0.406	5.83960907181764e-40	DCDC1
1739	ENSG00000061938	1.78180590080598e-44	0.613636	0.101	0.05	6.4854171177536e-40	TNK2
1740	ENSG00000136237	2.0436802786592e-44	0.352842	0.187	0.112	7.43858747826374e-40	RAPGEF5
1741	ENSG00000028116	2.32429224299587e-44	0.395976	0.115	0.059	8.45995890605637e-40	VRK2
1742	ENSG00000198208	2.38198434521926e-44	0.466918	0.154	0.088	8.66994661972907e-40	RPS6KL1
1743	ENSG00000274265	2.67643577884791e-44	0.190068	0.423	0.295	9.74169094785063e-40
1744	ENSG00000121068	2.67960670048935e-44	-2.37241	0.021	0.075	9.75323246844112e-40	TBX2
1745	ENSG00000005249	2.68562251045291e-44	0.186817	0.368	0.252	9.77512881354649e-40	PRKAR2B
1746	ENSG00000250007	2.81416406688345e-44	1.12318	0.059	0.023	1.02429943706424e-39	GJD2-DT
1747	ENSG00000110367	2.92273428515036e-44	0.211721	0.383	0.265	1.06381682510903e-39	DDX6
1748	ENSG00000101353	2.99968253572427e-44	0.715223	0.089	0.042	1.09182444935292e-39	MROH8
1749	ENSG00000148090	3.06746075266459e-44	-0.511537	0.638	0.638	1.11649436475486e-39	AUH
1750	ENSG00000156515	3.24634992639615e-44	0.342994	0.242	0.155	1.18160644620967e-39	HK1
1751	ENSG00000177189	3.34421889906459e-44	0.179889	0.287	0.189	1.21722879488153e-39	RPS6KA3
1752	ENSG00000254980	3.4752331228634e-44	3.40091	0.012	0.001	1.26491535205982e-39
1753	ENSG00000182095	4.03551252830297e-44	-1.10222	0.129	0.208	1.46884585005172e-39	TNRC18
1754	ENSG00000073670	4.22825026159375e-44	-1.678	0.05	0.115	1.53899853021489e-39	ADAM11
1755	ENSG00000058668	4.24699995549383e-44	-1.77439	0.045	0.108	1.54582304380065e-39	ATP2B4
1756	ENSG00000123416	4.40420036869426e-44	-0.696373	0.425	0.473	1.60304085019734e-39	TUBA1B
1757	ENSG00000140577	4.5490459705455e-44	0.189024	0.383	0.263	1.65576175235915e-39	CRTC3
1758	ENSG00000135314	5.23579383616348e-44	0.356664	0.199	0.121	1.90572424048678e-39	KHDC1
1759	ENSG00000064652	5.5761922879246e-44	0.254388	0.259	0.167	2.0296224689588e-39	SNX24
1760	ENSG00000155966	5.86536199741601e-44	0.153661	0.907	0.784	2.13487445981948e-39	AFF2
1761	ENSG00000155754	5.98879239730295e-44	0.487692	0.139	0.077	2.17980065677033e-39	C2CD6
1762	ENSG00000165695	6.67461975720562e-44	0.593981	0.101	0.05	2.4294280992277e-39	AK8
1763	ENSG00000066382	8.81777367177664e-44	-0.276625	0.986	0.958	3.20949326105326e-39	MPPED2
1764	ENSG00000171533	8.84135663288263e-44	-2.02959	0.033	0.091	3.21807698723662e-39	MAP6
1765	ENSG00000196581	9.45331805635648e-44	-2.50257	0.015	0.065	3.44081870615263e-39	AJAP1
1766	ENSG00000054965	9.65364562995513e-44	0.14095	0.645	0.489	3.51373393639107e-39	FAM168A
1767	ENSG00000246225	1.04406062566601e-43	2.04085	0.022	0.004	3.80017186529914e-39
1768	ENSG00000165650	1.11598442685473e-43	0.2656	0.268	0.176	4.06196011686585e-39	PDZD8
1769	ENSG00000119632	1.13152577474238e-43	0.385083	0.166	0.096	4.11852751490732e-39	IFI27L2
1770	ENSG00000164032	1.26492935674502e-43	-0.773386	0.335	0.397	4.60408987268052e-39	H2AZ1
1771	ENSG00000233006	1.41939247374618e-43	0.286485	0.236	0.148	5.16630472594134e-39	MIR3936HG
1772	ENSG00000138111	1.53263709718222e-43	1.02721	0.056	0.022	5.57849250632384e-39	MFSD13A
1773	ENSG00000174498	1.69338160735558e-43	0.79483	0.081	0.037	6.16357037445283e-39	IGDCC3
1774	ENSG00000156113	1.70894128773581e-43	-1.46891	0.107	0.181	6.22020449910081e-39	KCNMA1
1775	ENSG00000228923	1.84280543559514e-43	2.24729	0.018	0.003	6.70744322447921e-39
1776	ENSG00000100906	1.84326749710151e-43	-1.49957	0.079	0.149	6.70912503595008e-39	NFKBIA
1777	ENSG00000188641	1.91022241733939e-43	-2.14414	0.033	0.092	6.95282755463191e-39	DPYD
1778	ENSG00000139438	1.93999617263782e-43	0.300395	0.259	0.168	7.06119806916715e-39	FAM222A
1779	ENSG00000163374	1.96587512645529e-43	0.221531	0.303	0.201	7.15539228527195e-39	YY1AP1
1780	ENSG00000196372	1.98322623138759e-43	0.592751	0.098	0.048	7.21854683700455e-39	ASB13
1781	ENSG00000007001	2.44773476266752e-43	0.614618	0.093	0.045	8.90926498915725e-39	UPP2
1782	ENSG00000060237	2.47349584113838e-43	0.184798	0.669	0.508	9.00303016257547e-39	WNK1
1783	ENSG00000096968	2.4987388864359e-43	0.210495	0.275	0.179	9.09490979884938e-39	JAK2
1784	ENSG00000104412	2.6293444343233e-43	0.252856	0.375	0.262	9.57028787204996e-39	EMC2
1785	ENSG00000103942	2.88529733726617e-43	0.507414	0.148	0.084	1.05019052481814e-38	HOMER2
1786	ENSG00000224167	3.20738556920723e-43	0.296289	0.245	0.157	1.16742419948005e-38	LINC01357
1787	ENSG00000047410	3.30642655524462e-43	-0.795878	0.343	0.403	1.20347313757794e-38	TPR
1788	ENSG00000114757	3.40651277073494e-43	-1.4075	0.193	0.266	1.2399025182921e-38	PEX5L
1789	ENSG00000144152	3.50244309982304e-43	0.419687	0.132	0.072	1.27481923947359e-38	FBLN7
1790	ENSG00000125944	3.66492424235017e-43	-0.587332	0.489	0.518	1.33395912573061e-38	HNRNPR
1791	ENSG00000138400	3.74049731794175e-43	1.94365	0.023	0.005	1.36146621378444e-38	MDH1B
1792	ENSG00000106608	3.91949162510923e-43	0.269123	0.285	0.189	1.42661656170726e-38	URGCP
1793	ENSG00000243193	4.08315137980461e-43	0.404922	0.158	0.091	1.48618543922128e-38	PRKAR2B-AS1
1794	ENSG00000198860	4.56727038168262e-43	0.466756	0.132	0.072	1.66239507352484e-38	TSEN15
1795	ENSG00000162929	4.62097120322984e-43	0.253101	0.303	0.204	1.6819410985516e-38	SANBR
1796	ENSG00000007866	4.87049314422759e-43	0.645695	0.101	0.051	1.77276209463596e-38	TEAD3
1797	ENSG00000230317	5.73034587374591e-43	1.76295	0.023	0.005	2.08573129112604e-38	LINC01284
1798	ENSG00000247151	5.78917383621169e-43	0.704489	0.076	0.034	2.10714349290433e-38	CSTF3-DT
1799	ENSG00000154654	5.85177488211853e-43	-1.5937	0.114	0.189	2.1299290215935e-38	NCAM2
1800	ENSG00000141748	6.53494189111252e-43	0.412659	0.178	0.106	2.37858814952714e-38	ARL5C
1801	ENSG00000107554	6.5821854670537e-43	0.472445	0.121	0.065	2.39578386629821e-38	DNMBP
1802	ENSG00000243176	7.45052864655098e-43	1.16541	0.046	0.016	2.71184341677162e-38
1803	ENSG00000093217	7.51780074115691e-43	0.745552	0.077	0.035	2.73632911376629e-38	XYLB
1804	ENSG00000047662	1.01458025586636e-42	-1.6187	0.073	0.141	3.69286921530239e-38	FAM184B
1805	ENSG00000227598	1.07814578923489e-42	0.86517	0.057	0.023	3.92423504365715e-38
1806	ENSG00000106012	1.1399349657773e-42	0.346826	0.191	0.116	4.1491352884362e-38	IQCE
1807	ENSG00000073969	1.14162894174264e-42	0.223586	0.339	0.231	4.15530102215487e-38	NSF
1808	ENSG00000091409	1.17406848609908e-42	0.65683	0.092	0.045	4.27337447570342e-38	ITGA6
1809	ENSG00000235914	1.1934276024412e-42	0.364822	0.191	0.116	4.34383778736546e-38	MACROD2-AS1
1810	ENSG00000184304	1.33389107503407e-42	-1.57479	0.087	0.158	4.85509673490899e-38	PRKD1
1811	ENSG00000029639	1.37097443523207e-42	0.20635	0.309	0.207	4.9900727493577e-38	TFB1M
1812	ENSG00000158528	1.46369082082865e-42	0.140269	0.933	0.819	5.32754184965211e-38	PPP1R9A
1813	ENSG00000148950	1.49424970113623e-42	0.120897	0.451	0.321	5.43877006219564e-38	IMMP1L
1814	ENSG00000224616	1.5082854304794e-42	0.417479	0.158	0.091	5.4898573098589e-38	RTCA-AS1
1815	ENSG00000213578	1.64805972360629e-42	0.435506	0.137	0.076	5.99860778198216e-38	CPLX3
1816	ENSG00000178104	1.6606687073598e-42	0.162232	0.565	0.411	6.04450196104819e-38	PDE4DIP
1817	ENSG00000178104	1.6606687073598e-42	0.162232	0.565	0.411	6.04450196104819e-38	PDE4DIP
1818	ENSG00000227248	2.05962610966898e-42	1.53417	0.034	0.01	7.49662711397315e-38	NALF1-IT1
1819	ENSG00000104290	2.08903474616547e-42	0.210498	0.575	0.431	7.60366866909309e-38	FZD3
1820	ENSG00000164675	2.188423991444e-42	0.910548	0.053	0.02	7.96542564405786e-38	IQUB
1821	ENSG00000021645	2.33318731670014e-42	-2.49191	0.147	0.22	8.49233519532515e-38	NRXN3
1822	ENSG00000235437	2.43690064764532e-42	0.138638	0.517	0.376	8.86983097729945e-38	LINC01278
1823	ENSG00000084463	2.45030214872024e-42	0.283202	0.322	0.22	8.91860976091194e-38	WBP11
1824	ENSG00000164627	2.5425838525886e-42	0.639459	0.088	0.042	9.254496706652e-38	KIF6
1825	ENSG00000203876	2.66741149010457e-42	1.16291	0.036	0.011	9.70884434168261e-38	ADD3-AS1
1826	ENSG00000084636	2.78860583051794e-42	-1.40392	0.074	0.143	1.01499675019192e-37	COL16A1
1827	ENSG00000048828	2.93456186641511e-42	0.183109	0.437	0.311	1.06812182813777e-37	FAM120A
1828	ENSG00000259577	3.06080184911789e-42	0.669389	0.073	0.033	1.11407065704193e-37	CERNA1
1829	ENSG00000109265	3.17017963599609e-42	0.153842	0.949	0.864	1.15388198390986e-37	CRACD
1830	ENSG00000271717	3.26631807342995e-42	0.473893	0.151	0.086	1.18887445236703e-37
1831	ENSG00000101349	3.75367284986829e-42	0.293865	0.188	0.114	1.36626184389506e-37	PAK5
1832	ENSG00000117632	3.87085371879396e-42	-0.698659	0.432	0.471	1.40891333656663e-37	STMN1
1833	ENSG00000177181	3.91807715207316e-42	0.468641	0.127	0.069	1.42610172181159e-37	RIMKLA
1834	ENSG00000173715	3.98290727702749e-42	0.252202	0.252	0.163	1.44969859069247e-37	C11orf80
1835	ENSG00000092820	4.69083000200443e-42	-1.72616	0.049	0.111	1.70736830412957e-37	EZR
1836	ENSG00000181666	6.28847643439776e-42	0.19273	0.61	0.458	2.2888796525921e-37	ZNF875
1837	ENSG00000154479	6.59669407826816e-42	0.641511	0.106	0.055	2.40106471060804e-37	CFAP210
1838	ENSG00000259336	6.95261803499274e-42	0.288826	0.19	0.116	2.53061391237666e-37
1839	ENSG00000267780	7.07228941300248e-42	1.98709	0.02	0.004	2.57417190054464e-37
1840	ENSG00000144040	7.41869165565694e-42	0.551945	0.103	0.053	2.70025538882601e-37	SFXN5
1841	ENSG00000136448	7.52498856454771e-42	0.247277	0.279	0.185	2.73894533772408e-37	NMT1
1842	ENSG00000185033	1.03002097062448e-41	0.20123	0.391	0.272	3.74907032887898e-37	SEMA4B
1843	ENSG00000162337	1.05893105881626e-41	-1.25275	0.111	0.185	3.85429726787941e-37	LRP5
1844	ENSG00000059769	1.27012127776377e-41	0.48093	0.104	0.053	4.62298742680458e-37	DNAJC25
1845	ENSG00000259439	1.50849141216767e-41	-1.25253	0.105	0.178	5.49060704200789e-37	LINC01833
1846	ENSG00000055044	1.65961664421856e-41	0.201606	0.346	0.237	6.04067266162672e-37	NOP58
1847	ENSG00000163468	1.84881327230472e-41	0.177463	0.374	0.258	6.72931054853471e-37	CCT3
1848	ENSG00000157429	1.89501335583442e-41	0.588107	0.109	0.057	6.89746961256614e-37	ZNF19
1849	ENSG00000157429	1.89501335583442e-41	0.588107	0.109	0.057	6.89746961256614e-37	ZNF19
1850	ENSG00000075043	2.18326151306925e-41	-2.67324	0.014	0.061	7.94663525526944e-37	KCNQ2
1851	ENSG00000100380	2.28726988037259e-41	-0.804541	0.297	0.362	8.32520491058014e-37	ST13
1852	ENSG00000039560	2.80166966122153e-41	0.276527	0.211	0.133	1.01975172329141e-36	RAI14
1853	ENSG00000100280	2.9894276960883e-41	0.350866	0.18	0.108	1.08809189282222e-36	AP1B1
1854	ENSG00000112232	3.55506885951522e-41	-2.25291	0.028	0.082	1.29397396348635e-36	KHDRBS2
1855	ENSG00000255311	3.83491752751004e-41	1.21118	0.035	0.011	1.39583328166311e-36	DLG2-AS2
1856	ENSG00000089199	3.97114482467572e-41	-1.18121	0.121	0.195	1.44541729328547e-36	CHGB
1857	ENSG00000150773	4.09197197840413e-41	0.691758	0.085	0.041	1.48939596069953e-36	PIH1D2
1858	ENSG00000261757	4.11842850268115e-41	3.82561	0.01	0.001	1.49902560640588e-36
1859	ENSG00000122376	4.71408569092869e-41	0.215233	0.404	0.288	1.71583290978423e-36	SHLD2
1860	ENSG00000253675	4.82320624429804e-41	1.00765	0.04	0.013	1.7555506087996e-36
1861	ENSG00000139767	5.42036218002222e-41	-0.230005	0.972	0.946	1.97290342628449e-36	SRRM4
1862	ENSG00000189099	5.77820208401879e-41	0.672084	0.09	0.044	2.10314999454116e-36	PRSS48
1863	ENSG00000082212	6.23644771101911e-41	0.30202	0.22	0.139	2.26994223785674e-36	ME2
1864	ENSG00000225450	7.41739435361294e-41	0.412976	0.142	0.08	2.69978319682804e-36
1865	ENSG00000197969	8.09514775700362e-41	0.110333	0.437	0.309	2.94647188059418e-36	VPS13A
1866	ENSG00000250543	1.11658008791872e-40	1.04866	0.044	0.016	4.06412820400656e-36
1867	ENSG00000248787	1.26600081563214e-40	1.08012	0.052	0.02	4.60798976873785e-36
1868	ENSG00000099260	1.31546590111066e-40	-1.32545	0.081	0.15	4.78803278686257e-36	PALMD
1869	ENSG00000146263	1.3287361156734e-40	0.35097	0.128	0.07	4.83633371382803e-36	MMS22L
1870	ENSG00000102900	1.36738150711517e-40	0.356574	0.18	0.109	4.97699520959781e-36	NUP93
1871	ENSG00000229267	1.46206757524811e-40	0.289194	0.174	0.105	5.32163356038808e-36	SNHG31
1872	ENSG00000205572	1.60331025468717e-40	1.27521	0.04	0.014	5.83572866501036e-36	SERF1B
1873	ENSG00000205572	1.60331025468717e-40	1.27521	0.04	0.014	5.83572866501036e-36	SERF1B
1874	ENSG00000116604	1.84572460574068e-40	0.392349	0.2	0.125	6.71806841997493e-36	MEF2D
1875	ENSG00000250910	1.93857788478453e-40	0.805669	0.068	0.03	7.05603578503873e-36	MAP9-AS1
1876	ENSG00000198160	1.94550828496386e-40	0.182291	0.374	0.261	7.08126105561147e-36	MIER1
1877	ENSG00000185989	2.030873813054e-40	0.61257	0.085	0.041	7.39197450475394e-36	RASA3
1878	ENSG00000075429	2.04513293469678e-40	0.155594	0.606	0.454	7.44387485570933e-36	CACNG5
1879	ENSG00000135525	2.20263883507605e-40	0.162226	0.876	0.745	8.01716483190981e-36	MAP7
1880	ENSG00000270049	2.36270430497211e-40	0.573076	0.105	0.055	8.59977112923747e-36	ATP6V0D1-DT
1881	ENSG00000116191	2.36838297167406e-40	0.13595	0.979	0.93	8.62044034029926e-36	RALGPS2
1882	ENSG00000248932	2.46342726347367e-40	0.140111	0.532	0.391	8.96638255359147e-36	COPB2-DT
1883	ENSG00000147481	2.61151246682014e-40	-1.28713	0.176	0.251	9.50538307673195e-36	SNTG1
1884	ENSG00000275139	2.66533734177822e-40	0.778853	0.072	0.032	9.70129485660438e-36
1885	ENSG00000142156	2.79409582623948e-40	-1.85203	0.033	0.088	1.01699499883465e-35	COL6A1
1886	ENSG00000117479	3.00470110740278e-40	0.301954	0.182	0.11	1.09365110907246e-35	SLC19A2
1887	ENSG00000095015	3.13605950169114e-40	0.169893	0.426	0.303	1.14146293742554e-35	MAP3K1
1888	ENSG00000085365	3.37684449228617e-40	0.155187	0.48	0.346	1.22910385830232e-35	SCAMP1
1889	ENSG00000160953	3.37910673493092e-40	-0.835652	0.28	0.347	1.22992726938016e-35	PWWP3A
1890	ENSG00000184716	3.62518285464338e-40	0.797133	0.069	0.031	1.3194940554331e-35	SERINC4
1891	ENSG00000213904	3.79897239335606e-40	0.439055	0.175	0.106	1.38274997173374e-35	LIPE-AS1
1892	ENSG00000213904	3.79897239335606e-40	0.439055	0.175	0.106	1.38274997173374e-35	LIPE-AS1
1893	ENSG00000140527	4.4089035969925e-40	0.812535	0.075	0.034	1.60475273123333e-35	WDR93
1894	ENSG00000148219	4.93541252687189e-40	0.354944	0.148	0.085	1.79639145153083e-35	ASTN2
1895	ENSG00000052795	5.04670465802299e-40	0.251031	0.245	0.159	1.83689956142721e-35	FNIP2
1896	ENSG00000135838	7.17083090188172e-40	1.39597	0.038	0.013	2.61003903166691e-35	NPL
1897	ENSG00000198363	7.29355989517817e-40	0.173555	0.381	0.269	2.65470993064695e-35	ASPH
1898	ENSG00000147996	8.10943726928638e-40	0.255253	0.317	0.216	2.95167297727486e-35	ZNG1E
1899	ENSG00000018510	8.23955207822023e-40	0.126799	0.377	0.262	2.9990321654306e-35	AGPS
1900	ENSG00000183762	8.36699411196598e-40	-1.83284	0.031	0.086	3.04541851687338e-35	KREMEN1
1901	ENSG00000144535	8.53832818649668e-40	0.153778	0.584	0.437	3.10778069332106e-35	DIS3L2
1902	ENSG00000136156	9.42811189294221e-40	-1.13313	0.146	0.219	3.43164416679311e-35	ITM2B
1903	ENSG00000255388	9.55851011801631e-40	1.43602	0.028	0.008	3.47910651275558e-35	LINC02741
1904	ENSG00000084234	1.20136677243161e-39	0.301123	0.306	0.21	4.37273477829656e-35	APLP2
1905	ENSG00000165119	1.22517474443739e-39	-0.671983	0.395	0.442	4.45939103480321e-35	HNRNPK
1906	ENSG00000149483	1.32961659025146e-39	0.269685	0.22	0.14	4.83953846519726e-35	TMEM138
1907	ENSG00000144061	1.52950904447511e-39	0.258621	0.182	0.111	5.56710702008049e-35	NPHP1
1908	ENSG00000130940	1.6409285795341e-39	0.181968	0.781	0.641	5.97265184378822e-35	CASZ1
1909	ENSG00000111846	1.78107311432745e-39	-1.86648	0.031	0.085	6.48274992152905e-35	GCNT2
1910	ENSG00000105738	2.07361226584689e-39	0.181357	0.765	0.623	7.54753392522951e-35	SIPA1L3
1911	ENSG00000198707	2.24217692172864e-39	0.119948	0.486	0.351	8.1610755597079e-35	CEP290
1912	ENSG00000125124	2.29126519084108e-39	0.312668	0.23	0.148	8.33974704162336e-35	BBS2
1913	ENSG00000141627	2.3366694472038e-39	0.134588	0.643	0.487	8.5050094539324e-35	DYM
1914	ENSG00000187446	2.61860930431508e-39	0.834215	0.073	0.033	9.53121414584603e-35	CHP1
1915	ENSG00000111554	2.80109734585547e-39	0.386652	0.122	0.067	1.01954341194448e-34	MDM1
1916	ENSG00000136371	2.86896442701269e-39	0.288722	0.214	0.136	1.04424567214408e-34	MTHFS
1917	ENSG00000250493	2.93372097075912e-39	1.77548	0.021	0.004	1.0678157589369e-34
1918	ENSG00000085978	2.93441334048498e-39	0.378407	0.169	0.102	1.06806776766972e-34	ATG16L1
1919	ENSG00000149633	3.25306376950541e-39	-6.55228	0	0.035	1.18405015082458e-34	KIAA1755
1920	ENSG00000095564	3.51285025646585e-39	0.161303	0.584	0.437	1.27860723634844e-34	BTAF1
1921	ENSG00000186166	3.9307480623239e-39	0.290815	0.181	0.11	1.43071367972465e-34	CENATAC
1922	ENSG00000225472	4.00111291661352e-39	-1.91779	0.036	0.091	1.45632507938899e-34	NFIB-AS1
1923	ENSG00000167658	4.13944058330165e-39	-1.14519	0.186	0.254	1.50667358351014e-34	EEF2
1924	ENSG00000244754	4.21670483847194e-39	-0.366815	0.793	0.761	1.53479622710701e-34	N4BP2L2
1925	ENSG00000215375	4.22144158225737e-39	1.51408	0.032	0.009	1.53652030711004e-34	MYL5
1926	ENSG00000102755	4.27858986695906e-39	-2.21263	0.022	0.072	1.55732113977576e-34	FLT1
1927	ENSG00000196182	4.60889568423694e-39	0.412451	0.145	0.084	1.67754585114856e-34	STK40
1928	ENSG00000276649	5.04796264123547e-39	1.69336	0.022	0.005	1.83735744215689e-34
1929	ENSG00000143322	5.24308086925272e-39	0.127802	0.526	0.39	1.9083765747906e-34	ABL2
1930	ENSG00000147454	5.41736727251247e-39	0.156323	0.306	0.206	1.97181333984909e-34	SLC25A37
1931	ENSG00000219665	5.78444988824584e-39	0.36174	0.168	0.101	2.10542407032372e-34	ZNF433-AS1
1932	ENSG00000134851	5.86443921193301e-39	0.16436	0.275	0.182	2.13453858435938e-34	TMEM165
1933	ENSG00000140600	6.0704745712219e-39	0.566985	0.095	0.049	2.20953133443335e-34	SH3GL3
1934	ENSG00000198130	6.28707765534486e-39	0.15291	0.58	0.438	2.28837052499242e-34	HIBCH
1935	ENSG00000179532	6.42234868331438e-39	0.342974	0.188	0.117	2.33760647375277e-34	DNHD1
1936	ENSG00000089091	6.83518403042675e-39	0.236887	0.216	0.137	2.48787028339473e-34	DZANK1
1937	ENSG00000265491	6.93279287826107e-39	0.152598	0.398	0.283	2.52339795182946e-34	RNF115
1938	ENSG00000120251	7.2011863740085e-39	0.684602	0.072	0.033	2.62108781641161e-34	GRIA2
1939	ENSG00000139537	7.26180056378406e-39	0.616047	0.092	0.046	2.64315016920612e-34	CCDC65
1940	ENSG00000198722	7.86082555882406e-39	0.16098	0.655	0.505	2.86118328690078e-34	UNC13B
1941	ENSG00000162769	7.92897043015047e-39	0.282648	0.225	0.145	2.88598665716617e-34	FLVCR1
1942	ENSG00000122548	9.92988778570381e-39	1.33445	0.029	0.008	3.61428055624047e-34	KIAA0087
1943	ENSG00000238113	1.07769254456475e-38	0.928839	0.062	0.027	3.92258532370679e-34	LINC01410
1944	ENSG00000115295	1.11066867071429e-38	-0.755392	0.419	0.457	4.04261182766587e-34	CLIP4
1945	ENSG00000131323	1.18183791132267e-38	0.138732	0.453	0.328	4.30165362963224e-34	TRAF3
1946	ENSG00000255886	1.21580630450983e-38	1.05109	0.044	0.016	4.42529178715487e-34
1947	ENSG00000087095	1.30858495350916e-38	-0.37283	0.963	0.916	4.76298751378264e-34	NLK
1948	ENSG00000114473	1.38759698129443e-38	0.426336	0.131	0.074	5.05057549251545e-34	IQCG
1949	ENSG00000008405	1.43476009676153e-38	0.180326	0.322	0.223	5.2222398001926e-34	CRY1
1950	ENSG00000198162	1.43645773951489e-38	0.120866	0.489	0.355	5.22841888028628e-34	MAN1A2
1951	ENSG00000179869	1.57582409433301e-38	2.0859	0.025	0.006	5.73568453855327e-34	ABCA13
1952	ENSG00000139266	1.62190649225915e-38	0.535223	0.104	0.055	5.90341525052484e-34	MARCHF9
1953	ENSG00000231721	1.6648539826156e-38	1.00175	0.046	0.017	6.05973552592427e-34	LINC-PINT
1954	ENSG00000097046	1.89415642015293e-38	0.684486	0.07	0.032	6.89435053807263e-34	CDC7
1955	ENSG00000079335	2.2949693554903e-38	0.298997	0.213	0.136	8.35322946011359e-34	CDC14A
1956	ENSG00000139173	2.33886103041727e-38	0.463295	0.123	0.068	8.51298637851279e-34	TMEM117
1957	ENSG00000054690	2.3888319238326e-38	0.30644	0.192	0.119	8.69487043636592e-34	PLEKHH1
1958	ENSG00000198752	2.56657220598348e-38	0.213546	0.321	0.221	9.34180951533867e-34	CDC42BPB
1959	ENSG00000261609	2.63367580746689e-38	0.26701	0.17	0.103	9.586053204018e-34	GAN
1960	ENSG00000227543	2.75369592039417e-38	0.90777	0.052	0.021	1.00229024110507e-33	SPAG5-AS1
1961	ENSG00000141664	2.92018288549243e-38	0.340675	0.155	0.092	1.06288816666153e-33	ZCCHC2
1962	ENSG00000204272	3.01946951541363e-38	0.215005	0.234	0.152	1.09902651422025e-33	NBDY
1963	ENSG00000107242	3.10949234622937e-38	-3.06534	0.011	0.054	1.13179302418057e-33	PIP5K1B
1964	ENSG00000074416	3.21162533435375e-38	-1.22051	0.124	0.194	1.16896738919808e-33	MGLL
1965	ENSG00000229278	3.28452340694387e-38	1.37013	0.035	0.011	1.19550082965943e-33
1966	ENSG00000155085	3.40789501748238e-38	-0.95281	0.266	0.33	1.24040562846324e-33	AK9
1967	ENSG00000165185	4.04185959806057e-38	0.156422	0.817	0.673	1.47115605650209e-33	KIAA1958
1968	ENSG00000003402	4.14672946323754e-38	0.278877	0.228	0.147	1.5093265900292e-33	CFLAR
1969	ENSG00000126106	4.35922943079898e-38	0.464092	0.121	0.067	1.58667232822221e-33	TMEM53
1970	ENSG00000166598	4.46123165929904e-38	-0.923252	0.219	0.29	1.62379909935166e-33	HSP90B1
1971	ENSG00000154447	4.52583599167045e-38	0.341139	0.166	0.1	1.64731378424821e-33	SH3RF1
1972	ENSG00000226869	4.79385194339065e-38	0.610582	0.062	0.026	1.74486623035533e-33	LHFPL3-AS1
1973	ENSG00000197548	4.99314645762285e-38	0.117093	0.502	0.371	1.81740544764556e-33	ATG7
1974	ENSG00000087206	5.75703477661641e-38	0.145989	0.362	0.251	2.09544551799284e-33	UIMC1
1975	ENSG00000167552	5.91446670179959e-38	-0.953495	0.326	0.378	2.15274759012102e-33	TUBA1A
1976	ENSG00000166436	6.21802578553761e-38	0.397011	0.147	0.086	2.26323702541998e-33	TRIM66
1977	ENSG00000260192	6.29671299473565e-38	0.804195	0.066	0.029	2.29187759582388e-33	LINC02240
1978	ENSG00000118242	6.59304319044347e-38	0.12029	0.496	0.361	2.39973586045762e-33	MREG
1979	ENSG00000130779	6.59889908503466e-38	0.21588	0.349	0.246	2.40186728897092e-33	CLIP1
1980	ENSG00000149294	6.67291421052118e-38	-0.244956	0.954	0.914	2.4288073143455e-33	NCAM1
1981	ENSG00000140876	7.22008595964154e-38	1.07498	0.039	0.014	2.62796688759033e-33	NUDT7
1982	ENSG00000157087	7.34671051673829e-38	-1.75907	0.034	0.087	2.6740556938824e-33	ATP2B2
1983	ENSG00000159335	7.4387273216738e-38	-0.64854	0.415	0.458	2.70754797054283e-33	PTMS
1984	ENSG00000239219	8.27359054292914e-38	0.223047	0.14	0.08	3.01142148581535e-33
1985	ENSG00000087263	8.84294172892868e-38	0.404637	0.174	0.107	3.21865393049546e-33	OGFOD1
1986	ENSG00000247708	9.52382797447695e-38	0.248943	0.243	0.161	3.46648290615012e-33	STX18-AS1
1987	ENSG00000116194	1.14383512209475e-37	0.153605	0.487	0.355	4.16333107740047e-33	ANGPTL1
1988	ENSG00000180979	1.40207694557055e-37	0.301022	0.224	0.144	5.1032796664877e-33	LRRC57
1989	ENSG00000233452	1.42659295388819e-37	1.15336	0.043	0.016	5.19251303356222e-33	STXBP5-AS1
1990	ENSG00000102181	1.52057918535809e-37	0.348926	0.185	0.115	5.53460411886637e-33	CD99L2
1991	ENSG00000287430	1.53960606455876e-37	1.56923	0.024	0.006	5.60385815378098e-33
1992	ENSG00000109832	1.59375936427876e-37	0.934738	0.061	0.026	5.80096533410184e-33	DDX25
1993	ENSG00000119866	1.62987256811505e-37	-2.04591	0.025	0.074	5.93241017342515e-33	BCL11A
1994	ENSG00000197818	1.64136319834394e-37	0.289188	0.197	0.124	5.97423376933228e-33	SLC9A8
1995	ENSG00000179271	1.78951760202755e-37	-1.2258	0.12	0.188	6.51348616785986e-33	GADD45GIP1
1996	ENSG00000159733	1.86503984456003e-37	0.91899	0.061	0.027	6.78837202622961e-33	ZFYVE28
1997	ENSG00000165097	1.97278141751793e-37	0.311612	0.21	0.135	7.18052980348177e-33	KDM1B
1998	ENSG00000111186	2.0316017691679e-37	-2.10214	0.032	0.084	7.39462411941731e-33	WNT5B
[truncated: 10,596 more rows]

## Sheet: Supplementary File 1E
Supplementary File 1E: Differentially expressed genes in cones vs cone precursors in a 3’ snRNA-seq dataset (data of Zuo et al., PMID 39117640).
	ensgene	p_val	avg_log2FC	pct.1	pct.2	p_val_adj	symbol
1	ENSG00000271860	0	4.98909	0.925	0.094	0
2	ENSG00000187033	0	4.31469	0.869	0.067	0	SAMD7
3	ENSG00000197635	0	3.616	0.901	0.104	0	DPP4
4	ENSG00000170289	0	3.57299	0.98	0.186	0	CNGB3
5	ENSG00000151150	0	3.84731	0.964	0.171	0	ANK3
6	ENSG00000138472	0	4.26636	0.849	0.066	0	GUCA1C
7	ENSG00000140859	0	3.10583	0.938	0.166	0	KIFC3
8	ENSG00000091428	0	3.3439	0.982	0.211	0	RAPGEF4
9	ENSG00000147724	0	3.39063	0.977	0.207	0	FAM135B
10	ENSG00000154655	0	3.93884	0.856	0.086	0	L3MBTL4
11	ENSG00000140090	0	3.31627	0.926	0.157	0	SLC24A4
12	ENSG00000248528	0	3.93177	0.85	0.084	0	LINC02058
13	ENSG00000112599	0	4.88482	0.817	0.052	0	GUCA1B
14	ENSG00000111110	0	3.23032	0.905	0.144	0	PPM1H
15	ENSG00000095464	0	3.198	0.916	0.158	0	PDE6C
16	ENSG00000150275	0	3.6766	0.978	0.225	0	PCDH15
17	ENSG00000170324	0	2.75824	0.952	0.199	0	FRMPD2
18	ENSG00000145703	0	3.31162	0.987	0.235	0	IQGAP2
19	ENSG00000071909	0	3.15407	0.967	0.218	0	MYO3B
20	ENSG00000183049	0	3.51036	0.988	0.242	0	CAMK1D
21	ENSG00000090975	0	3.08341	0.939	0.195	0	PITPNM2
22	ENSG00000156475	0	2.89173	0.986	0.243	0	PPP2R2B
23	ENSG00000287277	0	5.1436	0.786	0.043	0
24	ENSG00000198879	0	3.2817	0.873	0.133	0	SFMBT2
25	ENSG00000234173	0	3.82036	0.829	0.09	0
26	ENSG00000237499	0	3.47926	0.859	0.121	0	WAKMAR2
27	ENSG00000139053	0	2.75496	0.988	0.25	0	PDE6H
28	ENSG00000149177	0	2.73218	0.919	0.199	0	PTPRJ
29	ENSG00000271850	0	2.74672	0.984	0.266	0	LINC02343
30	ENSG00000170571	0	2.55606	0.963	0.251	0	EMB
31	ENSG00000162885	0	2.68433	0.934	0.224	0	B3GALNT2
32	ENSG00000106536	0	2.95631	0.844	0.136	0	POU6F2
33	ENSG00000102104	0	3.51648	0.799	0.092	0	RS1
34	ENSG00000285842	0	2.45346	0.94	0.233	0
35	ENSG00000271901	0	2.44816	0.951	0.246	0
36	ENSG00000173706	0	2.88376	0.976	0.272	0	HEG1
37	ENSG00000108370	0	4.71878	0.747	0.043	0	RGS9
38	ENSG00000081189	0	2.54537	0.915	0.213	0	MEF2C
39	ENSG00000225179	0	2.58907	0.978	0.277	0	LINC00457
40	ENSG00000053524	0	4.46504	0.755	0.056	0	MCF2L2
41	ENSG00000225718	0	2.58939	0.9	0.204	0
42	ENSG00000132026	0	3.57151	0.787	0.093	0	RTBDN
43	ENSG00000152056	0	3.11584	0.821	0.127	0	AP1S3
44	ENSG00000198929	0	2.57527	0.986	0.295	0	NOS1AP
45	ENSG00000075223	0	3.30557	0.796	0.108	0	SEMA3C
46	ENSG00000250305	0	2.64074	0.951	0.263	0	TRMT9B
47	ENSG00000133640	0	2.39527	0.971	0.283	0	LRRIQ1
48	ENSG00000254787	0	2.93834	0.824	0.138	0
49	ENSG00000113657	0	3.32833	0.987	0.302	0	DPYSL3
50	ENSG00000163491	0	3.36544	0.793	0.111	0	NEK10
51	ENSG00000260042	0	5.4969	0.705	0.028	0
52	ENSG00000270792	0	4.72317	0.73	0.054	0
53	ENSG00000121310	0	2.254	0.967	0.292	0	ECHDC2
54	ENSG00000122477	0	3.6219	0.774	0.099	0	LRRC39
55	ENSG00000246922	0	2.36032	0.909	0.234	0	UBAP1L
56	ENSG00000120910	0	2.79234	0.835	0.16	0	PPP3CC
57	ENSG00000135127	0	2.35231	0.899	0.226	0	BICDL1
58	ENSG00000118997	0	2.38735	0.948	0.276	0	DNAH7
59	ENSG00000153904	0	2.42327	0.89	0.223	0	DDAH1
60	ENSG00000165238	0	2.4139	0.869	0.205	0	WNK2
61	ENSG00000144840	0	2.96113	0.81	0.15	0	RABL3
62	ENSG00000133958	0	2.11035	0.893	0.235	0	UNC79
63	ENSG00000166387	0	2.87673	0.774	0.117	0	PPFIBP2
64	ENSG00000064042	0	2.92536	0.988	0.332	0	LIMCH1
65	ENSG00000166569	0	2.09203	0.94	0.287	0	CPLX4
66	ENSG00000235244	0	2.10102	0.951	0.299	0	DANT2
67	ENSG00000082397	0	2.37546	0.909	0.261	0	EPB41L3
68	ENSG00000250994	0	2.78212	0.798	0.151	0
69	ENSG00000005469	0	2.20219	0.869	0.222	0	CROT
70	ENSG00000185737	0	2.28487	0.981	0.335	0	NRG3
71	ENSG00000184828	0	2.39078	0.829	0.188	0	ZBTB7C
72	ENSG00000114279	0	2.02319	0.842	0.202	0	FGF12
73	ENSG00000187720	0	2.8558	0.757	0.119	0	THSD4
74	ENSG00000113231	0	2.47456	0.81	0.176	0	PDE8B
75	ENSG00000186007	0	1.80543	0.893	0.261	0	LEMD1
76	ENSG00000151718	0	2.03596	0.956	0.327	0	WWC2
77	ENSG00000162946	0	2.95246	0.74	0.112	0	DISC1
78	ENSG00000165164	0	1.98533	0.85	0.223	0	CFAP47
79	ENSG00000148219	0	3.14529	0.985	0.36	0	ASTN2
80	ENSG00000072110	0	3.34152	0.704	0.079	0	ACTN1
81	ENSG00000070729	0	2.5284	0.756	0.133	0	CNGB1
82	ENSG00000163431	0	2.78248	0.76	0.14	0	LMOD1
83	ENSG00000172159	0	2.17737	0.845	0.225	0	FRMD3
84	ENSG00000183036	0	4.46747	0.663	0.045	0	PCP4
85	ENSG00000107864	0	1.99946	0.964	0.347	0	CPEB3
86	ENSG00000259221	0	2.73066	0.884	0.267	0
87	ENSG00000116198	0	2.14128	0.838	0.222	0	CEP104
88	ENSG00000154102	0	2.10623	0.847	0.231	0	C16orf74
89	ENSG00000168234	0	2.01666	0.861	0.245	0	TTC39C
90	ENSG00000261460	0	2.43716	0.868	0.253	0
91	ENSG00000134769	0	1.62089	0.792	0.177	0	DTNA
92	ENSG00000035403	0	2.04961	0.845	0.231	0	VCL
93	ENSG00000167306	0	1.78497	0.939	0.325	0	MYO5B
94	ENSG00000131389	0	2.05621	0.889	0.277	0	SLC6A6
95	ENSG00000123104	0	2.93043	0.724	0.113	0	ITPR2
96	ENSG00000163377	0	2.00751	0.984	0.374	0	TAFA4
97	ENSG00000150054	0	2.05063	0.863	0.254	0	MPP7
98	ENSG00000101977	0	3.90206	0.665	0.056	0	MCF2
99	ENSG00000039560	0	2.19652	0.849	0.241	0	RAI14
100	ENSG00000136531	0	3.66805	0.681	0.074	0	SCN2A
101	ENSG00000114541	0	2.09259	0.961	0.356	0	FRMD4B
102	ENSG00000104324	0	1.94518	0.929	0.324	0	CPQ
103	ENSG00000109103	0	1.81283	0.935	0.331	0	UNC119
104	ENSG00000227110	0	2.12759	0.982	0.379	0	LMCD1-AS1
105	ENSG00000112619	0	2.10546	0.964	0.361	0	PRPH2
106	ENSG00000136002	0	2.4923	0.745	0.145	0	ARHGEF4
107	ENSG00000010818	0	1.63619	0.917	0.318	0	HIVEP2
108	ENSG00000197892	0	2.27721	0.777	0.181	0	KIF13B
109	ENSG00000050405	0	2.25764	0.807	0.213	0	LIMA1
110	ENSG00000145012	0	1.79922	0.845	0.253	0	LPP
111	ENSG00000135299	0	1.91864	0.843	0.252	0	ANKRD6
112	ENSG00000128487	0	1.89283	0.97	0.379	0	SPECC1
113	ENSG00000253438	0	2.33409	0.76	0.172	0	PCAT1
114	ENSG00000133460	0	1.97462	0.812	0.225	0	SLC2A11
115	ENSG00000231312	0	1.81414	0.892	0.305	0	MAP4K3-DT
116	ENSG00000175471	0	2.23365	0.779	0.192	0	MCTP1
117	ENSG00000197959	0	1.84747	0.845	0.259	0	DNM3
118	ENSG00000109819	0	2.82595	0.698	0.117	0	PPARGC1A
119	ENSG00000158555	0	2.03121	0.785	0.205	0	GDPD5
120	ENSG00000153237	0	1.86808	0.838	0.258	0	CCDC148
121	ENSG00000156564	0	1.91105	0.962	0.382	0	LRFN2
122	ENSG00000127328	0	2.08018	0.75	0.171	0	RAB3IP
123	ENSG00000151320	0	2.2165	0.733	0.154	0	AKAP6
124	ENSG00000117643	0	2.57345	0.718	0.14	0	MAN1C1
125	ENSG00000106070	0	1.78239	0.836	0.259	0	GRB10
126	ENSG00000147010	0	1.72379	0.936	0.361	0	SH3KBP1
127	ENSG00000165309	0	4.24095	0.62	0.045	0	ARMC3
128	ENSG00000129317	0	1.83268	0.851	0.276	0	PUS7L
129	ENSG00000156140	0	2.25623	0.75	0.177	0	ADAMTS3
130	ENSG00000168263	0	1.79316	0.955	0.382	0	KCNV2
131	ENSG00000071205	0	2.53865	0.699	0.128	0	ARHGAP10
132	ENSG00000135090	0	2.24035	0.775	0.205	0	TAOK3
133	ENSG00000163162	0	1.93123	0.921	0.352	0	RNF149
134	ENSG00000285534	0	3.39992	0.637	0.068	0
135	ENSG00000198796	0	4.24287	0.627	0.058	0	ALPK2
136	ENSG00000236283	0	2.75496	0.733	0.167	0
137	ENSG00000078725	0	2.24774	0.727	0.162	0	BRINP1
138	ENSG00000078053	0	1.94247	0.949	0.385	0	AMPH
139	ENSG00000137802	0	2.2658	0.726	0.164	0	MAPKBP1
140	ENSG00000103187	0	2.10963	0.77	0.209	0	COTL1
141	ENSG00000132561	0	2.68952	0.693	0.132	0	MATN2
142	ENSG00000173890	0	2.19044	0.693	0.134	0	GPR160
143	ENSG00000119698	0	1.92552	0.957	0.399	0	PPP4R4
144	ENSG00000250390	0	2.48195	0.702	0.145	0
145	ENSG00000154265	0	1.68792	0.922	0.366	0	ABCA5
146	ENSG00000171773	0	4.36269	0.597	0.042	0	NXNL1
147	ENSG00000127472	0	5.3943	0.574	0.02	0	PLA2G5
148	ENSG00000068796	0	2.11216	0.966	0.413	0	KIF2A
149	ENSG00000156194	0	4.86205	0.582	0.031	0	PPEF2
150	ENSG00000112706	0	1.62687	0.992	0.441	0	IMPG1
151	ENSG00000155886	0	1.8072	0.972	0.423	0	SLC24A2
152	ENSG00000128567	0	2.66074	0.659	0.112	0	PODXL
153	ENSG00000169862	0	-4.09717	0.321	0.867	0	CTNND2
154	ENSG00000147509	0	3.05607	0.619	0.073	0	RGS20
155	ENSG00000168502	0	3.15328	0.623	0.079	0	MTCL1
156	ENSG00000134775	0	2.16188	0.984	0.44	0	FHOD3
157	ENSG00000197580	0	3.1014	0.618	0.076	0	BCO2
158	ENSG00000088756	0	1.94943	0.718	0.177	0	ARHGAP28
159	ENSG00000122547	0	2.13837	0.704	0.168	0	EEPD1
160	ENSG00000151062	0	1.86912	0.983	0.449	0	CACNA2D4
161	ENSG00000114124	0	5.57331	0.551	0.018	0	GRK7
162	ENSG00000103184	0	3.14843	0.604	0.081	0	SEC14L5
163	ENSG00000198010	0	2.48502	0.656	0.135	0	DLGAP2
164	ENSG00000079691	0	1.642	0.975	0.454	0	CARMIL1
165	ENSG00000187772	0	2.08062	0.663	0.143	0	LIN28B
166	ENSG00000259044	0	2.25324	0.66	0.14	0
167	ENSG00000186314	0	2.26769	0.98	0.462	0	PRELID2
168	ENSG00000112242	0	2.09555	0.667	0.15	0	E2F3
169	ENSG00000163710	0	2.1988	0.656	0.143	0	PCOLCE2
170	ENSG00000164588	0	2.16847	0.997	0.484	0	HCN1
171	ENSG00000118276	0	2.63594	0.608	0.095	0	B4GALT6
172	ENSG00000163082	0	4.27441	0.545	0.035	0	SGPP2
173	ENSG00000145934	0	2.01676	0.99	0.48	0	TENM2
174	ENSG00000101746	0	-3.95564	0.459	0.968	0	NOL4
175	ENSG00000099282	0	2.9757	0.582	0.075	0	TSPAN15
176	ENSG00000157388	0	2.37204	0.63	0.124	0	CACNA1D
177	ENSG00000092200	0	2.41954	0.992	0.488	0	RPGRIP1
178	ENSG00000268221	0	5.2061	0.52	0.018	0	OPN1MW
179	ENSG00000223653	0	2.13336	0.635	0.134	0	BCL10-AS1
180	ENSG00000082126	0	1.97488	0.995	0.496	0	MPP4
181	ENSG00000177112	0	3.3766	0.552	0.054	0	IRAG1-AS1
182	ENSG00000163075	0	2.44154	0.594	0.102	0	CFAP221
183	ENSG00000259200	0	2.23876	0.629	0.137	0
184	ENSG00000273032	0	2.38567	0.609	0.118	0	DGCR5
185	ENSG00000198336	0	4.73384	0.515	0.025	0	MYL4
186	ENSG00000197085	0	3.86289	0.542	0.053	0	NPSR1-AS1
187	ENSG00000143669	0	1.63479	0.977	0.488	0	LYST
188	ENSG00000072422	0	1.82595	0.985	0.497	0	RHOBTB1
189	ENSG00000251034	0	2.94867	0.553	0.068	0
190	ENSG00000140479	0	3.32752	0.549	0.065	0	PCSK6
191	ENSG00000170390	0	1.80588	0.965	0.482	0	DCLK2
192	ENSG00000167612	0	3.46484	0.539	0.058	0	ANKRD33
193	ENSG00000239887	0	2.93235	0.55	0.072	0	C1orf226
194	ENSG00000197826	0	2.84217	0.559	0.081	0	CFAP299
195	ENSG00000283003	0	2.48272	0.58	0.102	0
196	ENSG00000175727	0	3.02338	0.55	0.073	0	MLXIP
197	ENSG00000070759	0	2.39688	0.578	0.107	0	TESK2
198	ENSG00000254115	0	3.49898	0.522	0.053	0
199	ENSG00000187017	0	4.31275	0.5	0.032	0	ESPN
200	ENSG00000101670	0	4.96417	0.488	0.021	0	LIPG
201	ENSG00000231185	0	3.99475	0.516	0.05	0	SPRY4-AS1
202	ENSG00000173988	0	2.39735	0.567	0.101	0	LRRC63
203	ENSG00000155761	0	2.68129	0.55	0.088	0	SPAG17
204	ENSG00000078018	0	2.65798	0.98	0.518	0	MAP2
205	ENSG00000279240	0	2.3127	0.518	0.061	0
206	ENSG00000119121	0	4.38633	0.489	0.033	0	TRPM6
207	ENSG00000183638	0	2.99655	0.519	0.064	0	RP1L1
208	ENSG00000134709	0	2.4841	0.547	0.094	0	HOOK1
209	ENSG00000226965	0	4.04932	0.499	0.046	0
210	ENSG00000140545	0	2.2013	0.533	0.08	0	MFGE8
211	ENSG00000007062	0	2.07305	0.994	0.541	0	PROM1
212	ENSG00000080166	0	-3.395	0.488	0.941	0	DCT
213	ENSG00000123977	0	5.45731	0.468	0.017	0	DAW1
214	ENSG00000198691	0	1.97862	0.991	0.542	0	ABCA4
215	ENSG00000116016	0	2.63307	0.532	0.084	0	EPAS1
216	ENSG00000120029	0	1.67205	0.98	0.532	0	ARMH3
217	ENSG00000250842	0	2.59576	0.523	0.078	0
218	ENSG00000003147	0	2.33977	0.538	0.095	0	ICA1
219	ENSG00000248319	0	2.95605	0.503	0.064	0	LINC02275
220	ENSG00000185046	0	2.03122	0.995	0.557	0	ANKS1B
221	ENSG00000261241	0	4.00658	0.474	0.037	0	LINC02128
222	ENSG00000154263	0	2.35928	0.526	0.09	0	ABCA10
223	ENSG00000099814	0	3.80214	0.464	0.037	0	CEP170B
224	ENSG00000287063	0	4.34606	0.451	0.025	0
225	ENSG00000120500	0	4.41401	0.459	0.038	0	ARR3
226	ENSG00000230831	0	3.8944	0.461	0.041	0
227	ENSG00000144407	0	4.38015	0.443	0.023	0	PTH2R
228	ENSG00000048342	0	2.50741	0.978	0.558	0	CC2D2A
229	ENSG00000197442	0	3.00366	0.47	0.052	0	MAP3K5
230	ENSG00000204091	0	2.73835	0.478	0.065	0	TDRG1
231	ENSG00000226124	0	2.80917	0.481	0.071	0	FTCDNL1
232	ENSG00000154065	0	4.46328	0.434	0.024	0	ANKRD29
233	ENSG00000179915	0	-3.93771	0.526	0.933	0	NRXN1
234	ENSG00000115977	0	1.57504	0.988	0.582	0	AAK1
235	ENSG00000237844	0	4.42217	0.433	0.04	0
236	ENSG00000184305	0	2.11012	0.996	0.606	0	CCSER1
237	ENSG00000285552	0	4.22578	0.411	0.024	0
238	ENSG00000266846	0	4.03647	0.413	0.028	0
239	ENSG00000150672	0	2.86444	0.996	0.612	0	DLG2
240	ENSG00000049759	0	1.85849	0.995	0.611	0	NEDD4L
241	ENSG00000255555	0	3.20346	0.434	0.051	0
242	ENSG00000101144	0	4.34458	0.406	0.023	0	BMP7
243	ENSG00000163453	0	4.4696	0.405	0.023	0	IGFBP7
244	ENSG00000155846	0	3.4213	0.421	0.043	0	PPARGC1B
245	ENSG00000231898	0	3.16611	0.408	0.042	0	MYO3B-AS1
246	ENSG00000103175	0	4.20335	0.397	0.032	0	WFDC1
247	ENSG00000253288	0	3.41109	0.403	0.039	0
248	ENSG00000165995	0	1.68001	0.994	0.63	0	CACNB2
249	ENSG00000287092	0	3.3838	0.414	0.051	0
250	ENSG00000144451	0	1.70524	0.986	0.626	0	SPAG16
251	ENSG00000286466	0	3.257	0.406	0.047	0
252	ENSG00000042781	0	1.67301	0.997	0.644	0	USH2A
253	ENSG00000231383	0	3.358	0.389	0.042	0	FGF12-AS1
254	ENSG00000285820	0	3.57128	0.376	0.032	0
255	ENSG00000254087	0	3.97643	0.367	0.025	0	LYN
256	ENSG00000111837	0	1.48073	0.995	0.655	0	MAK
257	ENSG00000106785	0	3.18076	0.374	0.038	0	TRIM14
258	ENSG00000177675	0	3.05535	0.367	0.038	0	CD163L1
259	ENSG00000154710	0	1.5793	0.986	0.665	0	RABGEF1
260	ENSG00000113578	0	5.08349	0.331	0.014	0	FGF1
261	ENSG00000175175	0	1.44175	0.992	0.676	0	PPM1E
262	ENSG00000172493	0	1.82853	0.997	0.692	0	AFF1
263	ENSG00000067057	0	3.50448	0.331	0.027	0	PFKP
264	ENSG00000249825	0	3.59381	0.33	0.027	0	THBS4-AS1
265	ENSG00000181804	0	3.9833	0.321	0.021	0	SLC9A9
266	ENSG00000251200	0	4.15977	0.311	0.02	0
267	ENSG00000107438	0	3.76896	0.311	0.022	0	PDLIM1
268	ENSG00000261742	0	4.30077	0.307	0.022	0	LINC00922
269	ENSG00000253819	0	6.61517	0.286	0.006	0	LINC01151
270	ENSG00000253859	0	5.4601	0.279	0.007	0
271	ENSG00000135931	0	1.35985	0.998	0.727	0	ARMC9
272	ENSG00000260072	0	4.36097	0.28	0.015	0
273	ENSG00000261738	0	6.22961	0.266	0.005	0	MIR3976HG
274	ENSG00000198947	0	1.70681	0.998	0.743	0	DMD
275	ENSG00000182674	0	1.68197	0.999	0.761	0	KCNB2
276	ENSG00000004468	0	5.34603	0.243	0.007	0	CD38
277	ENSG00000232359	0	5.15355	0.237	0.009	0
278	ENSG00000147127	0	5.01562	0.23	0.007	0	RAB41
279	ENSG00000254951	0	5.7141	0.228	0.006	0
280	ENSG00000183570	0	1.4406	0.999	0.804	0	PCBP3
281	ENSG00000150625	0	-2.16394	0.823	0.966	0	GPM6A
282	ENSG00000248905	0	1.56177	0.999	0.894	0	FMN1
283	ENSG00000171723	0	0.974434	1	0.917	0	GPHN
284	ENSG00000176406	0	1.21632	0.996	0.917	0	RIMS2
285	ENSG00000198963	0	-2.53019	0.912	0.985	0	RORB
286	ENSG00000127914	0	1.03979	1	0.931	0	AKAP9
287	ENSG00000156508	0	-1.96053	0.936	0.972	0	EEF1A1
288	ENSG00000057657	0	-1.76572	0.976	0.983	0	PRDM1
289	ENSG00000185008	0	-1.37056	0.999	0.996	0	ROBO2
290	ENSG00000276644	0	-1.88489	0.999	0.998	0	DACH1
291	ENSG00000156687	4.88070310398343e-308	1.98577	0.663	0.151	1.77647831578789e-303	UNC5D
292	ENSG00000135541	7.32278093633272e-308	1.0242	0.998	0.902	2.66534580520638e-303	AHI1
293	ENSG00000124788	2.11134982676196e-307	1.5068	0.987	0.559	7.68489109944818e-303	ATXN1
294	ENSG00000162753	2.15917714611434e-307	4.14024	0.281	0.018	7.85897297642696e-303	SLC9C2
295	ENSG00000260071	7.23243669137401e-306	2.05679	0.576	0.111	2.63246230692631e-301
296	ENSG00000184838	9.14022527441248e-306	1.6242	0.971	0.437	3.32685919538065e-301	PRR16
297	ENSG00000285367	1.57103894309704e-305	2.1383	0.583	0.115	5.7182675450846e-301
298	ENSG00000075391	3.00571439229565e-304	1.36821	0.992	0.639	1.09401992450777e-299	RASAL2
299	ENSG00000228793	8.574157645595e-304	4.30175	0.267	0.015	3.12082189984367e-299
300	ENSG00000164742	3.28113933426976e-303	1.75169	0.871	0.296	1.19426909488751e-298	ADCY1
301	ENSG00000112293	6.52967377440528e-302	2.47265	0.524	0.094	2.37667066040803e-297	GPLD1
302	ENSG00000164830	1.38783880772678e-301	1.30811	0.995	0.725	5.05145569236394e-297	OXR1
303	ENSG00000148154	3.73214068897735e-300	1.89086	0.849	0.289	1.35842456797397e-295	UGCG
304	ENSG00000157152	9.59106150595029e-300	1.61489	0.927	0.355	3.49095456693579e-295	SYN2
305	ENSG00000163629	1.64355945698794e-299	1.10663	0.998	0.823	5.98222771154471e-295	PTPN13
306	ENSG00000040199	1.65821701751983e-299	1.7335	0.889	0.31	6.03557830036867e-295	PHLPP2
307	ENSG00000038945	4.16837289801138e-299	1.45797	0.989	0.428	1.51720436741818e-294	MSR1
308	ENSG00000075702	1.33895291773299e-297	2.9577	0.388	0.047	4.87352082996452e-293	WDR62
309	ENSG00000226005	1.38418272162109e-297	5.92129	0.202	0.004	5.03814827015644e-293	LINC02660
310	ENSG00000125257	1.79395644587662e-296	2.87826	0.42	0.057	6.52964267170172e-292	ABCC4
311	ENSG00000152422	8.85663430727332e-295	2.45936	0.728	0.227	3.22363775516134e-290	XRCC4
312	ENSG00000183317	2.25143931556082e-294	1.86649	0.724	0.186	8.19478882077829e-290	EPHA10
313	ENSG00000170624	3.05274018622591e-293	1.26197	0.995	0.665	1.11113637298251e-288	SGCD
314	ENSG00000148948	4.79382660541357e-293	-6.71867	0.089	0.712	1.74485700783843e-288	LRRC4C
315	ENSG00000158158	1.0302783498991e-292	1.95989	0.607	0.128	3.75000713796273e-288	CNNM4
316	ENSG00000253582	4.14624218032858e-292	1.61994	0.915	0.348	1.509149228796e-287	OXR1-AS1
317	ENSG00000122966	2.72448369025204e-290	2.83105	0.39	0.048	9.91657573577937e-286	CIT
318	ENSG00000136828	8.84250448248473e-290	1.67261	0.875	0.304	3.21849478153479e-285	RALGPS1
319	ENSG00000197321	9.16061233478919e-290	1.54612	0.951	0.389	3.33427967761657e-285	SVIL
320	ENSG00000286257	1.09878813327035e-289	1.74826	0.84	0.266	3.99936904747742e-285
321	ENSG00000139173	2.0723192881905e-289	1.79627	0.572	0.11	7.54282774515579e-285	TMEM117
322	ENSG00000154122	7.67487718240537e-289	1.50754	0.97	0.474	2.79350179685191e-284	ANKH
323	ENSG00000159023	2.2524431540266e-288	1.3413	0.991	0.734	8.19844259202603e-284	EPB41
324	ENSG00000198948	2.44127311698882e-288	2.02952	0.664	0.162	8.88574589121591e-284	MFAP3L
325	ENSG00000198948	2.44127311698882e-288	2.02952	0.664	0.162	8.88574589121591e-284	MFAP3L
326	ENSG00000286619	7.15682197943047e-288	2.97029	0.395	0.052	2.6049400640731e-283
327	ENSG00000167081	1.76158299343475e-286	1.42554	0.989	0.528	6.4118097795038e-282	PBX3
328	ENSG00000137642	7.87500121997154e-286	1.68806	0.842	0.278	2.86634294404524e-281	SORL1
329	ENSG00000267579	5.34206345090811e-285	4.55593	0.254	0.015	1.94440425486153e-280
330	ENSG00000116329	6.71427522799418e-285	2.25029	0.543	0.107	2.44386189748532e-280	OPRD1
331	ENSG00000121440	8.53165689375007e-285	1.43566	0.976	0.418	3.10535247618715e-280	PDZRN3
332	ENSG00000162437	1.70876212059334e-284	2.16621	0.535	0.101	6.21955236653563e-280	RAVER2
333	ENSG00000287722	4.65954308738699e-284	5.85838	0.206	0.006	1.69598049294712e-279
334	ENSG00000180611	4.92483419391801e-284	2.00029	0.607	0.133	1.79254114990228e-279	MB21D2
335	ENSG00000229105	3.19096661067541e-283	2.96017	0.372	0.045	1.16144802695363e-278	ASTN2-AS1
336	ENSG00000166762	3.38184875138605e-283	1.75508	0.816	0.264	1.23092530852949e-278	CATSPER2
337	ENSG00000168843	8.29236675758068e-283	0.677764	1	0.979	3.01825565242422e-278	FSTL5
338	ENSG00000171385	2.23456657340669e-282	2.91756	0.399	0.054	8.13337541388566e-278	KCND3
339	ENSG00000177570	3.03007233917426e-282	1.30038	0.988	0.66	1.10288573001265e-277	SAMD12
340	ENSG00000186952	5.43443589566179e-282	1.43788	0.985	0.583	1.97802597730298e-277	TMEM232
341	ENSG00000088367	1.12365358718359e-281	2.46937	0.512	0.096	4.08987432663084e-277	EPB41L1
342	ENSG00000203780	1.2844886961218e-281	1.79976	0.751	0.213	4.67528195614411e-277	FANK1
343	ENSG00000177679	3.49348173822823e-281	1.36892	0.979	0.558	1.27155748308031e-276	SRRM3
344	ENSG00000158270	1.73781726134299e-280	2.51325	0.426	0.063	6.32530726783621e-276	COLEC12
345	ENSG00000070601	4.94708283212319e-278	1.51064	0.956	0.447	1.8006392092362e-273	FRMPD1
346	ENSG00000187514	5.23673828540822e-277	-2.296	0.698	0.892	1.90606800112288e-272	PTMA
347	ENSG00000186094	1.32521346529944e-276	1.01846	0.997	0.833	4.8235119709969e-272	AGBL4
348	ENSG00000254377	3.33416223302974e-276	1.50564	0.936	0.405	1.21356836957816e-271	MIR124-2HG
349	ENSG00000225885	7.30921076196186e-276	1.71732	0.791	0.246	2.66040653313888e-271
350	ENSG00000073060	3.26947698104015e-275	2.5691	0.455	0.075	1.19002423155899e-270	SCARB1
351	ENSG00000139116	1.51717364865718e-274	1.44201	0.972	0.497	5.52220864638239e-270	KIF21A
352	ENSG00000168309	2.86792577846313e-274	1.55636	0.914	0.355	1.04386762484501e-269	FAM107A
353	ENSG00000142541	3.18071675341279e-273	-2.12417	0.781	0.915	1.15771728390719e-268	RPL13A
354	ENSG00000147614	1.18325951522981e-272	1.77884	0.845	0.299	4.30682798353345e-268	ATP6V0D2
355	ENSG00000047849	2.58033117411883e-272	1.29952	0.994	0.661	9.39188940755773e-268	MAP4
356	ENSG00000197416	2.29807913751081e-271	5.11985	0.201	0.007	8.36454844471184e-267	FABP12
357	ENSG00000160188	4.45018357673715e-270	3.15023	0.313	0.031	1.61977781826079e-265	RSPH1
358	ENSG00000162139	1.75182209903715e-269	2.18444	0.513	0.099	6.37628207607543e-265	NEU3
359	ENSG00000128000	6.61031648313599e-269	1.54904	0.905	0.365	2.40602299353184e-264	ZNF780B
360	ENSG00000181381	7.44062198486884e-269	3.70772	0.264	0.019	2.70823759005256e-264	DDX60L
361	ENSG00000147403	7.57902771698061e-269	-2.29916	0.724	0.898	2.7586145084266e-264	RPL10
362	ENSG00000250243	8.87705153599538e-269	2.33146	0.506	0.098	3.2310692180716e-264
363	ENSG00000110274	9.16466581163079e-269	1.43421	0.97	0.52	3.33575506211738e-264	CEP164
364	ENSG00000139132	1.62829696762593e-267	1.38364	0.967	0.435	5.92667530276487e-263	FGD4
365	ENSG00000064651	6.15727477260758e-267	1.67171	0.911	0.4	2.24112487173371e-262	SLC12A2
366	ENSG00000086189	2.49488271709223e-266	1.81544	0.673	0.174	9.08087411367229e-262	DIMT1
367	ENSG00000139517	3.36778165303196e-266	2.0775	0.579	0.131	1.22580516607057e-261	LNX2
368	ENSG00000236049	3.01260492946505e-264	5.25599	0.199	0.007	1.09652794222669e-259	LINC01920
369	ENSG00000132694	3.42207784725493e-264	1.35851	0.981	0.5	1.24556789484385e-259	ARHGEF11
370	ENSG00000145349	6.06404697942679e-263	0.981907	0.995	0.847	2.20719181957176e-258	CAMK2D
371	ENSG00000154978	9.03633974125463e-263	1.2649	0.99	0.621	3.28904693902186e-258	VOPP1
372	ENSG00000164574	9.29745297234349e-262	2.3296	0.447	0.075	3.38408693287358e-257	GALNT10
373	ENSG00000186951	1.25948914669904e-261	1.86251	0.662	0.174	4.58428859615517e-257	PPARA
374	ENSG00000105784	3.29689573229058e-261	1.62969	0.765	0.232	1.20000410863913e-256	RUNDC3B
375	ENSG00000259925	4.16031193681252e-261	3.87412	0.249	0.017	1.51427033876102e-256
376	ENSG00000128596	1.19026573300719e-260	2.57547	0.563	0.138	4.33232921499956e-256	CCDC136
377	ENSG00000135205	1.92443306124821e-260	1.57089	0.829	0.286	7.00455145633122e-256	CCDC146
378	ENSG00000204767	2.15529587933095e-260	4.95971	0.205	0.008	7.84484594158878e-256	INSYN2B
379	ENSG00000187416	5.79885625520401e-260	1.50601	0.922	0.375	2.11066769976916e-255	LHFPL3
380	ENSG00000214140	2.40110754966808e-259	2.37274	0.456	0.079	8.73955125928188e-255	PRCD
381	ENSG00000163041	3.45445862349148e-259	-2.14051	0.751	0.899	1.25735384977843e-254	H3-3A
382	ENSG00000258776	5.20440995285679e-259	1.335	0.989	0.528	1.89430113464081e-254
383	ENSG00000231607	1.08704483267118e-256	-2.23301	0.781	0.913	3.95662578195655e-252	DLEU2
384	ENSG00000174842	3.90631835953632e-256	1.63745	0.798	0.263	1.42182175650403e-251	GLMN
385	ENSG00000204410	2.57616341365575e-255	2.09488	0.515	0.103	9.3767195930242e-251	MSH5
386	ENSG00000188312	4.86282385368863e-255	1.51821	0.859	0.304	1.76997062626559e-250	CENPP
387	ENSG00000139988	3.89219047417977e-254	3.56535	0.236	0.015	1.41667948879195e-249	RDH12
388	ENSG00000248550	1.18706411467209e-253	1.2127	0.995	0.723	4.32067596458348e-249	OTX2-AS1
389	ENSG00000149403	1.54221590827581e-253	1.32829	0.973	0.448	5.61335746294228e-249	GRIK4
390	ENSG00000233006	4.24560429514448e-252	1.77715	0.618	0.152	1.54531505134669e-247	MIR3936HG
391	ENSG00000167526	6.96917754487984e-252	-2.16247	0.67	0.885	2.53664124278536e-247	RPL13
392	ENSG00000104490	4.2681792206391e-251	1.83371	0.637	0.165	1.55353187272822e-246	NCALD
393	ENSG00000138669	1.1303367410978e-250	2.75685	0.315	0.035	4.11419967024778e-246	PRKG2
394	ENSG00000157423	5.06275932424042e-250	1.40029	0.958	0.48	1.84274313883703e-245	HYDIN
395	ENSG00000124171	7.40337197721529e-250	1.66113	0.747	0.228	2.69467933226682e-245	PARD6B
396	ENSG00000115556	4.05365668324758e-249	1.69693	0.715	0.21	1.47544995956845e-244	PLCD4
397	ENSG00000088387	4.49404441628428e-249	1.42921	0.915	0.362	1.63574228663915e-244	DOCK9
398	ENSG00000117020	3.14942479229068e-248	-1.28622	0.973	0.975	1.14632763589796e-243	AKT3
399	ENSG00000158220	4.9606556337212e-248	3.52457	0.252	0.019	1.80557943756184e-243	ESYT3
400	ENSG00000138639	3.59095584374892e-247	0.732912	0.789	0.227	1.30703610800773e-242	ARHGAP24
401	ENSG00000105186	6.25627207104706e-247	2.76093	0.359	0.049	2.27715790841971e-242	ANKRD27
402	ENSG00000168944	1.24563093597147e-246	1.76802	0.601	0.144	4.53384748074894e-242	CEP120
403	ENSG00000114757	3.62982388888723e-246	1.2654	0.995	0.876	1.32118329907717e-241	PEX5L
404	ENSG00000001460	1.65714354387751e-245	2.22691	0.453	0.083	6.03167107100536e-241	STPG1
405	ENSG00000270207	3.35170513309841e-245	2.45179	0.414	0.069	1.21995363434516e-240
406	ENSG00000254129	4.8362654094563e-245	3.043	0.288	0.028	1.7603038837339e-240
407	ENSG00000198363	6.63194007768633e-245	1.47213	0.937	0.474	2.41389354947627e-240	ASPH
408	ENSG00000147613	7.2146169946417e-245	2.78978	0.354	0.049	2.62597629370968e-240	PSKH2
409	ENSG00000204442	8.53857452340864e-245	-5.99246	0.053	0.634	3.10787035503028e-240	NALF1
410	ENSG00000122584	2.41474555694235e-244	3.40414	0.251	0.02	8.78919087815876e-240	NXPH1
411	ENSG00000198938	2.7161537408043e-243	-2.48238	0.751	0.924	9.88625638577951e-239	MT-CO3
412	ENSG00000082438	4.01916641986923e-243	1.22639	0.993	0.587	1.462896193504e-238	COBLL1
413	ENSG00000226009	6.45980429149847e-243	2.46998	0.398	0.063	2.35123956601961e-238	KCNIP2-AS1
414	ENSG00000131504	1.23874047091707e-242	2.04827	0.529	0.115	4.50876756604395e-238	DIAPH1
415	ENSG00000186468	2.37052079500665e-242	-2.31179	0.654	0.854	8.6282215896652e-238	RPS23
416	ENSG00000173715	3.44399785347479e-242	1.58262	0.803	0.277	1.25354633870775e-237	C11orf80
417	ENSG00000277443	3.93939187777978e-242	-2.74665	0.471	0.8	1.43385985567429e-237	MARCKS
418	ENSG00000159733	9.74300595991008e-242	2.41208	0.405	0.067	3.54625930928807e-237	ZFYVE28
419	ENSG00000142534	1.26722675153257e-241	-2.15621	0.689	0.868	4.61245193022826e-237	RPS11
420	ENSG00000166689	1.70598969692615e-241	1.25208	0.984	0.576	6.20946129887181e-237	PLEKHA7
421	ENSG00000115525	1.7100146905859e-241	1.88505	0.483	0.093	6.22411147079455e-237	ST3GAL5
422	ENSG00000104365	2.76173098891542e-241	1.70462	0.623	0.156	1.00521484534544e-236	IKBKB
423	ENSG00000103460	1.33422098979497e-240	-4.46153	0.116	0.666	4.85629755865574e-236	TOX3
424	ENSG00000253184	1.77482065324399e-240	1.34797	0.848	0.289	6.45999221367748e-236
425	ENSG00000096968	1.8971537035684e-240	1.51464	0.764	0.243	6.90526005024827e-236	JAK2
426	ENSG00000183287	2.04533217201676e-240	4.07045	0.223	0.014	7.44460003970662e-236	CCBE1
427	ENSG00000133805	2.41188662783422e-240	2.24351	0.413	0.069	8.77878494799101e-236	AMPD3
428	ENSG00000198570	4.17008083622569e-240	1.29426	0.985	0.592	1.51782602276943e-235	RD3
429	ENSG00000225087	1.50478862872354e-239	3.10578	0.288	0.03	5.47712965082793e-235
430	ENSG00000101384	9.15381429631943e-239	2.71359	0.333	0.043	3.33180532757435e-234	JAG1
431	ENSG00000115935	2.36913632725752e-238	1.68849	0.544	0.121	8.62318240395193e-234	WIPF1
432	ENSG00000110436	2.84612401869773e-238	1.36987	0.902	0.346	1.0359322203256e-233	SLC1A2
433	ENSG00000196588	2.7561175861544e-237	1.32055	0.966	0.543	1.00317167900848e-232	MRTFA
434	ENSG00000065621	3.47183056883525e-237	2.16465	0.459	0.088	1.26367689044465e-232	GSTO2
435	ENSG00000286863	8.18010660960764e-237	1.67643	0.718	0.221	2.97739520376499e-232
436	ENSG00000223935	8.76819947061496e-237	1.72068	0.658	0.185	3.19144924331443e-232	LGALSL-DT
437	ENSG00000093217	3.63979829248627e-236	1.66955	0.618	0.16	1.32481378249915e-231	XYLB
438	ENSG00000161800	5.022099604742e-236	1.66322	0.724	0.222	1.82794381413399e-231	RACGAP1
439	ENSG00000230448	7.02170708532365e-236	1.99469	0.527	0.12	2.5557609449161e-231	LINC00276
440	ENSG00000196083	8.4479089826817e-236	3.01895	0.312	0.038	3.07486991151648e-231	IL1RAP
441	ENSG00000003989	3.71863349717524e-235	2.66713	0.373	0.058	1.35350822030185e-230	SLC7A2
442	ENSG00000109667	4.18266113394619e-235	1.90352	0.563	0.137	1.52240499953374e-230	SLC2A9
443	ENSG00000003987	6.46326170461424e-235	1.59115	0.733	0.228	2.35249799524549e-230	MTMR7
444	ENSG00000057294	2.80046072044131e-234	2.36097	0.393	0.064	1.01931169302623e-229	PKP2
445	ENSG00000145425	2.98822250551424e-234	-2.17965	0.678	0.862	1.08765322755707e-229	RPS3A
446	ENSG00000231782	6.84622663692296e-234	2.83346	0.358	0.053	2.49188957130722e-229	LINC00575
447	ENSG00000184009	1.03225800645008e-233	-2.41531	0.575	0.826	3.75721269187699e-229	ACTG1
448	ENSG00000104219	1.3761721446377e-233	1.32728	0.933	0.401	5.00899137205231e-229	ZDHHC2
449	ENSG00000163378	2.26497622154358e-233	1.48877	0.771	0.248	8.24406045117432e-229	EOGT
450	ENSG00000120756	2.54781652606107e-233	1.75378	0.6	0.153	9.27354259155707e-229	PLS1
451	ENSG00000253496	3.74172442384685e-233	1.19484	0.989	0.441	1.36191285579178e-228
452	ENSG00000248343	2.14122258543887e-232	2.28578	0.441	0.084	7.79362196648039e-228
453	ENSG00000142937	3.13232975209114e-232	-2.31499	0.608	0.838	1.14010538316613e-227	RPS8
454	ENSG00000092931	5.24407148529793e-232	1.38944	0.938	0.449	1.90873713921874e-227	MFSD11
455	ENSG00000175497	8.20442368931709e-232	-2.92838	0.722	0.856	2.98624613443763e-227	DPP10
456	ENSG00000170832	9.32626962283921e-232	1.31259	0.964	0.539	3.39457561732102e-227	USP32
457	ENSG00000163399	8.44467647271596e-231	1.64037	0.678	0.195	3.07369334253916e-226	ATP1A1
458	ENSG00000170153	4.48756593974241e-230	1.28586	0.959	0.465	1.63338425074744e-225	RNF150
459	ENSG00000166444	7.73105361483692e-230	1.47049	0.867	0.339	2.81394889472834e-225	DENND2B
460	ENSG00000229922	1.09305520267024e-229	5.00151	0.183	0.008	3.97850232667912e-225	LINC02865
461	ENSG00000287645	2.87080119578929e-229	1.47395	0.797	0.275	1.04491421924339e-224
462	ENSG00000116703	6.84243980672576e-229	1.1581	0.957	0.413	2.49051124085204e-224	PDC
463	ENSG00000198846	1.5796246072291e-228	-6.05249	0.026	0.596	5.74951764539249e-224	TOX
464	ENSG00000153310	4.39345866565983e-228	1.3218	0.945	0.464	1.59913108512687e-223	CYRIB
465	ENSG00000151746	7.5002655785523e-228	0.984381	0.997	0.837	2.72994666528147e-223	BICD1
466	ENSG00000182667	2.04193050661785e-227	1.09678	0.995	0.538	7.43221865798763e-223	NTM
467	ENSG00000145675	6.18611172067816e-227	-1.84658	0.804	0.918	2.25162094409244e-222	PIK3R1
468	ENSG00000183780	4.93020013102847e-226	-3.48332	0.249	0.73	1.79449424369174e-221	SLC35F3
469	ENSG00000137877	5.56631172313413e-226	2.08835	0.446	0.087	2.02602614098636e-221	SPTBN5
470	ENSG00000138641	1.21211801728865e-225	1.43902	0.805	0.289	4.41186715932723e-221	HERC3
471	ENSG00000088854	1.51086084912867e-225	1.23947	0.964	0.538	5.49923131865852e-221	DNAAF9
472	ENSG00000117569	1.94781099993786e-225	-1.28892	0.947	0.949	7.08964247757382e-221	PTBP2
473	ENSG00000152208	2.96869854707746e-225	-6.90004	0.037	0.595	1.08054689716525e-220	GRID2
474	ENSG00000259370	3.63591017975199e-225	3.25226	0.261	0.025	1.32339858722613e-220
475	ENSG00000102763	5.09088958184699e-225	1.19454	0.976	0.586	1.85298199000067e-220	VWA8
476	ENSG00000112699	1.13837549431362e-224	1.27053	0.908	0.358	4.14345912420271e-220	GMDS
477	ENSG00000137486	1.19581419124791e-224	1.61614	0.677	0.199	4.35252449330416e-220	ARRB1
478	ENSG00000251031	2.23324214100274e-224	2.26457	0.377	0.061	8.12855474482178e-220
479	ENSG00000124766	1.42247390252162e-223	-3.06045	0.337	0.739	5.17752051039819e-219	SOX4
480	ENSG00000175766	1.82752314141794e-223	4.29836	0.197	0.011	6.65181873013303e-219	EIF4E1B
481	ENSG00000116604	5.77102262102612e-223	1.6745	0.673	0.199	2.10053681360109e-218	MEF2D
482	ENSG00000144959	1.9148020318568e-222	2.35938	0.353	0.054	6.96949643555238e-218	NCEH1
483	ENSG00000052126	6.02258674245012e-222	0.838488	0.999	0.909	2.19210112251699e-217	PLEKHA5
484	ENSG00000257458	1.32035821734119e-219	2.25814	0.407	0.075	4.80583983947847e-215
485	ENSG00000182534	1.85638842013309e-219	1.96548	0.467	0.097	6.75688257160042e-215	MXRA7
486	ENSG00000128573	1.87961992854481e-219	-6.01522	0.052	0.596	6.8414406159174e-215	FOXP2
487	ENSG00000076554	1.13522447316318e-218	1.27003	0.928	0.415	4.13199003741934e-214	TPD52
488	ENSG00000076554	1.13522447316318e-218	1.27003	0.928	0.415	4.13199003741934e-214	TPD52
489	ENSG00000171735	1.61733608518628e-218	0.945571	0.995	0.819	5.88677988286102e-214	CAMTA1
490	ENSG00000114346	1.64253370933744e-218	1.91623	0.515	0.121	5.97849419524643e-214	ECT2
491	ENSG00000115904	1.15906063683901e-217	1.29573	0.852	0.322	4.21874890596663e-213	SOS1
492	ENSG00000169554	1.27071061061777e-217	-3.42027	0.232	0.695	4.62513248052657e-213	ZEB2
493	ENSG00000051382	1.75631958940504e-217	1.38181	0.805	0.292	6.39265204151646e-213	PIK3CB
494	ENSG00000135049	1.93091531849389e-217	1.06383	0.988	0.729	7.02814557625407e-213	AGTPBP1
495	ENSG00000183853	2.04929283651298e-217	1.83756	0.547	0.137	7.45901606633995e-213	KIRREL1
496	ENSG00000105193	3.44198970061202e-217	-2.28792	0.582	0.817	1.25281541122876e-212	RPS16
497	ENSG00000108298	1.06133946725315e-216	-2.35526	0.564	0.811	3.86306339290801e-212	RPL19
498	ENSG00000115963	6.57128974269254e-216	3.22654	0.292	0.036	2.39181804054523e-211	RND3
499	ENSG00000185774	1.05207048430521e-215	1.99224	0.924	0.569	3.82932614877409e-211	KCNIP4
500	ENSG00000251600	3.20827132710661e-215	1.5415	0.56	0.141	1.16774659764026e-210
501	ENSG00000162688	3.56635286910268e-215	1.55648	0.811	0.316	1.29808111729599e-210	AGL
502	ENSG00000187164	4.55236633492973e-215	1.24217	0.941	0.484	1.65697029858772e-210	SHTN1
503	ENSG00000141404	5.2447090899504e-215	1.25946	0.919	0.402	1.90896921456015e-210	GNAL
504	ENSG00000029534	7.77825472369137e-215	2.80732	0.313	0.043	2.83112915432918e-210	ANK1
505	ENSG00000169856	1.34177479007312e-213	-6.34113	0.016	0.566	4.88379188090816e-209	ONECUT1
506	ENSG00000198804	1.52437040312e-213	-2.39791	0.566	0.851	5.54840339327616e-209	MT-CO1
507	ENSG00000197585	1.53089130034327e-213	1.86542	0.73	0.255	5.57213815498942e-209
508	ENSG00000113356	1.12688136716831e-212	2.06589	0.467	0.103	4.10162280021923e-208	POLR3G
509	ENSG00000180891	2.49939808630219e-212	1.44122	0.786	0.281	9.09730915452272e-208	CUEDC1
510	ENSG00000119912	7.8961264967147e-212	1.34005	0.846	0.326	2.87403212227422e-207	IDE
511	ENSG00000179104	8.60796142011663e-212	-1.9223	0.782	0.891	3.13312579769405e-207	TMTC2
512	ENSG00000250699	1.23030416879946e-211	1.6447	0.571	0.148	4.47806111359628e-207
513	ENSG00000183831	1.91969328873584e-211	2.77343	0.294	0.037	6.9872996323407e-207	ANKRD45
514	ENSG00000133816	2.02420579069947e-211	2.51398	0.361	0.06	7.36770423698792e-207	MICAL2
515	ENSG00000162643	2.13577406508411e-211	3.90128	0.199	0.013	7.77379044209313e-207	DNAI3
516	ENSG00000171914	2.38770600722464e-211	1.10914	0.988	0.55	8.69077232509626e-207	TLN2
517	ENSG00000226824	2.85474274680565e-211	1.33058	0.917	0.442	1.03906926498232e-206
518	ENSG00000260364	4.14792808421133e-211	4.62203	0.17	0.007	1.50976286409124e-206
519	ENSG00000132359	5.98991847363865e-211	1.29192	0.89	0.387	2.180210526035e-206	RAP1GAP2
520	ENSG00000166840	7.13744041351561e-211	2.61715	0.293	0.037	2.59788556171141e-206	GLYATL1
521	ENSG00000233008	8.92971319195444e-210	1.39328	0.615	0.172	3.25023700760758e-205	LINC01725
522	ENSG00000233008	8.92971319195444e-210	1.39328	0.615	0.172	3.25023700760758e-205	LINC01725
523	ENSG00000145743	9.36287815166771e-210	0.993317	0.995	0.754	3.40790038964401e-205	FBXL17
524	ENSG00000255311	1.4003873754771e-209	2.75207	0.298	0.039	5.09712996926156e-205	DLG2-AS2
525	ENSG00000134152	1.47548270243138e-209	1.27542	0.923	0.434	5.37046194030974e-205	KATNBL1
526	ENSG00000153956	1.75890357124794e-209	-1.05275	0.996	0.988	6.40205721862826e-205	CACNA2D1
527	ENSG00000238266	2.77881940423822e-209	5.31662	0.15	0.004	1.01143468675463e-204	LINC00707
528	ENSG00000113296	2.33934089504689e-208	1.44163	0.691	0.216	8.51473298979166e-204	THBS4
529	ENSG00000140988	2.95604701333151e-208	-2.29783	0.541	0.805	1.0759419919124e-203	RPS2
530	ENSG00000186472	6.11510458115774e-208	0.975463	0.99	0.728	2.22577576544979e-203	PCLO
531	ENSG00000245648	1.31533348336568e-207	5.88958	0.147	0.004	4.78755081275438e-203	KLRK1-AS1
532	ENSG00000165959	1.49337791037521e-207	1.33001	0.862	0.348	5.43559691818369e-203	CLMN
533	ENSG00000087274	2.60961650351734e-207	1.29467	0.918	0.461	9.49848214950242e-203	ADD1
534	ENSG00000155754	9.42864246048437e-207	1.66816	0.576	0.154	3.4318372827671e-202	C2CD6
535	ENSG00000163116	1.08032268856735e-206	1.366	0.726	0.243	3.93215852184742e-202	STPG2
536	ENSG00000139921	1.51429944245102e-206	-2.08939	0.621	0.824	5.51174711063322e-202	TMX1
537	ENSG00000226869	5.23104544679075e-206	2.22921	0.376	0.067	1.9039959217229e-201	LHFPL3-AS1
538	ENSG00000159200	1.08749546424775e-205	1.43781	0.701	0.225	3.95826599076897e-201	RCAN1
539	ENSG00000065534	6.25952644890272e-205	1.23076	0.932	0.438	2.27834243687161e-200	MYLK
540	ENSG00000109762	6.47914707287438e-205	1.32924	0.783	0.275	2.35827995158482e-200	SNX25
541	ENSG00000118271	7.26703384121326e-205	3.28202	0.237	0.023	2.6450549775248e-200	TTR
542	ENSG00000198727	8.94463823431375e-205	-2.15182	0.623	0.869	3.25566942452552e-200	MT-CYB
543	ENSG00000167083	1.06486821921451e-204	1.53953	0.643	0.187	3.87590734429698e-200	GNGT2
544	ENSG00000146416	1.54016067149437e-204	1.25565	0.915	0.415	5.60587681210522e-200	AIG1
545	ENSG00000244383	3.66405405266575e-204	1.80045	0.514	0.127	1.33364239408928e-199	FAM3D-AS1
546	ENSG00000101542	5.26025689583353e-204	-4.71633	0.122	0.618	1.91462830494549e-199	CDH20
547	ENSG00000160145	9.32562875729697e-204	-1.66072	0.719	0.883	3.39434235508095e-199	KALRN
548	ENSG00000287125	9.53941723121553e-204	2.30682	0.386	0.072	3.47215708381783e-199
549	ENSG00000177548	1.2225535795231e-203	2.4804	0.341	0.055	4.44985051874819e-199	RABEP2
550	ENSG00000080561	1.6025452179885e-203	3.20498	0.232	0.022	5.83294408443455e-199	MID2
551	ENSG00000140367	1.6793062134013e-203	1.30319	0.798	0.292	6.11233875553803e-199	UBE2Q2
552	ENSG00000235166	2.08461405936096e-203	1.44424	0.731	0.262	7.58757825326202e-199	LINC01440
553	ENSG00000225329	1.57106076134228e-201	3.65517	0.205	0.016	5.71834695913363e-197	LHFPL3-AS2
554	ENSG00000143641	2.02296602286212e-201	1.32114	0.848	0.355	7.36319173001354e-197	GALNT2
555	ENSG00000127252	2.90538454375934e-201	1.63328	0.532	0.133	1.05750186623753e-196	PLAAT1
556	ENSG00000189337	3.36659518285835e-201	1.21504	0.869	0.355	1.22537331465678e-196	KAZN
557	ENSG00000107099	8.07595367598493e-201	1.11446	0.989	0.514	2.939485618985e-196	DOCK8
558	ENSG00000258700	9.02045314127204e-201	4.03038	0.202	0.015	3.2832645343602e-196	LINC00871
559	ENSG00000145362	1.01386701621562e-200	0.998161	0.99	0.719	3.6902731656216e-196	ANK2
560	ENSG00000147642	1.03023298962112e-200	1.71319	0.565	0.154	3.74984203562295e-196	SYBU
561	ENSG00000236279	1.14070922520708e-200	4.36473	0.174	0.009	4.15195343790875e-196	CLEC2L
562	ENSG00000115350	2.17616823827693e-200	2.18118	0.357	0.061	7.92081715368036e-196	POLE4
563	ENSG00000105640	2.90433043398666e-200	-2.20394	0.591	0.81	1.05711819136246e-195	RPL18A
564	ENSG00000117791	1.0931010923047e-199	2.76092	0.267	0.032	3.97866935577066e-195	MTARC2
565	ENSG00000176597	1.3920693296816e-199	2.47388	0.262	0.03	5.06685394617508e-195	B3GNT5
566	ENSG00000105372	2.02553045725054e-199	-2.22916	0.593	0.803	7.37252575830051e-195	RPS19
567	ENSG00000119227	2.1109812523486e-199	2.56384	0.315	0.047	7.68354956229843e-195	PIGZ
568	ENSG00000179399	3.98140989947121e-199	1.04536	0.994	0.685	1.44915357520953e-194	GPC5
569	ENSG00000122778	4.9276790278305e-199	1.55478	0.527	0.13	1.79357661254975e-194	KIAA1549
570	ENSG00000086062	6.22361649455821e-199	1.81692	0.491	0.118	2.2652719316893e-194	B4GALT1
571	ENSG00000137154	6.69179725667793e-199	-2.3989	0.526	0.782	2.43568036548563e-194	RPS6
572	ENSG00000249776	1.13185173665608e-198	3.6518	0.223	0.02	4.11971395108082e-194
573	ENSG00000070214	2.32109579068338e-198	1.12753	0.972	0.479	8.44832445892938e-194	SLC44A1
574	ENSG00000175287	2.42045553723802e-198	2.18402	0.414	0.086	8.80997406443894e-194	PHYHD1
575	ENSG00000139946	5.4688148709601e-198	1.32711	0.751	0.267	1.99053923673206e-193	PELI2
576	ENSG00000120549	8.3744975081555e-198	-2.13971	0.655	0.847	3.04814960301844e-193	KIAA1217
577	ENSG00000089159	8.49594385321507e-198	1.82103	0.477	0.11	3.09235364369322e-193	PXN
578	ENSG00000158079	6.10411399871603e-197	1.55957	0.544	0.142	2.22177541325266e-192	PTPDC1
579	ENSG00000198712	6.34857164262241e-197	-2.15167	0.701	0.89	2.3107531064817e-192	MT-CO2
580	ENSG00000023171	1.42510157055927e-196	1.04015	0.995	0.676	5.18708469652162e-192	GRAMD1B
581	ENSG00000065320	4.77279781297866e-196	3.43709	0.217	0.019	1.73720294796797e-191	NTN1
582	ENSG00000048471	1.28771573609353e-194	1.21669	0.929	0.483	4.68702773623322e-190	SNX29
583	ENSG00000185261	1.37244518494769e-194	1.10312	0.981	0.633	4.99542598417259e-190	KIAA0825
584	ENSG00000239642	5.55020472128533e-194	2.21541	0.374	0.071	2.02016351445343e-189	MEIKIN
585	ENSG00000106546	6.34346296270571e-194	2.14098	0.401	0.081	2.30889364916562e-189	AHR
586	ENSG00000281128	6.71278950370024e-194	1.90713	0.435	0.094	2.44332112355681e-189	PTENP1-AS
587	ENSG00000147647	7.04341443949302e-194	2.81589	0.298	0.044	2.56366198768667e-189	DPYS
588	ENSG00000286071	8.60432182718802e-194	3.26554	0.226	0.022	3.1318010586599e-189
589	ENSG00000165406	1.2251941707088e-193	1.17525	0.956	0.542	4.4594617425459e-189	MARCHF8
590	ENSG00000085433	1.90116109888596e-193	1.56904	0.621	0.189	6.91984616772512e-189	WDR47
591	ENSG00000084207	1.35286758174128e-192	-2.58613	0.466	0.752	4.92416742402192e-188	GSTP1
592	ENSG00000286924	2.45138210487405e-192	1.98984	0.386	0.074	8.92254058532057e-188
593	ENSG00000287306	3.80859974784705e-192	2.46135	0.287	0.04	1.38625413622137e-187
594	ENSG00000140416	1.49019849034181e-191	1.5541	0.655	0.212	5.42402446514614e-187	TPM1
595	ENSG00000244302	1.85705017622606e-191	1.64985	0.475	0.11	6.75929123142762e-187	PEX5L-AS2
596	ENSG00000164398	1.83839350733464e-190	1.25234	0.796	0.287	6.69138468799664e-186	ACSL6
597	ENSG00000068650	2.89458668063772e-190	1.15997	0.922	0.443	1.05357166001852e-185	ATP11A
598	ENSG00000205325	7.42260250991144e-190	3.42416	0.217	0.02	2.70167886155757e-185
599	ENSG00000122406	7.72533209614105e-190	-2.08712	0.613	0.802	2.81186637635342e-185	RPL5
600	ENSG00000156959	1.97537396286978e-189	1.45712	0.685	0.228	7.18996615005341e-185	LHFPL4
601	ENSG00000286685	1.07952976416937e-188	3.44596	0.216	0.02	3.92927243562369e-184
602	ENSG00000169760	1.90225896231161e-188	-5.79596	0.059	0.552	6.92384217102179e-184	NLGN1
603	ENSG00000095015	2.34934826850407e-188	1.28872	0.796	0.306	8.55115782770113e-184	MAP3K1
604	ENSG00000156482	9.51127504151503e-188	-2.06712	0.639	0.805	3.46191388961064e-183	RPL30
605	ENSG00000213981	1.90675167985482e-187	3.56485	0.189	0.014	6.94019476433559e-183
606	ENSG00000146263	3.51578016468132e-187	1.30234	0.8	0.314	1.27967366434071e-182	MMS22L
607	ENSG00000280650	6.23911871694688e-187	1.97932	0.434	0.098	2.27091443059432e-182	KCNIP4-IT1
608	ENSG00000188107	6.32081274427398e-187	0.530862	1	0.986	2.30064942266084e-182	EYS
609	ENSG00000103489	9.26709075162523e-187	1.56361	0.613	0.193	3.37303569177655e-182	XYLT1
610	ENSG00000267476	1.0790630389016e-186	1.30704	0.696	0.231	3.92757364899406e-182
611	ENSG00000115419	6.81697123206457e-186	1.10015	0.955	0.53	2.48124118904686e-181	GLS
612	ENSG00000287159	7.70013258053398e-186	1.31669	0.687	0.227	2.80269425666276e-181
613	ENSG00000233620	1.12691569787101e-185	2.07668	0.375	0.074	4.1017477571109e-181	USH2A-AS2
614	ENSG00000177990	1.26847792049651e-185	1.28622	0.752	0.277	4.61700593502318e-181	DPY19L2
615	ENSG00000168675	1.60026684411459e-185	0.986174	0.991	0.592	5.82465125920829e-181	LDLRAD4
616	ENSG00000089009	2.86201807352546e-185	-2.01736	0.656	0.814	1.0417173384018e-180	RPL6
617	ENSG00000278535	6.22574502358224e-185	2.8413	0.221	0.022	2.26604667368346e-180	DHRS11
618	ENSG00000205129	6.95157014573144e-185	1.36142	0.595	0.172	2.53023250164333e-180	C4orf47
619	ENSG00000285679	4.2740169944043e-184	1.10295	0.785	0.29	1.55565670562328e-179
620	ENSG00000143947	8.02378819694206e-184	-2.11448	0.597	0.796	2.92049842792297e-179	RPS27A
621	ENSG00000251432	8.57620287139641e-184	1.14697	0.917	0.441	3.12156632113087e-179	LINC02615
622	ENSG00000156011	9.19371024262484e-184	1.1644	0.941	0.541	3.34632665411059e-179	PSD3
623	ENSG00000129493	1.1315770203946e-183	1.46199	0.618	0.192	4.11871403883226e-179	HEATR5A
624	ENSG00000136935	1.60101396886853e-183	1.42343	0.642	0.203	5.82737064388766e-179	GOLGA1
625	ENSG00000175806	2.16770570316632e-183	1.31542	0.712	0.25	7.89001521838479e-179	MSRA
626	ENSG00000215018	2.61404423303442e-183	2.11641	0.331	0.057	9.5145981993987e-179	COL28A1
627	ENSG00000112530	9.4838957989218e-183	1.09185	0.906	0.408	3.45194839289156e-178	PACRG
628	ENSG00000141447	2.30295798540452e-182	1.44339	0.693	0.242	8.38230647527537e-178	OSBPL1A
629	ENSG00000286886	4.23723093619305e-182	1.83514	0.415	0.091	1.54226731615555e-177
630	ENSG00000196296	1.04919485357916e-181	2.60184	0.262	0.034	3.81885942805742e-177	ATP2A1
631	ENSG00000010810	1.0594835577522e-181	-3.90898	0.133	0.59	3.85630825350646e-177	FYN
632	ENSG00000069849	1.38872104442184e-181	1.4795	0.602	0.182	5.05466685748661e-177	ATP1B3
633	ENSG00000183826	2.82566076739099e-181	1.02522	0.981	0.634	1.02848400611497e-176	BTBD9
634	ENSG00000254361	5.87333663491581e-181	3.6034	0.198	0.017	2.13777706837666e-176
635	ENSG00000198732	1.34022431432529e-180	2.47265	0.292	0.044	4.87814845928118e-176	SMOC1
636	ENSG00000198597	1.81775656566015e-180	-1.50444	0.893	0.887	6.6162703476898e-176	ZNF536
637	ENSG00000151067	2.15227670245493e-180	1.2207	0.86	0.377	7.83385674159545e-176	CACNA1C
638	ENSG00000151067	2.15227670245493e-180	1.2207	0.86	0.377	7.83385674159545e-176	CACNA1C
639	ENSG00000263574	2.3901209753337e-180	1.76997	0.506	0.137	8.69956232601962e-176
640	ENSG00000008083	4.33304989137574e-180	1.08442	0.949	0.514	1.57714349946294e-175	JARID2
641	ENSG00000172264	4.75763986768723e-180	0.9708	0.993	0.628	1.7316857590408e-175	MACROD2
642	ENSG00000171316	7.77196105391974e-180	-0.959207	0.983	0.965	2.8288383844057e-175	CHD7
643	ENSG00000124140	1.56351137140705e-179	1.8764	0.45	0.108	5.69086868964739e-175	SLC12A5
644	ENSG00000236373	2.19501666555981e-179	5.74906	0.126	0.003	7.98942165930461e-175	LINC02653
645	ENSG00000125899	4.71248676817718e-179	4.94324	0.144	0.006	1.71525093388113e-174	LINC02871
646	ENSG00000226702	1.63869186781204e-178	-2.79145	0.265	0.676	5.96451066046224e-174	MIR217HG
647	ENSG00000145708	1.98795797320391e-178	6.9413	0.113	0.002	7.23576943086759e-174	CRHBP
648	ENSG00000162814	2.62066613743339e-178	1.37636	0.613	0.189	9.53870060703004e-174	SPATA17
649	ENSG00000284862	4.59260789144458e-178	1.97941	0.386	0.079	1.671617420328e-173	CCDC39
650	ENSG00000248019	6.98296642119318e-178	1.67537	0.425	0.095	2.54166011798589e-173	FAM13A-AS1
651	ENSG00000187672	8.9494160312831e-178	0.975619	0.988	0.65	3.25740844706642e-173	ERC2
652	ENSG00000151623	1.29104959938679e-177	1.20452	0.526	0.141	4.69916233184805e-173	NR3C2
653	ENSG00000152503	1.43331337706337e-177	1.19009	0.849	0.357	5.21697402983527e-173	TRIM36
654	ENSG00000137210	4.06800391256235e-177	0.957939	0.988	0.643	1.48067206409444e-172	TMEM14B
655	ENSG00000120992	4.95189956955836e-177	1.18745	0.86	0.369	1.80239240532785e-172	LYPLA1
656	ENSG00000197756	5.12498609342757e-177	-1.81519	0.679	0.829	1.86539243828577e-172	RPL37A
657	ENSG00000132475	1.6778207836589e-176	-1.53074	0.813	0.892	6.10693208836167e-172	H3-3B
658	ENSG00000232885	1.74424197523366e-176	1.21854	0.725	0.251	6.34869194145549e-172	GPC5-AS2
659	ENSG00000140950	2.03211787017662e-176	1.58937	0.523	0.144	7.39650262386887e-172	MEAK7
660	ENSG00000131368	2.52990349911394e-176	1.29309	0.752	0.283	9.20834275607494e-172	MRPS25
661	ENSG00000287478	2.83753406850544e-176	1.77068	0.416	0.093	1.03280565025461e-171
662	ENSG00000205838	3.27600566143302e-176	1.77406	0.437	0.102	1.19240054064839e-171	TTC23L
663	ENSG00000267065	3.59093605153572e-176	2.53795	0.297	0.048	1.30702890403797e-171	LINC02080
664	ENSG00000144820	5.01323636454076e-176	2.74022	0.253	0.033	1.82471777196554e-171	ADGRG7
665	ENSG00000141519	2.06690649818278e-175	1.44008	0.55	0.157	7.52312627208567e-171	CCDC40
666	ENSG00000237773	4.3710245587517e-175	2.88641	0.27	0.039	1.59096551889444e-170
667	ENSG00000157851	8.56891910310624e-175	1.17106	0.829	0.35	3.11891517514861e-170	DPYSL5
668	ENSG00000149273	8.8647751752682e-175	-1.89506	0.651	0.811	3.22660086829412e-170	RPS3
669	ENSG00000143845	1.08344297406911e-174	2.36047	0.301	0.05	3.94351573701676e-170	ETNK2
670	ENSG00000140488	1.62299487285817e-174	1.32409	0.756	0.29	5.90737673822916e-170	CELF6
671	ENSG00000288004	1.65519018985507e-174	3.89211	0.169	0.012	6.02456125303447e-170
672	ENSG00000236065	6.61095636742845e-174	1.75538	0.413	0.093	2.40625589861661e-169
673	ENSG00000112306	1.03198546808833e-173	-2.03674	0.604	0.793	3.75622070674792e-169	RPS12
674	ENSG00000198780	1.05930553453373e-173	1.24333	0.712	0.254	3.85566028459586e-169	FAM169A
675	ENSG00000166441	2.69991599395895e-173	-2.06701	0.59	0.782	9.82715423481178e-169	RPL27A
676	ENSG00000129295	3.21756418189962e-173	1.3152	0.611	0.19	1.17112901092782e-168	DNAAF11
677	ENSG00000174498	6.07595667379359e-173	2.38329	0.311	0.054	2.21152671012739e-168	IGDCC3
678	ENSG00000177600	8.50163109193564e-173	-2.14609	0.554	0.761	3.09442368484273e-168	RPLP2
679	ENSG00000171757	9.10259065912316e-173	1.63063	0.476	0.123	3.31316094810765e-168	LRRC34
680	ENSG00000245534	1.53654986989748e-172	1.11867	0.9	0.414	5.59273421645285e-168	RORA-AS1
681	ENSG00000073350	2.88121282418541e-172	1.17226	0.845	0.357	1.04870384374701e-167	LLGL2
682	ENSG00000213626	3.1315322535938e-172	1.20974	0.863	0.387	1.13981510966307e-167	LBH
683	ENSG00000166900	3.45477005761421e-172	1.09126	0.915	0.446	1.25746720557042e-167	STX3
684	ENSG00000164587	4.69479991119215e-172	-1.97144	0.622	0.797	1.70881327167572e-167	RPS14
685	ENSG00000172939	8.06453504169546e-172	1.16618	0.803	0.321	2.93532946447631e-167	OXSR1
686	ENSG00000036672	8.84025151949193e-172	1.73488	0.441	0.108	3.21767474806467e-167	USP2
687	ENSG00000053108	2.56127296686676e-171	1.04562	0.848	0.36	9.32252134480162e-167	FSTL4
688	ENSG00000156313	2.94991216478144e-171	1.20196	0.749	0.283	1.07370902973715e-166	RPGR
689	ENSG00000148303	4.53519118127998e-171	-1.98913	0.607	0.795	1.65071888616229e-166	RPL7A
690	ENSG00000248125	1.00872651114865e-170	3.17529	0.192	0.017	3.67156275527885e-166
691	ENSG00000054690	1.02754850139018e-170	1.67208	0.437	0.104	3.74007103535997e-166	PLEKHH1
692	ENSG00000138642	1.67857461575297e-170	3.83268	0.167	0.012	6.10967588641767e-166	HERC6
693	ENSG00000164010	2.25951950864688e-170	1.73393	0.437	0.105	8.22419910757291e-166	ERMAP
694	ENSG00000100154	2.86798238183375e-170	-1.49678	0.895	0.919	1.04388822733985e-165	TTC28
695	ENSG00000147202	3.67213137757156e-170	1.17193	0.815	0.341	1.3365823788085e-165	DIAPH2
696	ENSG00000170889	6.73986083760245e-170	-2.06736	0.574	0.774	2.45317454767054e-165	RPS9
697	ENSG00000183690	1.12678991201655e-169	1.56475	0.5	0.137	4.10128992175783e-165	EFHC2
698	ENSG00000176571	1.41361501958093e-169	2.87065	0.267	0.04	5.14527594827067e-165	CNBD1
699	ENSG00000109475	2.59271984488773e-169	-2.01399	0.59	0.777	9.43698169142235e-165	RPL34
700	ENSG00000245937	6.1953168423449e-169	1.2039	0.789	0.322	2.2549714242767e-164	SLC12A2-DT
701	ENSG00000250092	6.45493925131112e-169	2.02518	0.393	0.089	2.34946878869222e-164
702	ENSG00000250592	7.08366920815196e-169	1.24292	0.805	0.357	2.57831391838315e-164
703	ENSG00000232682	1.54278975395966e-168	4.25114	0.15	0.008	5.61544614646236e-164
704	ENSG00000119900	1.62219643326529e-168	1.30392	0.637	0.208	5.90447057779902e-164	OGFRL1
705	ENSG00000165097	2.80559409373934e-168	1.33009	0.645	0.216	1.02118013823924e-163	KDM1B
706	ENSG00000151743	3.69008369001541e-168	1.28887	0.724	0.269	1.34311666149181e-163	AMN1
707	ENSG00000086015	4.63437915496993e-168	1.01908	0.962	0.557	1.68682132482596e-163	MAST2
708	ENSG00000154678	8.14297973329893e-168	-1.10693	0.985	0.964	2.96388176332614e-163	PDE1C
709	ENSG00000213741	8.43466509963829e-168	-1.95091	0.608	0.79	3.07004940296634e-163	RPS29
710	ENSG00000135333	1.0628154429556e-167	-6.13479	0.024	0.491	3.8684356492698e-163	EPHA7
711	ENSG00000122735	1.1699262688361e-167	2.08396	0.347	0.069	4.25829763330965e-163	DNAI1
712	ENSG00000164638	1.41698006314608e-167	1.95149	0.4	0.092	5.15752403383909e-163	SLC29A4
713	ENSG00000248538	1.63891246143838e-167	2.33213	0.25	0.034	5.96531357714342e-163	PPP1R3B-DT
714	ENSG00000183778	1.89656129518937e-167	3.29746	0.206	0.022	6.90310380223028e-163	B3GALT5
715	ENSG00000087253	2.74033439704987e-167	1.82112	0.414	0.098	9.97426913838211e-163	LPCAT2
716	ENSG00000160789	2.90661666652565e-167	1.22611	0.718	0.259	1.05795033428201e-162	LMNA
717	ENSG00000188316	4.99938508827954e-167	1.15972	0.759	0.288	1.81967618443199e-162	ENO4
718	ENSG00000115353	7.45660795314514e-167	2.7752	0.232	0.029	2.71405616278577e-162	TACR1
719	ENSG00000215866	9.82819086346029e-167	2.58292	0.277	0.044	3.57726491048228e-162	LINC01356
720	ENSG00000177181	1.45930856378357e-166	1.68059	0.395	0.088	5.31159131045943e-162	RIMKLA
721	ENSG00000100600	5.112076748006e-166	1.6459	0.441	0.109	1.86069369473922e-161	LGMN
722	ENSG00000122026	9.25053170916368e-166	-1.96774	0.611	0.788	3.3670085315014e-161	RPL21
723	ENSG00000089057	9.43748669542182e-166	1.07839	0.945	0.516	3.43505640739964e-161	SLC23A2
724	ENSG00000117115	1.49750428458704e-165	3.6474	0.185	0.017	5.45061609503993e-161	PADI2
725	ENSG00000256061	1.75039589042104e-165	1.1831	0.795	0.32	6.37109096195452e-161	DNAAF4
726	ENSG00000063177	4.36344175122798e-165	-1.88819	0.642	0.796	1.58820552861196e-160	RPL18
727	ENSG00000076344	8.45464156183467e-165	1.99913	0.371	0.081	3.07732043567658e-160	RGS11
728	ENSG00000198242	1.13507250796088e-164	-2.18277	0.539	0.747	4.13143691447602e-160	RPL23A
729	ENSG00000156042	1.42577630101605e-164	1.58259	0.496	0.137	5.18954058043821e-160	CFAP70
730	ENSG00000087460	1.45175545566811e-164	-2.27247	0.437	0.72	5.28409950754077e-160	GNAS
731	ENSG00000158467	1.46755342347062e-164	1.01768	0.933	0.455	5.34160095074837e-160	AHCYL2
732	ENSG00000250564	2.41022098003249e-164	2.76881	0.243	0.033	8.77272232312224e-160	LINC02999
733	ENSG00000246263	3.2686823219627e-164	1.76715	0.399	0.092	1.18973499154798e-159	UBR5-DT
734	ENSG00000231500	4.4251571916021e-164	-2.01092	0.571	0.774	1.61066871459933e-159	RPS18
735	ENSG00000007216	5.07824430183909e-164	5.61042	0.114	0.003	1.84837936098339e-159	SLC13A2
736	ENSG00000203739	5.37585025585494e-164	1.02407	0.932	0.448	1.95670197612608e-159	PRDX6-AS1
737	ENSG00000134516	7.2667574624427e-164	4.70686	0.131	0.006	2.64495438117989e-159	DOCK2
738	ENSG00000255910	7.72614480404161e-164	3.02725	0.199	0.02	2.81216218577506e-159
739	ENSG00000188523	9.83102521266997e-164	3.27268	0.186	0.017	3.57829655690762e-159	CFAP77
740	ENSG00000152217	1.06087940498511e-163	-2.9707	0.268	0.646	3.86138885826479e-159	SETBP1
741	ENSG00000264112	4.0377299091961e-163	1.86441	0.363	0.076	1.4696529323492e-158
742	ENSG00000153944	5.34209841191817e-163	0.636086	0.999	0.944	1.94441697996998e-158	MSI2
743	ENSG00000129038	5.75801785289163e-163	-3.32794	0.18	0.591	2.09580333809549e-158	LOXL1
744	ENSG00000018189	5.88724946071163e-163	0.810365	0.996	0.788	2.14284105870982e-158	RUFY3
745	ENSG00000138326	5.90489550554778e-163	-1.88317	0.651	0.799	2.14926386610928e-158	RPS24
746	ENSG00000105926	1.12592140000117e-162	1.22006	0.664	0.234	4.09812871172427e-158	PALS2
747	ENSG00000188596	2.0674827257018e-162	1.98482	0.362	0.077	7.52522362500942e-158	CFAP54
748	ENSG00000177694	2.14307593719274e-162	1.0234	0.974	0.615	7.80036779619412e-158	NAALADL2
749	ENSG00000142676	2.25503019089278e-162	-1.91307	0.62	0.786	8.20785888881154e-158	RPL11
750	ENSG00000187715	2.55555033036851e-162	2.25793	0.289	0.049	9.3016920924753e-158	KBTBD12
751	ENSG00000221947	1.12749333477138e-161	2.49068	0.242	0.033	4.10385023990089e-157	XKR9
752	ENSG00000069966	1.47458121421789e-161	1.10455	0.903	0.459	5.36718070351029e-157	GNB5
753	ENSG00000111728	1.63815011650718e-161	1.01675	0.859	0.375	5.96253879406284e-157	ST8SIA1
754	ENSG00000150471	1.80035685606226e-161	-1.04594	0.933	0.967	6.55293888469542e-157	ADGRL3
755	ENSG00000005844	3.83066506639959e-161	3.38909	0.182	0.017	1.39428547086812e-156	ITGAL
756	ENSG00000176771	4.34213534618393e-161	0.763064	0.999	0.967	1.58045042330403e-156	NCKAP5
757	ENSG00000135540	1.56007102973924e-160	-1.71845	0.786	0.847	5.67834653404489e-156	NHSL1
758	ENSG00000214960	2.13777843298827e-160	1.16751	0.576	0.179	7.7810859403907e-156	CRPPA
759	ENSG00000001461	6.71600804562009e-160	1.21611	0.696	0.255	2.4444926084448e-155	NIPAL3
760	ENSG00000285572	7.22041066143475e-160	4.43693	0.125	0.005	2.62808507254902e-155
761	ENSG00000101079	2.17645329313784e-159	1.14814	0.866	0.392	7.9218546963631e-155	NDRG3
762	ENSG00000154258	3.33101977266138e-159	4.17504	0.14	0.008	1.21242457685329e-154	ABCA9
763	ENSG00000106078	4.97534423828951e-159	0.861165	0.971	0.451	1.81092579585262e-154	COBL
764	ENSG00000121104	5.74758716813618e-159	1.70931	0.437	0.113	2.09200677745821e-154	FAM117A
765	ENSG00000036530	6.76533940640263e-159	1.14784	0.712	0.264	2.46244823714243e-154	CYP46A1
766	ENSG00000154556	7.91511730991221e-159	0.825705	0.998	0.755	2.88094439846185e-154	SORBS2
767	ENSG00000135298	8.28130559115994e-159	-2.08898	0.671	0.818	3.01422960907039e-154	ADGRB3
768	ENSG00000106348	1.55984746945046e-158	1.9525	0.362	0.08	5.67753281930577e-154	IMPDH1
769	ENSG00000156642	1.6949866532607e-158	1.10336	0.891	0.439	6.16941242053829e-154	NPTN
770	ENSG00000237877	1.84344034001437e-158	1.00668	0.787	0.318	6.70975414958429e-154	LINC01473
771	ENSG00000183576	2.20882888870757e-158	1.18351	0.773	0.317	8.03969538911782e-154	SETD3
772	ENSG00000140443	2.47307841916489e-158	-1.10961	0.951	0.935	9.00151083007638e-154	IGF1R
773	ENSG00000163357	3.08941275629551e-158	5.15537	0.119	0.004	1.12448445503644e-153	DCST1
774	ENSG00000167987	3.19124616931855e-158	1.36849	0.527	0.153	1.16154978070857e-153	VPS37C
775	ENSG00000125166	3.41874786341165e-158	1.42765	0.507	0.145	1.24435584732457e-153	GOT2
776	ENSG00000166006	6.60121557525461e-158	-5.29432	0.025	0.475	2.40271044508117e-153	KCNC2
777	ENSG00000247199	1.06778442855842e-157	1.22224	0.769	0.327	3.88652176306695e-153	FBXO38-DT
778	ENSG00000247199	1.06778442855842e-157	1.22224	0.769	0.327	3.88652176306695e-153	FBXO38-DT
779	ENSG00000254166	1.07801590249198e-157	2.61246	0.266	0.043	3.92376228189031e-153	CASC19
780	ENSG00000137494	1.21253857486681e-157	1.46246	0.499	0.141	4.4133979048002e-153	ANKRD42
781	ENSG00000120053	1.41212976222903e-157	1.47938	0.435	0.109	5.13986990856124e-153	GOT1
782	ENSG00000138029	1.48869065639292e-157	1.16081	0.707	0.263	5.41853625113896e-153	HADHB
783	ENSG00000074211	2.90287971973656e-157	3.12559	0.19	0.019	1.05659016038971e-152	PPP2R2C
784	ENSG00000224167	3.32213339554531e-157	1.66952	0.482	0.137	1.20919011331058e-152	LINC01357
785	ENSG00000100316	3.72697311786738e-157	-1.77081	0.672	0.81	1.35654367544137e-152	RPL3
786	ENSG00000203709	3.94744016395742e-157	2.12783	0.274	0.045	1.43678927087722e-152	MIR29B2CHG
787	ENSG00000115902	4.38178548906153e-157	1.83049	0.362	0.079	1.59488228230862e-152	SLC1A4
788	ENSG00000227227	5.18190118014311e-157	1.56187	0.392	0.09	1.88610839154849e-152
789	ENSG00000216937	1.13190856542224e-156	1.20186	0.708	0.273	4.11992079642385e-152	CCDC7
790	ENSG00000072954	1.15441077180012e-156	1.77673	0.385	0.09	4.20182432719809e-152	TMEM38A
791	ENSG00000101349	1.1850912830195e-156	1.03995	0.836	0.365	4.31349525193437e-152	PAK5
792	ENSG00000137818	1.2834695152214e-156	-1.75599	0.728	0.821	4.67157234150284e-152	RPLP1
793	ENSG00000135951	1.29660931526264e-156	1.38219	0.561	0.179	4.71939858569297e-152	TSGA10
794	ENSG00000171587	1.43991249344279e-156	1.6502	0.416	0.103	5.24099349363306e-152	DSCAM
795	ENSG00000265681	2.03889715198192e-156	-2.03568	0.566	0.757	7.4211778537838e-152	RPL17
796	ENSG00000256717	2.91554924692142e-156	2.27056	0.281	0.048	1.06120161489446e-151	LINC02698
797	ENSG00000048392	3.9946139571568e-156	1.49099	0.434	0.11	1.45395958812593e-151	RRM2B
798	ENSG00000179361	4.05080840418324e-156	1.08903	0.843	0.377	1.47441324295461e-151	ARID3B
799	ENSG00000115423	5.90349350091144e-156	1.52804	0.46	0.124	2.14875356446175e-151	DNAH6
800	ENSG00000230991	4.46752313605959e-155	1.70805	0.333	0.067	1.62608907106297e-150
801	ENSG00000253374	5.18832524082984e-155	5.11273	0.117	0.004	1.88844662115725e-150
802	ENSG00000198899	8.3525665423473e-155	-1.76948	0.799	0.897	3.04016717008357e-150	MT-ATP6
803	ENSG00000177954	1.55396759866454e-154	-2.10779	0.536	0.743	5.65613126561921e-150	RPS27
804	ENSG00000091844	1.58500288094128e-154	1.06853	0.75	0.296	5.76909348605009e-150	RGS17
805	ENSG00000004455	2.30806686721445e-154	1.21815	0.649	0.223	8.40090178328717e-150	AK2
806	ENSG00000163682	9.22928719800325e-154	-1.95065	0.577	0.761	3.35927595432922e-149	RPL9
807	ENSG00000260135	1.01996696618297e-153	3.77333	0.154	0.011	3.71247576351279e-149	MMP2-AS1
808	ENSG00000260661	1.02166950748631e-153	0.96462	0.965	0.566	3.71867267334866e-149
809	ENSG00000146426	1.24470282103188e-153	0.790242	0.995	0.797	4.53046932799185e-149	TIAM2
810	ENSG00000236200	1.55568296881911e-153	1.29061	0.653	0.234	5.66237486990779e-149	KDM4A-AS1
811	ENSG00000197748	1.58726551246768e-153	1.23897	0.53	0.156	5.77732901227986e-149	CFAP43
812	ENSG00000110721	2.04378710614337e-153	1.26331	0.567	0.18	7.43897630894066e-149	CHKA
813	ENSG00000198589	2.13282888049486e-153	0.690112	0.997	0.865	7.7630705592252e-149	LRBA
814	ENSG00000183378	7.02441814991583e-153	4.74827	0.122	0.005	2.55674771820636e-148	OVCH2
815	ENSG00000258603	7.53413382875685e-153	2.29223	0.275	0.047	2.74227403099092e-148
816	ENSG00000103449	7.8138055049845e-153	2.19156	0.297	0.055	2.84406892770426e-148	SALL1
817	ENSG00000132321	8.94755051930248e-153	1.89735	0.341	0.073	3.25672943801572e-148	IQCA1
818	ENSG00000146950	1.37724633339544e-152	1.49734	0.514	0.156	5.01290120429272e-148	SHROOM2
819	ENSG00000050393	2.41352689623729e-152	1.67865	0.393	0.094	8.78475519692449e-148	MCUR1
820	ENSG00000091129	3.7574903304158e-152	0.712893	0.997	0.836	1.36765133046474e-147	NRCAM
821	ENSG00000136237	7.13376084219883e-152	0.96535	0.911	0.442	2.59654627134353e-147	RAPGEF5
822	ENSG00000125691	7.67556988806942e-152	-2.00807	0.568	0.753	2.79375392785951e-147	RPL23
823	ENSG00000198755	9.32930962943699e-152	-2.1274	0.507	0.726	3.39568211892247e-147	RPL10A
824	ENSG00000258144	1.98711255533772e-151	3.76006	0.146	0.01	7.23269227891825e-147	LINC02406
825	ENSG00000183963	2.10757299933579e-151	1.74708	0.388	0.093	7.67114420298239e-147	SMTN
826	ENSG00000114023	2.69698816360674e-151	1.36532	0.555	0.177	9.81649751789582e-147	FAM162A
827	ENSG00000083097	3.12415459814145e-151	0.970223	0.935	0.507	1.13712979063152e-146	DOP1A
828	ENSG00000106780	3.18317988060587e-151	1.01218	0.951	0.554	1.15861381294292e-146	MEGF9
829	ENSG00000236256	3.83912337536483e-151	2.38611	0.337	0.073	1.39736412616529e-146	DIAPH2-AS1
830	ENSG00000152127	4.42750755415437e-151	1.06431	0.886	0.437	1.61152419956111e-146	MGAT5
831	ENSG00000132294	8.12962286351965e-151	0.836313	0.973	0.685	2.95902012986388e-146	EFR3A
832	ENSG00000115840	8.66030064502873e-151	0.998824	0.93	0.517	3.15217622877756e-146	SLC25A12
833	ENSG00000144560	1.19192842354449e-150	1.00874	0.925	0.49	4.33838107601724e-146	VGLL4
834	ENSG00000130413	1.29504318678651e-150	0.912832	0.976	0.629	4.71369819126555e-146	STK33
835	ENSG00000230894	3.35805388655013e-150	3.06281	0.18	0.018	1.22226445362652e-145
836	ENSG00000116353	4.97299436362054e-150	1.40465	0.536	0.168	1.8100704884706e-145	MECR
837	ENSG00000182899	5.08296449719471e-150	-1.93171	0.581	0.758	1.85009741768893e-145	RPL35A
838	ENSG00000134419	6.89016918204867e-150	-2.06267	0.558	0.743	2.50788377888207e-145	RPS15A
839	ENSG00000111674	9.27239834348912e-150	1.09458	0.841	0.376	3.37496754906317e-145	ENO2
840	ENSG00000286068	2.11409288285473e-149	1.10744	0.889	0.46	7.69487527501466e-145
841	ENSG00000107554	3.24004090888745e-149	1.30239	0.602	0.204	1.17931009001686e-144	DNMBP
842	ENSG00000125388	3.28075681210452e-149	1.07276	0.839	0.379	1.1941298644698e-144	GRK4
843	ENSG00000114670	3.59027834850033e-149	1.10324	0.722	0.281	1.30678951328715e-144	NEK11
844	ENSG00000135749	1.16948943549355e-148	1.21482	0.629	0.222	4.25670764730942e-144	PCNX2
845	ENSG00000148408	2.28878337738215e-148	1.06043	0.813	0.367	8.33071373699556e-144	CACNA1B
846	ENSG00000104237	2.50707146943436e-148	0.879894	0.995	0.664	9.12523873444718e-144	RP1
847	ENSG00000101460	2.8584653514588e-148	1.72589	0.37	0.087	1.04042421862397e-143	MAP1LC3A
848	ENSG00000236714	3.04832255812018e-148	4.60549	0.122	0.006	1.10952844470458e-143	LINC01844
849	ENSG00000249345	3.49272632729319e-148	5.05136	0.108	0.003	1.27128252860818e-143	LINC02405
850	ENSG00000139154	9.00944874415279e-148	1.02234	0.916	0.501	3.27925915389673e-143	AEBP2
851	ENSG00000129422	1.10178487335238e-147	1.19485	0.72	0.285	4.010276582028e-143	MTUS1
852	ENSG00000153933	1.78372957143515e-147	1.54955	0.415	0.107	6.49241889410964e-143	DGKE
853	ENSG00000237975	1.82526769831984e-147	1.11822	0.693	0.261	6.64360936834456e-143	FLG-AS1
854	ENSG00000185946	2.03421307161174e-147	1.02783	0.85	0.387	7.40412873805241e-143	RNPC3
855	ENSG00000135083	3.22992390020123e-147	1.04083	0.762	0.311	1.17562770119524e-142	CCNJL
856	ENSG00000079841	6.71007031305572e-147	-7.72317	0.027	0.451	2.44233139254602e-142	RIMS1
857	ENSG00000135862	6.85329701074168e-147	1.44132	0.464	0.13	2.49446304596975e-142	LAMC1
858	ENSG00000118473	1.56236888255321e-146	0.770142	0.995	0.764	5.68671025871717e-142	SGIP1
859	ENSG00000172175	2.03517971090766e-146	0.993271	0.897	0.439	7.40764711176171e-142	MALT1
860	ENSG00000144746	3.13559200407617e-146	1.08493	0.763	0.304	1.14129277764364e-141	ARL6IP5
861	ENSG00000143919	6.04738852110381e-146	0.861069	0.866	0.396	2.20112847391137e-141	CAMKMT
862	ENSG00000008394	7.5975044693145e-146	1.25227	0.551	0.176	2.76533967674109e-141	MGST1
863	ENSG00000174469	1.27499121375594e-145	-3.36091	0.317	0.637	4.64071301982888e-141	CNTNAP2
864	ENSG00000236064	1.57586063433948e-145	3.71096	0.149	0.011	5.73581753686884e-141
865	ENSG00000136141	2.28925940195308e-145	0.847705	0.981	0.567	8.33244637122884e-141	LRCH1
866	ENSG00000154262	2.88460681737103e-145	3.34871	0.153	0.012	1.04993918938671e-140	ABCA6
867	ENSG00000174453	3.45129812337278e-145	1.84644	0.372	0.09	1.25620349094522e-140	VWC2L
868	ENSG00000121933	3.46936008491544e-145	4.51516	0.131	0.008	1.26277768370752e-140	TMIGD3
869	ENSG00000069696	4.45023873767246e-145	3.63538	0.147	0.011	1.61979789573802e-140	DRD4
870	ENSG00000106829	5.6820538131972e-145	1.14532	0.541	0.17	2.06815394692752e-140	TLE4
871	ENSG00000115641	6.90349858880149e-145	1.89929	0.316	0.066	2.51273541635197e-140	FHL2
872	ENSG00000250007	9.55527100979798e-145	0.997908	0.765	0.302	3.47792754214627e-140	GJD2-DT
873	ENSG00000187391	9.84682970185541e-145	0.868616	0.967	0.538	3.58404907488133e-140	MAGI2
874	ENSG00000169439	1.04373396136653e-144	1.03487	0.816	0.368	3.79898287258191e-140	SDC2
875	ENSG00000115355	1.78294947372481e-144	-1.94415	0.564	0.752	6.48957949446355e-140	CCDC88A
876	ENSG00000174628	2.30569049649516e-144	1.01447	0.825	0.378	8.39225226914307e-140	IQCK
877	ENSG00000186073	4.43567355851457e-144	0.949436	0.908	0.452	1.61449646182813e-139	CDIN1
878	ENSG00000132932	5.90846997549206e-144	0.689918	0.998	0.83	2.1505649016796e-139	ATP8A2
879	ENSG00000163565	1.0865989604369e-143	1.45317	0.487	0.146	3.95500289619824e-139	IFI16
880	ENSG00000274020	1.18641268882107e-143	1.9126	0.341	0.077	4.31830490477091e-139	LINC01138
881	ENSG00000123307	1.8769704372031e-143	-1.9326	0.472	0.729	6.83179699733186e-139	NEUROD4
882	ENSG00000204706	1.94410492907316e-143	1.68028	0.307	0.061	7.07615312084047e-139	MAMDC2-AS1
883	ENSG00000187109	2.4804293257938e-143	-1.95911	0.559	0.738	9.02826666002428e-139	NAP1L1
884	ENSG00000227480	2.64078007105992e-143	2.32629	0.228	0.034	9.61191130264391e-139	CCDC148-AS1
885	ENSG00000143398	2.78615485981046e-143	1.04238	0.896	0.46	1.01410464587381e-138	PIP5K1A
886	ENSG00000229846	3.68602118478549e-143	1.22912	0.511	0.155	1.34163799083822e-138
887	ENSG00000149636	3.85367460965779e-143	2.13332	0.259	0.044	1.40266048442324e-138	DSN1
888	ENSG00000185760	5.6440838740442e-143	-8.57332	0.011	0.43	2.05433364847461e-138	KCNQ5
889	ENSG00000185305	5.89833917753181e-143	0.843779	0.984	0.696	2.14687749383803e-138	ARL15
890	ENSG00000188641	1.07103911664342e-142	-5.17842	0.046	0.463	3.8983681767587e-138	DPYD
891	ENSG00000164434	1.55552854380933e-142	-4.93557	0.114	0.509	5.66181279375721e-138	FABP7
892	ENSG00000140044	2.00573736461388e-142	2.95439	0.136	0.009	7.30048285972161e-138	JDP2
893	ENSG00000286889	2.15756610561438e-142	2.087	0.283	0.054	7.85310911121522e-138
894	ENSG00000171858	2.45535418593412e-142	-2.482	0.355	0.648	8.93699816596303e-138	RPS21
895	ENSG00000164985	3.46079066107597e-142	-2.12107	0.464	0.698	1.25965858481843e-137	PSIP1
896	ENSG00000182247	3.66474433589768e-142	0.748981	0.993	0.792	1.33389364338004e-137	UBE2E2
897	ENSG00000134343	4.27600394318022e-142	4.29989	0.132	0.008	1.55637991523874e-137	ANO3
898	ENSG00000171533	4.34179863289593e-142	0.972261	0.922	0.512	1.58032786640146e-137	MAP6
899	ENSG00000168038	8.30884878723083e-142	0.891339	0.857	0.402	3.02425478157628e-137	ULK4
900	ENSG00000113319	8.65114397452359e-142	0.701524	0.997	0.846	3.1488433838471e-137	RASGRF2
901	ENSG00000187699	1.92344926840762e-141	1.25421	0.54	0.175	7.00097064715005e-137	C2orf88
902	ENSG00000213614	2.14636929343493e-141	1.33012	0.64	0.24	7.81235495424446e-137	HEXA
903	ENSG00000197140	3.98114432840952e-141	1.48517	0.43	0.119	1.4490569126545e-136	ADAM32
904	ENSG00000198034	5.67541357335715e-141	-2.01184	0.555	0.74	2.06573703243054e-136	RPS4X
905	ENSG00000161381	6.53754160143747e-141	1.62088	0.409	0.109	2.37953439209121e-136	PLXDC1
906	ENSG00000167216	6.68222968943772e-141	1.652	0.377	0.093	2.43219796236154e-136	KATNAL2
907	ENSG00000286608	8.14269450340263e-141	1.76414	0.299	0.059	2.96377794534849e-136
908	ENSG00000196358	9.04045779063143e-141	1.08649	0.771	0.322	3.29054582663403e-136	NTNG2
909	ENSG00000255650	1.00391507697077e-140	1.31407	0.526	0.169	3.65405009715821e-136	FAM222A-AS1
910	ENSG00000169031	2.10841943652557e-140	2.02997	0.415	0.119	7.67422506506578e-136	COL4A3
911	ENSG00000165566	2.65908946965266e-140	-1.3345	0.741	0.851	9.67855385164175e-136	AMER2
912	ENSG00000147604	3.02585811100664e-140	-1.80371	0.675	0.785	1.1013518352442e-135	RPL7
913	ENSG00000178425	3.80962888080453e-140	1.18135	0.551	0.182	1.38662872003523e-135	NT5DC1
914	ENSG00000226070	4.8508360644914e-140	2.4275	0.225	0.033	1.76560731075358e-135	LINC00951
915	ENSG00000117602	5.98769412231592e-140	1.14639	0.627	0.225	2.17940090664055e-135	RCAN3
916	ENSG00000250295	6.25172756196548e-140	1.51743	0.447	0.128	2.2755037980042e-135	RDH10-AS1
917	ENSG00000164879	7.60453906882879e-140	1.66038	0.313	0.065	2.7679001302723e-135	CA3
918	ENSG00000085563	9.39976144511209e-140	1.68426	0.328	0.072	3.4213251707919e-135	ABCB1
919	ENSG00000085365	1.23316773231943e-139	0.915709	0.945	0.568	4.48848391209627e-135	SCAMP1
920	ENSG00000133112	1.28389435877623e-139	-2.00656	0.517	0.718	4.67311868707373e-135	TPT1
921	ENSG00000285681	1.33637397597256e-139	3.42657	0.163	0.016	4.86413399774494e-135
922	ENSG00000180875	5.47911850665487e-139	1.72441	0.394	0.104	1.99428955405224e-134	GREM2
923	ENSG00000196116	5.71215915805792e-139	0.99815	0.579	0.193	2.07911169034992e-134	TDRD7
924	ENSG00000149294	6.30778824735065e-139	-0.881359	0.986	0.958	2.29590876627069e-134	NCAM1
925	ENSG00000108107	9.1355372733747e-139	-1.90126	0.577	0.744	3.32515285676292e-134	RPL28
926	ENSG00000149972	9.71722693445081e-139	-6.51401	0.03	0.439	3.53687625960141e-134	CNTN5
927	ENSG00000144713	1.06009597514757e-138	-1.94085	0.596	0.748	3.85853733034214e-134	RPL32
928	ENSG00000152582	1.1626432101877e-138	1.10229	0.677	0.261	4.2317887564412e-134	SPEF2
929	ENSG00000122417	2.85548151926425e-138	0.86686	0.962	0.598	1.0393381633818e-133	ODF2L
930	ENSG00000064999	3.25847031621214e-138	0.892542	0.957	0.544	1.1860180256949e-133	ANKS1A
931	ENSG00000161267	4.70258992598084e-138	1.20661	0.517	0.161	1.71164868125851e-133	BDH1
932	ENSG00000145592	8.17556985296492e-138	-2.12801	0.464	0.697	2.97574391508217e-133	RPL37
933	ENSG00000255159	3.53372568890765e-137	1.76285	0.31	0.065	1.28620547624861e-132	DENND2B-AS1
934	ENSG00000106013	3.91307708453189e-137	1.81293	0.309	0.065	1.42428179722792e-132	ANKRD7
935	ENSG00000167552	4.58891442102803e-137	-2.27026	0.466	0.707	1.67027307096578e-132	TUBA1A
936	ENSG00000226770	4.84120726348125e-137	5.05146	0.102	0.003	1.76210261976191e-132	LINC03012
937	ENSG00000187185	1.23348772577598e-136	3.34988	0.158	0.015	4.4896486242794e-132
938	ENSG00000096384	1.98422410906514e-136	-1.5898	0.67	0.795	7.2221789121753e-132	HSP90AB1
939	ENSG00000148700	8.49013609607096e-136	0.904176	0.789	0.334	3.09023973624791e-131	ADD3
940	ENSG00000117971	8.96362253282646e-136	-2.82941	0.41	0.665	3.26257932949817e-131	CHRNB4
941	ENSG00000253944	1.22596308000174e-135	3.98124	0.136	0.01	4.46226041859034e-131	MTUS1-DT
942	ENSG00000157617	1.30143336951638e-135	0.99268	0.805	0.358	4.73695717836573e-131	C2CD2
943	ENSG00000182752	1.33057340469089e-135	2.3138	0.221	0.033	4.84302107839389e-131	PAPPA
944	ENSG00000265204	1.48269294966205e-135	2.30548	0.261	0.048	5.39670579817992e-131
945	ENSG00000152894	2.65650696469624e-135	-4.55697	0.081	0.476	9.66915405010138e-131	PTPRK
946	ENSG00000184985	5.39037561759277e-135	-3.78546	0.112	0.499	1.96198891729142e-130	SORCS2
947	ENSG00000229117	8.20615170141473e-135	-1.61363	0.702	0.795	2.98687509628093e-130	RPL41
948	ENSG00000173421	1.10133658885273e-134	1.87389	0.319	0.071	4.00864491610616e-130	IHO1
949	ENSG00000095002	1.74863774128839e-134	0.93573	0.943	0.59	6.3646916507415e-130	MSH2
950	ENSG00000008988	2.07291959958134e-134	-1.93977	0.516	0.721	7.54501275855615e-130	RPS20
951	ENSG00000091409	2.64830867017885e-134	3.09443	0.191	0.025	9.63931389771698e-130	ITGA6
952	ENSG00000107295	3.19335011050724e-134	0.791443	0.984	0.608	1.16231557322242e-129	SH3GL2
953	ENSG00000125207	3.30970446887231e-134	4.95992	0.097	0.003	1.20466623258014e-129	PIWIL1
954	ENSG00000100077	8.18384458515143e-134	-2.35175	0.433	0.686	2.97875575210342e-129	GRK3
955	ENSG00000101040	1.00322450210556e-133	0.913029	0.914	0.482	3.65153654276381e-129	ZMYND8
956	ENSG00000159082	1.64246136215335e-133	0.939553	0.876	0.417	5.97823086596578e-129	SYNJ1
957	ENSG00000100580	1.99467990803387e-133	1.12334	0.682	0.276	7.2602359292617e-129	TMED8
958	ENSG00000048540	2.32748018800475e-133	0.909872	0.768	0.326	8.47156238829967e-129	LMO3
959	ENSG00000235706	4.18361879481535e-133	1.17609	0.507	0.158	1.52275356893689e-128	DICER1-AS1
960	ENSG00000138193	5.33572124045129e-133	1.95603	0.358	0.091	1.94209581709946e-128	PLCE1
961	ENSG00000112981	6.98892377589588e-133	1.14591	0.557	0.191	2.54382847595058e-128	NME5
962	ENSG00000149346	7.71485742942644e-133	0.954244	0.787	0.34	2.80805380716264e-128	SLX4IP
963	ENSG00000120254	8.51055729711639e-133	0.897221	0.958	0.568	3.09767264500442e-128	MTHFD1L
964	ENSG00000238272	8.98403278218372e-133	3.66601	0.136	0.01	3.27000825205923e-128
965	ENSG00000107954	1.84607086882957e-132	1.30249	0.472	0.146	6.71932874836588e-128	NEURL1
966	ENSG00000139970	2.36996699909148e-132	0.727333	0.994	0.716	8.62620588329319e-128	RTN1
967	ENSG00000093144	3.11074753197448e-132	1.02669	0.631	0.232	1.13224988668807e-127	ECHDC1
968	ENSG00000258526	3.22992362578498e-132	1.00034	0.589	0.211	1.17562760131322e-127
969	ENSG00000233729	4.34874326366906e-132	1.28426	0.526	0.175	1.58285557311026e-127	NCKAP5-AS1
970	ENSG00000120262	4.68961094798059e-132	3.38086	0.141	0.012	1.70692459284597e-127	CCDC170
971	ENSG00000196663	5.43114551354871e-132	1.09535	0.682	0.274	1.97682834402146e-127	TECPR2
972	ENSG00000133401	7.02890200985703e-132	0.749917	0.991	0.733	2.55837975354776e-127	PDZD2
973	ENSG00000185015	8.32553176467665e-132	1.42216	0.425	0.121	3.03032705170701e-127	CA13
974	ENSG00000100266	1.03574553685238e-131	0.969752	0.724	0.292	3.76990660503529e-127	PACSIN2
975	ENSG00000117114	1.05210935962532e-131	-1.92839	0.683	0.782	3.82946764716423e-127	ADGRL2
976	ENSG00000114770	1.24104660756284e-131	0.909805	0.837	0.392	4.51716144220722e-127	ABCC5
977	ENSG00000131650	1.29899650384389e-131	2.48081	0.197	0.027	4.72808747469099e-127	KREMEN2
978	ENSG00000228412	1.34980576101294e-131	2.43866	0.24	0.042	4.9130230089349e-127	LNC-LBCS
979	ENSG00000066084	1.88388094382985e-131	0.847822	0.968	0.61	6.8569498593519e-127	DIP2B
980	ENSG00000188859	2.80575238189601e-131	0.813517	0.964	0.534	1.02123775196251e-126	FAM78B
981	ENSG00000118181	3.12603997344741e-131	-1.92894	0.553	0.724	1.13781602953539e-126	RPS25
982	ENSG00000106080	5.32586075235544e-131	1.53091	0.364	0.091	1.93850679664233e-126	FKBP14
983	ENSG00000114107	7.23638707469361e-131	0.993152	0.696	0.274	2.63390016744698e-126	CEP70
984	ENSG00000077063	7.30479350556622e-131	1.04495	0.644	0.242	2.65879874015599e-126	CTTNBP2
985	ENSG00000265485	2.66985150334774e-130	1.43077	0.36	0.091	9.71772550188512e-126	LINC01915
986	ENSG00000102908	8.29563754348764e-130	0.851787	0.955	0.562	3.01944615307863e-125	NFAT5
987	ENSG00000183605	8.77187391960591e-130	1.34031	0.446	0.132	3.19278666925816e-125	SFXN4
988	ENSG00000038382	1.83421066648806e-129	0.8162	0.981	0.701	6.67615998388325e-125	TRIO
989	ENSG00000177707	2.32891499540157e-129	-3.52198	0.226	0.563	8.47678480026264e-125	NECTIN3
990	ENSG00000066382	3.64654160336456e-129	-0.944772	0.996	0.969	1.32726821279263e-124	MPPED2
991	ENSG00000150510	3.97418963551267e-129	1.03053	0.638	0.238	1.4465255435339e-124	FAM124A
992	ENSG00000073417	5.33365947963967e-129	0.989969	0.638	0.24	1.94134537739925e-124	PDE8A
993	ENSG00000072952	8.67928925689154e-129	2.70776	0.157	0.016	3.15908770372338e-124	IRAG1
994	ENSG00000164199	1.21229134216719e-128	-0.58473	0.999	0.992	4.41249802722014e-124	ADGRV1
995	ENSG00000132122	1.83144408613466e-128	0.807978	0.978	0.665	6.66609018471295e-124	SPATA6
996	ENSG00000105392	1.94437133230638e-128	0.909104	0.946	0.56	7.07712277532876e-124	CRX
997	ENSG00000110090	3.30678883848454e-128	1.26444	0.48	0.151	1.2036050014316e-123	CPT1A
998	ENSG00000132199	3.71224027577898e-128	0.953161	0.835	0.391	1.35118121557803e-123	ENOSF1
999	ENSG00000196277	3.9529014341283e-128	1.78609	0.245	0.044	1.43877706399402e-123	GRM7
1000	ENSG00000009413	4.22155940384849e-128	0.829967	0.953	0.561	1.53656319181277e-123	REV3L
1001	ENSG00000137393	4.72472863214457e-128	2.98667	0.155	0.016	1.71970672752798e-123	RNF144B
1002	ENSG00000089157	4.81455185022763e-128	-2.0505	0.572	0.724	1.75240058244585e-123	RPLP0
1003	ENSG00000161970	6.88521908240484e-128	-1.91161	0.543	0.725	2.50608204161371e-123	RPL26
1004	ENSG00000135549	9.80621871124028e-128	1.12703	0.385	0.101	3.56926748651724e-123	PKIB
1005	ENSG00000122490	1.16491108710764e-127	1.06333	0.634	0.238	4.24004337485439e-123	SLC66A2
1006	ENSG00000085382	2.05063408539873e-127	0.829346	0.916	0.49	7.46389794403428e-123	HACE1
1007	ENSG00000168781	2.14644247944452e-127	1.43045	0.417	0.12	7.81262133668216e-123	PPIP5K1
1008	ENSG00000105792	2.20374974191442e-127	0.92903	0.696	0.277	8.0212083106201e-123	CFAP69
1009	ENSG00000188846	2.328639909932e-127	-2.04929	0.455	0.682	8.4757835441705e-123	RPL14
1010	ENSG00000255326	3.37087608044149e-127	1.94868	0.268	0.053	1.22693147575909e-122
1011	ENSG00000151883	3.78350968772155e-127	1.13621	0.504	0.165	1.37712185613689e-122	PARP8
1012	ENSG00000164066	8.23265558197177e-127	0.857125	0.924	0.504	2.99652197872609e-122	INTU
1013	ENSG00000166669	9.30479287663879e-127	1.13305	0.52	0.174	3.38675851123899e-122	ATF7IP2
1014	ENSG00000225407	1.04132740333191e-126	3.4524	0.133	0.011	3.7902234826475e-122
1015	ENSG00000198001	1.16498583910354e-126	2.05211	0.262	0.051	4.24031545716905e-122	IRAK4
1016	ENSG00000109794	1.66319035978184e-126	1.57427	0.353	0.09	6.05368027153394e-122	FAM149A
1017	ENSG00000169570	1.69268971897094e-126	1.40963	0.394	0.109	6.16105203911043e-122	DTWD2
1018	ENSG00000137601	1.76610639921844e-126	0.87941	0.851	0.403	6.42827407187526e-122	NEK1
1019	ENSG00000177034	2.11479409989733e-126	1.08939	0.668	0.268	7.69742756480631e-122	MTX3
1020	ENSG00000233860	2.33013968659568e-126	1.08767	0.562	0.197	8.48124243127095e-122	SHROOM3-AS1
1021	ENSG00000197980	3.10730168528343e-126	1.17777	0.476	0.15	1.13099566740946e-121	LEKR1
1022	ENSG00000163635	3.69831880602704e-126	0.929252	0.781	0.341	1.34611407901772e-121	ATXN7
1023	ENSG00000180817	5.75336128527429e-126	1.0135	0.835	0.402	2.09410844061414e-121	PPA1
1024	ENSG00000101463	6.33161442567402e-126	0.779037	0.934	0.461	2.30458101865683e-121	SYNDIG1
1025	ENSG00000155816	6.55285885843503e-126	0.629581	0.999	0.734	2.38510956729318e-121	FMN2
1026	ENSG00000146350	8.46251539626765e-126	0.853894	0.787	0.348	3.0801863539335e-121	TBC1D32
1027	ENSG00000143320	8.73767983619454e-126	-6.16906	0.013	0.397	3.18034070677809e-121	CRABP2
1028	ENSG00000174748	8.96426860310006e-126	-1.68191	0.614	0.758	3.26281448615636e-121	RPL15
1029	ENSG00000130751	1.11714217964093e-125	1.93122	0.262	0.051	4.06617410545704e-121	NPAS1
1030	ENSG00000250407	2.20498620181282e-125	3.12127	0.171	0.021	8.0257087773583e-121
1031	ENSG00000118402	3.10162654211891e-125	1.07933	0.61	0.227	1.12893002880044e-120	ELOVL4
1032	ENSG00000177338	3.36811673817013e-125	1.80994	0.347	0.089	1.22592713035916e-120	LINC00469
1033	ENSG00000154511	4.2165478359541e-125	0.962266	0.733	0.314	1.53473908133057e-120	DIPK1A
1034	ENSG00000163412	5.99282534065089e-125	1.9625	0.249	0.046	2.18126856749011e-120	EIF4E3
1035	ENSG00000106701	7.01753583868852e-125	0.836875	0.945	0.544	2.55424269456585e-120	FSD1L
1036	ENSG00000143514	1.33051517241201e-124	1.01957	0.767	0.35	4.84280912454525e-120	TP53BP2
1037	ENSG00000175054	1.46887555174763e-124	0.9164	0.858	0.428	5.34641323325103e-120	ATR
1038	ENSG00000229151	1.94021044793039e-124	1.62977	0.302	0.068	7.06197798837705e-120
1039	ENSG00000229739	2.05729435062498e-124	0.740199	0.667	0.253	7.4881399774048e-120	PDC-AS1
1040	ENSG00000146021	2.72764487628319e-124	1.60326	0.34	0.085	9.92808182069554e-120	KLHL3
1041	ENSG00000083845	1.24651805960432e-123	-2.13227	0.465	0.678	4.53707643334779e-119	RPS5
1042	ENSG00000162992	1.38254461913821e-123	-1.2443	0.843	0.859	5.03218590473924e-119	NEUROD1
1043	ENSG00000025039	3.94688269749514e-123	1.41705	0.393	0.11	1.43658636423428e-118	RRAGD
1044	ENSG00000224957	4.26370950438859e-123	1.73901	0.28	0.059	1.55190498540736e-118	LINC01266
1045	ENSG00000224934	4.53271777598465e-123	1.55248	0.288	0.061	1.64981861610289e-118	GOT1-DT
1046	ENSG00000261617	8.74826571140961e-123	1.7465	0.261	0.052	3.18419375363887e-118	LINC02177
1047	ENSG00000253675	1.26059210824868e-122	2.82054	0.174	0.022	4.58830315560355e-118
1048	ENSG00000153066	1.28538858582744e-122	1.03847	0.581	0.21	4.67855737469472e-118	TXNDC11
1049	ENSG00000117682	1.29595426901618e-122	0.996006	0.771	0.348	4.71701434836507e-118	DHDDS
1050	ENSG00000183423	1.36070125962943e-122	1.84846	0.278	0.059	4.95268044479919e-118	LRIT3
1051	ENSG00000284052	1.54243085106051e-122	1.77881	0.298	0.068	5.61413981169003e-118
1052	ENSG00000198276	1.82971595445253e-122	1.16447	0.473	0.148	6.65980013101632e-118	UCKL1
1053	ENSG00000120049	1.8543447071057e-122	2.12188	0.229	0.04	6.74944386492333e-118	KCNIP2
1054	ENSG00000156500	2.7432568215696e-122	1.33049	0.388	0.106	9.98490617914904e-118	PABIR3
1055	ENSG00000228351	2.85805586621041e-122	2.38352	0.199	0.03	1.04027517418327e-117
1056	ENSG00000136068	4.0585648958898e-122	1.54665	0.311	0.072	1.47723645080597e-117	FLNB
1057	ENSG00000250493	1.90029240096847e-121	1.72495	0.339	0.087	6.91668428104503e-117
1058	ENSG00000132205	2.06247280071404e-121	3.55614	0.115	0.007	7.50698850003896e-117	EMILIN2
1059	ENSG00000090932	2.80697823583746e-121	-5.91108	0.029	0.401	1.02168393828012e-116	DLL3
1060	ENSG00000110700	4.048390674963e-121	-1.78238	0.6	0.734	1.47353323787303e-116	RPS13
1061	ENSG00000150637	4.57161415703058e-121	2.22641	0.204	0.032	1.66397612087599e-116	CD226
1062	ENSG00000122912	5.28757360997747e-121	0.923182	0.787	0.352	1.9245710425596e-116	SLC25A16
1063	ENSG00000106823	9.51209800262828e-121	1.95754	0.266	0.055	3.46221343099664e-116	ECM2
1064	ENSG00000171863	1.07546998207439e-120	-1.73669	0.597	0.736	3.91449564075436e-116	RPS7
1065	ENSG00000198919	1.20713436068738e-120	0.921184	0.879	0.469	4.39372764602992e-116	DZIP3
1066	ENSG00000231401	1.42346366931873e-120	2.02865	0.245	0.047	5.18112306358632e-116
1067	ENSG00000118492	3.05844570783211e-120	3.21971	0.123	0.009	1.11321306873673e-115	ADGB
1068	ENSG00000125354	3.24808085498306e-120	1.20156	0.478	0.157	1.18223646959674e-115	SEPTIN6
1069	ENSG00000243710	3.89834774794829e-120	1.9769	0.239	0.044	1.41892061329822e-115	CFAP57
1070	ENSG00000197386	4.45797686596884e-120	0.906342	0.884	0.467	1.62261441967534e-115	HTT
1071	ENSG00000227533	5.02192092438445e-120	1.43787	0.365	0.098	1.82787877805745e-115	SLC2A1-DT
1072	ENSG00000169851	7.50322504516369e-120	-5.40093	0.037	0.408	2.73102385193868e-115	PCDH7
1073	ENSG00000287195	1.04814824781951e-119	2.91083	0.167	0.021	3.81504999241345e-115
1074	ENSG00000137513	1.09779243978998e-119	0.840256	0.887	0.465	3.99574492234759e-115	NARS2
1075	ENSG00000101935	1.26001076022614e-119	1.05148	0.529	0.182	4.58618716507112e-115	AMMECR1
1076	ENSG00000103599	2.06061461924636e-119	0.857304	0.641	0.248	7.50022509113289e-115	IQCH
1077	ENSG00000161040	2.50348462857467e-119	0.864058	0.793	0.364	9.11218335108607e-115	FBXL13
1078	ENSG00000114391	2.88433213132546e-119	-1.66573	0.621	0.745	1.04983920915984e-114	RPL24
1079	ENSG00000249242	3.15088870476811e-119	1.29801	0.409	0.121	1.1468604707615e-114	TMEM150C
1080	ENSG00000166596	3.20992945388152e-119	3.00697	0.161	0.019	1.1683501226238e-114	CFAP52
1081	ENSG00000121957	6.92330416531205e-119	1.01267	0.675	0.278	2.51994425009028e-114	GPSM2
1082	ENSG00000276115	7.31387937832591e-119	1.27688	0.431	0.13	2.66210581612307e-114
1083	ENSG00000196586	9.15529410873492e-119	1.03732	0.53	0.182	3.33234394969734e-114	MYO6
1084	ENSG00000132872	1.0641430768596e-118	-3.87529	0.107	0.464	3.87326797115359e-114	SYT4
1085	ENSG00000173218	1.19243675132889e-118	2.48218	0.158	0.018	4.3402312874869e-114	VANGL1
1086	ENSG00000181666	1.63262511214084e-118	0.847909	0.917	0.518	5.94242888317023e-114	ZNF875
1087	ENSG00000142949	2.02249745353347e-118	-2.20066	0.383	0.627	7.36148623137114e-114	PTPRF
1088	ENSG00000223813	2.28848407504876e-118	2.47945	0.176	0.024	8.32962433636247e-114	PRR15-DT
1089	ENSG00000109046	2.29470622683444e-118	0.685068	0.988	0.764	8.35227172443201e-114	WSB1
1090	ENSG00000198918	4.67731172123715e-118	-2.1738	0.414	0.651	1.7024479202959e-113	RPL39
1091	ENSG00000166908	6.7622951985954e-118	1.67175	0.339	0.089	2.46134020638475e-113	PIP4K2C
1092	ENSG00000144744	8.16644485022902e-118	0.923655	0.82	0.396	2.97242259658636e-113	UBA3
1093	ENSG00000117400	8.38808086545791e-118	2.32659	0.19	0.028	3.05309367340937e-113	MPL
1094	ENSG00000185842	1.39802361132396e-117	0.826902	0.904	0.49	5.08852634049695e-113	DNAH14
1095	ENSG00000119862	1.42789341245423e-117	1.48469	0.399	0.117	5.19724644265091e-113	LGALSL
1096	ENSG00000214293	1.81177254294965e-117	1.19502	0.471	0.155	6.59448970182814e-113	APTR
1097	ENSG00000140025	2.32049907737426e-117	0.860863	0.806	0.375	8.44615254182683e-113	EFCAB11
1098	ENSG00000108395	2.67756695226632e-117	0.956003	0.845	0.43	9.74580819285894e-113	TRIM37
1099	ENSG00000205683	3.23476560955286e-117	0.753841	0.987	0.725	1.17738998656505e-112	DPF3
1100	ENSG00000255968	4.49335082285629e-117	3.33636	0.128	0.011	1.63548983250323e-112
1101	ENSG00000106392	6.23267893737718e-117	0.793665	0.948	0.542	2.26857047962655e-112	C1GALT1
1102	ENSG00000118307	7.35191698317029e-117	1.11885	0.446	0.14	2.67595074353432e-112	DNAI7
1103	ENSG00000233927	1.10600641691456e-116	-1.81865	0.578	0.71	4.02564215628563e-112	RPS28
1104	ENSG00000121039	1.64655333003097e-116	1.17045	0.555	0.209	5.99312481064671e-112	RDH10
1105	ENSG00000165072	2.27071530142997e-116	1.71024	0.278	0.062	8.26494955414479e-112	MAMDC2
1106	ENSG00000134215	3.66104578566792e-116	1.69899	0.319	0.081	1.33254744506741e-111	VAV3
1107	ENSG00000143162	4.21418323725456e-116	1.4421	0.32	0.079	1.53387841469591e-111	CREG1
1108	ENSG00000088727	8.54448940783032e-116	1.38356	0.382	0.109	3.11002325466208e-111	KIF9
1109	ENSG00000242268	1.36103829644238e-115	0.976556	0.636	0.251	4.95390719139098e-111	LINC02082
1110	ENSG00000159214	1.4204072614558e-115	1.65508	0.309	0.076	5.16999835024683e-111	CCDC24
1111	ENSG00000132600	1.61497551040578e-115	1.05383	0.507	0.172	5.87818786277497e-111	PRMT7
1112	ENSG00000168028	2.68248466373146e-115	-1.84222	0.55	0.706	9.76370767904976e-111	RPSA
1113	ENSG00000116729	2.99994770723758e-115	4.6967	0.091	0.004	1.09192096648033e-110	WLS
1114	ENSG00000237289	3.21310425947498e-115	1.95007	0.278	0.063	1.1695056883637e-110	CKMT1B
1115	ENSG00000237289	3.21310425947498e-115	1.95007	0.278	0.063	1.1695056883637e-110	CKMT1B
1116	ENSG00000198888	5.20654955513681e-115	-2.11323	0.428	0.687	1.89507990707869e-110	MT-ND1
1117	ENSG00000148848	8.1920178924299e-115	1.81515	0.249	0.05	2.98173067248664e-110	ADAM12
1118	ENSG00000165588	1.32763466933445e-114	-0.830159	0.953	0.934	4.83232466944352e-110	OTX2
1119	ENSG00000147488	1.86887160780802e-114	0.846251	0.781	0.361	6.80231887809964e-110	ST18
1120	ENSG00000260232	1.90994935626943e-114	1.32652	0.43	0.136	6.95183366694946e-110	PWRN4
1121	ENSG00000256311	3.40815567703202e-114	-3.8513	0.062	0.424	1.24050050332612e-109
1122	ENSG00000079739	3.42552030353067e-114	1.91044	0.224	0.041	1.24682088007909e-109	PGM1
1123	ENSG00000171722	5.22491829048661e-114	3.20067	0.14	0.015	1.90176575937132e-109	SPATA46
1124	ENSG00000170160	9.10598853815298e-114	1.03568	0.553	0.202	3.31439770811692e-109	CCDC144A
1125	ENSG00000234900	9.56001769356327e-114	4.57784	0.09	0.004	3.47965524010316e-109
1126	ENSG00000268364	1.15855833945253e-113	1.27284	0.351	0.095	4.21692064393931e-109	SMC5-DT
1127	ENSG00000145416	1.5005056770327e-113	-0.597704	0.999	0.989	5.46154056326364e-109	MARCHF1
1128	ENSG00000286380	1.71080205379876e-113	2.05382	0.246	0.05	6.22697731541674e-109
1129	ENSG00000138448	2.57264581815531e-113	0.865863	0.672	0.273	9.36391624892171e-109	ITGAV
1130	ENSG00000134812	3.5824332242478e-113	2.38369	0.188	0.029	1.30393404496172e-108	CBLIF
1131	ENSG00000198794	3.75305549616572e-113	1.08487	0.563	0.21	1.3660371394944e-108	SCAMP5
1132	ENSG00000027001	3.8765367719985e-113	0.853811	0.748	0.328	1.41098185427201e-108	MIPEP
1133	ENSG00000172456	4.06941719021357e-113	0.829543	0.853	0.425	1.48118646889394e-108	FGGY
1134	ENSG00000100749	4.0757111902181e-113	0.964643	0.576	0.214	1.48347735901558e-108	VRK1
1135	ENSG00000249419	4.63586698421067e-113	0.97215	0.591	0.224	1.687362864913e-108
1136	ENSG00000071282	5.6355586497713e-113	2.28367	0.188	0.029	2.05123063734376e-108	LMCD1
1137	ENSG00000234428	5.85379393696219e-113	2.92584	0.125	0.011	2.1306639171755e-108
1138	ENSG00000145391	6.89408666942801e-113	1.09974	0.504	0.176	2.50930966593841e-108	SETD7
1139	ENSG00000270571	1.11718425438984e-112	2.56047	0.16	0.021	4.06632724912814e-108
1140	ENSG00000141337	1.52790218655288e-112	1.04885	0.545	0.197	5.56125837861517e-108	ARSG
1141	ENSG00000133703	1.85301191336633e-112	1.00725	0.62	0.246	6.74459276227078e-108	KRAS
1142	ENSG00000047579	5.64551583473358e-112	1.07483	0.494	0.17	2.05485485352633e-107	DTNBP1
1143	ENSG00000064687	6.67416171497135e-112	0.920507	0.636	0.248	2.42926138101527e-107	ABCA7
1144	ENSG00000133800	7.64942914554426e-112	3.42666	0.124	0.011	2.7842392203952e-107	LYVE1
1145	ENSG00000144426	8.636186448271e-112	0.806804	0.824	0.394	3.14339914344168e-107	NBEAL1
1146	ENSG00000145335	2.06367997194444e-111	0.925157	0.644	0.266	7.51138236188337e-107	SNCA
1147	ENSG00000196428	2.15370824464994e-111	0.815372	0.842	0.425	7.83906726887684e-107	TSC22D2
1148	ENSG00000112294	2.27101629701154e-111	1.70593	0.271	0.061	8.26604511786259e-107	ALDH5A1
1149	ENSG00000184156	2.97035959090909e-111	0.863742	0.753	0.339	1.08115148389909e-106	KCNQ3
1150	ENSG00000197816	2.99067225447674e-111	1.16926	0.403	0.121	1.08854488718444e-106	CCDC180
1151	ENSG00000185442	3.14648595577451e-111	0.921173	0.591	0.228	1.1452579581828e-106	FAM174B
1152	ENSG00000057663	3.27093414895297e-111	-1.07805	0.887	0.873	1.1905546115359e-106	ATG5
1153	ENSG00000103742	4.8069020034975e-111	0.944458	0.673	0.278	1.74961619123302e-106	IGDCC4
1154	ENSG00000171811	5.13366956032803e-111	1.58977	0.317	0.081	1.8685530465682e-106	CFAP46
1155	ENSG00000230773	6.2426990972152e-111	2.99107	0.158	0.02	2.27221761740439e-106
1156	ENSG00000274492	7.60715238857679e-111	2.23775	0.194	0.032	2.76885132639418e-106
1157	ENSG00000150636	9.20563681200728e-111	1.5909	0.258	0.055	3.35066768683441e-106	CCDC102B
1158	ENSG00000224048	1.15344367803168e-110	4.60506	0.088	0.004	4.19830429929971e-106	LINC02612
1159	ENSG00000165757	1.6146336270023e-110	1.05395	0.567	0.216	5.87694347556297e-106	JCAD
1160	ENSG00000163935	1.63922846218811e-110	0.906962	0.677	0.288	5.9664637566723e-106	SFMBT1
1161	ENSG00000265817	1.93912434348853e-110	1.14074	0.469	0.157	7.05802478542956e-106	FSBP
1162	ENSG00000103723	1.97874240871552e-110	1.03391	0.542	0.199	7.20222661924276e-106	AP3B2
1163	ENSG00000144283	3.14992620243165e-110	0.648501	0.979	0.707	1.14651013916107e-105	PKP4
1164	ENSG00000104408	3.24079879234116e-110	-1.7747	0.555	0.698	1.17958594443634e-105	EIF3E
1165	ENSG00000133742	3.29682699241759e-110	1.84519	0.222	0.042	1.19997908870015e-105	CA1
1166	ENSG00000159267	3.51107602933747e-110	0.767202	0.763	0.341	1.27796145315825e-105	HLCS
1167	ENSG00000169598	4.74106510355346e-110	1.66977	0.263	0.058	1.72565287639139e-105	DFFB
1168	ENSG00000164938	5.00676227882098e-110	1.02572	0.48	0.162	1.82236133424526e-105	TP53INP1
1169	ENSG00000172954	6.04296147163332e-110	0.751043	0.944	0.566	2.19951711644509e-105	LCLAT1
1170	ENSG00000170579	1.60788063760292e-109	1.20359	0.413	0.132	5.85236394474711e-105	DLGAP1
1171	ENSG00000285980	2.50184455009436e-109	1.31588	0.381	0.113	9.10621379343347e-105
1172	ENSG00000250410	2.52467145002127e-109	1.47796	0.275	0.063	9.18929914378743e-105	LRP2BP-AS1
1173	ENSG00000163864	2.54896831563783e-109	1.48877	0.33	0.089	9.27773487525858e-105	NMNAT3
1174	ENSG00000188112	3.9404475187177e-109	3.20395	0.119	0.01	1.43424408786287e-104	C6orf132
1175	ENSG00000198626	4.23996965467252e-109	1.31607	0.382	0.114	1.5432641549077e-104	RYR2
1176	ENSG00000251620	4.29124923639016e-109	1.76241	0.231	0.046	1.56192889706129e-104	STPG2-AS1
1177	ENSG00000100280	4.95519752138652e-109	1.09014	0.455	0.149	1.80359279383426e-104	AP1B1
1178	ENSG00000164040	7.72004190937904e-109	-2.27546	0.404	0.621	2.80994085417578e-104	PGRMC2
1179	ENSG00000155975	1.18359354718358e-108	0.858584	0.771	0.353	4.30804379303879e-104	VPS37A
1180	ENSG00000115268	1.27721672211877e-108	-1.77557	0.57	0.713	4.6488134251679e-104	RPS15
1181	ENSG00000235437	3.23261432403286e-108	0.771781	0.871	0.439	1.17660696166148e-103	LINC01278
1182	ENSG00000163637	3.80698067737077e-108	0.638674	0.997	0.781	1.38566482694941e-103	PRICKLE2
1183	ENSG00000038532	4.86513424655261e-108	0.787332	0.883	0.465	1.77081156306022e-103	CLEC16A
1184	ENSG00000185291	5.18135189688608e-108	0.94783	0.517	0.182	1.88590846342859e-103	IL3RA
1185	ENSG00000165449	6.74696336368184e-108	-6.24663	0.023	0.365	2.45575972511292e-103	SLC16A9
1186	ENSG00000255794	7.07531427611578e-108	-5.98277	0.01	0.353	2.57527289022062e-103	RMST
1187	ENSG00000144406	7.45677389779294e-108	0.701504	0.92	0.519	2.71411656331868e-103	UNC80
1188	ENSG00000139174	8.60629967347487e-108	2.49608	0.165	0.023	3.13252095515138e-103	PRICKLE1
1189	ENSG00000138686	1.22053929230842e-107	0.989929	0.562	0.216	4.44251891614417e-103	BBS7
1190	ENSG00000148600	1.36532498212824e-107	0.751325	0.952	0.606	4.96950986995037e-103	CDHR1
1191	ENSG00000122376	1.46058024092778e-107	0.89342	0.637	0.263	5.31621996092894e-103	SHLD2
1192	ENSG00000109689	2.16742015008179e-107	0.869851	0.678	0.285	7.88897586226771e-103	STIM2
1193	ENSG00000254163	2.57695167458399e-107	2.30505	0.179	0.028	9.37958870515079e-103
1194	ENSG00000132640	4.22829679004995e-107	0.857215	0.683	0.288	1.53901546564238e-102	BTBD3
1195	ENSG00000227398	4.88526595846622e-107	0.866968	0.628	0.256	1.77813910356253e-102	KIF9-AS1
1196	ENSG00000123983	5.47139893222988e-107	0.867465	0.765	0.354	1.99147978335303e-102	ACSL3
1197	ENSG00000237515	5.67967573246735e-107	1.81344	0.224	0.044	2.06728837310347e-102	SHISA9
1198	ENSG00000197147	6.92757766175371e-107	0.867801	0.72	0.322	2.52149971732512e-102	LRRC8B
1199	ENSG00000204764	9.73053217978482e-107	0.703832	0.842	0.428	3.54171910279808e-102	RANBP17
1200	ENSG00000269964	1.09512723141053e-106	1.72702	0.256	0.057	3.98604409688804e-102	MEI4
1201	ENSG00000171174	1.17708602280376e-106	1.32778	0.369	0.108	4.28435770580111e-102	RBKS
1202	ENSG00000154099	1.18876646010404e-106	2.13968	0.202	0.036	4.32687216148667e-102	DNAAF1
1203	ENSG00000131089	1.55483790086314e-106	0.747829	0.954	0.619	5.65929899156164e-102	ARHGEF9
1204	ENSG00000243799	1.85332960069726e-106	1.98462	0.199	0.034	6.7457490806179e-102	PEX5L-AS1
1205	ENSG00000160584	1.94211795945497e-106	0.54938	0.994	0.888	7.0689209488242e-102	SIK3
1206	ENSG00000198722	2.00253253720047e-106	0.781292	0.89	0.491	7.28881792890228e-102	UNC13B
1207	ENSG00000183323	2.16563252480723e-106	1.2191	0.408	0.129	7.88246926379334e-102	CCDC125
1208	ENSG00000145819	2.34183251331566e-106	0.912654	0.465	0.156	8.52380198196634e-102	ARHGAP26
1209	ENSG00000166402	3.20752937850231e-106	0.866074	0.746	0.34	1.16747654318727e-101	TUB
1210	ENSG00000167615	3.62804355246428e-106	0.986799	0.52	0.184	1.32053529222595e-101	LENG8
1211	ENSG00000198886	4.33237977424984e-106	-1.51084	0.597	0.776	1.57689959023146e-101	MT-ND4
1212	ENSG00000158023	4.54337342001645e-106	1.1388	0.465	0.161	1.65369705741759e-101	CFAP251
1213	ENSG00000132570	5.27801354543675e-106	0.925803	0.546	0.205	1.92109137026807e-101	PCBD2
1214	ENSG00000074317	7.38534563695372e-106	2.95806	0.142	0.017	2.68811810493842e-101	SNCB
1215	ENSG00000196511	7.83354004501863e-106	0.977588	0.554	0.212	2.85125190558588e-101	TPK1
1216	ENSG00000081148	8.96801023163681e-106	0.607311	0.997	0.774	3.26417636411117e-101	IMPG2
1217	ENSG00000123124	9.83242477007466e-106	0.765876	0.897	0.48	3.57880596781178e-101	WWP1
1218	ENSG00000141449	1.33109904740835e-105	-4.38245	0.093	0.427	4.84493431275693e-101	GREB1L
1219	ENSG00000010626	1.4103434837779e-105	1.13803	0.423	0.136	5.1333682122548e-101	LRRC23
1220	ENSG00000245910	1.96588128756766e-105	-2.08572	0.435	0.632	7.15541471048877e-101	SNHG6
1221	ENSG00000186976	2.42453024465842e-105	0.792676	0.657	0.273	8.82480518450771e-101	EFCAB6
1222	ENSG00000118242	3.02384410390959e-105	0.808637	0.82	0.399	1.10061877694101e-100	MREG
1223	ENSG00000197168	3.18593774575486e-105	1.44592	0.321	0.086	1.15961762069985e-100	NEK5
1224	ENSG00000162929	3.2361542332973e-105	0.863717	0.678	0.291	1.17789541783555e-100	SANBR
1225	ENSG00000176473	3.86692084387023e-105	0.939812	0.518	0.188	1.40748184875189e-100	WDR25
1226	ENSG00000134183	6.72554880498507e-105	1.44987	0.333	0.092	2.44796525403846e-100	GNAT2
1227	ENSG00000069535	7.17093347723701e-105	2.23274	0.201	0.036	2.61007636704473e-100	MAOB
1228	ENSG00000165591	1.2566143872546e-104	1.1219	0.348	0.098	4.57382504672929e-100	FAAH2
1229	ENSG00000251128	1.68603451016561e-104	3.00362	0.142	0.017	6.1368284101008e-100	WWC2-AS1
1230	ENSG00000182774	1.6931138339352e-104	-2.14442	0.403	0.617	6.16259573275736e-100	RPS17
1231	ENSG00000132024	1.70679865066417e-104	1.35015	0.344	0.097	6.21240572868746e-100	CC2D1A
1232	ENSG00000264522	1.76207906798325e-104	0.842972	0.631	0.257	6.41361539164545e-100	OTUD7B
1233	ENSG00000255804	1.94260714161927e-104	4.64107	0.084	0.004	7.07070147406583e-100	OR6J1
1234	ENSG00000109072	2.10395289872604e-104	1.11953	0.395	0.121	7.65796776078304e-100	VTN
1235	ENSG00000101605	2.1945242691058e-104	1.57396	0.25	0.055	7.98762943469131e-100	MYOM1
1236	ENSG00000106069	2.2135046894119e-104	3.36304	0.114	0.01	8.05671436852143e-100	CHN2
1237	ENSG00000135486	3.48914657202878e-104	-2.03225	0.468	0.641	1.26997956928703e-99	HNRNPA1
1238	ENSG00000259336	4.353007285553e-104	0.855527	0.525	0.191	1.58440759179558e-99
1239	ENSG00000104435	5.32934956560575e-104	-3.19641	0.186	0.494	1.93977665488918e-99	STMN2
1240	ENSG00000136231	5.85252941905629e-104	-2.55821	0.224	0.537	2.13020365794811e-99	IGF2BP3
1241	ENSG00000254093	5.86235574654198e-104	1.36888	0.308	0.081	2.13378024462635e-99	PINX1
1242	ENSG00000286592	8.96745600972104e-104	3.34969	0.11	0.009	3.26397463841826e-99	LINC02885
1243	ENSG00000118733	9.35881777091314e-104	1.45853	0.289	0.074	3.40642249225697e-99	OLFM3
1244	ENSG00000255468	1.91898592953516e-103	1.21432	0.434	0.145	6.98472498632208e-99	B4GAT1-DT
1245	ENSG00000254772	2.14503447588493e-103	-1.93804	0.488	0.657	7.80749648532596e-99	EEF1G
1246	ENSG00000178188	6.00931417499325e-103	1.04936	0.512	0.188	2.18727017341404e-98	SH2B1
1247	ENSG00000143469	7.89987485620706e-103	0.691081	0.918	0.503	2.87539645016225e-98	SYT14
1248	ENSG00000240038	9.59244374352672e-103	1.13363	0.38	0.114	3.49145767376885e-98	AMY2B
1249	ENSG00000105053	1.16538539488413e-102	1.14309	0.436	0.144	4.24176976029927e-98	VRK3
1250	ENSG00000204628	1.49332427432408e-102	-1.85887	0.526	0.67	5.4354016936848e-98	RACK1
1251	ENSG00000150760	1.83967023784369e-102	1.00459	0.563	0.224	6.69603173170346e-98	DOCK1
1252	ENSG00000106868	2.401514734673e-102	0.990688	0.588	0.24	8.7410333312628e-98	SUSD1
1253	ENSG00000041515	3.15932806894787e-102	0.69363	0.968	0.615	1.14993223053565e-97	MYO16
1254	ENSG00000154240	5.36077585892785e-102	0.68096	0.955	0.602	1.95121519713256e-97	CEP112
1255	ENSG00000063761	6.47062724521367e-102	1.49037	0.276	0.067	2.35517890471287e-97	ADCK1
1256	ENSG00000183696	7.1448206366152e-102	1.0108	0.362	0.105	2.6005718153152e-97	UPP1
1257	ENSG00000137269	7.42538815254107e-102	1.07035	0.408	0.131	2.7026927797619e-97	LRRC1
1258	ENSG00000237372	7.89889215473304e-102	2.14545	0.165	0.024	2.87503876647973e-97
1259	ENSG00000007866	9.81504115532229e-102	1.39526	0.348	0.102	3.57247867971421e-97	TEAD3
1260	ENSG00000015133	1.0278382161575e-101	-2.55404	0.227	0.526	3.74112553917006e-97	CCDC88C
1261	ENSG00000255557	1.51418767290588e-101	2.31023	0.155	0.022	5.51134029184284e-97
1262	ENSG00000007001	1.86993632997594e-101	0.862432	0.405	0.127	6.80619425384643e-97	UPP2
1263	ENSG00000108669	2.2015486667655e-101	0.802912	0.856	0.456	8.01319683729305e-97	CYTH1
1264	ENSG00000243156	2.76651072619009e-101	0.946539	0.482	0.169	1.00695457411867e-96	MICAL3
1265	ENSG00000111961	2.85591437053572e-101	0.949766	0.54	0.209	1.03949571258759e-96	SASH1
1266	ENSG00000050730	3.38367251075422e-101	4.18523	0.085	0.004	1.23158912046432e-96	TNIP3
1267	ENSG00000184716	3.38972724362686e-101	2.05853	0.209	0.041	1.2337929221353e-96	SERINC4
1268	ENSG00000163697	4.62646893956887e-101	0.802527	0.639	0.268	1.68394216462428e-96	APBB2
1269	ENSG00000237654	4.87978211931241e-101	1.23898	0.385	0.121	1.77614309578733e-96
1270	ENSG00000178974	6.180398271598e-101	0.768979	0.614	0.247	2.24954136289624e-96	FBXO34
1271	ENSG00000104375	6.42539473689448e-101	0.737991	0.735	0.333	2.33871517633485e-96	STK3
1272	ENSG00000178125	7.34253619453989e-101	1.48678	0.283	0.071	2.67253632408863e-96	PPP1R42
1273	ENSG00000111300	7.50785223748247e-101	0.776399	0.91	0.496	2.73270805739887e-96	NAA25
1274	ENSG00000214595	8.74961730613524e-101	0.795784	0.675	0.294	3.18468570708711e-96	EML6
1275	ENSG00000080823	8.89470775993163e-101	0.791518	0.891	0.491	3.23749573045992e-96	MOK
1276	ENSG00000136261	9.26543908596988e-101	0.833811	0.69	0.308	3.37243451851132e-96	BZW2
1277	ENSG00000084090	1.06608386957617e-100	0.824046	0.634	0.258	3.88033206848333e-96	STARD7
1278	ENSG00000183273	1.34513810753624e-100	-1.08218	0.94	0.856	4.8960336838104e-96	CCDC60
1279	ENSG00000072201	1.35048900799565e-100	2.23652	0.169	0.026	4.91550989130257e-96	LNX1
1280	ENSG00000084093	1.96672769188915e-100	1.41365	0.283	0.071	7.15849545293813e-96	REST
1281	ENSG00000180448	2.4804625026604e-100	3.77458	0.097	0.007	9.02838741718331e-96	ARHGAP45
1282	ENSG00000059378	3.10972653108458e-100	2.26354	0.179	0.03	1.13187826278416e-95	PARP12
1283	ENSG00000140743	3.20752906658387e-100	0.997657	0.414	0.135	1.1674764296552e-95	CDR2
1284	ENSG00000156973	3.26011702073173e-100	0.994114	0.553	0.219	1.18661739320593e-95	PDE6D
1285	ENSG00000254187	6.01467267457204e-100	1.99357	0.227	0.048	2.18922056009073e-95
1286	ENSG00000075151	6.74143442591313e-100	0.573602	0.994	0.854	2.45374730234386e-95	EIF4G3
1287	ENSG00000251372	8.15353996637897e-100	1.96969	0.217	0.045	2.96772547696262e-95	LINC00499
1288	ENSG00000242428	1.02334133880591e-99	1.58243	0.267	0.065	3.72475780498574e-95	CFAP20DC-AS1
1289	ENSG00000134058	1.05806924894974e-99	1.00377	0.472	0.167	3.85116045232725e-95	CDK7
1290	ENSG00000238058	1.71448168496251e-99	1.31741	0.311	0.084	6.24037043692654e-95	CAMSAP1-DT
1291	ENSG00000265316	3.98451489065345e-99	2.68194	0.143	0.019	1.45028372990004e-94
1292	ENSG00000175662	4.27130307728551e-99	0.731281	0.827	0.401	1.55466889407038e-94	TOM1L2
1293	ENSG00000143156	4.71724220060691e-99	0.720287	0.925	0.542	1.7169818161769e-94	NME7
1294	ENSG00000135437	7.54648041025135e-99	1.51624	0.277	0.069	2.74676793972328e-94	RDH5
1295	ENSG00000136436	9.51776705294581e-99	1.05394	0.442	0.154	3.46427685193122e-94	CALCOCO2
1296	ENSG00000152601	1.04404486639452e-98	0.665949	0.785	0.368	3.80011450470279e-94	MBNL1
1297	ENSG00000106819	1.21973316242379e-98	1.77421	0.233	0.051	4.4395847645901e-94	ASPN
1298	ENSG00000118007	1.29954408742088e-98	-0.939172	0.929	0.909	4.73008056939453e-94	STAG1
1299	ENSG00000144229	1.39449270850733e-98	-4.75147	0.062	0.385	5.07567456042499e-94	THSD7B
1300	ENSG00000152932	1.72282426939246e-98	0.801906	0.568	0.226	6.27073577573468e-94	RAB3C
1301	ENSG00000087299	1.76406915332131e-98	0.763863	0.716	0.317	6.4208589042589e-94	L2HGDH
1302	ENSG00000164253	2.10256650801672e-98	0.76041	0.687	0.294	7.65292157587927e-94	WDR41
1303	ENSG00000167371	2.27702676069105e-98	-3.23793	0.152	0.457	8.28792200356329e-94	PRRT2
1304	ENSG00000013619	3.09364675107086e-98	0.643736	0.826	0.387	1.12602554445477e-93	MAMLD1
1305	ENSG00000144026	3.3448971481587e-98	1.21389	0.349	0.103	1.2174756639868e-93	ZNF514
1306	ENSG00000105499	4.07034080361866e-98	0.986915	0.403	0.131	1.48152264570112e-93	PLA2G4C
1307	ENSG00000176595	4.84282620665437e-98	1.3367	0.306	0.083	1.76269188269806e-93	KBTBD11
1308	ENSG00000181378	5.48158451538108e-98	2.49196	0.159	0.024	1.99518713190841e-93	CFAP65
1309	ENSG00000156298	6.52222759428702e-98	0.768548	0.8	0.397	2.37396039976859e-93	TSPAN7
1310	ENSG00000196284	7.97153871287329e-98	0.606091	0.992	0.803	2.90148066071162e-93	SUPT3H
1311	ENSG00000184014	8.08271682809146e-98	0.728255	0.849	0.443	2.94194727108873e-93	DENND5A
1312	ENSG00000255502	8.74385093122629e-98	6.28719	0.061	0.001	3.18258686194775e-93	LINC02713
1313	ENSG00000144821	8.87764595648416e-98	1.75684	0.226	0.049	3.2312855752411e-93	MYH15
1314	ENSG00000147799	9.34867888261977e-98	0.965538	0.451	0.154	3.40273213969594e-93	ARHGAP39
1315	ENSG00000137142	1.77102093023247e-97	-5.5115	0.023	0.341	6.44616198186013e-93	IGFBPL1
1316	ENSG00000167281	2.01978851285066e-97	-2.71255	0.263	0.528	7.35162622907382e-93	RBFOX3
1317	ENSG00000177453	2.18867017290176e-97	1.43469	0.265	0.065	7.96632169532784e-93	NIM1K
1318	ENSG00000189283	2.32346553484737e-97	0.624944	0.905	0.509	8.45694985373746e-93	FHIT
1319	ENSG00000138002	3.44312909229125e-97	0.847769	0.611	0.251	1.25323012701217e-92	IFT172
1320	ENSG00000179240	4.04870657788449e-97	0.830659	0.495	0.177	1.4736482202184e-92	GVQW3
1321	ENSG00000174444	4.24364403255666e-97	-2.09408	0.403	0.607	1.54460155496997e-92	RPL4
1322	ENSG00000138587	6.45961681583194e-97	0.911888	0.468	0.165	2.35117132862651e-92	MNS1
1323	ENSG00000143819	7.14985932824564e-97	1.6821	0.257	0.062	2.60240579829485e-92	EPHX1
1324	ENSG00000176261	7.80158227844352e-97	0.783146	0.727	0.333	2.83961991770787e-92	ZBTB8OS
1325	ENSG00000197958	8.84019927918448e-97	-1.98382	0.43	0.627	3.21765573363757e-92	RPL12
1326	ENSG00000175928	1.18458187106475e-96	-4.29216	0.049	0.368	4.31164109430148e-92	LRRN1
1327	ENSG00000196531	1.25295660124071e-96	-1.84883	0.473	0.643	4.56051143719592e-92	NACA
1328	ENSG00000158019	1.5685744146623e-96	0.691253	0.884	0.484	5.70929715448785e-92	BABAM2
1329	ENSG00000265962	1.58609057617296e-96	4.81526	0.073	0.003	5.77305247915434e-92	GACAT2
1330	ENSG00000104812	1.90230444214286e-96	0.988257	0.518	0.2	6.92400770851159e-92	GYS1
1331	ENSG00000124813	2.27886706785444e-96	0.955448	0.523	0.2	8.29462035357659e-92	RUNX2
1332	ENSG00000116171	2.36540910590501e-96	0.855194	0.772	0.389	8.60961606367305e-92	SCP2
1333	ENSG00000144711	2.43339397514987e-96	0.615382	0.98	0.715	8.85706739075048e-92	IQSEC1
1334	ENSG00000113763	2.54902276128364e-96	2.88205	0.122	0.013	9.27793304652018e-92	UNC5A
1335	ENSG00000135929	2.5938735676518e-96	1.3832	0.278	0.071	9.44118101153903e-92	CYP27A1
1336	ENSG00000170959	3.35482084364546e-96	0.689183	0.743	0.345	1.22108769067007e-91	DCDC1
1337	ENSG00000258404	3.73870629175218e-96	4.18741	0.082	0.004	1.36081431607196e-91	LINC02320
1338	ENSG00000102076	4.55817269349349e-96	7.23974	0.061	0.001	1.65908369697776e-91	OPN1LW
1339	ENSG00000206535	4.66387965292705e-96	1.01377	0.426	0.145	1.69755891607239e-91	LNP1
1340	ENSG00000149806	8.00987536247446e-96	-1.67585	0.551	0.682	2.91543443443346e-91	FAU
1341	ENSG00000080293	9.96095584647864e-96	2.11051	0.197	0.038	3.6255887090013e-91	SCTR
1342	ENSG00000121057	1.31917210665415e-95	1.21526	0.344	0.102	4.80152263379976e-91	AKAP1
1343	ENSG00000182993	1.44739542655713e-95	1.12196	0.44	0.156	5.26822987358263e-91	C12orf60
1344	ENSG00000100583	1.88637367708808e-95	1.47368	0.301	0.083	6.86602290986518e-91	SAMD15
1345	ENSG00000166394	2.27526848089181e-95	3.75943	0.09	0.006	8.28152221675e-91	CYB5R2
1346	ENSG00000179270	2.30560955791272e-95	1.21664	0.34	0.101	8.39195766889073e-91	PCARE
1347	ENSG00000250479	2.33176319500141e-95	0.979478	0.527	0.204	8.48715167716613e-91	CHCHD10
1348	ENSG00000146373	2.66714074314311e-95	0.982956	0.431	0.148	9.70785887689228e-91	RNF217
1349	ENSG00000272514	4.07575321854903e-95	1.38366	0.271	0.068	1.48349265648748e-90	CFAP206
1350	ENSG00000183833	4.18151395705555e-95	1.06432	0.374	0.118	1.52198745008908e-90	CFAP91
1351	ENSG00000132535	4.19341703992126e-95	0.810757	0.733	0.337	1.52631993419054e-90	DLG4
1352	ENSG00000127083	4.57704596193229e-95	2.10821	0.192	0.036	1.66595318922412e-90	OMD
1353	ENSG00000048707	5.93356158595018e-95	0.735899	0.809	0.396	2.15969774605415e-90	VPS13D
1354	ENSG00000119335	6.47310653777322e-95	-2.05822	0.346	0.582	2.3560813176187e-90	SET
1355	ENSG00000168672	6.63807476690186e-95	1.36601	0.364	0.116	2.41612645365694e-90	LRATD2
1356	ENSG00000116141	6.94948124599264e-95	0.680606	0.872	0.472	2.5294721839164e-90	MARK1
1357	ENSG00000241288	8.57959256887035e-95	0.658084	0.96	0.575	3.12280010321743e-90	LINC02614
1358	ENSG00000125834	1.0017613050434e-94	1.15996	0.348	0.105	3.64621079809699e-90	STK35
1359	ENSG00000214922	1.17180900722558e-94	4.61536	0.075	0.003	4.26515042449966e-90	HLA-F-AS1
1360	ENSG00000126091	1.2177986579639e-94	0.873372	0.869	0.496	4.43254355525701e-90	ST3GAL3
1361	ENSG00000151789	1.95637678526546e-94	0.126791	0.918	0.516	7.12082022300922e-90	ZNF385D
1362	ENSG00000011566	2.0453203217868e-94	0.564414	0.992	0.8	7.44455690723959e-90	MAP4K3
1363	ENSG00000049323	2.04910300506456e-94	0.443699	0.817	0.382	7.45832511783399e-90	LTBP1
1364	ENSG00000229956	2.90071524073369e-94	0.830075	0.637	0.283	1.05580233332225e-89	ZRANB2-DT
1365	ENSG00000070778	2.99945164825432e-94	0.784745	0.596	0.244	1.09174041093161e-89	PTPN21
1366	ENSG00000134250	3.07599745838989e-94	1.7803	0.19	0.036	1.11960155490475e-89	NOTCH2
1367	ENSG00000007047	3.12985390960316e-94	0.790671	0.672	0.296	1.13920422601736e-89	MARK4
1368	ENSG00000226017	5.09039683517227e-94	0.930082	0.49	0.183	1.852802640066e-89	PRICKLE2-AS3
1369	ENSG00000260838	5.57335418450731e-94	1.52254	0.265	0.067	2.02858945607697e-89
1370	ENSG00000198130	6.48512149556134e-94	0.684565	0.935	0.567	2.36045452195442e-89	HIBCH
1371	ENSG00000276234	6.73602727872904e-94	0.984336	0.466	0.169	2.4517792089118e-89	TADA2A
1372	ENSG00000081479	1.71015685107824e-93	0.689478	0.903	0.496	6.22462890655459e-89	LRP2
1373	ENSG00000234492	2.14350866239246e-93	1.34576	0.29	0.078	7.80194282937607e-89	RPL34-DT
1374	ENSG00000227244	2.24637028378386e-93	1.54859	0.245	0.058	8.17633855891648e-89	LINC00845
1375	ENSG00000109472	2.32470475757828e-93	-0.855433	0.95	0.93	8.46146037663341e-89	CPE
1376	ENSG00000116254	2.69421930894899e-93	2.17427	0.181	0.033	9.80641944071255e-89	CHD5
1377	ENSG00000148672	2.84456131312998e-93	0.772677	0.629	0.266	1.03536342675305e-88	GLUD1
1378	ENSG00000141576	2.97476851259564e-93	0.79778	0.679	0.303	1.08275624321456e-88	RNF157
1379	ENSG00000073969	3.75191663986664e-93	0.760787	0.805	0.402	1.36562261857866e-88	NSF
1380	ENSG00000286530	4.41786941904313e-93	2.47091	0.167	0.028	1.60801611114332e-88
1381	ENSG00000081377	4.73658376914776e-93	1.00144	0.443	0.159	1.7240217602944e-88	CDC14B
1382	ENSG00000034510	4.75279570688191e-93	-1.92411	0.424	0.63	1.72992258139088e-88	TMSB10
1383	ENSG00000165322	8.45887679013221e-93	0.694523	0.917	0.527	3.07886197407232e-88	ARHGAP12
1384	ENSG00000103222	8.61294623718092e-93	0.73767	0.791	0.389	3.13494017140911e-88	ABCC1
1385	ENSG00000099204	1.66833532471444e-92	0.956025	0.393	0.13	6.07240691489563e-88	ABLIM1
1386	ENSG00000165025	2.61867148907848e-92	-2.52384	0.215	0.504	9.53144048594784e-88	SYK
1387	ENSG00000164930	2.75523576284401e-92	1.92869	0.182	0.034	1.00285071295996e-87	FZD6
1388	ENSG00000221882	2.84899038948689e-92	2.9878	0.111	0.011	1.03697552196544e-87	OR3A2
1389	ENSG00000179218	3.10882541819452e-92	-2.5403	0.263	0.521	1.13155027571444e-87	CALR
1390	ENSG00000138771	3.36553747626151e-92	0.722809	0.873	0.478	1.22498833060967e-87	SHROOM3
1391	ENSG00000266049	3.80734806844535e-92	0.819265	0.679	0.308	1.38579854995274e-87
1392	ENSG00000059377	4.90001343414595e-92	1.09975	0.393	0.131	1.78350688976044e-87	TBXAS1
1393	ENSG00000224717	5.77796869697139e-92	1.93365	0.221	0.049	2.10306504632365e-87	LEMD1-DT
1394	ENSG00000184719	6.05133261096784e-92	0.862561	0.434	0.154	2.20256404374007e-87	RNLS
1395	ENSG00000169379	6.92975019924365e-92	0.635794	0.907	0.498	2.5222904775207e-87	ARL13B
1396	ENSG00000173064	7.37772268150314e-92	0.655057	0.961	0.656	2.68534350161351e-87	HECTD4
1397	ENSG00000137177	9.19752701880574e-92	0.698985	0.9	0.517	3.34771588430491e-87	KIF13A
1398	ENSG00000250049	9.33993114441497e-92	2.14509	0.123	0.014	3.39954813794416e-87
1399	ENSG00000103064	1.04583245188647e-91	1.20558	0.295	0.08	3.80662095837637e-87	SLC7A6
1400	ENSG00000165209	1.06267636006944e-91	0.698651	0.899	0.509	3.86792941538073e-87	STRBP
1401	ENSG00000236197	1.20413661181124e-91	0.717551	0.771	0.377	4.38281643967056e-87	PPP1R9A-AS1
1402	ENSG00000226828	1.24710929229432e-91	1.84174	0.216	0.047	4.53922840209286e-87	LINC02774
1403	ENSG00000233930	1.26653752745662e-91	1.38558	0.227	0.051	4.60994329243662e-87	KRTAP5-AS1
1404	ENSG00000164619	1.27196273879943e-91	1.29188	0.358	0.116	4.62968997668217e-87	BMPER
1405	ENSG00000152061	1.34269548956228e-91	0.523308	0.996	0.865	4.8871430429088e-87	RABGAP1L
1406	ENSG00000173376	1.52654282717731e-91	0.860801	0.586	0.249	5.55631058235998e-87	NDNF
1407	ENSG00000227165	1.98369985838279e-91	1.3376	0.271	0.07	7.22027074454167e-87	WDR11-DT
1408	ENSG00000286061	2.8212242379815e-91	1.57888	0.264	0.068	1.02686919814051e-86	RCAN3AS
1409	ENSG00000232656	3.06988525322374e-91	2.45429	0.131	0.017	1.11737683446838e-86	IDI2-AS1
1410	ENSG00000184220	3.47059736096644e-91	-1.07083	0.904	0.887	1.26322802744456e-86	CMSS1
1411	ENSG00000132518	3.61953711618478e-91	1.11467	0.382	0.125	1.31743911954894e-86	GUCY2D
1412	ENSG00000236404	3.74202426668115e-91	0.723266	0.673	0.306	1.36202199258661e-86	VLDLR-AS1
1413	ENSG00000222000	4.76010624272278e-91	0.671295	0.845	0.423	1.73258347022624e-86
1414	ENSG00000231738	5.06155779680745e-91	1.89181	0.197	0.04	1.84230580688198e-86	TSPAN19
1415	ENSG00000180376	5.24707670856706e-91	0.692245	0.613	0.256	1.90983098038424e-86	CCDC66
1416	ENSG00000127928	5.88396210885427e-91	1.45511	0.212	0.046	2.14164452838078e-86	GNGT1
1417	ENSG00000164190	6.59540165931835e-91	-0.764039	0.976	0.937	2.40059429595869e-86	NIPBL
1418	ENSG00000163754	6.71806942349888e-91	1.89299	0.198	0.04	2.44524290876512e-86	GYG1
1419	ENSG00000076944	9.89214716819416e-91	2.16111	0.173	0.031	3.60054372627931e-86	STXBP2
1420	ENSG00000185420	1.01829186206682e-90	0.600291	0.988	0.755	3.70637871955081e-86	SMYD3
1421	ENSG00000132676	1.08499409643445e-90	0.782526	0.722	0.348	3.94916151220212e-86	DAP3
1422	ENSG00000263069	1.15016451838201e-90	0.760415	0.746	0.351	4.18636881400684e-86	RNF213-AS1
1423	ENSG00000118690	1.21801975415525e-90	0.803395	0.578	0.237	4.43334830117427e-86	ARMC2
1424	ENSG00000095951	1.35416892606765e-90	0.800613	0.593	0.251	4.92890405710104e-86	HIVEP1
1425	ENSG00000229272	1.54101542454592e-90	1.25924	0.263	0.067	5.60898794226225e-86	LINC03036
1426	ENSG00000215252	1.67348045537727e-90	0.806405	0.554	0.221	6.09113416148219e-86	GOLGA8B
1427	ENSG00000162244	1.74896424661227e-90	-1.80568	0.529	0.658	6.36588006481933e-86	RPL29
1428	ENSG00000157856	1.94813349714579e-90	3.1258	0.108	0.011	7.09081630291123e-86	DRC1
1429	ENSG00000175193	2.13888828868188e-90	0.801058	0.59	0.248	7.7851255931443e-86	PARL
1430	ENSG00000100505	2.34521350534203e-90	-1.2568	0.832	0.813	8.53610811674392e-86	TRIM9
1431	ENSG00000065609	2.68745981001706e-90	0.522603	0.996	0.833	9.78181621650011e-86	SNAP91
1432	ENSG00000172785	3.37377350144176e-90	0.777129	0.843	0.442	1.22798607905477e-85	ZNG1A
1433	ENSG00000150667	3.95010948563574e-90	1.35502	0.275	0.074	1.4377608505817e-85	FSIP1
1434	ENSG00000166450	4.1872405212625e-90	0.704125	0.919	0.584	1.52407180492913e-85	PRTG
1435	ENSG00000109771	4.55039879729869e-90	1.0373	0.392	0.131	1.65625415424078e-85	LRP2BP
1436	ENSG00000287133	5.76745030608441e-90	1.98934	0.201	0.042	2.0992365624086e-85
1437	ENSG00000231749	6.20133238672516e-90	4.71182	0.072	0.003	2.25716096212022e-85	ABCA9-AS1
1438	ENSG00000277228	6.22013770876281e-90	2.94918	0.121	0.014	2.26400572323549e-85
1439	ENSG00000163273	6.5945831522392e-90	3.81934	0.088	0.006	2.40029637575202e-85	NPPC
1440	ENSG00000134115	6.72351472037494e-90	1.14417	0.208	0.044	2.44722488792207e-85	CNTN6
1441	ENSG00000185974	7.02915270352965e-90	2.31016	0.171	0.031	2.55847100103072e-85	GRK1
1442	ENSG00000089101	8.55600543510222e-90	1.32223	0.28	0.076	3.1142148582685e-85	CFAP61
1443	ENSG00000142875	8.9547599371103e-90	0.463588	0.999	0.921	3.25935352190941e-85	PRKACB
1444	ENSG00000283415	1.30838244114015e-89	1.77942	0.188	0.037	4.76225040926191e-85
1445	ENSG00000286318	1.35902114829288e-89	2.13513	0.172	0.031	4.94656517555641e-85
1446	ENSG00000261170	1.41498472230677e-89	1.88495	0.204	0.043	5.15026139225217e-85
1447	ENSG00000184903	1.68575551233016e-89	-1.81127	0.622	0.742	6.13581291377931e-85	IMMP2L
1448	ENSG00000231646	1.80367608700032e-89	1.21135	0.297	0.084	6.56502022146378e-85	FSIP2-AS1
1449	ENSG00000287363	3.77135146412506e-89	4.98364	0.066	0.002	1.37269650591224e-84	GUCA1ANB
1450	ENSG00000249042	4.26331420963953e-89	0.724156	0.673	0.297	1.55176110602459e-84	FAM151B-DT
1451	ENSG00000175066	4.97162100093593e-89	0.889089	0.443	0.159	1.80957061192066e-84	GK5
1452	ENSG00000139112	5.04123391876867e-89	0.930337	0.451	0.166	1.83490832175342e-84	GABARAPL1
1453	ENSG00000018408	5.10288171045604e-89	1.78094	0.201	0.042	1.85734688497179e-84	WWTR1
1454	ENSG00000243335	6.814213498105e-89	0.936795	0.41	0.142	2.48023742904026e-84	KCTD7
1455	ENSG00000141314	1.05089532401616e-88	-1.72048	0.578	0.697	3.82504880035402e-84	RHBDL3
1456	ENSG00000066855	1.1668724375297e-88	0.709396	0.883	0.496	4.24718229812062e-84	MTFR1
1457	ENSG00000156110	1.24691427447973e-88	0.586186	0.993	0.746	4.53851857625133e-84	ADK
1458	ENSG00000145920	1.269513483272e-88	-3.09	0.107	0.407	4.62077517641343e-84	CPLX2
1459	ENSG00000133794	1.65761683406226e-88	0.793331	0.589	0.247	6.03339375261983e-84	BMAL1
1460	ENSG00000112182	1.69343452169911e-88	0.580101	0.987	0.684	6.16376297208041e-84	BACH2
1461	ENSG00000119636	2.09282270838295e-88	1.04994	0.353	0.112	7.61745609397226e-84	BBOF1
1462	ENSG00000150627	2.27614242893821e-88	0.663877	0.863	0.467	8.28470321284931e-84	WDR17
1463	ENSG00000221823	2.42968603648427e-88	0.705833	0.881	0.503	8.84357123559543e-84	PPP3R1
1464	ENSG00000110514	2.45213710897399e-88	0.776266	0.67	0.301	8.92528864924352e-84	MADD
1465	ENSG00000234084	3.23663588483844e-88	1.34664	0.274	0.073	1.17807072936349e-83
1466	ENSG00000134243	3.6429464507477e-88	0.767025	0.599	0.251	1.32595964914315e-83	SORT1
1467	ENSG00000250903	5.13735676202965e-88	0.644135	0.856	0.464	1.86989511424355e-83	GMDS-DT
1468	ENSG00000124151	8.18044684481777e-88	0.744439	0.567	0.232	2.97751904257677e-83	NCOA3
1469	ENSG00000144847	1.07140081211173e-87	0.611152	0.964	0.68	3.89968467592427e-83	IGSF11
1470	ENSG00000196914	1.40324385943699e-87	0.639753	0.945	0.597	5.10752699957875e-83	ARHGEF12
1471	ENSG00000150938	1.42287126424529e-87	-2.23484	0.286	0.542	5.17896682760002e-83	CRIM1
1472	ENSG00000108684	1.52784081387552e-87	1.9054	0.31	0.098	5.56103499434412e-83	ASIC2
1473	ENSG00000198840	1.77808944015743e-87	-1.5649	0.616	0.75	6.47188994428503e-83	MT-ND3
1474	ENSG00000164949	2.14901556773707e-87	1.22409	0.369	0.124	7.82198686344939e-83	GEM
1475	ENSG00000095397	2.56811734895117e-87	0.720155	0.757	0.358	9.34743352671248e-83	WHRN
1476	ENSG00000145949	2.60124667529426e-87	2.28363	0.144	0.022	9.46801764873605e-83	MYLK4
1477	ENSG00000140199	2.81395777490501e-87	0.633157	0.907	0.536	1.02422435090993e-82	SLC12A6
1478	ENSG00000236449	2.97273112452253e-87	0.945966	0.346	0.108	1.08201467470371e-82
1479	ENSG00000113719	3.25409157479699e-87	1.0548	0.368	0.121	1.18442425139461e-82	ERGIC1
1480	ENSG00000286830	4.35233357294827e-87	1.32697	0.23	0.054	1.58416237388171e-82
1481	ENSG00000271717	7.45763705756949e-87	1.26425	0.339	0.107	2.71443073621414e-82
1482	ENSG00000080644	7.49439266190809e-87	-1.17273	0.716	0.768	2.72780904108131e-82	CHRNA3
1483	ENSG00000103335	7.52702459021475e-87	1.7283	0.231	0.056	2.73968641034636e-82	PIEZO1
1484	ENSG00000226953	7.77511374339262e-87	1.94082	0.168	0.03	2.82998590032005e-82	NCKAP5-AS2
1485	ENSG00000186814	9.02094669701079e-87	0.807926	0.493	0.188	3.28344417877799e-82	ZSCAN30
1486	ENSG00000119866	1.02097390264637e-86	-5.67991	0.011	0.301	3.71614081085227e-82	BCL11A
1487	ENSG00000080824	1.10380959451163e-86	-0.874239	0.915	0.9	4.01764616210344e-82	HSP90AA1
1488	ENSG00000204685	1.42864320560893e-86	1.10127	0.345	0.11	5.19997553977538e-82	STARD7-AS1
1489	ENSG00000163297	1.96894605600049e-86	0.478802	0.848	0.443	7.1665698546306e-82	ANTXR2
1490	ENSG00000067113	2.57875194816063e-86	0.661403	0.806	0.415	9.38614134091506e-82	PLPP1
1491	ENSG00000153187	2.95674056072587e-86	-1.31108	0.708	0.738	1.076194429293e-81	HNRNPU
1492	ENSG00000147996	3.01555537805739e-86	0.765563	0.6	0.25	1.09760184650533e-81	ZNG1E
1493	ENSG00000086300	3.2376125629212e-86	2.29585	0.159	0.028	1.17842622065206e-81	SNX10
1494	ENSG00000258561	3.3471148227013e-86	0.992166	0.389	0.135	1.21828285316682e-81
1495	ENSG00000102753	4.19304675352953e-86	0.661223	0.939	0.565	1.52618515734968e-81	KPNA3
1496	ENSG00000088808	4.30131352669161e-86	0.684713	0.686	0.314	1.56559209744521e-81	PPP1R13B
1497	ENSG00000102189	4.43197095000152e-86	0.689755	0.869	0.486	1.61314878638155e-81	EEA1
1498	ENSG00000150867	4.49601444756213e-86	0.783654	0.395	0.135	1.63645933862366e-81	PIP4K2A
1499	ENSG00000136152	4.55621163446242e-86	0.740189	0.629	0.275	1.65836991071163e-81	COG3
1500	ENSG00000260922	5.95126916779413e-86	0.847267	0.377	0.126	2.16614295169371e-81
1501	ENSG00000253573	6.49889808362591e-86	2.64709	0.13	0.018	2.36546892447816e-81
1502	ENSG00000117758	7.31042200812974e-86	0.782846	0.635	0.286	2.66084740251906e-81	STX12
1503	ENSG00000184619	7.38181431328096e-86	0.790397	0.606	0.26	2.686832773748e-81	KRBA2
1504	ENSG00000101849	7.80574552348792e-86	0.696116	0.863	0.489	2.84113525563913e-81	TBL1X
1505	ENSG00000280870	8.10736835029601e-86	0.481474	0.803	0.404	2.95091993214074e-81	MIR325HG
1506	ENSG00000053254	1.32695216543469e-85	-4.31107	0.057	0.349	4.82984049174919e-81	FOXN3
1507	ENSG00000198053	1.80384120124029e-85	2.02439	0.202	0.045	6.56562120427443e-81	SIRPA
1508	ENSG00000187446	2.21973521234182e-85	1.42374	0.284	0.082	8.07939222588175e-81	CHP1
1509	ENSG00000171444	2.68663148480086e-85	-0.712958	0.996	0.928	9.77880127837816e-81	MCC
1510	ENSG00000047634	3.52678132423576e-85	0.942631	0.437	0.162	1.28367786639533e-80	SCML1
1511	ENSG00000099992	3.55145657414404e-85	1.70317	0.233	0.058	1.29265916385695e-80	TBC1D10A
1512	ENSG00000233478	4.95311209645155e-85	2.67676	0.12	0.015	1.80283374086644e-80
1513	ENSG00000075539	5.73567908790328e-85	0.495077	0.99	0.845	2.08767247441504e-80	FRYL
1514	ENSG00000198399	6.31399090368433e-85	0.644406	0.711	0.331	2.29816640912302e-80	ITSN2
1515	ENSG00000273172	7.16805504239914e-85	2.79758	0.103	0.01	2.60902867433244e-80	LINC02091
1516	ENSG00000160613	8.59931491280852e-85	0.786577	0.545	0.221	3.12997864196405e-80	PCSK7
1517	ENSG00000270344	9.34097471730261e-85	1.04239	0.296	0.085	3.3999279776038e-80	POC1B-AS1
1518	ENSG00000139438	9.40616475042158e-85	0.767673	0.562	0.235	3.42365584585845e-80	FAM222A
1519	ENSG00000123636	1.11864599051251e-84	-0.625036	1	0.985	4.07164767626745e-80	BAZ2B
1520	ENSG00000236432	1.29276314108127e-84	1.58418	0.293	0.088	4.70539928090761e-80	MFF-DT
1521	ENSG00000188580	1.90112613300831e-84	1.0592	0.239	0.06	6.91971889892363e-80	NKAIN2
1522	ENSG00000249364	1.90130161867027e-84	0.884398	0.762	0.425	6.92035763163603e-80	LINC02997
1523	ENSG00000123191	1.93195973178777e-84	0.796176	0.414	0.146	7.03194703176112e-80	ATP7B
1524	ENSG00000164542	2.47623620572789e-84	0.788277	0.611	0.268	9.01300454160839e-80	MATCAP2
1525	ENSG00000126217	3.55959215933279e-84	0.687538	0.849	0.472	1.29562035415395e-79	MCF2L
1526	ENSG00000234156	3.77263904778322e-84	2.38536	0.107	0.011	1.37316516061214e-79
1527	ENSG00000144224	4.55134127909757e-84	-0.862394	0.934	0.883	1.65659719876593e-79	UBXN4
1528	ENSG00000140937	6.56231245382051e-84	-4.39456	0.058	0.347	2.38855048694159e-79	CDH11
1529	ENSG00000175130	9.29861614886478e-84	-2.58702	0.208	0.47	3.3845103058638e-79	MARCKSL1
1530	ENSG00000101745	1.00394804565247e-83	0.50466	0.994	0.848	3.65417009656585e-79	ANKRD12
1531	ENSG00000272894	1.32501297656551e-83	2.11714	0.156	0.027	4.82278223210313e-79	MIOS-DT
1532	ENSG00000117859	1.35374196401726e-83	0.665588	0.887	0.53	4.92735000063001e-79	OSBPL9
1533	ENSG00000111859	1.55024955813369e-83	0.942708	0.369	0.125	5.64259834169501e-79	NEDD9
1534	ENSG00000108641	1.96267453471105e-83	0.820879	0.455	0.171	7.14374277144127e-79	B9D1
1535	ENSG00000103021	2.70844678531944e-83	1.6483	0.202	0.045	9.85820460920569e-79	CCDC113
1536	ENSG00000163354	2.77069579719272e-83	4.36192	0.07	0.003	1.00847785626221e-78	DCST2
1537	ENSG00000224795	3.23201915000023e-83	1.26712	0.298	0.09	1.17639033021708e-78	NTM-AS1
1538	ENSG00000172985	3.51318592076066e-83	2.91542	0.099	0.01	1.27872941143846e-78	SH3RF3
1539	ENSG00000144824	3.61110977073035e-83	-2.83236	0.181	0.456	1.31437173435043e-78	PHLDB2
1540	ENSG00000131507	4.30448351748334e-83	0.625195	0.922	0.555	1.56674591069359e-78	NDFIP1
1541	ENSG00000262075	4.8716734653196e-83	2.61079	0.128	0.018	1.77319170790703e-78	DKFZP434A062
1542	ENSG00000164070	5.64407441628111e-83	0.783276	0.504	0.201	2.054330206038e-78	HSPA4L
1543	ENSG00000156787	5.70451102032272e-83	1.0769	0.342	0.111	2.07632792117706e-78	TBC1D31
1544	ENSG00000152359	5.82102887086174e-83	1.05263	0.341	0.11	2.11873808841626e-78	POC5
1545	ENSG00000099331	6.73765661926444e-83	0.657567	0.915	0.541	2.45237225627987e-78	MYO9B
1546	ENSG00000104341	7.89800300807142e-83	0.634923	0.929	0.542	2.87471513487783e-78	LAPTM4B
1547	ENSG00000175874	9.3170742382728e-83	3.08153	0.101	0.01	3.39122868124653e-78	CREG2
1548	ENSG00000284624	9.92763539926682e-83	0.731709	0.689	0.33	3.61346073262514e-78
1549	ENSG00000115756	1.00838420311611e-82	1.20903	0.319	0.1	3.67031682250203e-78	HPCAL1
1550	ENSG00000070366	1.29741075835121e-82	0.66279	0.784	0.407	4.72231567824673e-78	SMG6
1551	ENSG00000182158	1.59635907717001e-82	0.830834	0.399	0.14	5.81042776908339e-78	CREB3L2
1552	ENSG00000174483	1.95694509200565e-82	0.877253	0.509	0.206	7.12288874588217e-78	BBS1
1553	ENSG00000112249	2.092843292243e-82	0.586903	0.811	0.412	7.61753101510609e-78	ASCC3
1554	ENSG00000244198	2.38030622930608e-82	1.79244	0.191	0.041	8.66383861342828e-78	ARHGEF35-AS1
1555	ENSG00000111912	3.15362688577608e-82	0.904325	0.345	0.112	1.14785711388478e-77	NCOA7
1556	ENSG00000281196	4.98432460977498e-82	-3.50835	0.069	0.356	1.8141944714659e-77	LINC00934
1557	ENSG00000111670	5.17794077717641e-82	0.729161	0.614	0.268	1.88466688407667e-77	GNPTAB
1558	ENSG00000237705	5.70340137585703e-82	1.70795	0.2	0.045	2.07592403278444e-77
1559	ENSG00000167065	7.13546461497432e-82	0.939934	0.381	0.132	2.59716641055835e-77	DUSP18
1560	ENSG00000085832	1.30634949995007e-81	0.663362	0.744	0.375	4.75485090991825e-77	EPS15
1561	ENSG00000228016	1.63326527052398e-81	2.30424	0.109	0.013	5.94475893165318e-77	RAPGEF4-AS1
1562	ENSG00000100890	1.78164025933597e-81	0.736072	0.481	0.188	6.48481421593108e-77	PRORP
1563	ENSG00000114473	2.04624130371122e-81	0.995047	0.391	0.139	7.4479090972481e-77	IQCG
1564	ENSG00000103365	2.05452980688011e-81	0.699258	0.774	0.397	7.47807759108221e-77	GGA2
1565	ENSG00000074755	2.50382034548319e-81	0.667659	0.833	0.444	9.11340529348971e-77	ZZEF1
1566	ENSG00000229109	2.6305388635032e-81	3.49819	0.093	0.009	9.57463535537894e-77	FRMD3-AS1
1567	ENSG00000164032	2.63467315588286e-81	-1.80549	0.437	0.605	9.58968335278244e-77	H2AZ1
1568	ENSG00000226235	3.00194182945715e-81	2.1389	0.186	0.04	1.09264678708581e-76	LEMD1-AS1
1569	ENSG00000175354	3.12271712836894e-81	0.608468	0.804	0.404	1.13660658038373e-76	PTPN2
1570	ENSG00000137441	3.28837347938726e-81	3.71517	0.08	0.006	1.19690217902738e-76	FGFBP2
1571	ENSG00000247925	3.39863071447457e-81	0.8386	0.457	0.178	1.23703360745445e-76
1572	ENSG00000180233	3.48742339868271e-81	0.644603	0.821	0.429	1.26935236865253e-76	ZNRF2
1573	ENSG00000152402	4.00384936770412e-81	-1.84348	0.764	0.767	1.45732109285695e-76	GUCY1A2
1574	ENSG00000164220	5.87580502825928e-81	2.99343	0.094	0.009	2.13867551418581e-76	F2RL2
1575	ENSG00000248984	7.2061986166257e-81	2.49067	0.141	0.023	2.62291217247942e-76
1576	ENSG00000203585	7.76243092025279e-81	1.60228	0.202	0.046	2.82536960635361e-76	LINC02408
1577	ENSG00000109586	1.00999312202399e-80	-6.12011	0.012	0.287	3.67617296554293e-76	GALNT7
1578	ENSG00000270035	1.20631580824e-80	2.48292	0.116	0.015	4.39074827883195e-76
1579	ENSG00000186088	1.24354165161594e-80	1.63747	0.231	0.06	4.52624290355169e-76	GSAP
1580	ENSG00000227028	1.3715384949867e-80	0.556492	0.904	0.477	4.99212581405257e-76	SLC8A1-AS1
1581	ENSG00000106278	1.63449924826461e-80	-5.33491	0.03	0.307	5.94925036383354e-76	PTPRZ1
1582	ENSG00000169087	1.74745611634034e-80	0.811667	0.405	0.145	6.36039077225557e-76	HSPBAP1
1583	ENSG00000106809	3.3735770849747e-80	1.70321	0.205	0.048	1.22791458738909e-75	OGN
1584	ENSG00000100412	3.40134493821003e-80	0.867697	0.485	0.194	1.23802153060969e-75	ACO2
1585	ENSG00000120658	4.76194005728497e-80	1.5036	0.217	0.053	1.73325094205058e-75	ENOX1
1586	ENSG00000213047	4.80434010232208e-80	-1.35635	0.698	0.755	1.74868371044319e-75	DENND1B
1587	ENSG00000286688	5.63079399297039e-80	1.56179	0.227	0.058	2.04949639756136e-75
1588	ENSG00000265491	5.74036745686195e-80	0.625551	0.823	0.434	2.08937894694861e-75	RNF115
1589	ENSG00000145555	6.6766541345698e-80	0.584722	0.978	0.717	2.43016857190072e-75	MYO10
1590	ENSG00000232284	7.68212609766628e-80	3.47489	0.09	0.008	2.79614025702857e-75	GNG12-AS1
1591	ENSG00000151689	1.12758853244657e-79	1.46851	0.23	0.059	4.10419674039901e-75	INPP1
1592	ENSG00000285636	1.16354441246501e-79	2.36792	0.143	0.024	4.23506895249014e-75
1593	ENSG00000155966	2.36266469722696e-79	0.511019	0.988	0.671	8.59962696496669e-75	AFF2
1594	ENSG00000235914	2.41365932568002e-79	1.45755	0.232	0.06	8.78523721361013e-75	MACROD2-AS1
1595	ENSG00000090661	2.4450574119685e-79	0.776459	0.613	0.278	8.89951996808296e-75	CERS4
1596	ENSG00000138741	5.27460992118745e-79	3.20663	0.084	0.007	1.91985251911381e-74	TRPC3
1597	ENSG00000117245	5.92823159694012e-79	2.60904	0.124	0.018	2.15775773665427e-74	KIF17
1598	ENSG00000198763	6.19348992880903e-79	-1.83288	0.416	0.621	2.25430646428791e-74	MT-ND2
1599	ENSG00000100523	6.48885762486369e-79	0.593243	0.899	0.513	2.36181439829789e-74	DDHD1
1600	ENSG00000060709	6.87577582595807e-79	0.561933	0.931	0.513	2.50264488513222e-74	RIMBP2
1601	ENSG00000161016	7.54988360603048e-79	-1.62484	0.562	0.659	2.74800663492298e-74	RPL8
1602	ENSG00000178796	7.9013463717742e-79	1.8158	0.186	0.04	2.87593205239837e-74	RIIAD1
1603	ENSG00000163913	9.36049491463912e-79	0.80194	0.48	0.191	3.40703293903035e-74	IFT122
1604	ENSG00000188687	1.00071787319619e-78	0.743878	0.453	0.174	3.6424129148595e-74	SLC4A5
1605	ENSG00000226484	1.25635961908648e-78	2.57947	0.099	0.011	4.57289774155095e-74
1606	ENSG00000137073	1.36997536199214e-78	0.669289	0.835	0.461	4.986436322579e-74	UBAP2
1607	ENSG00000250159	1.43489806495494e-78	0.855861	0.396	0.144	5.22274197682298e-74	PKD2L2-DT
1608	ENSG00000274605	1.4441800771426e-78	1.55759	0.199	0.046	5.25652664478365e-74	PCCA-DT
1609	ENSG00000075624	1.45140242759298e-78	-1.94618	0.402	0.579	5.28281455595291e-74	ACTB
1610	ENSG00000171817	1.74922392200676e-78	0.6563	0.602	0.262	6.36682523132022e-74	ZNF540
1611	ENSG00000170522	1.81335198142486e-78	0.719075	0.65	0.31	6.6002385419902e-74	ELOVL6
1612	ENSG00000257298	1.82195335733687e-78	2.97834	0.105	0.012	6.63154583003473e-74
1613	ENSG00000112685	1.94136880169082e-78	0.606867	0.692	0.324	7.06619416439426e-74	EXOC2
1614	ENSG00000047617	2.35932363979076e-78	0.501517	1	0.806	8.58746618411043e-74	ANO2
1615	ENSG00000261346	2.43889890003976e-78	3.42382	0.084	0.007	8.8771042163647e-74
1616	ENSG00000171843	2.82383581908032e-78	1.58161	0.193	0.043	1.02781976142886e-73	MLLT3
1617	ENSG00000153721	3.19288862891495e-78	3.03709	0.092	0.009	1.16214760315246e-73	CNKSR3
1618	ENSG00000126106	3.40969434924033e-78	1.21518	0.308	0.098	1.2410605492365e-73	TMEM53
1619	ENSG00000122550	4.16299011410442e-78	0.622072	0.774	0.4	1.51524514173173e-73	KLHL7
1620	ENSG00000159445	5.25899295045225e-78	0.661365	0.592	0.255	1.91416825410561e-73	THEM4
1621	ENSG00000136021	6.44027474588821e-78	0.607474	0.752	0.375	2.34413120200839e-73	SCYL2
1622	ENSG00000165868	6.56562605876805e-78	0.624305	0.658	0.3	2.38975657287039e-73	HSPA12A
1623	ENSG00000051825	6.67813540695632e-78	0.690771	0.793	0.409	2.43070772542396e-73	MPHOSPH9
1624	ENSG00000065135	6.96363729498761e-78	0.711198	0.806	0.446	2.53462470262959e-73	GNAI3
1625	ENSG00000116984	7.81036403612802e-78	0.673927	0.552	0.236	2.84281630186988e-73	MTR
1626	ENSG00000258472	7.83537832797686e-78	1.27202	0.225	0.057	2.85192100381702e-73
1627	ENSG00000187634	1.06679956649734e-77	-4.27871	0.045	0.317	3.88293706213702e-73	SAMD11
1628	ENSG00000213889	1.52762429649074e-77	1.86829	0.132	0.021	5.56024691436699e-73	PPM1N
1629	ENSG00000006125	1.79033798312531e-77	0.634142	0.853	0.471	6.5164721909795e-73	AP2B1
1630	ENSG00000151576	2.07252679705739e-77	0.721378	0.606	0.273	7.54358303592947e-73	QTRT2
1631	ENSG00000205922	2.14960414216813e-77	-7.29746	0.004	0.267	7.82412915666357e-73	ONECUT3
1632	ENSG00000139767	2.17982910070646e-77	-0.590155	0.997	0.971	7.93414196075138e-73	SRRM4
1633	ENSG00000054654	2.22729223525014e-77	-1.7288	0.466	0.632	8.10689827786344e-73	SYNE2
1634	ENSG00000100024	2.35136468020638e-77	1.54032	0.255	0.073	8.55849716301516e-73	UPB1
1635	ENSG00000197535	2.57449429242276e-77	0.603154	0.911	0.572	9.37064432556038e-73	MYO5A
1636	ENSG00000089091	2.91548113078415e-77	0.65987	0.592	0.258	1.06117682198282e-72	DZANK1
1637	ENSG00000196776	4.48807204985606e-77	0.751916	0.665	0.314	1.63356846470661e-72	CD47
1638	ENSG00000175895	5.45444299877672e-77	1.63739	0.21	0.052	1.98530816269475e-72	PLEKHF2
1639	ENSG00000118515	6.04579643526027e-77	1.45611	0.222	0.056	2.20054898650603e-72	SGK1
1640	ENSG00000153936	6.78404364983141e-77	0.543168	0.949	0.594	2.46925620766564e-72	HS2ST1
1641	ENSG00000163617	6.88212996674523e-77	0.680396	0.572	0.252	2.50495766529593e-72	CCDC191
1642	ENSG00000177311	7.11152715760252e-77	0.85864	0.488	0.2	2.58845365482417e-72	ZBTB38
1643	ENSG00000079335	7.90020055205781e-77	0.715283	0.555	0.241	2.875514996938e-72	CDC14A
1644	ENSG00000130559	9.74960975977123e-77	0.609891	0.947	0.596	3.54866296036153e-72	CAMSAP1
1645	ENSG00000243295	1.00854627071911e-76	2.1147	0.158	0.031	3.67090671616342e-72	CFAP20DC-DT
1646	ENSG00000235984	1.06234702793094e-76	1.56539	0.26	0.076	3.86673071226302e-72	GPC5-AS1
1647	ENSG00000232328	1.23396130036669e-76	3.34554	0.088	0.008	4.49137234107468e-72
1648	ENSG00000096092	1.48078519737425e-76	1.00946	0.349	0.12	5.38976196140281e-72	TMEM14A
1649	ENSG00000275139	1.93962839911429e-76	1.62354	0.186	0.041	7.0598594470962e-72
1650	ENSG00000154118	2.32544731397379e-76	1.0179	0.344	0.117	8.46416313340179e-72	JPH3
1651	ENSG00000112137	2.49189803247168e-76	-3.51529	0.111	0.379	9.07001045859044e-72	PHACTR1
1652	ENSG00000137766	3.89473150366426e-76	-5.25211	0.036	0.302	1.41760437270372e-71	UNC13C
1653	ENSG00000119772	4.4428350220967e-76	0.642516	0.845	0.47	1.61710309134276e-71	DNMT3A
1654	ENSG00000232120	5.14729213272756e-76	1.35262	0.247	0.069	1.87351139047018e-71
1655	ENSG00000063127	5.22773701584601e-76	1.26367	0.189	0.042	1.90279171902763e-71	SLC6A16
1656	ENSG00000144040	5.34335833986834e-76	1.00033	0.285	0.087	1.94487556854528e-71	SFXN5
1657	ENSG00000138028	6.94450944525202e-76	2.11848	0.155	0.03	2.52766254788283e-71	CGREF1
1658	ENSG00000165555	6.99907957283272e-76	1.23073	0.243	0.066	2.54752498291965e-71	NOXRED1
1659	ENSG00000136960	7.4175776834902e-76	3.41552	0.089	0.009	2.69984992523676e-71	ENPP2
1660	ENSG00000064115	7.61485919256364e-76	0.672998	0.692	0.33	2.77165644890932e-71	TM7SF3
1661	ENSG00000053747	7.89945047273669e-76	2.64291	0.092	0.009	2.8752419830667e-71	LAMA3
1662	ENSG00000070610	1.01411732146386e-75	0.923765	0.359	0.124	3.69118422666416e-71	GBA2
1663	ENSG00000166598	1.22350005809884e-75	-1.8776	0.392	0.582	4.45329551146816e-71	HSP90B1
1664	ENSG00000154319	1.65231737471124e-75	3.45719	0.085	0.008	6.01410478047396e-71	FAM167A
1665	ENSG00000150764	1.77885195444258e-75	0.599147	0.855	0.479	6.4746653437801e-71	DIXDC1
1666	ENSG00000233723	1.86967392753506e-75	-2.68875	0.253	0.491	6.80523916144212e-71	LINC01122
1667	ENSG00000168096	2.03393617924382e-75	0.746544	0.499	0.206	7.40312090521164e-71	ANKS3
1668	ENSG00000241697	2.26935723504502e-75	-2.93672	0.112	0.38	8.26000646411685e-71	TMEFF1
1669	ENSG00000163867	2.38934117286614e-75	0.764897	0.489	0.201	8.69672400099818e-71	ZMYM6
1670	ENSG00000241343	2.4265460169723e-75	-2.08442	0.351	0.542	8.83214219257579e-71	RPL36A
1671	ENSG00000052795	2.47492313559282e-75	0.572357	0.684	0.322	9.00822522893074e-71	FNIP2
1672	ENSG00000162337	2.76756456501774e-75	-3.54151	0.081	0.347	1.00733815037516e-70	LRP5
1673	ENSG00000152763	3.04610267863178e-75	0.655074	0.543	0.232	1.1087204529684e-70	DNAI4
1674	ENSG00000158006	3.61305491295375e-75	1.04456	0.345	0.119	1.31507972721691e-70	PAFAH2
1675	ENSG00000176788	4.34667899486287e-75	-2.02149	0.345	0.558	1.58210422055019e-70	BASP1
1676	ENSG00000260641	4.61155396311084e-75	2.41287	0.107	0.014	1.67851341149308e-70	TSPAN5-DT
1677	ENSG00000112902	4.84135959966961e-75	-1.86749	0.457	0.643	1.76215806708775e-70	SEMA5A
1678	ENSG00000287877	4.99002434929784e-75	4.04671	0.068	0.004	1.81626906265743e-70
1679	ENSG00000267575	6.44071274371853e-75	1.13467	0.311	0.101	2.34429062445867e-70	LINC02987
1680	ENSG00000168118	8.45721319271462e-75	0.757345	0.472	0.188	3.07825645788427e-70	RAB4A
1681	ENSG00000240291	1.19174689240173e-74	0.607441	0.567	0.246	4.33772033896383e-70
1682	ENSG00000219665	1.31658275585528e-74	0.738203	0.461	0.185	4.79209791476205e-70	ZNF433-AS1
1683	ENSG00000139537	1.4000586734172e-74	1.06324	0.337	0.116	5.09593355950392e-70	CCDC65
1684	ENSG00000254263	1.48227279851052e-74	1.33896	0.231	0.062	5.39517653201858e-70
1685	ENSG00000134690	1.70970325408088e-74	1.76151	0.165	0.034	6.22297790420357e-70	CDCA8
1686	ENSG00000156831	2.00796950483089e-74	0.519785	0.896	0.507	7.30860740368346e-70	NSMCE2
1687	ENSG00000227355	2.05620720226791e-74	2.35018	0.129	0.021	7.48418297481475e-70
1688	ENSG00000180190	2.13574692363004e-74	0.75125	0.489	0.201	7.77369165262862e-70	TDRP
1689	ENSG00000272078	2.3668270109812e-74	0.976365	0.333	0.112	8.61477695456938e-70
1690	ENSG00000152154	2.95657730715092e-74	1.35489	0.197	0.047	1.07613500825679e-69	TMEM178A
1691	ENSG00000168434	3.36469696547454e-74	0.697559	0.491	0.2	1.22468240149342e-69	COG7
1692	ENSG00000176049	4.47947976970049e-74	-4.66583	0.044	0.305	1.63044104657558e-69	JAKMIP2
1693	ENSG00000233429	4.95086573066067e-74	-5.97385	0.006	0.261	1.80201610864587e-69	HOTAIRM1
1694	ENSG00000238121	5.06880528422569e-74	4.2033	0.068	0.004	1.84494374735247e-69	LINC00426
1695	ENSG00000006116	5.58707269898276e-74	3.08972	0.098	0.011	2.03358272097574e-69	CACNG3
1696	ENSG00000255240	5.70341861537092e-74	1.44715	0.166	0.034	2.07593030762271e-69
1697	ENSG00000140463	5.93621630324859e-74	0.603546	0.726	0.355	2.16066401005642e-69	BBS4
1698	ENSG00000248599	6.7755673006085e-74	4.45907	0.059	0.002	2.46617098607548e-69	FLJ42969
1699	ENSG00000271913	7.38351077799912e-74	0.720445	0.541	0.236	2.68745025297612e-69	TAGAP-AS1
1700	ENSG00000236453	1.0010148450532e-73	5.45195	0.054	0.002	3.64349383302463e-69
1701	ENSG00000148180	1.1816881249696e-73	2.25242	0.115	0.016	4.30110843726434e-69	GSN
1702	ENSG00000119471	1.24274308411759e-73	0.814674	0.355	0.126	4.52333627757121e-69	HSDL2
1703	ENSG00000078237	1.33824101233354e-73	0.590388	0.703	0.342	4.87092963669161e-69	TIGAR
1704	ENSG00000236437	1.37878208799206e-73	2.22351	0.125	0.019	5.0184910438735e-69	LINC02151
1705	ENSG00000084710	1.44060472115187e-73	0.998649	0.378	0.142	5.24351306404857e-69	EFR3B
1706	ENSG00000138735	1.68617614880725e-73	0.574095	0.84	0.456	6.13734394642863e-69	PDE5A
1707	ENSG00000244137	1.7921705903353e-73	1.53832	0.224	0.06	6.52314251470241e-69
1708	ENSG00000130822	2.05363524015759e-73	0.708035	0.607	0.281	7.47482154712561e-69	PNCK
1709	ENSG00000250990	2.15966902040398e-73	2.29316	0.124	0.019	7.86076330046642e-69
1710	ENSG00000287636	2.42564645589254e-73	1.28665	0.235	0.065	8.82886797015768e-69
1711	ENSG00000253925	2.59108885459917e-73	1.97373	0.176	0.039	9.43104521297005e-69
1712	ENSG00000182329	4.43833041118114e-73	2.17451	0.132	0.022	1.61546350306171e-68	KIAA2012
1713	ENSG00000105438	4.7497619212087e-73	-2.34212	0.252	0.479	1.72881834408154e-68	KDELR1
1714	ENSG00000223572	5.00491245447846e-73	1.9418	0.187	0.044	1.82168803518107e-68	CKMT1A
1715	ENSG00000223572	5.00491245447846e-73	1.9418	0.187	0.044	1.82168803518107e-68	CKMT1A
1716	ENSG00000073792	5.1002447310604e-73	-0.857331	0.926	0.893	1.85638707721136e-68	IGF2BP2
1717	ENSG00000232079	5.97418792285036e-73	-4.63724	0.024	0.281	2.17448492015907e-68	LINC01697
1718	ENSG00000167196	6.15222600249705e-73	0.665573	0.592	0.269	2.23928722038888e-68	FBXO22
1719	ENSG00000149231	6.8270390294396e-73	0.602526	0.842	0.458	2.48490566593542e-68	CCDC82
1720	ENSG00000154175	7.65621117500579e-73	1.66307	0.209	0.054	2.78670774347861e-68	ABI3BP
1721	ENSG00000213809	8.18440061642217e-73	5.9538	0.048	0.001	2.97895813636534e-68	KLRK1
1722	ENSG00000213809	8.18440061642217e-73	5.9538	0.048	0.001	2.97895813636534e-68	KLRK1
1723	ENSG00000058063	8.20900642516944e-73	0.575201	0.836	0.464	2.98791415863317e-68	ATP11B
1724	ENSG00000104611	8.45536216047043e-73	3.34997	0.092	0.01	3.07758271916803e-68	SH2D4A
1725	ENSG00000132563	9.25465004257049e-73	0.808524	0.399	0.148	3.36850752249481e-68	REEP2
1726	ENSG00000121988	1.40899845539403e-72	0.56825	0.773	0.402	5.12847257794321e-68	ZRANB3
1727	ENSG00000149927	1.58891932157193e-72	1.85218	0.153	0.03	5.7833485466575e-68	DOC2A
1728	ENSG00000146802	1.6634511880423e-72	0.580443	0.578	0.253	6.05462963423636e-68	TMEM168
1729	ENSG00000273079	1.67509109542329e-72	2.46364	0.107	0.014	6.09699656912168e-68	GRIN2B
1730	ENSG00000188613	1.82338216786211e-72	1.75405	0.172	0.037	6.63674641458452e-68	NANOS1
1731	ENSG00000188352	2.05616579969102e-72	0.503087	0.791	0.411	7.48403227771538e-68	FOCAD
1732	ENSG00000151491	2.50277569648327e-72	0.399762	0.991	0.652	9.10960298005981e-68	EPS8
1733	ENSG00000050426	2.55394372150441e-72	0.76121	0.44	0.173	9.29584435753177e-68	LETMD1
1734	ENSG00000206560	2.64384392007982e-72	0.505648	0.947	0.643	9.62306310030654e-68	ANKRD28
1735	ENSG00000196230	2.97757059239106e-72	-2.27023	0.262	0.485	1.0837761442185e-67	TUBB
1736	ENSG00000146267	3.16315688989014e-72	0.794764	0.406	0.155	1.15132584478221e-67	FAXC
1737	ENSG00000158201	3.18037185875181e-72	0.938198	0.364	0.134	1.15759174914848e-67	ABHD3
1738	ENSG00000184207	3.33604315401906e-72	0.684676	0.476	0.193	1.21425298719986e-67	PGP
1739	ENSG00000155275	4.36046660385939e-72	0.907657	0.381	0.141	1.58712263447274e-67	TRMT44
1740	ENSG00000070159	4.63175391681781e-72	2.86933	0.104	0.013	1.68586579064334e-67	PTPN3
1741	ENSG00000168803	4.77559604731918e-72	1.14783	0.262	0.079	1.73822144930324e-67	ADAL
1742	ENSG00000259564	5.30742172544752e-72	0.799478	0.377	0.138	1.93179535962839e-67
1743	ENSG00000255580	5.41876556315342e-72	0.56335	0.717	0.346	1.97232228967658e-67
1744	ENSG00000224848	5.5690028449534e-72	0.933713	0.396	0.153	2.02700565550614e-67
1745	ENSG00000205542	5.76841082818175e-72	-1.83267	0.37	0.558	2.09958617324159e-67	TMSB4X
1746	ENSG00000048740	7.39230222006125e-72	0.416846	0.989	0.797	2.6906501620579e-67	CELF2
1747	ENSG00000138279	8.0308008093024e-72	0.83705	0.411	0.159	2.92305087856989e-67	ANXA7
1748	ENSG00000135457	8.13847889650551e-72	0.546261	0.786	0.408	2.96224354875007e-67	TFCP2
1749	ENSG00000006432	8.17937057569535e-72	1.05857	0.318	0.108	2.97712730214159e-67	MAP3K9
1750	ENSG00000188452	9.04715400412659e-72	-1.46853	0.814	0.797	3.292983114422e-67	CERKL
1751	ENSG00000152939	9.57782203876123e-72	3.01023	0.089	0.009	3.48613566566831e-67	MARVELD2
1752	ENSG00000258378	9.66270363707465e-72	0.996528	0.333	0.116	3.51703086982243e-67
1753	ENSG00000166153	1.17727590978437e-71	1.26876	0.261	0.079	4.28504885643316e-67	DEPDC4
1754	ENSG00000167658	1.344383393682e-71	-2.33322	0.25	0.473	4.89328667632373e-67	EEF2
1755	ENSG00000162687	1.36184950445459e-71	-1.15127	0.884	0.845	4.95685982631381e-67	KCNT2
1756	ENSG00000287242	1.37254850249758e-71	2.2374	0.13	0.022	4.99580203939067e-67
1757	ENSG00000153832	1.43284439385287e-71	0.80514	0.447	0.182	5.21526702474566e-67	FBXO36
1758	ENSG00000204815	1.47123374418739e-71	1.0175	0.342	0.121	5.35499658209327e-67	ODAD4
1759	ENSG00000163492	1.48573534414028e-71	-2.3425	0.298	0.513	5.40777950560181e-67	CCDC141
1760	ENSG00000102271	1.50112240714096e-71	0.495737	0.545	0.238	5.46378533751168e-67	KLHL4
1761	ENSG00000155974	1.81664133253453e-71	-0.920452	0.974	0.928	6.61221112215918e-67	GRIP1
1762	ENSG00000067225	2.14985195613614e-71	0.510065	0.902	0.538	7.82503114994434e-67	PKM
1763	ENSG00000138744	2.27827216199434e-71	1.98133	0.148	0.029	8.29245501522699e-67	NAAA
1764	ENSG00000250888	2.3360432221394e-71	5.2424	0.049	0.001	8.50273011994298e-67	LINC01455
1765	ENSG00000272341	2.58711500108212e-71	3.18435	0.077	0.006	9.41658118093871e-67
1766	ENSG00000214050	2.85718461573761e-71	0.591493	0.596	0.269	1.03995805643617e-66	FBXO16
1767	ENSG00000105953	2.93004758711905e-71	0.642935	0.718	0.364	1.06647872075959e-66	OGDH
1768	ENSG00000129003	3.1443115853461e-71	0.513761	0.965	0.693	1.14446653083427e-66	VPS13C
1769	ENSG00000072657	3.51947326326656e-71	-2.27188	0.288	0.513	1.28101787836376e-66	TRHDE
1770	ENSG00000123130	4.46098492231371e-71	1.74664	0.181	0.042	1.62370929202374e-66	ACOT9
1771	ENSG00000144029	4.62369997737356e-71	0.6275	0.639	0.297	1.68293431776443e-66	MRPS5
1772	ENSG00000136297	6.85588317094064e-71	0.564358	0.89	0.514	2.49540435655897e-66	MMD2
1773	ENSG00000153814	7.02558291783399e-71	0.351537	0.777	0.376	2.55717167043322e-66	JAZF1
1774	ENSG00000260947	7.75856205082713e-71	2.01318	0.142	0.027	2.82396141526006e-66
1775	ENSG00000165006	8.39410841240343e-71	0.558949	0.778	0.414	3.0552875799466e-66	UBAP1
1776	ENSG00000149948	9.66353782611272e-71	-3.55043	0.082	0.345	3.51733449794851e-66	HMGA2
1777	ENSG00000119401	1.23352353929367e-70	1.57326	0.191	0.046	4.48977897832108e-66	TRIM32
1778	ENSG00000151490	1.25345950047962e-70	-2.19723	0.274	0.506	4.56234188984571e-66	PTPRO
1779	ENSG00000231107	1.322819739252e-70	0.930373	0.512	0.236	4.81479928692943e-66	LINC01508
1780	ENSG00000111664	1.45098105455361e-70	0.538403	0.949	0.571	5.28128084236423e-66	GNB3
1781	ENSG00000249464	1.46175394731714e-70	3.1588	0.088	0.009	5.32049201744491e-66	LINC01091
1782	ENSG00000107902	1.58892052814165e-70	1.15098	0.261	0.079	5.78335293832998e-66	LHPP
1783	ENSG00000131730	1.83527951888396e-70	1.09311	0.247	0.071	6.68005039283384e-66	CKMT2
1784	ENSG00000099139	2.07533134799681e-70	-1.734	0.473	0.612	7.5537910404388e-66	PCSK5
1785	ENSG00000137942	2.1531789002464e-70	-1.20608	0.688	0.735	7.83714056111684e-66	FNBP1L
1786	ENSG00000108556	2.17809982473385e-70	1.74413	0.153	0.031	7.92784774206626e-66	CHRNE
1787	ENSG00000039523	2.23043208469259e-70	0.867897	0.38	0.143	8.1183267018641e-66	RIPOR1
1788	ENSG00000184831	2.42535488455225e-70	0.795486	0.436	0.174	8.82780670879327e-66	APOO
1789	ENSG00000135317	2.5763167326451e-70	0.511258	0.835	0.45	9.37727764348162e-66	SNX14
1790	ENSG00000183621	2.66181046831703e-70	0.572083	0.75	0.389	9.68845774258032e-66	ZNF438
1791	ENSG00000167037	2.81859586211531e-70	1.4462	0.203	0.052	1.02591252189273e-65	SGSM1
1792	ENSG00000171503	3.32817294435143e-70	0.58632	0.61	0.28	1.21138838828504e-65	ETFDH
1793	ENSG00000071082	3.60746914408601e-70	-1.54539	0.551	0.645	1.31304661906443e-65	RPL31
1794	ENSG00000138780	3.89499005438474e-70	0.543003	0.801	0.437	1.41769847999496e-65	GSTCD
1795	ENSG00000132463	4.02059164824189e-70	0.666264	0.605	0.276	1.46341494812708e-65	GRSF1
1796	ENSG00000273018	4.39669482850034e-70	0.882681	0.387	0.148	1.60030898367755e-65	FAM106A
1797	ENSG00000095380	4.83552392065232e-70	1.44421	0.196	0.049	1.76003399663903e-65	NANS
1798	ENSG00000119685	5.12891942873745e-70	0.579648	0.926	0.59	1.86682409367186e-65	TTLL5
1799	ENSG00000101350	5.40497697836658e-70	0.65048	0.65	0.319	1.96730352058587e-65	KIF3B
1800	ENSG00000224613	6.63283878145923e-70	2.15691	0.125	0.021	2.41422065967553e-65	RNPC3-DT
1801	ENSG00000116514	6.75141526361735e-70	1.09937	0.272	0.085	2.45738012765144e-65	RNF19B
1802	ENSG00000226320	7.21937193678294e-70	1.82291	0.152	0.031	2.62770699755026e-65	LINC01811
1803	ENSG00000162129	7.30306187703093e-70	0.815512	0.415	0.163	2.65816846200172e-65	CLPB
1804	ENSG00000162877	7.32719342634152e-70	2.90019	0.105	0.014	2.66695186331979e-65	PM20D1
1805	ENSG00000101966	7.34328047417108e-70	0.659943	0.591	0.271	2.67280722698879e-65	XIAP
1806	ENSG00000203809	9.09990359395541e-70	2.02101	0.138	0.026	3.31218291012789e-65	LIN28B-AS1
1807	ENSG00000104361	9.13361165259731e-70	0.571717	0.73	0.371	3.32445196931237e-65	NIPAL2
1808	ENSG00000245768	9.22737666978839e-70	1.87947	0.123	0.02	3.35858056026958e-65
1809	ENSG00000287836	9.70482260484006e-70	3.37948	0.077	0.007	3.53236133170969e-65
1810	ENSG00000166527	1.17550875865024e-69	3.24176	0.078	0.007	4.27861677973515e-65	CLEC4D
1811	ENSG00000175115	1.37215369478619e-69	0.545231	0.895	0.526	4.99436501828279e-65	PACS1
1812	ENSG00000267000	1.47440025756072e-69	3.89188	0.061	0.003	5.36652205746949e-65
1813	ENSG00000072609	1.54195859182208e-69	0.664692	0.496	0.208	5.61242088251402e-65	CHFR
1814	ENSG00000226207	1.54639052828939e-69	4.4607	0.057	0.003	5.62855224486771e-65
1815	ENSG00000198625	1.84787254850993e-69	0.576668	0.906	0.568	6.72588650206644e-65	MDM4
1816	ENSG00000196372	1.87765782228137e-69	1.33953	0.228	0.064	6.83429894153973e-65	ASB13
1817	ENSG00000269054	2.10423605030538e-69	1.06789	0.235	0.066	7.65899837590153e-65	ZNF497-AS1
1818	ENSG00000138449	2.26826940114232e-69	-1.47599	0.623	0.69	8.25604696627783e-65	SLC40A1
1819	ENSG00000115310	2.4728318448206e-69	-0.939734	0.923	0.863	9.00061334877802e-65	RTN4
1820	ENSG00000172671	3.14430054275694e-69	0.718332	0.499	0.215	1.14446251155267e-64	ZFAND4
1821	ENSG00000234807	3.39963661499527e-69	1.31916	0.214	0.057	1.23739973512598e-64	LINC01135
1822	ENSG00000206113	3.86053213243442e-69	2.65346	0.095	0.012	1.40515648556348e-64	CFAP99
1823	ENSG00000106537	3.9451204756177e-69	0.971289	0.317	0.108	1.43594495071533e-64	TSPAN13
1824	ENSG00000185561	4.63369358644902e-69	3.82817	0.064	0.004	1.68657179159571e-64	TLCD2
1825	ENSG00000189308	6.25919522732429e-69	0.631415	0.565	0.254	2.27822187884149e-64	LIN54
1826	ENSG00000137960	1.07828894204793e-68	1.9214	0.131	0.023	3.92475609126605e-64	GIPC2
1827	ENSG00000165996	1.09745358507861e-68	1.39679	0.199	0.051	3.99451155896912e-64	HACD1
1828	ENSG00000228061	1.1131686538899e-68	0.729306	0.36	0.131	4.05171126642845e-64
1829	ENSG00000106853	1.2301179827608e-68	0.916509	0.403	0.159	4.47738343365274e-64	PTGR1
1830	ENSG00000081181	1.31279225710365e-68	1.24242	0.232	0.066	4.77830125740587e-64	ARG2
1831	ENSG00000125851	1.32401936642481e-68	-7.52717	0.008	0.247	4.81916568991301e-64	PCSK2
1832	ENSG00000134318	1.6258553237005e-68	0.595521	0.93	0.607	5.91778820720509e-64	ROCK2
1833	ENSG00000007168	1.79389035018639e-68	-0.809128	0.925	0.869	6.52940209660841e-64	PAFAH1B1
1834	ENSG00000184608	1.87105772035706e-68	3.32658	0.068	0.005	6.81027589055562e-64	FAM167A-AS1
1835	ENSG00000188878	2.06007978457083e-68	1.43053	0.184	0.044	7.49827839988089e-64	FBF1
1836	ENSG00000136682	2.30502030778164e-68	0.606964	0.666	0.316	8.38981291626361e-64	ZNG1B
1837	ENSG00000157036	2.36771609849612e-68	0.799138	0.407	0.16	8.61801305530618e-64	EXOG
1838	ENSG00000230317	2.64146910504329e-68	2.2233	0.117	0.019	9.61441924853658e-64	LINC01284
1839	ENSG00000142784	2.66475994403997e-68	0.583237	0.645	0.304	9.69919324431669e-64	WDTC1
1840	ENSG00000105954	2.73388975486974e-68	3.22678	0.093	0.011	9.9508119297749e-64	NPVF
1841	ENSG00000175106	2.88171712513641e-68	0.590514	0.714	0.362	1.04888739920715e-63	TVP23C
1842	ENSG00000137845	3.04740991132389e-68	-1.30322	0.755	0.75	1.10919625952367e-63	ADAM10
1843	ENSG00000060762	3.23431522978515e-68	0.819884	0.369	0.137	1.1772260573372e-63	MPC1
1844	ENSG00000247131	3.52153219816307e-68	4.60745	0.048	0.001	1.2817672894874e-63
1845	ENSG00000142655	3.61781621481447e-68	0.579337	0.626	0.299	1.31681274586817e-63	PEX14
1846	ENSG00000196873	4.57767900327425e-68	0.855241	0.39	0.15	1.66618360361176e-63	ZNG1C
1847	ENSG00000182185	5.63287374485678e-68	0.415962	0.739	0.385	2.05025338565297e-63	RAD51B
1848	ENSG00000162073	6.18744659093633e-68	0.864192	0.366	0.136	2.25210681016901e-63	PAQR4
1849	ENSG00000152463	6.199375548607e-68	0.961745	0.413	0.17	2.25644871218198e-63	OLAH
1850	ENSG00000136153	7.57926139540558e-68	0.763561	0.417	0.167	2.75869956269972e-63	LMO7
1851	ENSG00000144810	8.11269026364974e-68	2.53134	0.11	0.017	2.95285700216323e-63	COL8A1
1852	ENSG00000158062	9.38393090783356e-68	1.79614	0.166	0.037	3.41556317183326e-63	UBXN11
1853	ENSG00000196437	9.60995319801934e-68	0.673643	0.488	0.208	3.49783076501508e-63	ZNF569
1854	ENSG00000161813	9.86081251544089e-68	0.576111	0.637	0.299	3.58913853937018e-63	LARP4
1855	ENSG00000170873	1.09533168971688e-67	0.503224	0.958	0.648	3.98678828423151e-63	MTSS1
1856	ENSG00000249797	1.16545570735352e-67	2.10728	0.115	0.018	4.24202568362534e-63	LINC02147
1857	ENSG00000279467	1.1765851271852e-67	2.31185	0.111	0.017	4.28253454592869e-63
1858	ENSG00000231902	1.19648164898489e-67	3.60255	0.068	0.005	4.35495390597519e-63
1859	ENSG00000169684	1.21058740752346e-67	-3.78764	0.118	0.359	4.40629604590389e-63	CHRNA5
1860	ENSG00000179833	1.21485944158362e-67	0.533502	0.643	0.312	4.42184539547606e-63	SERTAD2
1861	ENSG00000049883	1.21597152976932e-67	0.824044	0.338	0.119	4.42589317405438e-63	PTCD2
1862	ENSG00000166167	1.37065503703505e-67	0.500449	0.974	0.731	4.98891020380016e-63	BTRC
1863	ENSG00000197150	1.38315815504864e-67	1.21088	0.253	0.077	5.03441905274603e-63	ABCB8
1864	ENSG00000111880	1.49548674398986e-67	0.529784	0.958	0.667	5.44327265077429e-63	RNGTT
1865	ENSG00000226742	1.54314755776322e-67	1.76372	0.159	0.035	5.61674848074656e-63	HSBP1L1
1866	ENSG00000285639	1.62280448843669e-67	2.36134	0.122	0.021	5.90668377701188e-63
1867	ENSG00000248152	1.65618391237062e-67	0.736309	0.408	0.161	6.02817820424659e-63	ANK2-AS1
1868	ENSG00000205846	2.56665381768445e-67	3.12436	0.081	0.008	9.34210656560788e-63	CLEC6A
1869	ENSG00000106608	2.81723639128334e-67	0.554166	0.635	0.302	1.02541770169931e-62	URGCP
1870	ENSG00000104765	3.52064626575682e-67	-1.68467	0.462	0.598	1.28144482781017e-62	BNIP3L
1871	ENSG00000144935	3.64791824425032e-67	0.550455	0.85	0.497	1.32776928254223e-62	TRPC1
1872	ENSG00000223812	3.87764921651729e-67	2.03234	0.141	0.028	1.41138676182796e-62	PYDC2-AS1
1873	ENSG00000189403	4.30249478491e-67	-1.05593	0.79	0.782	1.56602205181154e-62	HMGB1
1874	ENSG00000137275	4.3757875629093e-67	0.891404	0.339	0.122	1.59269915714773e-62	RIPK1
1875	ENSG00000113645	4.99838198446674e-67	0.468541	0.997	0.801	1.8193110747062e-62	WWC1
1876	ENSG00000205085	5.21490361940383e-67	1.41533	0.202	0.053	1.89812061939061e-62	GARIN1A
1877	ENSG00000104299	5.35143219183283e-67	0.547297	0.602	0.279	1.94781428918331e-62	INTS9
1878	ENSG00000146247	6.18551951968459e-67	-0.740782	0.975	0.913	2.2514053947748e-62	PHIP
1879	ENSG00000103257	6.84713416922713e-67	1.30524	0.209	0.057	2.49221989491529e-62	SLC7A5
1880	ENSG00000173065	7.36408378389526e-67	0.668483	0.741	0.407	2.6803792156622e-62	FAM222B
1881	ENSG00000089876	1.04894460480945e-66	0.56496	0.568	0.259	3.81794857258544e-62	DHX32
1882	ENSG00000146938	1.09089494517829e-66	-5.47552	0.021	0.259	3.97063942145993e-62	NLGN4X
1883	ENSG00000253530	1.15678245589516e-66	2.51583	0.117	0.019	4.21045678296722e-62
1884	ENSG00000273247	1.49403388814921e-66	0.515304	0.678	0.338	5.4379845460855e-62	RAB33B-AS1
1885	ENSG00000244564	1.51011885043672e-66	3.94062	0.06	0.003	5.49653059181959e-62	PRICKLE2-DT
1886	ENSG00000137491	1.53226994947253e-66	4.88978	0.047	0.001	5.57715616209012e-62	SLCO2B1
1887	ENSG00000091039	1.68992218383792e-66	0.471058	0.972	0.67	6.15097876473324e-62	OSBPL8
1888	ENSG00000114812	1.69941251579026e-66	2.95735	0.081	0.008	6.18552167497337e-62	VIPR1
1889	ENSG00000287691	1.71076272163319e-66	1.33732	0.175	0.041	6.22683415420047e-62
1890	ENSG00000258947	1.71655813260006e-66	-2.11608	0.331	0.515	6.24792829103769e-62	TUBB3
1891	ENSG00000153234	1.80589153544965e-66	0.812385	0.35	0.127	6.57308401072963e-62	NR4A2
1892	ENSG00000101391	1.84359512073565e-66	0.78126	0.459	0.195	6.71031752045361e-62	CDK5RAP1
1893	ENSG00000198498	1.91522599934733e-66	-2.47037	0.22	0.444	6.97103959242443e-62	TMA16
1894	ENSG00000267535	1.93130878631785e-66	3.80913	0.061	0.004	7.02957772043971e-62	LINC00868
1895	ENSG00000136144	2.00018941117199e-66	0.551951	0.845	0.477	7.2802894187838e-62	RCBTB1
1896	ENSG00000085377	2.21479032358881e-66	0.674559	0.4	0.156	8.06139381979856e-62	PREP
1897	ENSG00000112655	2.33801563000528e-66	0.64852	0.429	0.173	8.50990929009321e-62	PTK7
1898	ENSG00000226581	2.36064945309842e-66	4.62026	0.046	0.001	8.59229187938762e-62	LINC02848
1899	ENSG00000272843	2.38775843159388e-66	2.43757	0.094	0.012	8.69096313931541e-62
1900	ENSG00000071127	2.94350258111689e-66	0.705514	0.391	0.15	1.07137606947493e-61	WDR1
1901	ENSG00000131149	3.0241105638867e-66	-0.751843	0.941	0.871	1.10071576304348e-61	GSE1
1902	ENSG00000165948	3.05737656078135e-66	0.924874	0.31	0.107	1.1128239205932e-61	IFI27L1
1903	ENSG00000125246	3.67862014228552e-66	0.510699	0.632	0.304	1.33894415938908e-61	CLYBL
1904	ENSG00000175265	3.98078522962805e-66	0.562642	0.609	0.283	1.44892620788002e-61	GOLGA8A
1905	ENSG00000148175	4.06310535083512e-66	2.03946	0.125	0.022	1.47888908559697e-61	STOM
1906	ENSG00000198408	4.46373911246032e-66	0.502693	0.967	0.728	1.62471176215331e-61	OGA
1907	ENSG00000137502	4.87817977615759e-66	0.622016	0.451	0.186	1.77555987492584e-61	RAB30
1908	ENSG00000145088	5.13257678959619e-66	1.59404	0.163	0.037	1.86815529987722e-61	EAF2
1909	ENSG00000225783	5.31164926498568e-66	-5.10123	0.021	0.257	1.93333409946949e-61	MIAT
1910	ENSG00000064102	5.40613059261574e-66	0.58171	0.531	0.231	1.96772341310028e-61	INTS13
1911	ENSG00000075303	5.53750062923211e-66	0.606852	0.492	0.212	2.0155394790279e-61	SLC25A40
1912	ENSG00000084636	6.22827149064668e-66	-2.97892	0.079	0.328	2.26696625716558e-61	COL16A1
1913	ENSG00000166986	6.34303393323369e-66	0.773768	0.402	0.158	2.3087374910184e-61	MARS1
1914	ENSG00000059915	7.92863156923641e-66	0.703328	0.498	0.218	2.88586331857067e-61	PSD
1915	ENSG00000254538	9.59223638145889e-66	0.598222	0.537	0.243	3.49138219812341e-61
1916	ENSG00000178053	1.12089570995987e-65	0.788054	0.348	0.131	4.07983620511195e-61	MLF1
1917	ENSG00000124570	1.29600196520293e-65	0.922461	0.337	0.123	4.71718795294563e-61	SERPINB6
1918	ENSG00000158470	1.45451025613519e-65	0.567441	0.611	0.29	5.29412643028086e-61	B4GALT5
1919	ENSG00000100578	1.4988907425676e-65	0.508615	0.837	0.465	5.45566252479754e-61	KIAA0586
1920	ENSG00000066032	1.68031970802705e-65	-2.49281	0.273	0.489	6.11602767327687e-61	CTNNA2
1921	ENSG00000161048	2.30199244336527e-65	0.549958	0.486	0.206	8.37879209536091e-61	NAPEPLD
1922	ENSG00000155530	2.33261673807557e-65	0.482008	0.718	0.357	8.49025840324747e-61	LRGUK
1923	ENSG00000111850	3.09581706583846e-65	0.606775	0.549	0.247	1.12681549562388e-60	SMIM8
1924	ENSG00000111850	3.09581706583846e-65	0.606775	0.549	0.247	1.12681549562388e-60	SMIM8
1925	ENSG00000147655	3.2999022891693e-65	-5.69586	0.011	0.243	1.20109843521184e-60	RSPO2
1926	ENSG00000161791	3.53867149927829e-65	0.770719	0.464	0.201	1.28800565230731e-60	FMNL3
1927	ENSG00000157216	3.86968428756154e-65	-0.900918	0.904	0.847	1.40848768698665e-60	SSBP3
1928	ENSG00000168818	4.36803279803395e-65	0.549864	0.681	0.343	1.5898765778284e-60	STX18
1929	ENSG00000223930	4.7435804430547e-65	2.91396	0.072	0.006	1.72656840966305e-60
1930	ENSG00000121060	4.94865799033369e-65	0.993908	0.244	0.074	1.80121253532166e-60	TRIM25
1931	ENSG00000172081	5.58933178532925e-65	0.930397	0.296	0.1	2.03440498322414e-60	MOB3A
1932	ENSG00000264924	5.605289586179e-65	2.24827	0.132	0.025	2.04021330357743e-60
1933	ENSG00000151948	5.80178867386257e-65	0.704372	0.485	0.211	2.1117350415125e-60	GLT1D1
1934	ENSG00000250421	6.96089312724245e-65	1.06312	0.288	0.099	2.53362588045371e-60
1935	ENSG00000105220	7.05437360826274e-65	0.691197	0.488	0.212	2.56765090593547e-60	GPI
1936	ENSG00000138764	8.12606124561088e-65	-2.0828	0.358	0.528	2.95772377217745e-60	CCNG2
1937	ENSG00000259709	8.15357032233855e-65	1.2423	0.223	0.064	2.96773652592478e-60
1938	ENSG00000120925	8.80169482704218e-65	0.624239	0.571	0.263	3.20364088314681e-60	RNF170
1939	ENSG00000249049	1.07922012718139e-64	2.60465	0.096	0.013	3.92814541891482e-60
1940	ENSG00000168661	1.12308147061211e-64	0.584012	0.614	0.293	4.08779193673397e-60	ZNF30
1941	ENSG00000163624	1.12534008635009e-64	1.28391	0.215	0.061	4.09601284629707e-60	CDS1
1942	ENSG00000149646	1.18041763372384e-64	1.30092	0.162	0.037	4.29648410322803e-60	CNBD2
1943	ENSG00000130635	1.50220100102096e-64	1.35183	0.259	0.084	5.46771120351608e-60	COL5A1
1944	ENSG00000145741	1.88149052971686e-64	-1.97397	0.321	0.506	6.84824923006341e-60	BTF3
1945	ENSG00000131724	1.99453121839416e-64	1.94509	0.149	0.032	7.25969472871107e-60	IL13RA1
1946	ENSG00000233912	2.00622874013346e-64	0.778233	0.304	0.104	7.30227136833778e-60
1947	ENSG00000164318	2.22200328813795e-64	0.401595	1	0.917	8.08764756816452e-60	EGFLAM
1948	ENSG00000159217	2.24269378934337e-64	-4.00989	0.033	0.269	8.16295685445198e-60	IGF2BP1
1949	ENSG00000007237	2.28777500008391e-64	0.682272	0.475	0.207	8.32704344530542e-60	GAS7
1950	ENSG00000135537	2.33780712674224e-64	0.463433	0.545	0.243	8.50915037991641e-60	AFG1L
1951	ENSG00000053438	2.34706232379745e-64	-2.9436	0.17	0.399	8.54283744615795e-60	NNAT
1952	ENSG00000135773	2.7574862763025e-64	2.01477	0.15	0.033	1.00366985484858e-59	CAPN9
1953	ENSG00000129116	2.7769432314175e-64	0.534141	0.732	0.388	1.01075179737134e-59	PALLD
1954	ENSG00000125633	2.84344304480027e-64	0.63565	0.521	0.234	1.0349563994464e-59	CCDC93
1955	ENSG00000079805	3.00004163905429e-64	0.585068	0.744	0.391	1.09195515578298e-59	DNM2
1956	ENSG00000107566	4.19760992427731e-64	0.741874	0.43	0.179	1.52784606023846e-59	ERLIN1
1957	ENSG00000114115	4.55167570393847e-64	-3.06555	0.095	0.335	1.65671892271953e-59	RBP1
1958	ENSG00000176769	4.71668247941585e-64	2.21097	0.119	0.021	1.71677808885778e-59	TCERG1L
1959	ENSG00000185518	4.81482227124625e-64	0.502326	0.94	0.615	1.75249901028821e-59	SV2B
1960	ENSG00000198952	4.92472834878457e-64	0.662286	0.45	0.189	1.79250262439061e-59	SMG5
1961	ENSG00000248802	4.97869236143508e-64	3.1557	0.069	0.006	1.81214444571514e-59
1962	ENSG00000141505	5.55785636934659e-64	1.25871	0.219	0.063	2.02294856131477e-59	ASGR1
1963	ENSG00000090615	6.57834090699663e-64	0.955468	0.365	0.142	2.39438452332863e-59	GOLGA3
1964	ENSG00000151466	6.6122840240179e-64	0.459148	0.897	0.559	2.40673913906204e-59	SCLT1
1965	ENSG00000109911	6.92134151755565e-64	0.39257	0.761	0.395	2.5192298855599e-59	ELP4
1966	ENSG00000283648	8.75485798538013e-64	1.69865	0.144	0.03	3.18659320951866e-59
1967	ENSG00000187229	9.65616718119475e-64	1.67667	0.151	0.033	3.51465173061126e-59
1968	ENSG00000235194	1.05592804154711e-63	0.683957	0.393	0.153	3.84336688562318e-59	PPP1R3E
1969	ENSG00000176887	1.14581417571412e-63	-4.1683	0.047	0.281	4.17053443676425e-59	SOX11
1970	ENSG00000144468	1.21971306266368e-63	0.514973	0.596	0.28	4.43951160548326e-59	RHBDD1
1971	ENSG00000091157	1.26953437594628e-63	0.498891	0.931	0.575	4.62085122156926e-59	WDR7
1972	ENSG00000097021	1.30624822034369e-63	0.801978	0.365	0.139	4.75448227240695e-59	ACOT7
1973	ENSG00000106125	1.31722307435371e-63	0.689775	0.369	0.141	4.79442854603262e-59	MINDY4
1974	ENSG00000247708	1.42580545352469e-63	0.5185	0.632	0.308	5.18964668973917e-59	STX18-AS1
1975	ENSG00000134146	1.51081847395564e-63	0.463314	0.886	0.532	5.49907708150373e-59	DPH6
1976	ENSG00000179314	1.5937366853257e-63	-1.732	0.393	0.553	5.80088278724847e-59	WSCD1
1977	ENSG00000243144	1.74229156340304e-63	0.512989	0.679	0.345	6.34159283247438e-59	LINC02932
1978	ENSG00000166411	1.75983860591931e-63	1.00203	0.32	0.116	6.40546055782509e-59	IDH3A
1979	ENSG00000197977	1.97874981064477e-63	0.558392	0.799	0.445	7.20225356078483e-59	ELOVL2
1980	ENSG00000198054	2.19669410199212e-63	2.78783	0.086	0.01	7.99552719243093e-59	DSCR8
1981	ENSG00000066135	2.25355525421031e-63	0.722471	0.506	0.226	8.2024904142747e-59	KDM4A
1982	ENSG00000036473	2.28422007020222e-63	4.35128	0.053	0.003	8.31410421152206e-59	OTC
1983	ENSG00000237491	2.35529358267341e-63	0.852904	0.278	0.092	8.57279758221467e-59	LINC01409
1984	ENSG00000272483	2.5184424236108e-63	2.05726	0.132	0.026	9.16662673345859e-59
1985	ENSG00000270164	2.51930215980811e-63	4.11341	0.05	0.002	9.16975600126956e-59	LINC01480
1986	ENSG00000066629	2.53136508199452e-63	0.498748	0.984	0.826	9.21366262544366e-59	EML1
1987	ENSG00000248787	2.74827185195412e-63	0.813553	0.379	0.149	1.00031598867426e-58
1988	ENSG00000239672	2.89743908664572e-63	0.661307	0.464	0.198	1.05460987875731e-58	NME1
1989	ENSG00000116251	3.16621112396243e-63	-1.47678	0.6	0.647	1.15243752489985e-58	RPL22
1990	ENSG00000113790	3.86898945882792e-63	1.54869	0.164	0.038	1.40823478322419e-58	EHHADH
1991	ENSG00000197971	4.40176636464865e-63	2.65012	0.098	0.014	1.60215492140482e-58	MBP
1992	ENSG00000171303	4.61761996988456e-63	-3.0307	0.09	0.328	1.68072131663858e-58	KCNK3
1993	ENSG00000106524	4.62578696487652e-63	0.637452	0.464	0.199	1.68369393947576e-58	ANKMY2
1994	ENSG00000198133	4.65819586088926e-63	3.64329	0.074	0.007	1.69549012944647e-58	TMEM229B
1995	ENSG00000115896	5.11320628482372e-63	0.416836	0.77	0.415	1.86110482355014e-58	PLCL1
1996	ENSG00000169762	5.11835024815023e-63	0.688335	0.71	0.386	1.86297712332172e-58	TAPT1
1997	ENSG00000225377	5.23033775601371e-63	0.866415	0.327	0.12	1.90373833643387e-58	NRSN2-AS1
1998	ENSG00000182901	5.31768048487304e-63	-5.34714	0.035	0.265	1.93552934288409e-58	RGS7
[truncated: 14,739 more rows]

## Sheet: Supplementary File 1F
Supplementary File 1F	SCENIC RSS scores for low resolution clusters
Regulon	TopRSS	ATF4_(+)	CEBPB_(+)	CRX_(+)	CUX1_(+)	E2F1_(+)	E2F2_(+)	E2F3_(+)	E2F4_(+)	E2F7_(+)	E2F8_(+)	EGR1_(+)	EGR2_(+)	EGR3_(+)	FOS_(+)	FOXI3_(+)	HMX1_(+)	HSF1_(+)	IKZF1_(+)	ISL2_(+)	JUN_(+)	JUNB_(+)	JUND_(+)	KLF5_(+)	KLF6_(+)	LHX3_(+)	LHX9_(+)	LYL1_(+)	MAZ_(+)	MXD3_(+)	MXI1_(+)	MYCN_(+)	NEUROD1_(+)	NFIL3_(+)	NR2F6_(+)	NRL_(+)	OLIG2_(+)	OTX2_(+)	PATZ1_(+)	PAX6_(+)	RAX_(+)	SOX2_(+)	SOX9_(+)	SP3_(+)	SPI1_(+)	TFDP1_(+)	THAP11_(+)	THRB_(+)	VEZF1_(+)
RPC/MG	PAX6_(+)	0.266385	0.462977	0.192838	0.240774	0.364298	0.487701	0.489145	0.310566	0.384203	0.381066	0.286166	0.460803	0.496635	0.274842	0.359881	0.311415	0.24741	0.321147	0.185778	0.351613	0.272823	0.28112	0.355073	0.308569	0.190677	0.379836	0.236048	0.27193	0.258793	0.263081	0.260582	0.19794	0.283074	0.21292	0.231091	0.265691	0.236007	0.250728	0.576523	0.251027	0.395957	0.437558	0.336402	0.295858	0.291558	0.274586	0.179522	0.232367
iPRP	OLIG2_(+)	0.279019	0.243402	0.272867	0.278304	0.285358	0.246403	0.261117	0.261478	0.283865	0.281246	0.271545	0.257395	0.221036	0.279594	0.213468	0.294665	0.26069	0.292232	0.276687	0.282001	0.279628	0.283687	0.264907	0.287942	0.252265	0.321557	0.19075	0.28353	0.269569	0.283809	0.283781	0.279098	0.28171	0.253407	0.249037	0.324752	0.281872	0.278255	0.272311	0.287199	0.290004	0.289495	0.284599	0.223307	0.277965	0.28251	0.272514	0.287207
ER	NRL_(+)	0.356464	0.240776	0.36783	0.350445	0.332424	0.272343	0.270844	0.302275	0.330187	0.328251	0.338145	0.281975	0.223477	0.34834	0.225834	0.353561	0.320591	0.325151	0.287934	0.341439	0.34857	0.357421	0.290373	0.328544	0.318164	0.301001	0.176469	0.343956	0.316	0.360464	0.334439	0.365992	0.341901	0.330499	0.434597	0.252338	0.353248	0.311015	0.2622	0.333036	0.334774	0.325132	0.335115	0.201449	0.336439	0.356171	0.261726	0.36664
LR	NRL_(+)	0.274439	0.190166	0.282201	0.261463	0.241193	0.193359	0.208037	0.23464	0.23914	0.23969	0.26681	0.236199	0.183131	0.261644	0.18577	0.233309	0.258296	0.231535	0.209032	0.246557	0.264662	0.259235	0.210393	0.241942	0.280726	0.206993	0.176852	0.258387	0.253431	0.252618	0.254445	0.270393	0.259949	0.276962	0.348637	0.184009	0.266224	0.227926	0.198723	0.232078	0.235205	0.232597	0.234639	0.188908	0.258454	0.256635	0.214001	0.269425
LM	THRB_(+)	0.508807	0.273463	0.539494	0.470242	0.468591	0.294275	0.304976	0.413508	0.457931	0.452969	0.514019	0.394558	0.214772	0.516775	0.207216	0.491223	0.525834	0.455468	0.65099	0.471157	0.515434	0.504093	0.34058	0.511527	0.585325	0.390144	0.175809	0.520532	0.528056	0.507304	0.542376	0.543997	0.516484	0.544568	0.407724	0.349482	0.536964	0.417005	0.295739	0.554559	0.440931	0.408556	0.418105	0.271772	0.514142	0.506609	0.66867	0.449394
S	HSF1_(+)	0.207084	0.183006	0.211858	0.208949	0.201472	0.184466	0.189265	0.196384	0.201049	0.203527	0.204928	0.183769	0.174857	0.206544	0.190639	0.198118	0.220895	0.20366	0.198722	0.199349	0.207448	0.204947	0.179032	0.204986	0.207166	0.190485	0.167445	0.207837	0.204442	0.204451	0.208081	0.207263	0.206832	0.215997	0.198567	0.202445	0.209751	0.190534	0.176237	0.206594	0.197673	0.197147	0.20435	0.180032	0.206746	0.20538	0.198723	0.205721
[truncated: 2 more columns]

## Sheet: Supplementary File 1G
Supplementary File 1G	Differentially expressed genes for high resolution MG and RPC clusters
ensgene	symbol	p_val	log2FC	pct.1	pct.2	p_val_adj
ENSG00000267736	HMGB2P1	3.93e-12	0.324724	0.977	0.686	2.21e-07
ENSG00000131747	TOP2A	4.05e-12	2.89541	0.977	0.457	2.28e-07
	RP11-386G11.10	4.39e-11	1.47335	1	1	2.46789e-06
ENSG00000080986	NDC80	2.89e-10	2.2186	0.744	0	1.62868e-05
ENSG00000183311	TUBB	4.41e-10	1.77912	1	1	2.48118e-05
ENSG00000137807	KIF23	6.39e-10	2.40029	0.744	0.029	3.59738e-05
ENSG00000122952	ZWINT	7.83e-10	1.56981	0.93	0.171	4.40769e-05
ENSG00000137804	NUSAP1	7.89e-10	2.4411	0.884	0.486	4.43792e-05
ENSG00000168078	PBK	1.13e-09	2.03819	0.791	0.143	6.37808e-05
ENSG00000164104	HMGB2	1.38e-09	2.00936	1	0.971	7.75707e-05
ENSG00000143476	DTL	1.41e-09	1.2524	0.884	0.314	7.91613e-05
	KIAA0101	2.34e-09	1.54867	0.837	0.171	0.000131742
ENSG00000152253	SPC25	3.92e-09	2.1179	0.698	0.029	0.000220544
ENSG00000123219	CENPK	4.62e-09	1.29088	0.884	0.286	0.000260042
ENSG00000079616	KIF22	5.8e-09	1.95566	0.907	0.314	0.000326497
ENSG00000123416	TUBA1B	6e-09	1.7415	1	1	0.000337429
ENSG00000168496	FEN1	9.41e-09	2.16177	0.953	0.6	0.000529213
ENSG00000163808	KIF15	1.19e-08	1.22671	0.674	0.029	0.000669586
ENSG00000198830	HMGN2	1.84e-08	1.27189	1	1	0.00103799
ENSG00000171320	ESCO2	2.02e-08	1.17275	0.698	0.086	0.00113561
ENSG00000170312	CDK1	2.23e-08	2.99686	0.791	0.257	0.00125512
ENSG00000148773	MKI67	2.49e-08	1.03149	0.744	0.2	0.00140184
ENSG00000188229	TUBB4B	2.61e-08	1.84982	1	0.971	0.00146927
ENSG00000167900	TK1	3.07e-08	1.62548	0.651	0.029	0.00172994
ENSG00000088325	TPX2	3.34e-08	2.08816	0.721	0.143	0.00187934
ENSG00000103121	CMC2	3.37e-08	0.927179	0.93	0.4	0.00189678
ENSG00000136824	SMC2	3.72e-08	0.970417	0.907	0.314	0.00209548
ENSG00000112029	FBXO5	3.74e-08	1.73073	0.837	0.286	0.00210422
ENSG00000230330	HMGN2P3	3.9e-08	0.776745	1	1	0.00219393
ENSG00000127589	TUBBP1	4.11e-08	0.534312	0.977	0.886	0.00231325
ENSG00000178999	AURKB	4.35e-08	2.88766	0.674	0.086	0.00244592
ENSG00000105011	ASF1B	4.84e-08	1.67311	0.721	0.143	0.00272482
ENSG00000129534	MIS18BP1	5.52e-08	1.72636	0.837	0.257	0.00310508
ENSG00000132967	HMGB1P5	5.79e-08	1.06482	1	1	0.00326028
ENSG00000213707	HMGB1P10	6.13e-08	0.731965	1	1	0.00344874
ENSG00000142945	KIF2C	6.31e-08	1.32664	0.651	0.029	0.00355184
ENSG00000109805	NCAPG	6.77e-08	1.5054	0.674	0.086	0.00380723
ENSG00000167325	RRM1	6.9e-08	1.68069	0.93	0.543	0.00388298
ENSG00000214222	TUBBP2	7.62e-08	0.479142	1	0.829	0.00428538
ENSG00000136108	CKAP2	9.09e-08	1.66519	0.86	0.429	0.00511667
ENSG00000169607	CKAP2L	1.1e-07	1.06156	0.674	0.114	0.00621335
ENSG00000165480	SKA3	1.11e-07	1.3329	0.651	0.086	0.00624015
ENSG00000214391	TUBAP2	1.19e-07	0.829595	1	1	0.00671751
ENSG00000165891	E2F7	1.26e-07	0.601884	0.744	0.2	0.00711565
ENSG00000011426	ANLN	1.27e-07	0.755517	0.651	0.057	0.00717206
ENSG00000091651	ORC6	1.28e-07	1.16263	0.767	0.143	0.00720826
ENSG00000156802	ATAD2	1.35e-07	1.21156	0.907	0.457	0.00759629
	FAM64A	1.48e-07	1.71972	0.698	0.171	0.00834342
ENSG00000077152	UBE2T	1.54e-07	1.95915	0.814	0.2	0.00867709
ENSG00000164109	MAD2L1	1.63e-07	1.26094	0.814	0.314	0.00917238
ENSG00000188486	H2AFX	1.69e-07	1.42387	0.86	0.486	0.0095168
ENSG00000132646	PCNA	1.82e-07	1.79975	0.907	0.657	0.0102625
ENSG00000228716	DHFR	1.86e-07	0.92681	0.86	0.4	0.0104738
ENSG00000129810	SGO1	2.18e-07	1.16953	0.674	0.086	0.0122738
ENSG00000121211	MND1	2.53e-07	1.25364	0.558	0	0.0142305
ENSG00000089685	BIRC5	2.54e-07	1.38315	0.721	0.229	0.0142692
ENSG00000124207	CSE1L	4.03e-07	1.19427	0.907	0.371	0.0226735
ENSG00000189057	FAM111B	4.38e-07	1.08441	0.791	0.229	0.0246344
ENSG00000111247	RAD51AP1	4.73e-07	0.683004	0.791	0.143	0.0266233
ENSG00000167553	TUBA1C	5.36e-07	0.884523	1	1	0.0301312
ENSG00000065328	MCM10	5.4e-07	0.788076	0.535	0	0.0304076
ENSG00000090889	KIF4A	5.45e-07	0.948821	0.698	0.143	0.0306543
ENSG00000109475	RPL34	5.64e-07	-1.02734	0.977	1	0.0317453
ENSG00000198901	PRC1	5.7e-07	1.3877	0.884	0.457	0.0320905
ENSG00000234664	HMGN2P5	6.77e-07	0.398504	0.977	0.971	0.0380713
ENSG00000249014	HMGN2P4	6.94e-07	0.45968	1	1	0.0390759
ENSG00000143228	NUF2	7.21e-07	1.40982	0.651	0.086	0.0405842

## Sheet: Supplementary File 1H
Supplementary File 1H	SCENIC RSS scores for high resolution clusters
Regulon	TopRSS	ARID3B_(+)	ASCL1_(+)	ATF4_(+)	ATOH7_(+)	CEBPB_(+)	CREB5_(+)	CREBZF_(+)	CRX_(+)	CTCF_(+)	CUX1_(+)	DBP_(+)	DEAF1_(+)	DLX1_(+)	DNTTIP1_(+)	DPF1_(+)	E2F1_(+)	E2F2_(+)	E2F3_(+)	E2F4_(+)	E2F7_(+)	E2F8_(+)	EGR2_(+)	EGR3_(+)	EPAS1_(+)	ETV1_(+)	ETV5_(+)	FEZF2_(+)	FOS_(+)	FOXI3_(+)	FOXM1_(+)	FOXN1_(+)	FOXN4_(+)	FOXP4_(+)	GLI1_(+)	GLI2_(+)	GTF2I_(+)	GTF3A_(+)	HES1_(+)	HES4_(+)	HES5_(+)	HES6_(+)	HEY2_(+)	HEYL_(+)	HINFP_(+)	HMG20B_(+)	HMGA1_(+)	HMGN3_(+)	HMX1_(+)
cRPC	ETV1_(+)	0.188488	0.318357	0.231015	0.257205	0.333215	0.355828	0.234487	0.180328	0.250912	0.238562	0.222275	0.224318	0.249882	0.229004	0.390514	0.306245	0.420547	0.42999	0.234819	0.334406	0.369089	0.353426	0.258438	0.20301	0.471279	0.376906	0.341309	0.235314	0.361473	0.328212	0.195852	0.344068	0.221694	0.413112	0.353176	0.230132	0.22883	0.409214	0.293477	0.299662	0.238158	0.321266	0.241979	0.215443	0.25007	0.22886	0.245231	0.260931
MG	NFIA_(+)	0.18912	0.266479	0.217817	0.236069	0.256474	0.343547	0.220105	0.181609	0.236248	0.224622	0.218153	0.212463	0.230156	0.215571	0.232326	0.261962	0.223624	0.267226	0.224286	0.258758	0.254659	0.292608	0.253088	0.203661	0.228627	0.377167	0.306705	0.221057	0.260394	0.240407	0.193214	0.265203	0.219957	0.317864	0.310358	0.217119	0.21375	0.378457	0.263957	0.273298	0.222725	0.295955	0.227044	0.205477	0.225908	0.215075	0.228158	0.247249
iPRP	LHX9_(+)	0.254173	0.279146	0.278335	0.302928	0.272294	0.254082	0.281599	0.277601	0.278325	0.277215	0.270262	0.279238	0.308568	0.2809	0.243105	0.278134	0.264107	0.255713	0.270308	0.274186	0.269453	0.265512	0.256702	0.224821	0.241495	0.253	0.281548	0.279035	0.271846	0.277948	0.233827	0.27444	0.275129	0.246836	0.248867	0.28223	0.275545	0.252876	0.279895	0.278405	0.283204	0.253878	0.273394	0.278189	0.278177	0.284669	0.281394	0.28333
LM1	THRB_(+)	0.287934	0.288044	0.304816	0.301889	0.290494	0.249163	0.306792	0.325193	0.303159	0.297288	0.300235	0.316788	0.238548	0.31055	0.244988	0.290115	0.277035	0.240555	0.299358	0.290119	0.281943	0.273257	0.279465	0.246582	0.250986	0.23363	0.260326	0.308494	0.273101	0.290636	0.2753	0.283851	0.326159	0.229584	0.256457	0.310887	0.306978	0.227849	0.293114	0.288883	0.310278	0.267746	0.291176	0.29773	0.305265	0.315811	0.308418	0.300812
LM2	DBP_(+)	0.268892	0.270525	0.288131	0.282688	0.267111	0.237617	0.287862	0.287026	0.277229	0.280756	0.310555	0.300936	0.240359	0.294507	0.253838	0.276754	0.243081	0.234705	0.289088	0.267422	0.260667	0.262016	0.263958	0.23091	0.214114	0.226915	0.256205	0.291595	0.262663	0.272054	0.261899	0.265936	0.291957	0.220202	0.245559	0.289713	0.294156	0.22654	0.276803	0.273896	0.291818	0.248989	0.273767	0.280955	0.293507	0.293945	0.289877	0.286555
LM3	THRB_(+)	0.26117	0.254318	0.271821	0.264359	0.247457	0.229623	0.271259	0.28568	0.262044	0.2632	0.273056	0.281426	0.218164	0.278299	0.241141	0.25734	0.246026	0.219536	0.271438	0.255695	0.247687	0.245647	0.250266	0.229032	0.224251	0.216948	0.230803	0.274632	0.243225	0.256972	0.261345	0.25092	0.278183	0.21574	0.224049	0.27488	0.276267	0.207346	0.261075	0.255557	0.276058	0.25147	0.25421	0.26595	0.272169	0.279344	0.2755	0.262213
LM4	POU6F2_(+)	0.256173	0.243684	0.266747	0.252968	0.236577	0.222565	0.265809	0.268124	0.246505	0.255741	0.280571	0.276281	0.205418	0.276522	0.233197	0.248705	0.22112	0.226872	0.267	0.240837	0.234386	0.236778	0.250648	0.225637	0.217519	0.208736	0.229094	0.268657	0.232679	0.242472	0.262479	0.241073	0.248125	0.198602	0.223006	0.266835	0.279654	0.20376	0.252958	0.247614	0.267604	0.236905	0.25495	0.268133	0.268321	0.269383	0.26896	0.253729
S	POU6F2_(+)	0.211167	0.200451	0.206764	0.204461	0.197905	0.192137	0.207887	0.212385	0.204476	0.204311	0.205025	0.206545	0.200035	0.210256	0.189351	0.200623	0.195797	0.193646	0.204877	0.200651	0.200657	0.196956	0.200106	0.193246	0.184729	0.187725	0.195283	0.206851	0.19614	0.20106	0.213914	0.198586	0.199076	0.190953	0.189368	0.208235	0.214291	0.184422	0.202366	0.200586	0.206237	0.194542	0.20261	0.211218	0.206049	0.208	0.206826	0.200399
TR	IKZF1_(+)	0.209014	0.2222	0.213205	0.222622	0.212986	0.2333	0.21284	0.215011	0.225865	0.21783	0.201808	0.208699	0.256642	0.210371	0.223935	0.219823	0.216576	0.210837	0.221182	0.220779	0.219985	0.221302	0.225504	0.210548	0.222792	0.234	0.225116	0.211967	0.219536	0.219886	0.205195	0.221154	0.215638	0.206937	0.219203	0.213079	0.207273	0.228716	0.220215	0.222159	0.213169	0.209712	0.216167	0.212841	0.214164	0.212518	0.212668	0.21591
ER	NFIB_(+)	0.373603	0.32581	0.347256	0.336753	0.292163	0.294605	0.345357	0.357506	0.351021	0.353579	0.327256	0.328699	0.263083	0.322506	0.295854	0.325747	0.295494	0.266511	0.332162	0.322906	0.314196	0.310016	0.330771	0.379304	0.270314	0.294727	0.318111	0.340866	0.317897	0.327761	0.343386	0.318752	0.34089	0.282154	0.317339	0.344714	0.322426	0.272385	0.324583	0.326363	0.338023	0.314965	0.368109	0.347398	0.332987	0.33614	0.330269	0.345383
LR	EPAS1_(+)	0.347538	0.237292	0.273855	0.238495	0.222089	0.233443	0.268014	0.282021	0.251717	0.274033	0.248635	0.25854	0.239986	0.266604	0.222171	0.241303	0.2342	0.221664	0.257453	0.240335	0.237075	0.234856	0.269857	0.443324	0.193266	0.210268	0.216005	0.262733	0.239357	0.243306	0.392365	0.236224	0.24395	0.212138	0.24817	0.262687	0.271751	0.205638	0.240907	0.240786	0.255495	0.250803	0.275277	0.289844	0.254008	0.25749	0.258202	0.24073
[truncated: 97 more columns]

## Sheet: Supplementary File 1I
Supplementary File 1I	Pseudotime-correlated genes and gene modules
gene	module	p_value	morans_test_statistic	morans_I	q_value
RCVRN	1	7.91913e-121	23.3441	0.375394	3.80997e-116
GNB3	1	2.44651e-55	15.6253	0.257061	1.96174e-51
AIPL1	1	1.93114e-43	13.77	0.225598	8.44628e-40
IMPG2	1	4.06653e-35	12.3087	0.203095	1.3043e-31
CDCA3	1	2.3355e-27	10.7719	0.177293	5.35063e-24
OLFM1	1	2.28956e-25	10.3414	0.172088	4.07975e-22
CRABP2	1	1.19735e-22	9.72347	0.158732	1.74562e-19
UNC119	1	1.76394e-19	8.95084	0.148213	1.9736e-16
MT2A	1	5.04495e-17	8.30372	0.137962	4.57958e-14
LGALSL	1	1.98487e-16	8.13948	0.135287	1.64645e-13
HOTAIRM1-5	1	4.8979e-16	8.02939	0.133466	3.863e-13
SFXN3	1	2.74812e-15	7.815	0.129825	2.03408e-12
KCNV2	1	1.20028e-14	7.62712	0.126052	7.40345e-12
HDDC2	1	1.47943e-14	7.60011	0.124922	8.89708e-12
HOTAIRM1-4	1	3.20146e-14	7.49957	0.124495	1.81206e-11
RAB1A	1	1.11735e-13	7.33395	0.121493	5.78031e-11
LHX3	1	1.55422e-13	7.28961	0.12085	7.95478e-11
HOTAIRM1	1	1.25192e-12	7.00309	0.11608	5.68217e-10
MT1F	1	5.46357e-12	6.79373	0.111983	2.17238e-09
MT1XP1	1	1.08837e-11	6.69365	0.110473	4.15574e-09
HOTAIRM1-1	1	8.56313e-11	6.38512	0.105409	2.82178e-08
MT1X	1	7.97496e-10	6.03446	0.0996419	2.1198e-07
LOXL1-AS1	1	9.88786e-10	5.99964	0.0987345	2.57143e-07
RXRG	1	1.4164e-09	5.94101	0.0916824	3.58655e-07
CLTB	1	6.2689e-09	5.69225	0.0938178	1.42266e-06
MT1P3	1	9.10432e-09	5.62821	0.0924075	1.98212e-06
PLEKHB1	1	1.73825e-08	5.51557	0.0900673	3.57389e-06
GRSF1	1	2.14715e-08	5.4783	0.090299	4.3404e-06
IFI16	1	2.16903e-08	5.47651	0.0902129	4.36629e-06
F10	1	5.79961e-08	5.2997	0.0870004	1.05691e-05
GNGT2	1	7.0991e-08	5.26267	0.086545	1.26498e-05
PPP2R3C	1	8.57872e-08	5.22776	0.086077	1.51184e-05
SFXN4	1	1.36613e-07	5.14104	0.0843441	2.2981e-05
MATK	1	1.42746e-07	5.13278	0.0844418	2.35194e-05
SPON2	1	2.00748e-07	5.06825	0.0831371	3.19808e-05
ATP5E	1	2.34666e-07	5.03844	0.0812513	3.67753e-05
LAPTM4B	1	4.3429e-07	4.91929	0.0800932	6.37016e-05
NTNG2	1	5.92586e-07	4.8581	0.079788	8.41e-05
FUNDC1	1	7.41601e-07	4.81349	0.0790252	0.000103418
HSD11B1L	1	7.92735e-07	4.80015	0.0787807	0.000108043
NDRG3	1	1.23527e-06	4.71055	0.0770655	0.000154363
ATP5G1	1	1.30594e-06	4.6992	0.0767009	0.000161517
ABHD10	1	1.46177e-06	4.67612	0.0767255	0.000178496
NME2	1	1.81563e-06	4.63144	0.0759392	0.000215153
EGFLAM	1	1.8249e-06	4.63039	0.075664	0.000215719
ENC1	1	2.42608e-06	4.57108	0.0749411	0.00027857
WDR1	1	2.45529e-06	4.56857	0.0747087	0.000280586
FMC1	1	2.75742e-06	4.54418	0.0744337	0.000304271
LAPTM4BP2	1	3.44116e-06	4.4973	0.0736536	0.000368725
SPINT2	1	3.91072e-06	4.47001	0.0732602	0.000411704
SPG21	1	4.23797e-06	4.4528	0.0729633	0.00043848
C16orf74	1	4.72397e-06	4.42944	0.072549	0.00048563
RP1-273G13.2	1	5.13183e-06	4.41154	0.0722473	0.000512726
IFT22	1	5.36817e-06	4.40179	0.0717537	0.000529238
STAU2	1	6.03413e-06	4.37635	0.0716242	0.000578302
PACSIN1	1	7.38531e-06	4.33208	0.0708731	0.000688594
SIL1	1	7.44166e-06	4.33041	0.0708971	0.000692506
CISD1	1	7.90343e-06	4.31713	0.0706736	0.000728433
HIGD2A	1	9.44e-06	4.27774	0.0699901	0.000844178
GLRX5	1	9.46923e-06	4.27705	0.0699619	0.000845221
TMEM199	1	1.16586e-05	4.2305	0.0691887	0.00100882
PPP1R14BP2	1	1.25398e-05	4.21408	0.0689095	0.00107158
RAX2	1	1.37595e-05	4.19308	0.0682192	0.00115823
DDAH1	1	1.4073e-05	4.18797	0.0680858	0.00117751
BRE	1	1.45612e-05	4.18022	0.0683107	0.00120785
RP11-977G19.10	1	1.49442e-05	4.17431	0.0682348	0.00123536
PPP1R14B	1	1.5411e-05	4.16731	0.0680958	0.00126741
NDUFV2P1	1	1.55029e-05	4.16595	0.0678044	0.00127063
UQCRH	1	1.66383e-05	4.1498	0.0673243	0.00134762
ALS2CR12	1	2.29884e-05	4.07519	0.0658069	0.00176023
CLNS1A	1	2.97519e-05	4.01477	0.0654508	0.002182
HOXA1	1	3.18802e-05	3.99844	0.0652043	0.00229831
PSMD6	1	3.30609e-05	3.98983	0.0651027	0.00236343
PRDX1	1	3.8577e-05	3.95307	0.060086	0.00271739
OXLD1	1	3.87877e-05	3.95177	0.0644518	0.00272029
SLC1A7	1	3.89264e-05	3.95092	0.0639097	0.00272604
LBH	1	4.04404e-05	3.94177	0.0641934	0.00281567
NEK11	1	4.16293e-05	3.93482	0.0639524	0.00288176
UQCRHL	1	4.33294e-05	3.9252	0.0637936	0.00296954
TMEM261	1	5.02262e-05	3.8895	0.063381	0.0033702
MRPL27	1	5.55448e-05	3.865	0.0630136	0.0036557
MRPL33	1	5.84438e-05	3.85256	0.0625689	0.00381518
DNAJC9	1	6.28064e-05	3.83491	0.0625057	0.00403428
LDHB	1	6.4042e-05	3.83011	0.0590382	0.0041027
ARL4C	1	6.42156e-05	3.82945	0.0622707	0.00410835
RPL17-C18orf32	1	6.56736e-05	3.82392	0.0623286	0.00416837
ARPC1A	1	6.64878e-05	3.82088	0.0622392	0.00420341
TTC1	1	6.77663e-05	3.81618	0.0621868	0.00427861
NDUFA6	1	6.85192e-05	3.81345	0.0619244	0.00432048
MOAP1	1	7.1948e-05	3.80137	0.0619065	0.00448961
BLOC1S1	1	7.3241e-05	3.79696	0.0617963	0.00454085
SNRPC	1	7.734e-05	3.78343	0.0613916	0.00472796
CFDP1	1	8.87814e-05	3.74897	0.0606961	0.00530339
FAM173A	1	9.44089e-05	3.73353	0.0608003	0.00557313
MRPL32	1	0.000101423	3.71545	0.06047	0.00591459
SURF1	1	0.000126152	3.65991	0.0595093	0.00701651
RP11-386G11.10	1	0.000128195	3.65579	0.0575999	0.00708916
E2F4	1	0.000128522	3.65514	0.0594021	0.00709909
ATP5EP2	1	0.000131597	3.64907	0.0586507	0.00721921
POLDIP2	1	0.000136735	3.63921	0.0591912	0.0074333
PRPSAP2	1	0.000140977	3.63134	0.0590106	0.00761229
MMAB	1	0.000144424	3.6251	0.0589605	0.00775488
MESP2	1	0.000153293	3.60967	0.0585225	0.00812232
STARD3NL	1	0.000158718	3.60064	0.0585476	0.00833636
CPLX3	1	0.000163	3.59371	0.0584189	0.0085333
CAMTA1	1	0.000164833	3.5908	0.0581826	0.00855477
NDUFV2	1	0.000171664	3.5802	0.0577663	0.00887105
CCT6A	1	0.000187419	3.55719	0.0575613	0.0095417
EPS8	1	0.00023829	3.49359	0.0566736	0.0115919
MRPS24	1	0.000243345	3.48798	0.0566147	0.0118228
RRAD	1	0.000254489	3.47599	0.0562287	0.0122929
RNASET2	1	0.000271793	3.45831	0.0560184	0.0129853
CYCSP45	1	0.000274345	3.45579	0.0560804	0.013081
LINC00998	1	0.000303524	3.42845	0.0556389	0.0142606
PPP1R14BP3	1	0.000317589	3.41613	0.0554015	0.0147771
RP3-437C15.1	1	0.0003265	3.40859	0.0552544	0.0150471
GOT1	1	0.000337891	3.39922	0.0551182	0.0154674
HMGN2	1	0.000367143	3.37645	0.0510186	0.0164466
TMEM256	1	0.000388333	3.36098	0.0544984	0.0171148
RCN2	1	0.000391125	3.359	0.0543913	0.0172006
PCBD1	1	0.000395347	3.35603	0.0543878	0.0173545
DUSP26	1	0.000406181	3.34855	0.0542242	0.0176972
DYNLT1	1	0.000406464	3.34835	0.0541976	0.0176972
MIR4477A	1	0.00040805	3.34728	0.053859	0.0177502
MYL6B	1	0.000428697	3.33357	0.0538917	0.0183988
PIPOX	1	0.000446242	3.32239	0.0534279	0.0189824
SUMO3	1	0.000449718	3.32023	0.0537154	0.019073
RTN3P1	1	0.000469557	3.30816	0.0534911	0.0197818
IDI1	1	0.000499744	3.29067	0.0533002	0.0207448
NME1-NME2	1	0.000519793	3.27959	0.0531041	0.0213741
SSBP1	1	0.000532045	3.27301	0.0529493	0.0217294
RP11-395G23.3	1	0.000536271	3.27077	0.0529352	0.0218279
MYCN	1	0.000560008	3.2585	0.052682	0.0224708
KBTBD4	1	0.000562896	3.25704	0.0527011	0.0225494
MAGOH3P	1	0.000575974	3.25052	0.0524742	0.0229044
SRBD1	1	0.000587143	3.24505	0.0523381	0.0232686
EMC10	1	0.000601656	3.23809	0.052367	0.0236997
UNC50	1	0.000620988	3.22906	0.0522646	0.024211
SNF8	1	0.00068121	3.2025	0.0518055	0.026002
NCBP2-AS2	1	0.000684195	3.20124	0.0517674	0.0260834
ELOVL1	1	0.000734432	3.18077	0.0510979	0.0275403
SERF1A	1	0.000733112	3.18129	0.0511965	0.0275403
RMST	1	0.00076504	3.16892	0.0510937	0.0283566
RMST-10	1	0.000808292	3.1529	0.0501845	0.0295904
COPS8	1	0.000812609	3.15134	0.0508496	0.0296402
YIF1B	1	0.000813485	3.15103	0.050943	0.0296497
ECHS1	1	0.000816128	3.15008	0.0508473	0.0297235
ELP5	1	0.000824162	3.14722	0.050873	0.0299481
CHMP2A	1	0.000831731	3.14454	0.0506577	0.0301548
RPL36AL	1	0.000876861	3.12905	0.0503848	0.0313077
PTGES2	1	0.000933714	3.11054	0.0502425	0.0328079
GSTM2	1	0.000948395	3.10593	0.0501513	0.0331243
C1QTNF4	1	0.000958575	3.10278	0.0501184	0.0332023
PGRMC1	1	0.000958204	3.10289	0.0500897	0.0332023
RP11-204C16.4	1	0.000982838	3.09537	0.0494812	0.0337752
MYL5	1	0.000990042	3.0932	0.0498533	0.0339985
EIF1AX	1	0.00100753	3.088	0.0498058	0.0345497
ARL4D	1	0.00102933	3.08164	0.0496786	0.0350228
PIGP	1	0.00103682	3.07948	0.0497203	0.0352525
AC012354.8	1	0.00104406	3.0774	0.0496882	0.0354736
RP11-609L23.2	1	0.00105882	3.07322	0.0496183	0.0358235
BMPR1B	1	0.00106986	3.07012	0.0492051	0.0360622
CMPK1	1	0.0010852	3.06587	0.0495025	0.0362864
ARMT1	1	0.00110223	3.06121	0.0493992	0.0365973
GRM6	1	0.0011134	3.05819	0.0490619	0.0368715
NME3	1	0.00111558	3.0576	0.0493396	0.0368876
SH3GL2	1	0.00114601	3.04953	0.0492085	0.037661
ARL6	1	0.00116328	3.04503	0.0489596	0.0381762
RPL36AP21	1	0.00117254	3.04264	0.0489828	0.0384018
AC111155.1	1	0.00118849	3.03858	0.0490098	0.038645
RP5-1099D15.1	1	0.00118899	3.03845	0.0490239	0.038645
CTC-524C5.2	1	0.00120107	3.0354	0.0489299	0.0388338
MRPS18B	1	0.00122186	3.03022	0.048838	0.0393738
HSD17B7	1	0.00133602	3.00315	0.0484297	0.0421362
PRELID1P1	1	0.00134636	3.0008	0.0483914	0.0423918
NDUFA8	1	0.00136265	2.99713	0.0483206	0.0427649
SCG3	1	0.00139857	2.9892	0.0480704	0.0436641
ANKRD53	1	0.0014313	2.98212	0.0480635	0.0444841
TUSC3	1	0.00144464	2.97928	0.0480158	0.0447254
SLC25A17	1	0.0014673	2.97451	0.0479457	0.045281
SNRPF	1	0.00151584	2.96451	0.0476281	0.0464513
TMEM14A	1	0.00151938	2.96379	0.0477829	0.046471
UQCRC2	1	0.00158503	2.95075	0.0474474	0.0479273
MRPS21	1	0.00159992	2.94786	0.0474465	0.0481989
MALAT1	2	4.00275e-54	15.4462	0.257631	2.75109e-50
APBB3	2	9.88395e-11	6.36313	0.105209	3.17018e-08
AIG1	2	4.71699e-10	6.1187	0.101138	1.34183e-07
STMN2	2	1.39036e-09	5.94405	0.0981373	3.53924e-07
COBL	2	1.80168e-09	5.90144	0.0974378	4.46807e-07
RP11-883G14.1	2	1.87074e-09	5.89523	0.0956761	4.5687e-07
SLC6A6	2	4.88927e-08	5.33079	0.0876895	8.97816e-06
FAM84B	2	6.49183e-08	5.27908	0.0869295	1.16977e-05
MFAP4	2	1.47191e-07	5.12701	0.0843632	2.41689e-05
ARMC5	2	2.18589e-07	5.05201	0.0827645	3.45938e-05
TSPAN18	2	2.96233e-07	4.99366	0.0820247	4.55338e-05
MPHOSPH6	2	3.31448e-07	4.97193	0.0817427	4.98322e-05
MREG	2	4.89511e-07	4.89581	0.0804505	7.07233e-05
PLTP	2	7.71822e-07	4.8055	0.0788503	0.000106399
PITPNB	2	1.0999e-06	4.73415	0.0776996	0.000141112
GUCA1A	2	1.12963e-06	4.72873	0.0770634	0.000144542
HMBS	2	1.19159e-06	4.71788	0.0773887	0.000150618
MANF	2	2.0301e-06	4.60828	0.0755999	0.00023822
ZNF239	2	2.41658e-06	4.5719	0.0743914	0.000278144
CDK6	2	3.03834e-06	4.5237	0.0738706	0.000331469
ICK	2	4.99206e-06	4.41752	0.0723536	0.000506694
PDXDC2P	2	5.59773e-06	4.39269	0.0719022	0.000546773
SRSF2	2	8.07548e-06	4.31238	0.0703082	0.00074145
MED1	2	8.2906e-06	4.30656	0.0702493	0.000756868
VHL	2	8.67472e-06	4.29653	0.0702026	0.000784492
PNN	2	8.93381e-06	4.29	0.0700961	0.000806406
CSNK2A3	2	1.24606e-05	4.21551	0.0689382	0.00106671
RTN4RL1	2	1.37704e-05	4.1929	0.0685635	0.00115823
KPNA3	2	1.8051e-05	4.13111	0.0675165	0.00144022
LRP5	2	1.91916e-05	4.117	0.0671673	0.00151863
ZKSCAN5	2	2.0434e-05	4.10252	0.0666175	0.00159594
MLEC	2	2.39112e-05	4.06602	0.0663829	0.00181449
ATP2C1	2	2.66693e-05	4.04049	0.0659863	0.0019862
MIR9-3HG	2	3.00905e-05	4.0121	0.0654796	0.00220013
RNF141	2	3.0911e-05	4.00575	0.0653549	0.00224307
FZD5	2	4.20868e-05	3.9322	0.0635689	0.00290925
MCRIP2	2	5.11008e-05	3.8853	0.0632428	0.00341935
STARD7	2	5.76095e-05	3.85608	0.0627892	0.00376748
SNHG8	2	6.01768e-05	3.8454	0.0626797	0.00390184
ZBTB18	2	6.60264e-05	3.8226	0.0622678	0.00417973
RP11-153M7.1	2	7.45752e-05	3.79248	0.0617412	0.00460576
TIMM10B	2	8.14223e-05	3.77062	0.0613892	0.00493986
SLC20A1	2	8.45381e-05	3.76124	0.0612544	0.00509253
BAP1	2	9.15558e-05	3.74124	0.0608407	0.00545153
LLGL2	2	9.2465e-05	3.73876	0.0608867	0.00548706
GGH	2	0.00010235	3.71314	0.0604211	0.00596145
RP11-262H14.3	2	0.000117334	3.67844	0.0598336	0.00664072
UNC45A	2	0.000124116	3.66408	0.0594734	0.00695153
PTCH1	2	0.000133534	3.64531	0.0591712	0.00729475
EPS15	2	0.000137855	3.63711	0.0590299	0.00747727
RP11-354E11.2	2	0.000139564	3.63394	0.0585517	0.00754443
ZNF84	2	0.000143962	3.62593	0.0589553	0.00774517
CDH23	2	0.000156174	3.60484	0.0585474	0.00822344
KDELR2	2	0.000156227	3.60475	0.0586149	0.00822344
KIAA0895L	2	0.000156509	3.60428	0.0585697	0.00822928
BEX5	2	0.000164103	3.59196	0.0583437	0.00854454
MINPP1	2	0.000163796	3.59244	0.0583634	0.00854454
TRIM28	2	0.000176939	3.57229	0.0580276	0.00910452
GON4L	2	0.000181348	3.56584	0.0579515	0.00929162
STX16	2	0.000194844	3.54697	0.0576295	0.00988833
RP11-475I24.9	2	0.000196073	3.54531	0.0575582	0.00994019
SPECC1	2	0.000200126	3.53992	0.0574971	0.0101002
TUBGCP4	2	0.000200487	3.53944	0.0574846	0.0101002
PRKCD	2	0.00020287	3.53632	0.0571283	0.0101988
UBA5	2	0.000203841	3.53506	0.0574087	0.010237
SNORA11D	2	0.000206435	3.53172	0.0573278	0.0103241
SF1	2	0.000215714	3.52007	0.0571148	0.0107213
ZNF134	2	0.000223532	3.51062	0.0568956	0.0110188
FXYD6	2	0.000227475	3.50597	0.056926	0.0111788
EIF2B1	2	0.000231989	3.50073	0.056852	0.0113658
CHST8	2	0.000233991	3.49844	0.0566866	0.0114444
CDK16	2	0.000237001	3.49503	0.0567495	0.0115408
FAM92A	2	0.000255205	3.47523	0.0564299	0.0123151
DTX3	2	0.000286796	3.4438	0.0558891	0.0135674
ENDOG	2	0.00028984	3.44095	0.0557671	0.0136845
RASSF1	2	0.000297209	3.43415	0.0556335	0.0139912
BRICD5	2	0.000307977	3.42449	0.0553508	0.0144199
NPIPB15	2	0.000318496	3.41535	0.0552627	0.0147907
EXOC2	2	0.000326518	3.40857	0.0551469	0.0150471
CDK7P1	2	0.00033087	3.40496	0.0550921	0.0151894
HACE1	2	0.000354617	3.38598	0.054742	0.0160221
TMEM179B	2	0.000363908	3.37888	0.0547862	0.0163169
PORCN	2	0.000371928	3.37288	0.0546404	0.0166145
SNRPD3	2	0.000382744	3.36498	0.0544759	0.0169404
FGF7P8	2	0.000384222	3.36392	0.054376	0.0169815
TOP1MT	2	0.000403711	3.35024	0.0533028	0.0176252
AC107081.5	2	0.000415789	3.34206	0.0541414	0.0180107
SLC2A11	2	0.000415911	3.34198	0.0541359	0.0180107
IARS	2	0.000428677	3.33358	0.0540186	0.0183988
TRIM24	2	0.000428148	3.33393	0.0539881	0.0183988
PRELID2	2	0.000429364	3.33314	0.0539714	0.018411
CDK7	2	0.000449957	3.32008	0.0537527	0.019073
VKORC1L1	2	0.000478275	3.303	0.0534294	0.0200963
ATP6V1A	2	0.000481903	3.30088	0.0534349	0.0201888
FCF1	2	0.000484392	3.29944	0.0533535	0.0202648
TDRD3	2	0.000503419	3.28861	0.0532432	0.0208434
RP11-56G10.2	2	0.000504497	3.28801	0.053258	0.02087
SLC29A3	2	0.000506317	3.28699	0.053236	0.0209094
PLEKHB2	2	0.000513893	3.28281	0.0531658	0.021204
ITPK1	2	0.000528255	3.27503	0.0530372	0.0216217
XPC	2	0.000538133	3.26979	0.0529084	0.0218807
STK38	2	0.000544103	3.26667	0.0526496	0.0220464
ZBTB7A	2	0.000546887	3.26522	0.0528606	0.0221289
UBA1	2	0.00056889	3.25404	0.0526603	0.0227136
SCARNA22	2	0.000576925	3.25005	0.0524636	0.0229203
SERTAD2	2	0.000603479	3.23723	0.0523604	0.0237206
CCPG1	2	0.000610747	3.23381	0.0523152	0.0239086
CSNK1A1	2	0.00061779	3.23054	0.0522265	0.0241254
ARV1	2	0.000625412	3.22703	0.0521781	0.024344
PRDX4	2	0.00072738	3.18356	0.051458	0.0274255
H2AFX	2	0.000733968	3.18095	0.0514431	0.0275403
AUP1	2	0.00074376	3.17711	0.0513768	0.0277891
SSBP3	2	0.000752466	3.17373	0.0512442	0.0280158
TP53I11	2	0.000756812	3.17206	0.0512919	0.0281383
BACH2	2	0.000762589	3.16985	0.0512414	0.0283094
PCYOX1	2	0.000769102	3.16738	0.0512036	0.0284852
ZNF17	2	0.000778795	3.16373	0.0508204	0.0287998
EPHA5-AS1	2	0.000800737	3.15564	0.0509881	0.0293933
IPPK	2	0.000845288	3.13981	0.0499377	0.0305241
NUTM2A-AS1	2	0.00084619	3.1395	0.0507465	0.0305241
CTD-2636A23.2	2	0.000862863	3.13378	0.0503991	0.0310031
NCOA4	2	0.000871279	3.13093	0.0505974	0.0312049
PKIA	2	0.000873389	3.13022	0.0505816	0.0312414
FADS2	2	0.000883862	3.12671	0.0504691	0.031429
FADS1	2	0.00091115	3.11776	0.0503736	0.0322326
RASA4CP	2	0.000928754	3.11212	0.0502786	0.0327124
PDDC1	2	0.000953635	3.1043	0.0500912	0.0332023
PPP6R1	2	0.000956597	3.10339	0.0500774	0.0332023
MFSD1	2	0.000977073	3.09711	0.0499818	0.0336251
NXPH4	2	0.00101201	3.08669	0.0498571	0.0346039
ZNRF2P1	2	0.00102877	3.0818	0.0496102	0.0350228
RP11-728F11.4	2	0.0010549	3.07432	0.0496307	0.035741
DOCK3	2	0.00107113	3.06977	0.0494514	0.0360622
FGF7P6	2	0.00107049	3.06994	0.0495294	0.0360622
NFS1	2	0.00107452	3.06882	0.0494548	0.0361139
LIN9	2	0.00108445	3.06607	0.0486747	0.0362864
ZNF140	2	0.00109232	3.06391	0.0493963	0.0363852
DNAJC27-AS1	2	0.00110104	3.06153	0.0492126	0.0365829
MIATNB	2	0.00114747	3.04914	0.048919	0.0376834
POM121C	2	0.00117463	3.04211	0.0490912	0.0384073
AC016292.3	2	0.00119458	3.03704	0.0490163	0.0386715
SMAD4	2	0.0012275	3.02883	0.0488672	0.039529
SNORA11E	2	0.00127643	3.017	0.0486254	0.0408736
RASA4DP	2	0.00132371	3.00596	0.0484971	0.0418982
RP11-312J18.5	2	0.00132932	3.00468	0.0484621	0.0419926
GLRX	2	0.00135162	2.99961	0.0482668	0.0425297
RABGAP1	2	0.00143844	2.9806	0.048027	0.0445619
KCNF1	2	0.00144927	2.9783	0.0480188	0.0448397
SCD5	2	0.0015446	2.95872	0.0476127	0.0470926
SQLE	2	0.00157783	2.95215	0.0475748	0.0478028
RHNO1	2	0.00158513	2.95073	0.0475322	0.0479273
RP11-651P23.4	2	0.00158996	2.94979	0.0475327	0.0479591
MIR7-3HG	2	0.00160621	2.94664	0.0474597	0.0482977
M6PR	2	0.00161818	2.94435	0.0474492	0.0485389
PLPPR4	2	0.001625	2.94305	0.0474212	0.0486803
RACGAP1	2	0.00162751	2.94257	0.0473203	0.0486948
RBP3	2	0.00163058	2.94198	0.0473558	0.048726
RP13-143G15.4	3	7.94764e-23	9.7651	0.16267	1.1949e-19
VTN	3	4.31682e-20	9.10491	0.151486	4.99937e-17
CTD-2034I21.2	3	2.96979e-18	8.63371	0.142774	2.9159e-15
TRPV2	3	4.35326e-16	8.04384	0.133212	3.49066e-13
PPP4R4	3	6.32452e-16	7.99797	0.132419	4.90772e-13
RP11-545G3.2	3	1.27815e-10	6.32354	0.103776	4.01916e-08
RP11-115N4.1	3	2.02261e-10	6.25227	0.10334	6.15885e-08
RP11-819M15.1	3	6.64264e-10	6.06391	0.099819	1.8262e-07
ACSL6	3	7.21439e-10	6.05062	0.0999498	1.97211e-07
JMJD7	3	8.73072e-10	6.01982	0.0981755	2.30793e-07
DTNBP1	3	1.1071e-09	5.98126	0.0984667	2.84832e-07
DERL3	3	2.26529e-09	5.86356	0.095432	5.44928e-07
SRPK2	3	4.06723e-09	5.76565	0.0951757	9.40763e-07
LY6E	3	9.3395e-09	5.62381	0.0922786	2.00595e-06
HCN1	3	1.50745e-08	5.54057	0.0912673	3.13961e-06
KCNN3	3	1.61931e-08	5.52802	0.0909064	3.35804e-06
DPP6	3	3.40544e-08	5.39609	0.0881308	6.45037e-06
ZNF71	3	8.6647e-08	5.22592	0.0857891	1.52141e-05
DDX49	3	1.09481e-07	5.18247	0.0852829	1.88116e-05
ZDHHC22	3	3.12432e-07	4.98337	0.0816021	4.75256e-05
LIMCH1	3	3.19664e-07	4.97894	0.0818048	4.82112e-05
MAP4K3	3	4.32538e-07	4.92008	0.0808361	6.36387e-05
NPFF	3	9.2039e-07	4.77016	0.077851	0.000122405
DKC1	3	9.9662e-07	4.75411	0.0780458	0.000131006
UBE2T	3	1.05488e-06	4.74262	0.0774939	0.000136428
PPM1H	3	1.19277e-06	4.71768	0.0767006	0.000150618
DDX25	3	1.22747e-06	4.71184	0.0770987	0.000153788
ISOC2	3	1.3332e-06	4.69498	0.0768449	0.000164044
BRINP1	3	1.37627e-06	4.68847	0.0765176	0.000168913
RP11-762I7.5	3	1.49574e-06	4.6714	0.0764477	0.000181722
PSMG1	3	2.52472e-06	4.56272	0.07429	0.000285804
TSTD1	3	2.56949e-06	4.55903	0.0747604	0.000288833
RNF157	3	2.68499e-06	4.54979	0.0745626	0.000299022
SEMA4F	3	2.864e-06	4.53619	0.0732248	0.000314588
PYROXD1	3	3.62497e-06	4.48622	0.0734598	0.000386698
GTF2H5	3	4.59695e-06	4.43531	0.0726579	0.000473584
ECHDC3	3	4.89938e-06	4.42157	0.0721187	0.000500455
KATNBL1	3	5.21442e-06	4.40809	0.0722029	0.000518329
CALD1	3	5.43741e-06	4.39901	0.0720484	0.000534968
SPTBN4	3	6.26654e-06	4.3681	0.0708921	0.000598193
RNA5SP284	3	6.66986e-06	4.35446	0.0710939	0.000630439
CABP4	3	7.02122e-06	4.3432	0.071007	0.000659761
PYY	3	8.45509e-06	4.30221	0.0697641	0.000767515
ELOVL2	3	9.37007e-06	4.2794	0.0700242	0.000841737
IGF2BP3	3	1.34435e-05	4.19835	0.0684119	0.0011347
CCDC93	3	1.43964e-05	4.18281	0.068291	0.00120039
LIN7B	3	1.47469e-05	4.17734	0.0682563	0.00122115
PSME2P2	3	1.50106e-05	4.17331	0.0681501	0.0012366
TMEM17	3	1.95976e-05	4.11217	0.0668932	0.00154314
SEMA4G	3	2.02594e-05	4.1045	0.0666225	0.00158746
C9orf64	3	2.30131e-05	4.07494	0.0663356	0.00176023
RNF183	3	2.37028e-05	4.06806	0.0660247	0.00180437
IRF9	3	2.46485e-05	4.05893	0.0661041	0.00186457
KIAA1456	3	2.6521e-05	4.0418	0.0654929	0.00197958
DUX4L50	3	2.68553e-05	4.03886	0.065795	0.00199696
AHSA2	3	2.88084e-05	4.02236	0.0656717	0.00212251
PLA2G12A	3	2.9589e-05	4.01606	0.065565	0.00217337
SPATS2L	3	3.04497e-05	4.0093	0.0653282	0.00221965
UBE2NL	3	3.25738e-05	3.99335	0.0651473	0.00233904
WBP1	3	3.53681e-05	3.9738	0.0648628	0.00250973
RP11-354M20.3	3	3.86539e-05	3.9526	0.0642392	0.00271882
AMN1	3	4.28838e-05	3.92768	0.064069	0.0029543
TSPAN33	3	4.3852e-05	3.92231	0.063511	0.00299682
UCHL3	3	5.36175e-05	3.87361	0.0631629	0.00354905
SUZ12	3	6.1955e-05	3.83826	0.0625299	0.0039956
PIP4K2C	3	7.00773e-05	3.8079	0.061973	0.00439757
POP5	3	7.09806e-05	3.80473	0.0619665	0.00444076
C4orf48	3	7.26602e-05	3.79893	0.0617978	0.00451648
ZNF574	3	8.68093e-05	3.7546	0.0610745	0.00520758
PNCK	3	8.83558e-05	3.75017	0.0610486	0.00528717
HPRT1	3	9.24945e-05	3.73868	0.0608592	0.00548706
PLA2G12AP1	3	9.31913e-05	3.73679	0.060793	0.00551479
DDX19A	3	9.7593e-05	3.72517	0.0606255	0.00573297
NMRK1	3	0.000100111	3.71874	0.0602681	0.00585232
PAFAH2	3	0.000105299	3.70595	0.0601706	0.00608268
PLK3	3	0.000105316	3.70591	0.0595428	0.00608268
DNAH14	3	0.000107761	3.70009	0.060112	0.00620895
AP000459.7	3	0.000116703	3.67981	0.0591124	0.00661328
ABHD8	3	0.000125882	3.66046	0.0595148	0.00700962
CACNA2D4	3	0.000127498	3.65719	0.0593749	0.00705875
DPP3	3	0.000128859	3.65447	0.0593631	0.00710141
MOGS	3	0.000130831	3.65057	0.0592705	0.00719361
INSIG1	3	0.00013186	3.64856	0.0593175	0.0072254
CGREF1	3	0.000133039	3.64627	0.0588118	0.00728173
SLC6A8	3	0.000136091	3.64043	0.0592079	0.00740667
TSEN34	3	0.000162142	3.59509	0.0584593	0.00849918
AGTRAP	3	0.000170605	3.58182	0.0579878	0.00882578
PRR13P5	3	0.000197267	3.54371	0.0575704	0.0099902
PDE6G	3	0.000200175	3.53985	0.0573583	0.0101002
PSD3	3	0.000209742	3.52751	0.0570545	0.0104461
SYS1	3	0.000210889	3.52607	0.0572794	0.0104923
P4HA2	3	0.000220997	3.51365	0.0566155	0.0109162
DPH2	3	0.000235101	3.49718	0.0567032	0.0114832
CDC37L1-AS1	3	0.000236635	3.49545	0.0560504	0.0115362
SIGIRR	3	0.000262195	3.46798	0.0560224	0.0125767
BRD7	3	0.000311621	3.42129	0.0554917	0.0145275
RP1-65P5.3	3	0.00035467	3.38594	0.0548728	0.0160221
MICU3	3	0.000358316	3.38314	0.0547912	0.0161413
DNAJC25-GNG10	3	0.000360218	3.38168	0.0547684	0.0162119
SARNP	3	0.000372948	3.37213	0.0546813	0.0166446
CDC42SE2	3	0.000409041	3.3466	0.0541734	0.0177772
CD59	3	0.00041811	3.34052	0.0541063	0.0180896
TDRD9	3	0.000427828	3.33413	0.0538567	0.0183988
H3F3B	3	0.000440099	3.32626	0.0535832	0.0187817
RNA5SP283	3	0.000446058	3.32251	0.0538004	0.0189824
ZSCAN16-AS1	3	0.000476561	3.30401	0.0534959	0.0200593
RP11-15A1.3	3	0.000477709	3.30334	0.0534382	0.0200901
AC007349.7	3	0.000501347	3.28977	0.0524064	0.0207934
AARS	3	0.000506291	3.28701	0.0532411	0.0209094
RCN1	3	0.000525742	3.27638	0.053046	0.0215588
ACOT8	3	0.000534224	3.27185	0.0529686	0.0217814
CLN3	3	0.000553888	3.26162	0.0526821	0.0222892
KPNA2	3	0.000563841	3.25657	0.0526862	0.0225494
KIAA2013	3	0.000588765	3.24427	0.0523938	0.0233136
RP11-169K17.3	3	0.000604983	3.23652	0.0520661	0.0237603
UBE2N	3	0.000608458	3.23489	0.0522818	0.0238384
METAP2	3	0.000624483	3.22746	0.0522222	0.0243275
GTF2F2	3	0.00062852	3.22561	0.0521926	0.024398
PLOD1	3	0.000671377	3.20668	0.0515383	0.0257171
HSPB8	3	0.000749803	3.17476	0.051193	0.0279425
FDFT1	3	0.000776646	3.16454	0.0511627	0.0287425
[truncated: 504 more rows]

## Sheet: Supplementary File 1J
Supplementary File 1J	Differentially expressed genes for low resolution early rod and L/M cone clusters (ER / LM)
[truncated: 697 more rows]
